# Supplementary material for: Neisseria gonorrhoeae LIN codes provide a robust, multi-resolution lineage nomenclature
Source: eLife. 2025 Dec 31;14:RP107758. doi: 10.7554/eLife.107758 (PMC12755878; doi:10.7554/eLife.107758)
Supplement: Supplementary file 1. — This dataset comprises 896 N. gonorrhoeae isolates, collating a representative range of Ng cgMLST v1 core genome groups (at allelic mismatch threshold 300). [file elife-107758-supp1.xlsx]

## Sheet: Sheet1
id	isolate	country	year	ST (MLST)	cgST (N. gonorrhoeae cgMLST v1)	Core genome group (Threshold 300 allelic mismatches)	cgST (N. gonorrhoeae cgMLST v2)	LINcode (N. gonorrhoeae cgMLST v2)	run_accession
2855	FA1090	USA	1980	1899	1;16470	404	1	6_0_1_0_1_0_0_0_0_0_0
14729	MS-11	USA	1960	6959	4;16472;53968	406	4	0_0_0_0_0_0_0_0_0_0_0
15698	DGI2	USA		8421	5;16473;53969;69622	407	5	8_1_0_3_1_0_0_0_0_0_0
15935	PID24	USA		8418	6;16474;53864	408	6	0_12_8_0_0_0_0_0_0_1_0
15936	DGI18	USA		8418	7;16475;53865	408	7	0_12_8_0_0_0_0_0_0_0_0
21066	PID18	Unknown		1926	10;16477;53866;69624	410	10	8_1_0_1_1_0_0_0_0_0_0
21067	1291	Unknown		8422	69625	1019	11	0_0_7_0_0_0_0_0_0_0_0
21068	PID1	Unknown		10154	69626	1020	12	1_10_0_0_0_0_0_0_0_0_0
21070	F62	Unknown		1900	14;16481;24261;52066	413	14	6_0_0_0_0_0_0_0_0_0_0
21071	SK-92-679	Unknown		6715	5223;16482	13	15	0_2_65_0_0_0_0_0_0_0_0
26827	12028_2010	Ireland	2010	10682	17;16484;47786;53867;69627	410	17	8_1_0_0_0_0_0_0_0_0_0	ERR351670
27140	S058	UK [England]	1995	1918	69640	415	31	26_0_0_0_1_0_0_5_0_0_0	ERR029244
27148	S151	UK [England]	1996	1918	69645	415	36	26_0_0_0_1_0_0_0_0_24_0	ERR029251
27192	S184	UK [England]	1996	1918	69665	415	60	26_0_0_0_1_0_0_0_0_21_0	ERR029243
27207	S407	UK [England]	1997	1918	69678	415	72;76	26_0_0_0_1_0_0_0_0_2_0	ERR049003
27215	S378	UK [England]	1997	1918	69686	415	18;69	26_0_0_0_1_0_0_0_1_0_0	ERR048995
27225	S433	UK [England]	1997	1918	69696	415	78	26_0_0_0_1_0_0_0_1_1_0	ERR049014
27270	GCGS0200	USA	2009	6722	69701	1021	119	14_1_0_2_0_0_0_0_0_0_0	ERR222899
27280	GCGS154	USA	2009	8130	7738;16566	25	129	0_0_26_12_0_0_0_0_0_0_0	ERR223660
27283	ERR191744	USA		10311	311;16568;23971;24263	418	132	0_0_43_10_1_0_0_0_0_1_0	ERR191744
27296	GCGS0237	USA	2010	1901	125	3	145	0_2_0_1_0_55_0_3_0_0_0	ERR222936
27364	GCGS0184	USA	2009	1582	201;16598;53874;69709	32	210	0_0_41_2_0_0_0_0_0_0_0	ERR223690
27465	ERR173153	Unknown		1902	69715	1023	310	0_0_7_2_0_0_0_1_0_0_0	ERR173153
27468	ERR173151	Unknown		1902	69717	1023	313	0_0_7_2_0_0_0_0_0_0_0	ERR173151
27471	GCGS0072	USA	2009	10316	69718	1024	316	22_0_1_0_0_0_0_0_0_0_0	ERR191801
31335	W0362	UK [England]	2004	1901	323	18	333;342;382;384;387;392;410;438	0_0_12_2_3_0_0_0_0_0_0	ERR234385
31472	BEL_09_43	Belarus	2009	1601	69732	426	461	0_0_0_2_0_0_0_0_0_0_0	ERR350024
31476	BEL_09_28	Belarus	2009	1595	487;16673;47809;69734	427	465	1_1_35_0_0_0_0_0_0_0_0	ERR350029
31479	EST_10_6	Estonia	2010	11175	488;16675;23978;52070;53971;56317;69735	428	468;807	13_0_0_0_0_0_0_0_0_0_0	ERR350036
31483	EST_10_22	Estonia	2010	1931	69737	1029	472	1_1_15_0_0_0_0_0_0_0_0	ERR350040
31487	BEL_10_59M	Belarus	2010	1595	496;16682;47817;69739	427	476	1_1_35_0_1_0_0_0_0_0_0	ERR350050
31496	SI10_28	Slovenia	2010	10241	506;16689;47821;69744	429	485	0_2_1_11_0_0_0_0_0_0_0	ERR350067
31499	EST_11_17	Estonia	2011	11175	514;16692;23980;53972;56323;69747	428	488;832	13_0_0_0_0_0_0_0_1_0_0	ERR350071
31507	POL_11_89	Poland	2011	1588	526;16697;47829;53875;53944	21	496;881	0_0_33_12_2_0_0_0_0_0_0	ERR352686
31512	EST_12_26	Estonia	2012	6726	529;16701;47832;52073;69751	431	501	41_0_0_0_7_0_0_0_0_0_0	ERR352718
31522	989000018	China	1998	1580	510;47836	56	511	0_2_6_0_0_1_0_0_0_0_0	ERR352767
31523	989000168	China	1998	11178	511;16705;47837;52074;53836	57	512	0_2_33_1_0_0_0_0_0_0_0	ERR352769
31525	989000443	China [Hong Kong]	1998	11077	535;16707;23983;47839;52075	432	514;818	0_13_2_1_0_0_0_0_0_0_0	ERR352775
31526	989000163	Indonesia	1998	6715	538;16708;24267;47840;53973;69753	433	515	0_20_2_0_0_0_0_0_0_0_0	ERR352779
31528	989000021	Philippines	1998	10634	516;16710;47841;53974	60	517	14_1_0_1_0_0_0_0_0_0_0	ERR352788
31529	989000027	Philippines	1998	1583	9661;16711;47842;53975;69755	389	518;581	0_2_20_0_0_0_0_0_0_0_0	ERR352792
31533	989000070	Thailand	1998	7371	497;16715;47844;52076;53976;69758	306	522	0_8_1_0_0_0_0_0_0_0_0	ERR352811
31534	989000077	Thailand	1998	1903	9662;16716;23984;69759	64	523;840	0_2_37_0_0_1_0_0_0_0_0	ERR352813
31535	989000080	Thailand	1998	1583	501;16717;47845;52077;69760	307	524	0_2_32_0_0_0_0_0_0_0_0	ERR352815
31536	989000438	Unknown		10634	524;16718;47846;52078;53977;56328;69761	66	525	0_20_1_0_0_0_0_0_0_0_0	ERR352829
31539	999000079	Unknown		12077	560;16721;24966;47848;52079;69763	434	528	40_0_0_0_0_0_0_0_0_0_0	ERR352841
31543	999000020	Unknown		7371	503;16724;47852;52080;69764	306	532	0_8_1_0_1_0_0_0_0_0_0	ERR352849
31544	IN_09_3306	India	2009	1600	69765	1031	533	0_0_48_0_0_0_0_0_0_0_0	ERR363643
31545	IN_10_167	India	2010	11180	533;16726;47854;53978	71	534	0_2_26_0_0_0_0_0_0_0_0	ERR363648
31547	IN_10_1148	India	2010	11181	69767	1032	536	0_0_43_3_0_0_0_0_0_0_0	ERR363657
31548	IN_10_104	Bhutan	2010	8776	536;16729;24269;24968;47857	390	537	0_18_1_10_0_1_0_0_0_0_0	ERR363660
31549	IN_10_116	Bhutan	2010	8776	537;16730;24969;47858	390	538	0_18_1_10_1_0_0_0_0_0_0	ERR363661
31553	989000034	Cuba	1998	11182	69770	1034	542	1_1_7_0_0_0_0_0_0_0_0	ERR349888
31554	989000209	Cuba	1998	11183	69771	1035	543	1_1_13_0_0_0_0_0_0_0_0	ERR349889
31555	989000277	Cuba	1998	1931	69772	1035	544	1_1_13_0_1_0_0_0_0_0_0	ERR349890
31556	989000371	Cuba	1998	11184	504;16736;23989	308	545	0_2_11_0_0_0_0_0_0_0_0	ERR349891
31557	989000062	Jamaica	1998	11185	69773	1036	546	1_1_4_2_0_0_0_0_0_0_0	ERR349892
31559	GC_0809944	Brazil	2008	1583	585;16739;23991;47864;53981;69775	440	548	18_0_2_0_0_0_0_0_0_0_0	ERR349895
31561	14_358	Ecuador	2008	11186	69776	1037	550	1_1_30_0_0_0_0_0_0_0_0	ERR349897
31562	WHO_F	Canada	1990	10934	590;16741;24971;52082;53982;69777	441	551	34_0_0_0_0_0_0_0_0_0_0	ERR349898
31563	989000059	USA	1998		9668;16742	83	552	0_2_18_0_1_0_0_0_0_0_0	ERR349900
31568	259000214	UK	1986	1931	69779	1038	557	1_1_1_0_0_0_0_0_0_0_0	ERR349907
31571	259000220	UK	1989	1594	596;16747;47868	414	560	1_8_5_0_2_0_0_0_0_0_0	ERR349910
31572	259000216	UK	1990	1906	600;16748;23995;47869;80138	442	561	42_0_0_0_2_0_0_0_0_0_0	ERR349911
31573	259000213	UK	1993	8152	605;16749;23996;40989;47870;53877;56333;69782	443	562	4_0_2_0_0_0_0_0_0_0_0	ERR349912
31574	259000221	UK	1993	11181	515;24270;47871	311	563	14_0_0_0_0_0_0_0_0_0_0	ERR349913
31575	259000222	UK	1993	10899	69783	1019	564	0_0_7_1_0_0_0_0_0_0_0	ERR349914
31577	259000224	UK	1993	1920	69784	1039	566	0_0_45_0_0_0_0_0_0_0_0	ERR349916
31579	989000439	Germany	1998	6726	620;16753;47874;52083;69786	431	568	41_0_0_0_3_0_0_0_0_0_0	ERR349927
31581	989000146	Greece	1998	1902	569;47876;56336	42	570	0_0_8_1_0_0_0_0_0_0_0	ERR349930
31582	989000120	Norway	1998	1591	622;16754;23997;47877;53984;69787	445	571	11_0_1_0_0_0_0_0_0_0_0	ERR349936
31584	989000170	Poland	1998	1601	625;16756;40990;47879;53985	426	573	0_0_0_1_1_0_0_0_0_0_0	ERR349938
31586	989000380	Russia	1998	11188	574;16758;47880	90	575	0_2_7_3_0_0_0_0_0_0_0	ERR349940
31587	989000257	Russia	1998	9903	575;16759;47881;53878;53945	90	576	0_2_7_4_0_0_0_0_0_0_0	ERR349941
31590	989000404	Spain	1998	1595	629;16762;47883;69791	442	579	42_0_0_1_0_0_0_0_0_0_0	ERR349945
31592	989000026	UK	1998	1583	9673;16764;47884;53986;69793	389	581	0_2_20_0_0_0_0_0_0_0_0	ERR349951
31594	999000056	The Netherlands	1999	12078	582;16765;36043	90	583	0_2_7_0_0_0_0_0_0_0_0	ERR349959
31598	05_590_290	Russia	2004	6810	633;16769;40991;47887;52084;69795	447	587	1_1_21_1_0_0_0_0_0_0_0	ERR349978
31608	590_277	Poland	2008	11189	69798	1040	597	0_20_6_0_0_0_0_0_0_0_0	ERR349994
31620	NO_09_3580	Norway	2009	1901	608	18	609	0_0_12_2_3_0_13_0_2_0_0	ERR350010
31627	EST_09_5	Estonia	2009	8776	652;16785;47898;52088;53987;56344;69806	449	616;769;894	31_1_0_0_0_0_0_0_0_0_0	ERR350019
31639	POL_10_22	Poland	2010	7363	586;16793;47903	315	628	0_7_1_0_0_0_0_0_0_0_0	ERR350059
31653	EST_12_20	Estonia	2012	11175	684;16799;24004;52090;53988;56354;69813	428	642	13_0_0_0_0_0_0_0_2_1_0	ERR352712
31654	EST_12_21	Estonia	2012	1931	69814	1029	643	1_1_15_0_0_0_0_0_0_0_0	ERR352714
31662	215/-02	Thailand	1979	1920	689;16806;47911;53989;56357	451	651	0_0_3_0_0_0_0_0_0_0_0	ERR352749
31665	WHO_J	Australia	1996	1599	69816	1041	654	0_2_31_0_0_0_0_0_0_0_0	ERR352755
31666	WHO_I	Australia	1997	1890	694;16809;53879;53946	452	655	0_12_3_0_0_0_0_0_0_0_0	ERR352757
31669	989000269	China	1998	11193	695;16811;47913;53880;53947	57	658	0_2_33_0_0_0_0_0_0_0_0	ERR352771
31670	989000050	Indonesia	1998	7365	9684;16812;40993;47914	317	659	0_2_57_0_0_0_0_0_0_0_0	ERR352777
31671	989000181	Malaysia	1998	7367	659;16813	83	660	0_2_18_0_0_0_0_0_0_0_0	ERR352786
31672	989000294	Philippines	1998	11194	9685;16814;47915;69817;79329	104	661	0_2_41_0_0_0_0_0_0_0_0	ERR352801
31673	989000441	Philippines	1998	10634	9686;16815;47916;53881;53948	60	662	14_1_0_0_0_0_0_0_0_0_0	ERR352805
31674	989000019	Thailand	1998	11195	662;16816;47917	105	663;866	0_0_12_0_0_0_0_0_0_0_0	ERR352807
31675	989000060	Thailand	1998	1583	663;16817;40994;47918;53990	106	664	0_0_56_0_0_1_0_0_0_0_0	ERR352809
31676	989000091	Thailand	1998	11196	9687;16818;47919;52091	107	665	0_2_19_0_0_0_0_0_0_0_0	ERR352817
31678	989000104	Thailand	1998	11197	666;47921	108	667	0_15_1_0_0_0_0_0_0_0_0	ERR352821
31679	989000142	Unknown		1583	667;16820;40995;53991	106	668	0_0_56_0_0_0_0_0_0_0_0	ERR352825
31680	989000176	Unknown		6720	668;16821;47922;53992;56359;69819	391	669	0_2_25_0_0_0_0_0_0_0_0	ERR352827
31683	999000133	Unknown		11198	699;16823;47925;52092;53993	432	672	0_13_2_2_0_0_0_0_0_0_0	ERR352837
31684	999000023	Unknown		1903	9689;9712;24008;24039;47926;48016;69821;69891	64	673;824	0_2_37_0_2_0_0_0_0_0_0	ERR352851
31686	GCGS0015	USA	2009	10311	703;16825;24010;24276	418	675	0_0_43_10_1_0_0_0_0_0_0	ERR355925
31688	999000072	Thailand	1999	1582	705;16827;47928	454	677	0_0_24_0_0_0_0_0_0_0_0	ERR363577
31689	999000085	Thailand	1999	1601	9691;16828;47929	392	678	0_0_54_0_0_0_0_0_0_0_0	ERR363578
31690	999000116	Thailand	1999	7369	69823	1042	679	17_0_0_0_0_0_0_0_0_0_0	ERR363579
31701	IN_07_1808	India	2007	11199	710;16837;24014;47933;52093;53994	455	690	0_0_5_0_0_0_0_0_0_0_0	ERR363609
31705	08_590_215	Indonesia	2008	1891	9693;16839;47936;56363;69827	394	694	0_6_0_1_0_0_0_0_0_0_0	ERR363614
31707	08_590_372	Philippines	2008	11200	714;16841;47938;53995	456	696	0_17_0_0_0_0_0_0_0_0_0	ERR363619
31709	IN_09_3090	India	2009	12079	69828	1043	698	25_0_0_0_0_0_0_0_0_0_0	ERR363637
31711	IN_09_3293	India	2009	8134	720;16845;47942	37	700	0_0_47_16_0_0_0_0_0_0_0	ERR363639
31713	IN_09_3782	India	2009	11181	69831	1032	702	0_0_43_3_1_0_0_0_0_0_0	ERR363641
31715	BX5602	Pakistan	2009	1903	69832	37	704	0_0_47_1_3_0_0_0_0_0_0	ERR363644
31720	IN_10_1457	India	2010	8775	736;16853;24282;47950;53996;69837	459	709	0_20_0_0_0_2_0_0_0_0_0	ERR363650
31721	IN_10_1412	India	2010	1927	737;16854;47951;53997	460	710	0_12_1_0_0_0_0_0_0_0_0	ERR363651
31722	IN_10_1221	India	2010	6813	738;16855;47952;53883;53950;56365	461	711	0_0_6_0_0_0_0_0_0_0_0	ERR363652
31723	IN_10_1820	India	2010	11191	711;16856;24016;24283;47953;56366	124	712	0_18_7_0_1_0_0_0_0_0_0	ERR363653
31724	IN_10_1832	India	2010	11204	69838	1044	713	0_18_1_11_0_0_0_0_0_0_0	ERR363654
31725	IN_10_1877	India	2010	1927	739;16858;47955;53998	460	714	0_12_1_0_0_0_1_0_0_0_0	ERR363655
31726	IN_10_95	Bhutan	2010	11205	740;16859;53884;53951;56367	462	715	0_0_6_1_0_0_0_0_0_0_0	ERR363658
31727	IN_10_195	Bhutan	2010	11205	744;16860;53885;53952;56368	462	716	0_0_6_1_0_0_0_0_0_0_0	ERR363659
31728	IN_10_151	Bhutan	2010	8776	716;16861;24285;24980;47956	390	717;719	0_18_1_10_0_0_0_0_0_0_0	ERR363662
31729	IN_10_152	Bhutan	2010	8776	717;16862;24286;24981;47957	390	718	0_18_1_10_0_2_0_0_0_0_0	ERR363663
31730	IN_10_145	Bhutan	2010	8776	718;16863;24982;47958	390	719	0_18_1_10_0_0_0_0_0_0_0	ERR363664
31735	BX2715	Pakistan	2011	1599	69841	1045	724	0_2_22_0_0_0_0_0_0_0_0	ERR363670
31738	989000202	Greece	1998	1583	726;16870;47964	90	727	0_2_7_1_0_0_0_0_0_0_0	ERR349932
31742	989000022	Philippines	1998	1580	730;47965	56	731	0_2_6_0_0_0_0_0_0_0_0	ERR352790
31756	NG0106	Japan	2001	7363	743;47976;52095	130	744	0_2_34_0_0_0_0_0_0_0_0	ERR363587
31757	08_590_48	Thailand	2008	8130	786;16883;47977;49783;69845	546	745	0_0_29_0_0_0_0_0_0_0_0	ERR363622
31758	WHO_G	Australia	2007	1903	745;16884;24021;69846	64	746;3392	0_2_37_0_0_0_0_0_0_0_0	ERR363606
31763	989000201	Greece	1998	11197	750;47981	108	751	0_15_1_0_1_0_0_0_0_0_0	ERR349931
31764	WHO_N	Australia	2001	1583	751;16889;53999;69849	132	752;1047;3477;19715	0_2_38_0_0_0_0_0_0_0_0	ERR363586
31779	08_590_79	Thailand	2008	8145	69853	1046	767	0_2_58_0_0_0_0_0_0_0_0	ERR363625
31781	EST_09_10	Estonia	2009	8776	794;16901;47993;52097;54000;56378;69854	449	769	31_1_0_0_0_0_0_0_0_0_0	ERR350020
31782	989000075	Italy	1998	8114	69855	44	770	1_1_22_9_0_0_0_0_0_0_0	ERR349934
31796	08_590_193	Thailand	2008	8112	69867	1047	784	1_1_17_8_0_0_0_0_0_0_0	ERR363628
31798	989000355	France	1998	12080	813;16917;24028;47999;52100;54002	465	786	11_0_3_0_0_0_0_0_0_0_0	ERR349923
31799	05_590_339	Russia	2004	6810	69869	1048	787	1_1_21_0_0_0_0_0_0_0_0	ERR349975
31801	590_44	Germany	2008	10622	819;16920;48001;54004;69871	467	789	0_20_4_0_0_0_0_0_0_0_0	ERR349990
31802	05_590_374	UK [Scotland]	2005	8148	69872	1049	790	5_0_0_0_0_0_0_0_0_1_0	ERR349979
31805	05_590_249	Russia	2004	1905	829;16924;24029;48003;53886	469	793	3_0_0_0_0_0_0_0_0_0_0	ERR349970
31806	05_590_281	Russia	2004	6726	830;16925;48004;52101;69874	431	794	41_0_0_0_4_0_0_0_0_0_0	ERR349977
31808	989000335	Hungary	1998	6726	835;16927;48005;52102;69876	431	796	41_0_0_0_0_0_0_0_0_0_0	ERR349933
31811	08_590_81	Thailand	2008	8776	796;16930;24031;24289;48006	236	799	0_18_1_4_0_0_0_0_0_0_0	ERR363627
31812	05_590_273	Russia	2004	11212	797;16931;24032;24290;48007	142	800	0_18_12_0_0_0_0_0_0_0_0	ERR349976
31813	IN_09_2768	India	2009	8775	844;16932;24987;48008;54006;69878	459	801	0_20_0_0_0_1_0_0_0_0_0	ERR363636
31814	IN_08_1570	India	2008	8775	850;16933;24291;48009;54007;69879	459	802	0_20_0_0_0_0_0_1_0_0_0	ERR363633
31815	989000114	Indonesia	1998	1931	800;16934;48010	143	803	1_1_25_0_0_0_0_0_0_0_0	ERR352781
31816	999000135	Turkey	1999	7369	69880	1042	679	17_0_0_0_0_0_0_0_0_0_0	ERR349961
31817	989000407	The Netherlands	1998	11188	69881	1050	804	14_0_1_0_0_0_0_0_0_0_0	ERR349947
31835	999000049	Unknown		1590	876;16950;24038;48014;53887;53953	435	822	0_12_2_0_1_0_0_0_2_0_0	ERR388465
31836	999000020	Unknown		7371	727;16951;48015;52104;69890	306	823	0_8_1_0_1_0_0_0_0_0_0	ERR388468
31848	999000133	Unknown		11198	886;16959;24042;48018;52105;54008	432	672	0_13_2_2_0_0_0_0_0_0_0	ERR388462
31883	999000079	Unknown		12077	900;16981;24991;48023;52106;69906	434	867	40_0_0_0_0_0_0_0_0_0_0	ERR388464
31896	989000114	Indonesia	1998	1931	881;16994;48024	143	878	1_1_25_0_0_0_0_0_0_1_0	ERR388435
31906	590_319	Unknown		7367	69918	95	886	0_2_4_1_0_0_0_0_1_0_0	ERR388302
31942	BX2887	Unknown		11191	924;17023;48029;52109;69926	145	918	0_18_10_0_0_0_0_0_0_0_0	ERR449456
31946	BX596	Pakistan	2011	11228	9736;17027;48033	146	922	0_18_9_0_0_0_0_0_0_0_0	ERR449460
31949	BX3245	Unknown		11181	69930	1032	925	0_0_43_4_0_0_0_0_0_0_0	ERR449463
31950	BA4664	Unknown		12081	963;17031;41002;48036;52110;69931	470	926	39_0_0_0_0_0_0_0_0_0_0	ERR449464
31953	09_11	Vietnam	2011	1600	935;17034;41003;48038;54009	148	929	0_0_57_1_0_0_0_0_0_0_0	ERR449467
31956	05_227	Unknown		1920	69933	1051	932	0_0_50_0_0_0_0_0_0_1_0	ERR449470
31965	07_302	Unknown		7367	69937	95	941	0_2_4_1_5_0_0_0_0_0_0	ERR449479
31966	02_225	The Gambia	1989	11233	69938	1052	942	29_0_0_0_0_0_0_0_0_0_0	ERR449480
31967	02_227	South Africa	1990	1902	992;17041;48047	42	943	0_0_8_0_1_0_0_0_0_0_0	ERR449481
31968	02_228	South Africa	1991	11234	69939;80143	1053	944	1_7_1_0_0_0_0_0_0_0_0	ERR449482
31969	02_229	South Africa	1991	10899	69940	1054	945	0_0_32_0_0_0_0_0_0_0_0	ERR449483
31970	02_230	Tanzania	1992		996;17044;24996;48050;52113;54010;69941	441	946	34_0_0_1_0_0_0_0_0_0_0	ERR449484
31971	989000020	Cape Verde	1998	1583	998;17045;48051	475	947	0_2_14_0_0_0_0_0_0_0_0	ERR449485
31972	989000035	Cape Verde	1998	1931	69942	155	948	1_1_27_0_1_0_0_0_0_0_0	ERR449486
31973	989000005	The Gambia	1998	8139	954;17047;24050;48053;54011	156	949	0_12_5_0_0_0_0_0_1_0_0	ERR449487
31974	989000046	The Gambia	1998	8139	955;17048;24051;48054;54012	156	950	0_12_5_0_0_0_0_0_0_0_0	ERR449488
31975	989000266	The Gambia	1998	12080	999;17049;24052;48055;52114;54013	465	951	11_0_3_0_1_0_0_0_0_0_0	ERR449489
31976	989000418	Morocco	1998	1583	957;17050;48056;69943	90	952	0_2_7_2_0_0_0_0_0_0_0	ERR449490
31977	989000421	Morocco	1998	11235	958;17051;48057;54014	157	953	0_0_4_0_0_0_0_0_0_0_0	ERR449491
31978	989000016	Tanzania	1998	12082	1000;17052;48058;52115	476	954	1_4_0_0_0_0_0_0_0_0_0	ERR449492
31979	999000083	Uganda	1999	8142	1001;17053;48059;54015	477	955	1_1_32_0_0_0_0_0_0_0_0	ERR449493
31982	999000051	Guinea	1999	12083	1002;17054;48061;69946	478	958	0_2_56_0_0_0_0_0_0_0_0	ERR449496
31983	999000073	Morocco	1999	7363	1003;17055;24053;48062;69947	479	959	5_1_0_0_0_0_0_0_0_0_0	ERR449497
31986	08_590_00126	Guinea-Bissau	2007	1603	967;17058;24056;48065	156	962	0_12_5_0_1_0_0_0_0_0_0	ERR449500
31988	08_590_00128	Guinea-Bissau	2007	11236	69951	1056	964	1_1_38_0_1_0_0_0_0_0_0	ERR449502
31990	08_590_00130	Guinea-Bissau	2007	8112	69953	243	966	1_1_17_0_0_0_0_0_0_0_0	ERR449504
31991	08_590_00131	Guinea-Bissau	2007	8123	1005;17063;48070;54018	327	967	15_0_0_0_0_0_0_0_0_0_0	ERR449505
31992	08_590_00132	Guinea-Bissau	2007	11236	69954	1056	968	1_1_38_0_0_1_0_0_0_0_0	ERR449506
31994	08_590_00134	Guinea-Bissau	2007	11236	69956	1056	968	1_1_38_0_0_1_0_0_0_0_0	ERR449508
31995	08_590_00135	Guinea-Bissau	2007	11236	69957	1056	970	1_1_38_0_0_0_0_0_0_0_0	ERR449509
31996	08_590_00136	Guinea-Bissau	2007	11240	69958	1057	971	0_9_0_3_0_0_0_0_0_0_0	ERR449510
31997	08_590_00141	Guinea-Bissau	2007	11241	69959	1057	972	0_9_0_1_0_0_0_0_0_0_0	ERR449511
31998	08_590_00142	Guinea-Bissau	2007	8123	1011;17070;48077;54024	327	973	15_0_0_0_1_0_0_0_0_0_0	ERR449512
31999	08_590_00143	Guinea-Bissau	2007	8161	980;17071;48078;69960	166	974	1_1_36_0_0_0_0_0_0_0_0	ERR449513
32000	08_590_00144	Guinea-Bissau	2007	12084	1012;17072;48079;54025;69961	482	975	8_0_0_0_0_0_0_0_0_0_0	ERR449514
32001	08_590_00145	Guinea-Bissau	2007	1591	1013;17073;24061;48080;52116;54026;69962	445	976	11_0_1_1_0_0_0_0_0_0_0	ERR449515
32002	08_590_00146	Guinea-Bissau	2007	11242	69963	1057	977	0_9_0_2_0_0_0_0_0_0_0	ERR449516
32003	08_590_00147	Unknown		8161	984;17075;48082;69964	166	978	1_1_36_0_2_0_0_0_0_0_0	ERR449517
32004	08_590_00148	Unknown		11242	69965	1057	979	0_9_0_4_0_0_0_0_0_0_0	ERR449518
32007	08_590_00153	Guinea-Bissau	2007	8161	988;17079;48086;69968	166	982	1_1_36_0_1_0_0_0_0_0_0	ERR449521
32010	08_590_00157	Guinea-Bissau	2007	11244	69971	155	985	1_1_27_3_0_0_0_0_0_0_0	ERR449524
32011	08_590_00138_pg_r	Guinea-Bissau	2007	12084	1016;17083;48089;54029;69972	482	986	8_0_0_0_1_0_0_0_0_0_0	ERR449525
32012	08_590_00124	Unknown		11236	69973	1056	987	1_1_38_0_2_0_0_0_0_0_0	ERR449526
32013	08_590_00159	Unknown		11244	69974	155	988	1_1_27_3_0_0_0_0_0_0_0	ERR449527
32015	590_105	Unknown		12085	1019;17087;48092;52121;54031	484	990	36_0_0_0_0_0_0_0_0_0_0	ERR449529
32017	GC_10265	Unknown		7363	9751;17088;48093	327	992	15_0_0_1_0_0_0_0_0_0_0	ERR449532
32018	GC_10643	Unknown		1591	1020;17089;48094;52122;54032;69975	485	993	11_0_2_0_0_0_0_0_0_0_0	ERR449533
32019	GC_12463	Unknown		8392	1021;17090;24997;48095;52123;69976	486	994	37_0_0_1_0_0_0_0_0_0_0	ERR449535
32020	02_226	Unknown		11841	1022;17091;24998;69977	487	995	38_0_0_0_0_0_0_0_0_0_0	ERR449536
32021	989000246	Unknown		10899	1023;17092;53888	488	996	0_0_8_3_0_0_0_0_0_0_0	ERR449537
32028	02_232	Unknown		1892	69978	1059	1003	1_8_9_0_0_0_0_0_0_0_0	ERR449544
32030	DO29810	Denmark	1963	7365	1026;17095;48098;53889;69979	490	1004	35_0_0_0_2_0_0_0_0_0_0	ERR449546
32031	DO29811	Unknown		10931	1029;17096;24066;48099;53890	491	1005	0_12_7_1_1_0_0_0_0_0_0	ERR449547
32032	DO32188	Unknown		1892	1030;17097;24067;41005;48100;69980	492	1006	1_8_7_0_0_0_0_0_0_0_0	ERR449548
32033	DO32189	Unknown		1892	1031;17098;24068;41006;48101;69981	492	1007	1_8_7_0_0_0_0_0_0_0_0	ERR449549
32036	DO32692	Unknown		1595	1032;17099;24069;52125;80144	442	1009	42_0_0_0_0_0_0_0_0_0_0	ERR449552
32046	DO17769	Denmark	1965	11253	1033;17100;24070;24301;48102;52126;54033;69982	493	1010	49_1_0_0_0_0_0_0_0_0_0	ERR449564
32050	DO18273	Denmark	1940	11693	79904	1201	1011	47_0_1_0_0_0_0_0_0_0_0	ERR449569
32053	DO38932	Denmark	1941	11678	69984	1060	1012	1_8_1_0_1_0_0_0_0_0_0	ERR449573
32054	DO68169	Denmark	1967	1926	1036;17103;48105;53891;69985	410	1013	8_1_0_1_0_0_0_0_0_0_0	ERR449574
32057	DO27234	Denmark	1968	10931	1040;17106;48108;52128;53838;54035;69988	491	1016	0_12_7_3_0_0_0_0_0_0_0	ERR449577
32058	DO44229	Denmark	1968	11258	941;17107;24071;41008;48109;53892;53954;56444;69989	332	1017	46_0_0_0_0_0_0_0_0_0_0	ERR449578
32061	DO303	Denmark	1979	1927	69990	409	1018	0_12_0_0_0_0_0_0_0_0_0	ERR449581
32062	DO313	Denmark	1979	1601	1042;17109;48111;54037	496	1019	0_0_0_3_0_0_0_0_0_0_0	ERR449582
32064	DO427	Denmark	1979	1595	1048;17110;24072;48112;52129	442	1020	42_0_0_0_1_0_0_0_0_0_0	ERR449584
32069	DO462	Denmark	1979	1595	1054;17113;24075;48115;52131	442	1020	42_0_0_0_1_0_0_0_0_0_0	ERR449589
32071	DO45045	Denmark	1943	11253	1058;17114;24302;48116;52132;54038;69992	493	1023	49_1_0_0_0_2_0_0_0_1_0	ERR449591
32072	DO45046	Denmark	1943	11253	1059;17115;25316;48117;54039;69993	493	1024	49_1_0_0_0_2_0_0_0_0_0	ERR449592
32073	989000348	Unknown		11264	1027;48118;52133;54040;56445	183	1025	0_5_0_0_0_0_0_0_0_0_0	ERR485165
32074	989000093	Saudi Arabia	1998	7363	1028;17116;48119;53893;56446	184	1026	0_12_4_0_0_0_0_0_0_0_0	ERR485166
32076	02_231	UK	2002	1892	69994	1059	1003	1_8_9_0_0_0_0_0_0_0_0	ERR485168
32081	DO17810	Denmark	1940	11253	1064;17119;24303;48122;54041;69995	493	1031	49_1_0_0_0_0_0_0_0_1_0	ERR449565
34770	ATL_2011_01_03	USA	2011	10931	1070;17121;24077;56448	422	1034	0_12_9_3_4_0_0_0_0_0_0	SRR969360
34779	MIA_2011_03-09	USA	2011	1931	69999	1061	1043	1_1_2_25_0_0_0_0_0_0_0	SRR969369
34784	NOR_2011_03-06	USA	2011	1583	1050;17131;54042;70001	132	1047	0_2_38_0_0_0_0_0_0_0_0	SRR969374
34790	MU_NG6	Australia	2001	10934	1090;17134;24305;52135;54043;80145	441	1053	34_0_0_0_0_0_0_0_0_0_0	SRR969381
34797	MU_NG18	Norway	2010	10933	9768;17137;70003	187	1059	0_13_0_0_0_0_0_0_0_0_0	SRR969388
36251	63179	Kenya	2013	11367	1118;17154;54044	502	1079	0_2_55_0_0_0_0_0_0_0_0	ERR976912
36257	51960	Kenya	2012	1591	1125;17160;24083;49848;54045;70016	485	1085	11_0_2_2_0_0_0_0_0_0_0	ERR976917
36266	60096	Kenya	2012	11369	1139;17167	498	1092	0_16_0_3_0_0_0_0_0_0_0	ERR976921
36268	T060	Kenya	2013	1599	1144;17169;24306;25323;54046	499	1094	0_18_6_0_0_0_0_0_0_1_0	ERR976935
36270	59688	Kenya	2012	8133	70018	503	1096	0_0_36_0_1_0_0_0_0_0_0	ERR976923
36271	50659	Kenya	2011	6957	1182;17172;53894;53955	504	1097	0_16_1_2_0_0_0_0_0_0_0	ERR976924
36675	P9-17	UK	1973	1926	1294;17208;48126;53896;70040	407	1138	8_1_0_2_0_0_0_0_0_0_0	ERR977394
37049	GCGS0244	USA	2006	1590	70045	505	1174	10_0_0_0_6_0_0_0_0_0_0	ERR854909
37122	GCGS0292	USA	2006	10935	70058	1036	1246	1_1_4_1_0_0_0_0_0_0_0	ERR854977
37125	GCGS1076	USA	2007	11413	70060	198	1249	1_1_26_0_0_0_0_0_0_0_0	ERR854980
37142	GCGS0353	USA	2011	8149	1426;17263;48160;52139;70062	506	1266	5_2_0_4_5_0_0_0_0_0_0	ERR854997
37161	GCGS0370	USA	2011	1582	70068	1063	1285	0_0_41_1_1_0_0_0_0_0_0	ERR855016
37171	GCGS0449	USA	2011	11414	1524;17286;24093;25332;70073	507	1295	22_0_0_4_0_0_0_0_0_0_0	ERR855026
37190	GCGS0431	USA	2012	10316	1586;17304;24095;25336;48175;70080	507	1314	22_0_0_2_0_0_0_0_0_0_0	ERR855045
37191	GCGS0453	USA	2012	6962	70081	1026	1315	2_0_2_0_3_0_0_0_0_0_0	ERR855046
37192	GCGS0454	USA	2012	8149	1607;17306;48177;52142;70082	506	1316	5_2_0_4_2_0_0_0_0_0_0	ERR855047
37197	GCGS0471	USA	2012	11415	9821;17311;48181;52143;70085	204	1321	1_1_24_0_0_0_0_0_0_0_0	ERR855052
37200	GCGS0479	USA	2012	10931	1660;17314;24096;54050	422	1324	0_12_9_3_1_3_0_0_0_0_0	ERR855055
37203	GCGS0678	USA	2012	11184	1217;17317	335	1327	0_2_12_0_0_0_0_0_0_0_0	ERR855058
37205	GCGS0496	USA	2012	7828	1665;17319;48184;52145	510	1329	0_1_0_0_1_0_0_0_0_0_0	ERR855060
37213	GCGS0257	USA	2005	8149	1668;17324;48189;52147;70094	506	1337	5_2_0_4_3_0_0_0_0_0_0	ERR855068
37220	GCGS0556	USA	2005	1590	70096	505	1343	10_0_0_0_0_1_0_0_0_0_0	ERR855075
37231	GCGS0416	USA	2005	8126	1350;17332;48194	16	1352	0_2_1_0_26_0_0_0_0_0_0	ERR855082
37236	GCGS0297	USA	2005	7367	70100	95	1357	0_2_4_1_3_0_0_0_0_1_0	ERR855085
37276	GCGS1087	USA	2007	1901	1270	3	1396	0_2_0_1_157_0_0_0_0_3_0	ERR855124
37313	GCGS0250	USA	2005	8114	70113	44	1432	1_1_22_9_0_5_0_0_0_0_0	ERR855158
37327	GCGS0445	USA	2005	1590	70117	1065	1446	10_0_1_0_0_0_0_0_0_0_0	ERR855172
37340	GCGS0243	USA	2006	8114	70118	44	1459	1_1_22_9_0_1_0_0_0_0_0	ERR855185
37353	GCGS1028	USA	2007	1595	1700;17397;24097;52151;80158	442	1472	42_0_0_0_4_0_0_0_0_0_0	ERR855198
37357	GCGS1046	USA	2007	1932	9828;17401;48225	336	1476	0_8_2_0_0_0_0_0_0_0_0	ERR855202
37390	GCGS0154	USA	2009	8130	9830;17413	25	1508	0_0_26_12_0_0_0_0_0_0_0	ERR855235
37407	GCGS0517	USA	2011	1582	1522;17424;48239;52154;53840;70128	32	1524	0_0_41_2_1_0_0_0_0_0_0	ERR855252
37413	GCGS0714	USA	2011	7828	70129	1066	1530	0_0_52_0_1_0_0_0_0_0_0	ERR855258
37453	GCGS0486	USA	2010	1920	70133	418	1570	0_0_43_6_0_1_0_0_0_0_0	ERR855298
37492	GCGS0474	USA	2013	8149	1726;17462;48258;52156;70138	513	1607	5_2_1_0_0_0_0_0_0_0_0	ERR855337
39083	64579	Kenya	2014	11366	70152	501	1705	0_16_4_0_1_2_0_0_0_0_0	ERR1143659
39084	64605	Kenya	2014	1599	70153	37	1706	0_0_47_10_1_0_0_0_0_0_0	ERR1143660
39086	64586	Kenya	2014	11366	1741;17509;49854;52159;54053;70154	501	1708	0_16_4_0_8_0_0_0_0_0_0	ERR1143662
39095	65737	Kenya	2014	11366	1750;17518;49858;52162;70161	501	1715	0_16_4_0_2_0_0_0_0_0_0	ERR1143671
39098	56682	Kenya	2012	1931	70164	1067	1718	1_1_29_0_1_0_0_0_0_0_0	ERR1143674
39100	57568	Kenya	2012	1903	70165	37	1720	0_0_47_5_6_0_0_0_0_1_0	ERR1143676
39104	45722	Kenya	2010	1599	1757;17525;25367;54054	499	1722	0_18_6_1_0_0_0_0_0_0_0	ERR1143684
39105	44941	Kenya	2010	1599	1758;17526;25368;54055	499	1723	0_18_6_1_1_0_0_0_0_0_0	ERR1143691
39106	45388	Kenya	2010	12242	1760;17527;52164;53841;54056;70166	504	1724	0_16_1_0_0_0_0_0_0_0_0	ERR1143693
39116	46745	Kenya	2011	1893	1769;17537;25374	498	1732	0_16_0_2_6_0_0_0_0_0_0	ERR1143681
39118	47954	Kenya	2011	1599	1773;17539;25375;54057	499	1088;1090	0_18_6_1_0_0_0_0_0_1_0	ERR1143685
39119	47547	Kenya	2011	1583	70173	1068	1734	0_2_42_0_0_0_0_0_0_0_0	ERR1143686
39121	48183	Kenya	2011	12243	1780;17542;52165;53842;54058	504	1736	0_16_1_1_0_0_0_0_0_0_0	ERR1143688
39122	48763	Kenya	2011	1903	70174	37	1737	0_0_47_15_0_0_0_0_0_0_0	ERR1143689
39123	48437	Kenya	2011	1931	70175	1067	1738	1_1_29_0_0_0_0_0_0_0_0	ERR1143690
39124	48563	Kenya	2011	1599	1782;17544;25377;54059	499	1088;1090	0_18_6_1_0_0_0_0_0_1_0	ERR1143692
39127	48502	Kenya	2011	1599	1786;17547;25379;54060	499	1088;1090	0_18_6_1_0_0_0_0_0_1_0	ERR1143697
39128	48406	Kenya	2011	1599	1069;17142;17548;17549;24082;53898;56453;70007;70176	188	1067;1740	1_1_11_1_0_0_0_0_0_0_0	ERR1143698
39129	50040	Kenya	2011	1599	1069;17142;17548;17549;24082;53898;56453;70007;70176	188	1067;1740	1_1_11_1_0_0_0_0_0_0_0	ERR1143699
39131	49676	Kenya	2011	1599	1747;17551;25380;53899;70177	188	1742	1_1_11_1_0_0_0_0_0_1_0	ERR1143701
39132	49719	Kenya	2011	1893	1788;17552	498	1743	0_16_0_2_2_1_0_0_1_0_0	ERR1143703
39133	50869	Kenya	2011	8120	9866;17553;25381;70178	338	1744	1_1_12_0_0_0_0_0_0_0_0	ERR1143705
39134	51751	Kenya	2011	1893	1792;17554	498	1071;1745	0_16_0_1_5_0_0_0_0_0_0	ERR1143707
39137	65907	Kenya	2015	1599	70179	1069	1747	16_0_0_0_0_0_0_0_0_0_0	ERR1143710
45012	EXNG204	Australia	2011	7363	1912;17644;48280;53900;53962;70198	521	1850	0_2_44_3_2_0_0_0_0_0_0
45015	EXNG206	Australia	2011	7363	1913;17645;48281;53901;53963;70199	521	1851	0_2_44_3_2_0_1_0_0_0_0
45017	EXNG210	Australia	2011	12040	70200	523	1853	0_2_44_1_2_0_0_0_0_1_0
45019	EXNG219	Australia	2011	7363	1923;17649;48285;53903;53964;70202	521	1855	0_2_44_3_2_0_0_0_0_0_0
45021	EXNG225	Australia	2011	12045	70204	1071	1857	0_2_45_2_5_0_0_0_0_0_0
45022	EXNG226	Australia	2011	8145	1884;17652;48288;70205	234	1858	0_2_60_0_3_0_0_0_0_0_0
45027	EXNG239	Australia	2012	7363	1932;17653;25417;48289;53904;53965;70206	521	1859	0_2_44_4_0_0_0_0_0_0_0
45030	EXNG230	Australia	2011	12042	1937;17655;38534;48291;52171;54061	522	1861	0_16_6_0_0_0_1_0_1_0_0
45032	EXNG301	Australia	2013	12041	1941;17656;48293;52172;70208	524	1863	5_2_3_1_0_0_0_0_0_0_0
45033	EXNG305	Australia	2013	12046	70209	1071	1864	0_2_45_0_0_0_0_1_0_0_0
45045	EXNG288	Australia	2013	12042	1955;17667;38535;48301;52175;54062	522	1876	0_16_6_0_0_0_1_1_0_0_0
45046	EXNG217	Australia	2011	12045	70214	1071	1877	0_2_45_2_0_0_0_0_0_0_0
45048	EXNG224	Australia	2011	12040	70216	523	1879	0_2_44_1_0_0_0_1_0_0_0
45050	EXNG235	Australia	2012	1924	9883;17672;25419;48305	227	1881	0_18_4_0_0_0_0_0_0_0_0
45055	EXNG254	Australia	2012	7363	70221	1072	1886	0_2_44_0_0_0_0_0_0_0_0
45056	EXNG259	Australia	2012	12040	70222	523	1887	0_2_44_1_2_1_0_0_0_0_0
45058	EXNG264	Australia	2012	12042	1989;17680;38538;48312;52178;54063	522	1889	0_16_6_0_0_0_1_0_0_2_0
45059	EXNG266	Australia	2012	7363	1990;17681;48313;53908;70223	521	1890	0_2_44_3_12_0_0_0_0_0_0
45060	EXNG271	Australia	2013	12042	1991;17682;38539;48314;52179;54064	522	1891	0_16_6_0_0_0_1_0_0_3_0
45061	EXNG272	Australia	2013	7363	70224	1072	1892	0_2_44_0_0_0_0_0_0_0_0
45062	EXNG277	Australia	2013	12044	70225	1073	1893	0_2_46_0_0_0_0_0_0_0_0
45063	EXNG278	Australia	2013	12046	70226	1071	1894	0_2_45_1_0_0_0_0_0_0_0
45064	EXNG282	Australia	2013	12045	70227	1071	1895	0_2_45_2_3_0_0_0_0_0_0
45067	EXNG290	Australia	2011	12046	70230	1071	1898	0_2_45_0_0_0_0_1_0_1_0
45070	EXNG296	Australia	2013	12042	2013;17692;38541;48323;52181;54065	522	1901	0_16_6_0_0_0_1_0_0_4_0
45074	EXNG314	Australia	2013	12042	2014;17696;48325;54066	522	1905	0_16_6_1_0_0_0_0_0_0_0
45330	EXNG322	Australia	2013	8149	2017;17698;48326;52183;70233	527	1907	5_2_2_0_0_0_0_0_0_0_0
46275	FA19	USA	1962	1892	2067;17708;56528;70242	405	1919	1_8_2_0_0_0_0_0_0_0_0
46276	FA6140	USA	1983	1927	70243	409	1920	0_12_0_0_2_0_0_0_0_0_0
46278	SRR515980	USA	1960	6959	2076;17711;54068	406	1922	0_0_0_0_0_0_0_0_0_2_0	SRR515980
46848	521175	Norway	2015	7822	1811;17721;48328;53910	133	1937	0_2_9_28_0_2_0_0_0_0_0	ERR3325211
46853	523392	Norway	2015	12459	1958;17726;48330;52191;70251	241	1942	0_19_0_0_0_0_0_0_0_0_0	ERR3325212
46910	529785	Norway	2016	8774	70272	1074	1996	0_0_34_0_0_0_0_0_0_0_0	ERR3325232
46926	535699	Norway	2016	8136	70277	1075	2010	0_0_18_22_0_0_0_0_0_0_0	ERR3325264
46933	ECDC_1820984	Iceland	2013	11979	2177;17792;25443;48352	531	2017	0_0_20_0_0_0_0_0_0_0_0	ERR1549757
46936	538826	Norway	2016	12463	70280	1076	2020	0_0_29_3_1_0_0_0_0_0_0	ERR3325283
46939	534452	Norway	2016	14332	2035;17797;48356	96	2023	0_18_8_1_6_0_0_0_0_0_0	ERR3325261
46940	536169	Norway	2016	10316	70281	1077	2024	1_1_31_0_1_0_0_0_0_0_0	ERR3325266
46949	534206	Norway	2016	10316	70286	1077	2033	1_1_31_0_0_0_0_0_0_0_0	ERR3325248
46953	536292	Norway	2016	10634	2197;17806;38543;48366;70288	532	2037	2_0_1_0_0_0_0_0_0_0_0	ERR3325268
46955	534219	Norway	2016	11750	70289	1079	2039	1_1_33_0_0_0_0_0_0_0_0	ERR3325250
46958	537159	Norway	2016	1600	2199;17811	533	2042	0_0_46_1_0_1_0_0_0_0_0	ERR3325275
46960	534235	Norway	2016	11750	70290	1079	2044	1_1_33_0_1_0_0_0_0_0_0	ERR3325251
46962	539460	Norway	2016	1579	1906;25447	344	2046	0_2_5_0_0_0_0_0_0_0_0	ERR3325287
47028	GNCWGS_04AV_95	China	2014	7827	2063;17819	219	2051	0_2_53_2_28_0_0_0_0_0_0	SRR4011641
47029	GNCWGS_04CD	China	2013		2064;17820;54072	258	2052	0_0_58_1_1_0_0_0_0_1_0	SRR4011646
47030	GNCWGS_05OP	China	2013	11969	2065;17821;70293	259	2053;9137	0_2_0_38_0_0_0_0_0_0_0	SRR4011647
47031	GNCWGS_061Z	China	2013	1583	1915;54073;70294	345	2054	0_2_49_1_0_1_0_0_0_0_0	SRR4011648
47035	GNCWGS_07AD_68	China	2013	7365	70296	1080	2058	0_2_51_0_0_0_0_0_0_0_0	SRR4011652
47036	GNCWGS_07AG_69	China	2013	7365	70297	1080	2059	0_2_51_0_0_0_0_0_0_1_0	SRR4011631
47039	GNCWGS_037L_77	China	2013	1902	2074;17826	264	2062	0_0_13_0_0_0_0_0_0_0_0	SRR4011634
47044	GNCWGS_07M2_73	China	2013	7371	1927;70301	34	2067	0_2_16_1_1_0_0_0_0_2_0	SRR4011639
47361	SRR3343487	UK		1899	2223;17840	404	2084	6_0_1_0_0_0_0_0_0_0_0	SRR3343487
47393	SRR3343519	UK [England]	2013	11249	6800;17855;25454;48373;52200;53843	236	2114	0_18_1_2_0_0_0_0_0_0_0	SRR3343519
47413	SRR3343539	UK [England]	2013	12467	2258;17869;24133;48374;70330	535	2131	1_11_0_0_0_1_0_0_0_0_0	SRR3343539
47423	SRR3343549	UK		1899	2277;17876	404	2139;2218	6_0_1_0_0_0_0_0_0_0_0	SRR3343549
47426	SRR3343552	UK		1899	2278;17878	404	2084;2139;2142;2200;2218;2230;26322	6_0_1_0_0_0_0_0_0_0_0	SRR3343552
47438	SRR3343564	UK [England]	2013	8122	70342	446	2153	19_0_1_0_0_14_0_0_3_1_0	SRR3343564
47457	SRR3343584	UK		1899	2316;17899	404	2084;2139;2142;2200;2218;2230	6_0_1_0_0_0_0_0_0_0_0	SRR3343584
47596	SRR3349197	UK [England]	2013	12500	70411	1063	2285	0_0_41_1_0_0_0_0_0_0_0	SRR3349197
47650	SRR3349251	UK [England]	2013	1893	70439	31	2334	0_2_29_2_3_0_2_0_0_4_0	SRR3349251
47752	SRR3349520	UK [England]	2014	1893	70490	31	2426	0_2_29_2_3_0_2_0_0_3_0	SRR3349520
47771	SRR3349540	UK [England]	2014	1902	2633;18050	537	2445	0_0_9_0_0_0_0_0_0_0_0	SRR3349540
47777	SRR3349547	UK [England]	2014	8122	70499	446	2451	19_0_1_0_0_14_0_0_2_24_0	SRR3349547
47787	SRR3349558	UK [England]	2014	1584	70502	41	2460	1_1_2_0_15_0_0_1_0_6_0	SRR3349558
47797	SRR3349568	UK [England]	2014	1583	2661;18067	538	2450;2470;2576	0_2_21_0_0_0_1_0_0_0_0	SRR3349568
47896	SRR3349677	UK [England]	2014	1587	2391;18127	239	2564	0_7_0_4_1_0_0_0_0_0_0	SRR3349677
47933	SRR3349716	UK [England]	2014	12501	6803;18144	263	2598	0_2_23_1_2_0_0_0_0_0_0	SRR3349716
48004	SRR3349869	UK [England]	2011	10931	2876;18176	422	2668	0_12_9_1_0_0_0_0_0_2_0	SRR3349869
48007	SRR3349872	UK [England]	2012	8163	2886;18178;70580	439	2671	5_2_0_2_0_0_0_0_0_0_0	SRR3349872
48009	SRR3349874	UK [England]	2011	10931	2898;18179	422	2673	0_12_9_1_0_0_0_0_0_0_0	SRR3349874
48033	SRR3349898	UK [England]	2011	7363	70588	196	2694	0_0_52_1_1_0_0_0_2_2_0	SRR3349898
48034	SRR3349899	UK [England]	2012	1902	2938;18196	42	2695	0_0_8_1_6_0_0_0_0_0_0	SRR3349899
48054	SRR3349919	UK [England]	2011	8123	2758;18205	271	2714	0_2_35_0_0_0_0_0_0_0_0	SRR3349919
48163	SRR3350100	UK [England]	2014	8122	70625	446	2815	19_0_1_0_0_14_0_0_2_17_0	SRR3350100
48164	SRR3350101	UK [England]	2014	11956	70626	222	2816	0_0_30_0_2_0_0_1_0_0_0	SRR3350101
48188	SRR3350125	UK [England]	2014	1584	70639	41	2839	1_1_2_0_15_1_0_0_0_0_0	SRR3350125
48195	SRR3350132	UK [England]	2014	8130	70643	222	2846	0_0_30_0_1_0_0_0_0_0_0	SRR3350132
48227	SRR3350164	UK [England]	2014	11979	3150;18287;25510	531	2877	0_0_20_0_0_0_0_0_0_1_0	SRR3350164
48243	SRR3350180	UK [England]	2014	7827	3171;18293	539	2893	0_0_33_64_0_0_0_0_0_0_0	SRR3350180
48268	SRR3350206	UK [England]	2014	11956	70685	222	2917	0_0_30_0_2_0_0_0_0_1_0	SRR3350206
48293	SRR3350231	UK [England]	2014	1584	70698	41	2942	1_1_2_0_15_0_3_0_0_4_0	SRR3350231
48310	SRR3350248	UK [England]	2014	7822	2997;18330;25513	133	2957	0_2_9_14_11_0_5_0_0_0_0	SRR3350248
48351	SRR3357014	UK [England]	2011	12504	70726	1082	2995	0_2_66_0_0_0_0_0_0_0_0	SRR3357014
48370	SRR3357036	UK [England]	2015	11231	10014;18357	149	3012	0_2_64_1_1_1_0_0_0_0_0	SRR3357036
48423	SRR3357161	UK [England]	2014	8122	70746	446	3061	19_0_1_0_0_14_0_0_2_20_0	SRR3357161
48488	SRR3357260	UK [England]	2011	1596	9510;24163;70761	450	3112	1_12_0_0_2_0_2_0_0_0_0	SRR3357260
48560	SRR3360299	UK [England]	2010	11990	3271;18411	414	3172	1_8_5_0_54_6_0_0_0_0_0	SRR3360299
48644	SRR3360630	UK [England]	2009	1931	70780	1083	3227	1_1_14_0_0_0_0_0_0_0_0	SRR3360630
48666	SRR3360652	UK [England]	2009	11191	3250	96	3249	0_18_8_0_0_1_0_0_0_0_0	SRR3360652
48667	SRR3360653	UK [England]	2007	1579	70785	24	3250	0_0_43_1_0_7_1_0_0_0_0	SRR3360653
48701	SRR3360687	UK [England]	2007	1892	3413;18473;48382;54076;70799;79338	540	3281	1_8_4_0_0_0_0_0_0_0_0	SRR3360687
48727	SRR3360713	UK [England]	2010	8775	70810	1082	3307	0_2_66_0_1_0_0_0_0_0_0	SRR3360713
48741	SRR3360727	UK [England]	2010	10622	3451;18494;48388;70817	528	3321	0_20_3_0_0_0_0_0_0_0_0	SRR3360727
48745	SRR3360731	UK [England]	2010	1901	10050;18496	3	3325	0_2_0_1_0_64_1_0_0_0_0	SRR3360731
48789	SRR3360821	UK		10934	3494;18520;25539;52211;54077;80197	441	3365	34_0_0_0_0_0_0_0_0_0_0	SRR3360821
48794	SRR3360826	UK [England]	2013	12507	3500;18525;52212;70832	439	3370	5_2_0_1_23_0_0_0_0_0_0	SRR3360826
48796	SRR3360828	UK		1599	70834	1041	3372	0_2_31_0_0_0_0_0_0_1_0	SRR3360828
48799	SRR3360831	UK [England]	2013	8112	70837	243	3375	1_1_17_0_3_0_0_0_0_0_0	SRR3360831
48804	SRR3360836	UK [England]	2004	8148	70839	1049	3380	5_0_0_0_0_0_0_0_1_0_0	SRR3360836
48806	SRR3360838	UK		11987	14810;25543;48398;70840	576	3382	20_0_0_0_0_0_0_0_0_0_0	SRR3360838
48816	SRR3360848	UK		1903	3387;18542;24158;70846	64	3392	0_2_37_0_0_0_0_0_0_0_0	SRR3360848
48824	SRR3360856	UK		7367	3394	95	3399	0_2_4_0_0_0_0_0_0_0_0	SRR3360856
48840	SRR3360872	UK [England]	2004	8392	3556;18555;48404;52213;70853	486	3415	37_0_0_0_0_0_0_0_0_0_0	SRR3360872
48844	SRR3360876	UK [England]	2004	8148	70855	1049	3419	5_0_0_0_0_0_0_0_0_0_0	SRR3360876
48851	SRR3360883	UK [England]	2004	1587	3420;18561;54081	208	3426	0_2_36_3_1_0_0_0_0_0_0	SRR3360883
48858	SRR3360890	UK [England]	2005	1892	70858	1059	3432	1_8_9_0_1_0_0_0_0_0_0	SRR3360890
48866	SRR3360898	UK		10682	3582;18574;48410;53911;70862	410	3440	8_1_0_0_1_0_0_0_0_0_0	SRR3360898
48868	SRR3360900	UK		1902	70864	1023	3442	0_0_7_2_0_0_0_0_0_1_0	SRR3360900
48881	SRR3360914	UK [England]	2012	9363	3276	16	3455	0_2_1_0_73_46_0_0_3_0_0	SRR3360914
48884	SRR3360917	UK [England]	2004	1904	3609;18584;52217	510	3458	0_1_0_0_0_0_0_0_0_0_0	SRR3360917
48885	SRR3360918	UK [England]	2012	1596	3611;18585;24147;70869	450	3367;3459;3634	1_12_0_0_2_2_0_0_0_0_0	SRR3360918
48888	SRR3360921	UK [England]	2004	7367	70871	95	3462	0_2_4_1_2_0_0_0_0_0_0	SRR3360921
48897	SRR3360931	UK		10934	3612;18593;25554;52218;54082;70874;79340	441	3365;3471	34_0_0_0_0_0_0_0_0_0_0	SRR3360931
48900	SRR3360934	UK		1590	3617;18595;25555;41022;48417;53912;53956	435	735;3474	0_12_2_0_2_0_0_1_0_0_0	SRR3360934
48902	SRR3360936	UK [England]	2004	8392	3619;18596;48419;52219;70876	486	3476	37_0_0_0_0_0_0_0_0_0_0	SRR3360936
48904	SRR3360938	UK		1583	3472;18598;54083;70877	132	3477	0_2_38_0_0_0_0_0_0_0_0	SRR3360938
48906	SRR3360940	UK [England]	2013	7363	70879	196	3479	0_0_52_1_25_0_0_0_0_0_0	SRR3360940
48926	SRR3360961	UK [England]	2013		70887	446	3499	19_0_1_0_0_14_0_0_2_6_0	SRR3360961
48929	SRR3360964	UK [England]	2004	8122	70888	446	3502	19_0_1_0_0_5_0_0_0_0_0	SRR3360964
48932	SRR3360967	UK [England]	2004	8392	3659;18617;48427;52224;70890	486	3505	37_0_0_0_0_0_0_0_1_0_0	SRR3360967
48934	SRR3360969	UK [England]	2013	11191	3661;18619;25561;48428	124	3507	0_18_7_0_10_0_0_0_0_0_0	SRR3360969
48937	SRR3360972	UK [England]	2013	11990	3665;18622	414	3510	1_8_5_0_52_4_0_0_0_0_0	SRR3360972
48947	SRR3360982	UK [England]	2004	6960	3679;18630;25564;48432;53913	541	3520	0_16_2_0_0_0_0_0_0_0_0	SRR3360982
48953	SRR3360988	UK		11075	3688;18635;53914	517	3525	0_12_7_4_0_0_0_0_0_0_0	SRR3360988
48956	SRR3360991	UK [England]	2004	8392	3689;18637;48434;52227;70903	486	3528	37_0_0_0_0_0_0_0_0_0_0	SRR3360991
49015	SRR3361126	UK [England]	2012	1902	3742;18662	42	3584;3592	0_0_8_1_6_0_0_0_1_0_0	SRR3361126
49067	SRR3361180	UK [England]	2012	1596	70935;80201	450	3631	1_12_0_0_12_0_0_0_0_0_0	SRR3361180
49213	SRR3361352	UK [England]	2007	1931	70988	155	3754	1_1_27_1_0_0_0_0_0_0_0	SRR3361352
49218	SRR3361357	UK [England]	2009	11191	3775	96	3249;3759	0_18_8_0_0_1_0_0_0_0_0	SRR3361357
50500	544362	Norway	2016	11516	71001	516	3788	0_18_13_0_14_0_0_0_0_0_0	ERR3325314
51661	552837	Norway	2017	11367	4024;18818;48480	542	3827	0_2_54_0_0_0_0_0_0_0_0	ERR3325360
51730	553597	Norway	2017	1894	71046	516	3893	0_18_13_0_7_0_0_0_0_0_0	ERR3325383
51745	553711	Norway	2017	11189	3930;18882;48508;52246;71053	280	3906	0_20_7_0_0_0_0_0_0_0_0	ERR3325398
51766	554565	Norway	2017	8784	4130;18902;25796;48512	416	3925	0_0_18_7_8_0_0_0_0_0_0	ERR3325425
51770	554586	Norway	2017	13309	10141;18906;25797;48513;71061	62	3928	0_0_26_14_0_0_0_0_0_0_0	ERR3325429
51773	554621	Norway	2017	1929	4144;18909;25798;38554;48515	543	3931	1_1_37_0_0_0_0_0_0_0_0	ERR3325433
51780	554653	Norway	2017	7827	3965;18914	219	3936	0_2_53_2_51_2_3_2_0_0_0	ERR3325440
51782	554674	Norway	2017	1600	4156;18916	533	3938	0_0_46_1_0_0_0_0_0_0_0	ERR3325441
51811	557753	Norway	2017	1584	71081	41	3958	1_1_2_0_53_1_0_0_1_4_0	ERR3325529
51813	558222	Norway	2017	12463	71083	1076	3960	0_0_29_3_0_0_0_0_0_0_0	ERR3325530
52156	552580	Norway	2017	11189	4031;18967;48531;52248;71101	280	3991	0_20_7_0_0_1_0_0_0_0_0	ERR3325347
52753	Ng01-34	Australia		8775	4273;18979;25818;80215	528	4004	0_20_3_1_1_0_0_0_0_0_0
52757	Ng23-57	Australia		8141	4282;18983;25819	528	4008	0_20_3_1_2_0_0_0_0_0_0
52759	Ng38-58	Australia		8775	4291;18985;25821;71113;79342	528	4010	0_20_3_1_0_1_0_0_0_0_0
52761	Ng41-41	Australia		12906	4299;18987;53915;53966;71115	521	4012	0_2_44_3_0_1_0_0_0_0_0
52762	Ng41-67	Australia		8775	4302;18988;25822;52250;53845;71116;79343	528	4013	0_20_3_1_0_0_0_0_0_0_0
52764	Ng47-54	Australia		12040	71118	523	4015	0_2_44_1_5_2_0_0_0_0_0
52765	Ng50-32	Australia		12040	71119	523	4016	0_2_44_1_5_1_0_0_0_0_0
52766	Ng51-55	Australia		12040	71120	523	4017	0_2_44_1_4_0_0_0_0_0_0
53540	515386	Norway	2016	11431	4356;25834;48542;54085;56681	544	4040	0_0_27_3_0_0_0_0_0_0_0	ERR3325187
53561	561285	Norway	2017	11431	4367;25839;52252;71139	545	4053	0_0_40_0_0_0_0_0_0_0_0	ERR3325552
53563	561738	Norway	2017	8130	4368;19020;25841;48545;80221	546	4055	0_0_29_2_0_0_0_0_0_0_0	ERR3325556
53596	567385	Norway	2017	1931	71150	1085	4079	1_1_2_24_0_0_0_0_0_0_0	ERR3325658
53600	568533	Norway	2017	7360	9016;25852;45203;54086;56696	346			ERR3325664
56128	567322	Norway	2017	14343	4539;19195;25960;38584;56752	278	4297	0_18_15_0_0_0_0_0_0_0_0	ERR3325648
56177	573969	Norway	2017	14345	4652;19229;25977;48661;50406;56762;71245;79351	546	4338	0_0_29_2_0_1_0_0_0_0_0	ERR3325740
56183	573718	Norway	2017	12463	71248	1076	4344	0_0_29_3_2_0_0_0_0_0_0	ERR3325738
56192	574837	Norway	2017	1599	71254	243	4353	1_1_17_6_19_0_0_0_0_0_0	ERR3325751
56421	037F	China	2013	1902	4440;19316	264	4446	0_0_13_0_0_0_0_0_0_0_0
57163	NG76	Spain	2016	13149	14811;26068;38629;45232;48719;56815;71330	535	4518	1_11_0_1_1_0_0_0_0_0_0
60436	KNY_NGAMR/1	Kenya	2014	13613	12405;26074;48724;52293;53847;54087;71339;79353	485	4535	11_0_2_1_0_0_0_0_0_0_0
60437	KNY_NGAMR9p	Kenya	2016	14300	4877;19405;26075;48725;50411;54088;71340	502	4536	0_2_55_2_0_0_0_0_0_0_0
60442	KNY_NGAMR33	Kenya	2016	13764	112288	213	4538;31841	1_1_34_0_2_0_0_0_0_0_0	SRR7534689
60501	KNY_NGAMR2	Kenya	2014	1928	71345	1086	4562	4_0_1_0_0_0_0_0_0_0_0
60502	KNY_NGAMR3	Kenya	2014	1893	4893;19429;38647;50416;71346	498	4563	0_16_0_1_10_0_0_0_0_0_0
60505	KNY_NGAMR6	Kenya	2015	11367	4915;19432;26099;54089;56836	502	4566	0_2_55_0_1_0_0_0_0_0_0	SRR7534672
60506	KNY_NGAMR7	Kenya	2015	11366	4917;19433;26100;48738;50417;52305;54090;71349	501	4567	0_16_4_0_0_0_0_0_0_0_0
60530	KNY_NGAMR53	Kenya	2018	11750	10255;19446;48752;50431;54091;56846;71362;79364	213	4582	1_1_34_1_0_0_0_0_0_0_0	SRR7534681
61061	598593	Norway	2017	1597	4935;19461;26122;48757	548	4603	0_0_18_24_0_0_0_0_0_0_0	ERR3326015
61062	598596	Norway	2017	1597	4936;19462;26123;48758	548	4603	0_0_18_24_0_0_0_0_0_0_0	ERR3326016
61337	999000103	Lithuania	1999	1601	4940;19484;26136;38879;48766;52312;80271	426	4628	0_0_0_1_0_0_0_0_0_0_0	ERR349955
61341	999000097	Turkey	1999	8112	71384	1087	4630	1_1_16_0_0_0_0_0_0_0_0	ERR349960
61354	IN_09_3830	India	2009	8775	4941;19491;26141;54094;71388	459	4636	0_20_0_0_0_0_0_0_0_0_0	ERR363635
61381	989000041	Philippines	1998	1583	10262;19493;48772;80272	389	4639	0_2_20_0_0_0_0_0_1_0_0	ERR352799
61623	GU027	Japan	2015	7363	4800;19497	290	4642	0_2_28_0_0_0_0_0_0_0_0	DRR117953
61624	GU033	Japan	2015	7363	4801;19498	290	4643	0_2_28_0_0_2_0_0_0_0_0	DRR117954
61630	GU155	Japan	2015	7363	4802;19501	290	4649	0_2_28_0_0_0_0_0_0_0_0	DRR117960
61646	GU442	Japan	2015	7363	4811;19507	8	4665	0_2_17_1_0_0_0_0_0_0_0	DRR117976
61651	GU483	Japan	2015	7363	4814;19511	290	4670	0_2_28_0_0_0_0_0_1_0_0	DRR117981
61734	FC490	Japan	2015	13842	71399	1066	4739	0_0_52_0_1_1_0_0_0_1_0	DRR124755
61736	FC492	Japan	2015	7363	4617	8	4740	0_2_17_0_20_4_0_0_1_0_0	DRR124757
61761	FC517	Japan	2015	7827	4637;19568	290	4759	0_2_28_0_2_0_0_0_0_1_0	DRR124782
61762	FC518	Japan	2015	7827	4841;19569	290	4760	0_2_28_0_2_0_0_0_0_0_0	DRR124783
61779	FC535	Japan	2015	13842	71409	1066	4772	0_0_52_0_1_1_0_0_0_0_0	DRR124800
61789	HI55	Japan	2015	7358	9017;48805;52334;54095;56881	208			DRR124810
61831	KM272	Japan	2015	7358	10819;52337;54096;56889	208			DRR124852
62968	WHO F	Canada	1991	10934	1090;17134;19643;24305;26221;52135;52342;54043;54097;80145;80284	441	328;551;1053;3365;3471;4864	34_0_0_0_0_0_0_0_0_0_0	ERR1447929
74477	RYC67	Spain		16388	5316;19848;27015;48889;52386;71564	31	5107	0_2_29_13_0_0_0_0_0_0_0	SRR15412784
74525	HVH732	Spain		7363	10288;19892;27043;39005	8	5151	0_2_17_0_17_0_1_0_0_0_0	SRR15441612
74541	HVH1179	Spain		7363	6924;19908;39011;52392	8	5167	0_2_17_0_9_0_3_3_2_0_0	SRR15441594
75584	FQ35	USA	2014	13149	14815;27056;46337;48903;71583;79376	535			SRR8457070
75957	NG_AMS0050	The Netherlands	2014	6720	7657;19963;54098;71597	359	5225	1_1_6_0_0_0_0_0_0_0_0
75977	NG_AMS0070	The Netherlands	2015	15571	7011;19983	62	5245	0_0_26_3_36_0_0_0_0_0_0
75988	NG_AMS0081	The Netherlands	2015	11251	71610	549	5255	0_0_42_0_1_0_0_0_0_0_0
76025	NG_AMS0118	The Netherlands	2016	11431	5433;20031;52398	545	5292	0_0_40_0_1_0_0_0_0_0_0
76038	NG_AMS0131	The Netherlands	2017	15572	7659;20044;57027;71630	360	5304	20_0_1_0_0_0_0_0_0_0_0
76059	NG_AMS0152	The Netherlands	2017	1588	5449;20064;54099	21	5324	0_0_33_12_34_0_0_0_0_0_0
76077	NG_AMS0178	The Netherlands	2018	8163	5456;20082;71641	439	5342	5_2_0_1_22_1_0_0_0_0_0
76109	NG_AMS0218	The Netherlands	2018	15573	10305;20113;39019	16	5372	0_2_1_0_73_94_0_0_0_0_0
76128	NG_AMS0240	The Netherlands	2018	11208	12436	368	5391	0_0_26_15_0_0_0_0_0_0_0
76141	NG_AMS0259	The Netherlands	2019	15574	71671	1092	5404	1_1_28_0_0_0_0_0_0_0_0
76230	NG_AMS0321	The Netherlands	2010	8114	71687	44	5487	1_1_22_9_0_8_0_0_0_0_0
76386	595640	Norway	2017	1893	71738	31	5620	0_2_29_2_3_3_0_0_1_1_0	ERR3325963
76411	596551	Norway	2017	8776	71746	1093	5640	0_18_2_0_0_0_0_0_0_0_0	ERR3325990
76446	600006	Norway	2017	11516	71751	516	5659	0_18_13_0_12_0_0_0_0_0_0	ERR3326037
76511	609602	Norway	2017	8776	7683;20392;27150;39062;48958;52417;53849	354	5700	0_18_0_0_0_0_0_0_0_0_0	ERR3326123
78366	AU2012-572	Australia	2012	7359	5998;20496;71799;79387	223	5811	1_8_6_0_2_0_0_0_0_14_0	SRR5801803
78375	AU2012-649	Australia	2012	7359	6012;20504;27209	223	5819	1_8_6_0_2_0_0_0_0_1_0	SRR5801811
78407	AU2014-637	Australia	2014	7359	6100;20535;57149	223	5851	1_8_6_0_2_0_0_0_11_0_0	SRR5801857
78480	15363	Canada	1994	11421	6143;20597;48979;52432;53850;54100;71807	409	5919	0_12_0_1_0_0_0_0_0_0_0	SRR1661153
78481	18438	Canada	1996	1600	6145;20598;27268;39127;46348;48980;71808	550	5920	0_0_10_0_0_0_0_0_0_0_0	SRR1661154
78483	19984	Canada	1997	1904	6151;20600;27270;48981;52433	432	5922	0_13_2_0_0_0_0_0_0_0_0	SRR1661156
78490	23712	Canada	2001	12524	79923	1202	5926	0_2_1_10_0_0_0_0_0_0_0	SRR1661163
78492	23836	Canada	2001	1587	7855;20605;54101	208	5928	0_2_36_3_3_0_0_0_0_0_0	SRR1661165
78497	26932	Canada	2005	1594	6156;20608;27273;48986	414	5930	1_8_5_0_26_0_0_0_0_0_0	SRR1661171
78530	31355	Canada	2008	1901	7886;20634;52436	18	5962	0_0_12_2_3_0_14_1_0_0_0	SRR1661205
78559	33288	Canada	2010	12536	71828	44	5986	1_1_22_0_7_0_0_0_1_0_0	SRR1661238
78594	34442	Canada	2011	10634	6179;20682;27297;39133;49003;52451;71838	532	6018	2_0_1_0_1_0_0_0_0_0_0	SRR1661275
78627	35425	Canada	2010	1902	6187;20711;27308;39137;52462;71846	42	6049	0_0_8_2_0_0_0_0_0_0_0	SRR1661312
78637	883218	Canada	1989	1927	71852	409	6057	0_12_0_0_1_0_0_0_0_0_0	SRR1661322
78640	DO17630	Denmark	1940	11678	71853	1060	6058	1_8_1_0_0_0_0_0_0_0_0	ERR439286
78645	DO23085	Denmark	1941	11677	71854	1096	6060	1_8_0_0_0_0_0_0_0_0_0	ERR439293
78652	DO48739	Denmark	1943	11678	71856	1060	6062	1_8_1_0_1_0_0_0_1_0_0	ERR439304
78653	DO51056	Denmark	1943	12246	24178;49015;54105	587	6063	49_0_0_0_0_0_0_0_0_0_0	ERR439305
78656	DO2179	Denmark	1946	11686	24179;49016;54106;57177;80361	588	6064	24_0_0_0_0_0_0_0_0_0_0	ERR439309
78671	DO23096	Denmark	1951	8135	71857	1098	6065	7_0_0_0_0_0_0_0_0_0_0	ERR439325
78672	DO26346	Denmark	1951	1889	24181;24203;49018;52465;71858	497	6066	1_7_0_0_2_0_0_0_0_0_0	ERR439326
78673	DO26370	Denmark	1951	6812	24182;24204	590	6067	1_9_0_0_0_0_0_0_0_0_0	ERR439327
78674	DO26537	Denmark	1951	11686	24183;49019;54107;57178;80362	588	6068	24_0_0_0_1_0_0_0_0_0_0	ERR439328
78675	DO26580	Denmark	1951	11703	24184;24205;57179	591	6069	50_0_0_0_0_0_0_0_0_0_0	ERR439329
78676	DO1424	Denmark	1953	11686	24185;52466;54108;57180;80363	588	6070	24_0_0_0_2_0_0_0_0_0_0	ERR439331
78677	DO66401	Denmark	1953	11711	24186;71859;79389	592	6071	48_0_1_0_0_0_0_0_0_0_0	ERR439334
78678	DO67893	Denmark	1953	11718	24187;71860	593	6072	27_0_1_0_0_0_0_0_0_0_0	ERR439335
78679	DO32051	Denmark	1954	11249	24188;24206;52467;54109;57181;71861	594	6073	27_0_3_0_0_0_0_0_0_0_0	ERR439336
78680	DO21958	Denmark	1954	11712	24189;71862;79390	595	6074	48_0_0_0_0_0_0_0_0_0_0	ERR439337
78681	DO22492	Denmark	1954	11652	24190;24207;49020;57182;71863	596	6075	30_0_0_0_0_0_0_0_0_0_0	ERR439338
78687	DO3783	Denmark	1955	11368	24191;24208;27317;52468;57183;71864	597	6076	43_0_0_0_0_0_0_0_0_0_0	ERR439348
78690	DO47438	Denmark	1955	11695	24192;27318;71865;79391	598	6077	42_0_1_0_1_0_0_0_0_0_0	ERR439351
78691	DO48480	Denmark	1955	11695	24193;27319;71866;79392	598	6078	42_0_1_0_0_0_0_0_0_0_0	ERR439352
78695	DO40555	Denmark	1969	11679	71867	551	6079	1_1_20_0_0_0_0_0_0_0_0	ERR439356
78699	DO11271	Denmark	1956	1599	24194;24195;54110;54111;57184;57185	599	6081	28_0_0_0_0_0_0_0_0_0_0	ERR439361
78700	DO2475	Denmark	1956	1599	24195;54111;57185	599	6081	28_0_0_0_0_0_0_0_0_0_0	ERR439362
78701	DO4034	Denmark	1956	1599	24195;54111;57185	599	6081	28_0_0_0_0_0_0_0_0_0_0	ERR439363
78704	DO1783	Denmark	1958	11714	24196	600	6082	27_0_5_0_0_0_0_0_0_0_0	ERR439367
78705	DO100	Denmark	1961	1889	24197;24209;52470;71869	497	6083	1_7_0_0_3_0_0_0_0_0_0	ERR439370
78706	DO156	Denmark	1961	10931	6222;20724;27321;39139;50472;52471;53851;71870	491	6084	0_12_7_2_0_0_0_0_0_0_0	ERR439371
78707	DO1197	Denmark	1961	11676	6223;20725;27322;39140;50473;52472;71871	552	6085	1_8_8_1_0_0_0_0_0_0_0	ERR439373
78709	DO97-48	Denmark	1997	1903	7976;20726;27323;71873	64	6087	0_2_37_0_1_0_0_0_0_0_0	ERR502177
78710	DO98-95	Denmark	1998	1931	71874	155	6088	1_1_27_0_0_0_0_0_0_0_0	ERR502178
78711	DO98-105	Denmark	1998	1901	7978;20728;53918;57186	18	6089	0_0_12_2_0_0_0_0_0_0_0	ERR502179
78716	DO04-238	Denmark	2004	6721	79924	1203	6093	0_0_51_0_0_0_0_0_0_0_0	ERR502185
78727	DO13-72	Denmark	2013	8130	7992;20742;27331;53919;71885	32	6104	0_0_41_2_2_0_0_0_0_0_0	ERR502198
78739	DO13-242	Denmark	2013	7365	15369;27337;50474;52479;71891;79397	577	6116	0_2_47_0_0_0_0_0_0_0_0	ERR502211
78741	DO80-1256	Denmark	1980	11696	6266;20753;54112;71893	407	6117	8_1_0_3_0_0_0_0_0_0_0	ERR502213
78745	DO82-343	Denmark	1982	8151	6285;20756;27339;57194;71895	553	6120	4_0_0_0_0_0_0_0_0_0_0	ERR502217
78755	DO87-1128	Denmark	1987	7371	10455;20759;27340;39143;52481	373	6124	0_2_8_0_0_0_0_0_0_0_0	ERR502227
78760	DO92-294	Denmark	1992	1599	71899	1036	6129	1_1_4_0_0_0_0_0_0_0_0	ERR502232
78763	DO95-171	Denmark	1995	1600	71901;80369	1100	6132	0_0_44_0_0_0_0_0_0_0_0	ERR502235
78766	DONV51-26544	Denmark	1951	11708	24198;24210;52482;54115;57198;80370	601	6135	44_0_0_0_0_0_0_0_0_0_0	ERR775141
78771	DONV62-4623	Denmark	1962	10931	6296;20769;24214;27347;53920;71902	491	6136	0_12_7_0_0_0_0_0_0_0_0	ERR775154
78773	DONV44-54211	Denmark	1944	1889	6297;20770;27348;71904	497	6138	1_7_0_0_0_0_0_0_0_0_0	ERR779765
78775	DONV59-82	Denmark	1959	7365	6301;20771;27349;52483;71905	490	6139	35_0_0_0_0_0_0_0_0_0_0	ERR779771
78776	DONV59-646	Denmark	1959	7365	6314;20772;27350;71906	490	6140	35_0_0_0_1_0_0_0_0_0_0	ERR779772
78777	DONV58-1148	Denmark	1958	11201	24199;54116;71907	602	6141	11_1_0_0_0_0_0_0_0_0_0	ERR779774
78780	DONV44-7072	Denmark	1944	1889	24200;24211;71908	497	6142	1_7_0_0_1_1_0_0_0_0_0	ERR779794
78782	DONV43-19018	Denmark	1943	11683	79925	1204	6144	47_0_0_0_0_0_0_0_0_0_0	ERR779802
78783	DONV56-7616	Denmark	1956	1889	6317;27352;71911	497	6145	1_7_0_0_1_0_0_0_0_0_0	ERR779803
78784	DONV45-41906	Denmark	1945	1889	6320;20774;27353;71912	497	6146	1_7_0_0_1_2_0_0_0_0_0	ERR779811
78790	DONV43-54204	Denmark	1943	11253	6322;20775;27354;52485;53852;54117;71913	493	6147	49_1_0_0_0_1_0_0_0_0_0	ERR779833
78791	DONV43-64995	Denmark	1943	11716	24202;27355	604	6148	32_0_0_0_0_0_0_0_0_0_0	ERR779836
78804	VNM11-101	Vietnam	2011	1600	8020;20778;49022;54118	151	6151	0_2_48_3_1_0_0_0_0_1_0	ERR3623129
78816	VNM11-15	Vietnam	2011	1920	71923	1051	6163	0_0_50_0_0_0_0_0_0_1_0	ERR3623143
78822	VNM11-21	Vietnam	2011	1600	9030;20793;27365;54119	151	6169	0_2_48_5_3_0_0_0_0_0_0	ERR3623151
78823	VNM11-22	Vietnam	2011	1920	71927	1051	6170	0_0_50_0_0_0_0_0_0_0_0	ERR3623152
78824	VNM11-23	Vietnam	2011	7360	8603;20795;27366;52489;71928	374	6171	0_0_16_0_0_0_0_0_0_0_0	ERR3623153
78825	VNM11-24	Vietnam	2011	1600	9012;20796;27367;54120	151	6172	0_2_48_5_0_0_0_0_0_0_0	ERR3623154
78832	VNM11-30	Vietnam	2011	6714	71931	555	6179	0_10_0_0_0_0_0_0_0_0_0	ERR3623162
78833	VNM11-31	Vietnam	2011	1920	71932	1051	6163	0_0_50_0_0_0_0_0_0_1_0	ERR3623163
78841	VNM11-39	Vietnam	2011	1600	9633;20809;27376;54121;71938	148	6186	0_0_57_0_3_0_0_0_0_0_0	ERR3623171
78848	VNM11-45	Vietnam	2011	1600	8048;20815;39153;49032;54122	148	6176	0_0_57_1_0_0_0_0_0_0_0	ERR3623178
78849	VNM11-46	Vietnam	2011	7371	8049;20816;71943;79400	34	6191	0_2_16_0_0_5_0_1_0_0_0	ERR3623179
78853	VNM11-5	Vietnam	2011	10313	8052;20818;27378;52495;71944;79401	263	6149	0_2_23_1_1_0_0_0_0_0_0	ERR3623183
78861	VNM11-57	Vietnam	2011	6714	71947	555	6200	0_10_0_0_0_0_0_0_0_1_0	ERR3623191
78872	VNM11-67	Vietnam	2011	1920	71957	1051	6209	0_0_50_0_0_0_0_0_0_2_0	ERR3623202
78891	VNM11-84	Vietnam	2011	1920	71970;80374	1051	932;6163;6168;6219	0_0_50_0_0_0_0_0_0_1_0	ERR3623222
78899	VNM11-91	Vietnam	2011	7371	8086;20854;39160;71976	34	6231	0_2_16_0_3_4_0_0_0_0_0	ERR3623230
78910	VNM16-100	Vietnam	2016	7360	8095;20862;27408;52506;54123;71983	346	6241	0_0_14_0_4_0_0_0_0_0_0	ERR3623353
78934	VNM16-123	Vietnam	2016	10241	9035;27418;52510	352	6258	0_2_0_32_17_0_0_0_0_0_0	ERR3623377
78938	VNM16-127	Vietnam	2016	7371	8115;20885;71996	34	6250;6265	0_2_16_0_2_0_0_0_0_0_0	ERR3623381
78952	VNM16-21	Vietnam	2016	8123	15370;27428;39173;52511	367	6275	0_0_15_0_0_4_0_0_0_2_0	ERR3623412
78953	VNM16-22	Vietnam	2016	8123	12686;27429;39174;52512	367	6275;6276	0_0_15_0_0_4_0_0_0_2_0	ERR3623413
78954	VNM16-23	Vietnam	2016	1600	9634;27430;39175;54124;72004	353			ERR3623414
78958	VNM16-29	Vietnam	2016	1600	8610;20899;27433;54125;72007;79414	148	6280	0_0_57_0_4_0_0_0_0_0_0	ERR3623418
78965	VNM16-36	Vietnam	2016	7827	8130;20905;27438;53923	219	6286	0_2_53_2_7_0_0_0_0_0_0	ERR3623425
78969	VNM16-4	Vietnam	2016	8123	9636;27442;39177;52517	367	6290	0_0_15_0_0_4_0_0_0_0_0	ERR3623430
78979	VNM16-49	Vietnam	2016	11173	9635;27451	401	6297	0_2_62_0_3_0_0_0_0_0_0	ERR3623440
78983	VNM16-52	Vietnam	2016	11173	10826;27452	401	6297	0_2_62_0_3_0_0_0_0_0_0	ERR3623444
79008	VNM16-8	Vietnam	2016	8123	8613;20940;27465;39193;52529	367	6290	0_0_15_0_0_4_0_0_0_0_0	ERR3623470
79025	VNM16-96	Vietnam	2016	8123	8615;27473;39201;52533	367	6327	0_0_15_0_0_4_0_0_0_1_0	ERR3623487
79079	GCWGS_0014	USA	2016	13539	6496;20981;27494;46365;54126;57291	304	6359	0_0_1_0_13_0_0_0_0_0_0	SRR5198674
79124	GCWGS_0640	USA	2016	1600	8238;21023;27527;39211;46371;49059;54127;57301	398	6403	0_2_2_0_0_1_2_0_0_0_0	SRR5990426
79246	LRRBGS_0265	USA	2016	1600	8344;21129;39233;46375;54128;57328	398	6514	0_2_2_0_0_1_0_0_0_0_0	SRR8079829
79254	LRRBGS_0257	USA	2016	6962	72097	1026	6522	2_0_2_0_2_0_0_0_0_0_0	SRR8079838
79255	LRRBGS_0258	USA	2016	8149	6634;21137;27619;52542;57331;72098	506	6523	5_2_0_4_1_0_0_0_0_0_0	SRR8079839
79271	LRRBGS_0206	USA	2016	12905	72104	516	6539	0_18_13_0_18_0_0_0_0_0_0	SRR8079856
79280	LRRBGS_0201	USA	2016	6962	72110	1104	6547	2_0_0_1_0_0_0_0_0_0_0	SRR8079865
79349	LRRBGS_0210	USA	2016	16474	6711;21222;52560;57361;72136;79420	506	6607	5_2_0_4_0_0_0_0_0_0_0	SRR8079937
79354	LRRBGS_0211	USA	2016	1601	72139;80415	509	6612	0_0_43_11_0_0_1_0_0_0_0	SRR8079942
79355	LRRBGS_0212	USA	2016	10931	6717;21228;27678;54129;57365	422	6613	0_12_9_3_9_0_0_0_0_0_0	SRR8079943
79363	GCWGS_0637	USA	2016	11181	6721;21236;27684;54130;80416	418	6621	0_0_43_8_7_0_0_0_0_0_0	SRR8088130
79365	GCWGS_0190	USA	2016	1584	72140	41	6623	1_1_2_0_49_0_0_0_3_0_0	SRR8088155
81971	13-12	Japan	2001	7363	8513;21298	8	6688	0_2_17_0_0_29_0_0_0_1_0	DRR237509
81989	13-51	Japan	2001	7363	8531;21316	8	6706	0_2_17_0_0_18_1_0_1_0_0	DRR237527
82351	AUSMDU00005557	Australia	2010	9362	8722	16	6845	0_2_1_0_183_0_0_0_0_0_0	ERR2133929
82583	NGRL_193058	Ireland	2016	13144	72181	549	6920	0_0_42_0_0_0_0_0_0_0_0	SRR7226398
82589	008	Ireland	2013	8143	8780;21464;27771;82104	62	6926	0_0_26_3_9_0_0_0_0_1_0	SRR7226419
84017	16AM100095	Sweden	2016	13962	15658;27792	96	6961	0_18_8_1_3_0_0_0_0_0_0	ERR7986157
84022	16AM105569	Sweden	2016	13968	15662;27796;41515	133	6966	0_2_9_14_21_0_0_0_0_0_0	ERR7986653
86032	NG110	China	2013	11191	6475;21627;27906;39351;72269;82114	124	7106	0_18_7_0_3_1_0_0_0_0_0	SRR6765295
86048	NG390	China	2012	11961	5083;21637;39354	149	7120	0_2_64_0_5_0_0_0_0_0_0	SRR6765342
86051	NG067	China	2012	1902	5084;21638;27914;39356;52592;53853	263	7123	0_2_23_0_3_0_0_0_0_0_0	SRR6765339
86075	NG260	China	2012	1600	6751;21654;27928;41075;54132;72293;79424	148	7145	0_0_57_0_2_0_0_0_0_0_0	SRR6765315
86081	NG141	China	2013	1600	12440;27932;46397;54133;72296	565	7151	0_0_46_2_0_0_0_0_0_0_0	SRR6765405
86085	NG032	China	2012	12970	5552;21661;39367	149	7155	0_2_64_0_6_0_0_0_0_0_0	SRR6765401
86092	NG037	China	2012	7360	8450;21666;27936;54134	366	7162	0_0_17_0_0_0_0_0_0_0_0	SRR6765394
86103	NG183	China	2012	7367	15373;27938;50539;52601	352	7172	0_2_0_32_12_0_0_0_0_0_0	SRR6765383
86118	NG361	China	2013	1600	4984;21676;27945;52604;54135;72304	151	7187	0_2_48_1_5_0_0_0_0_2_0	SRR6765368
86142	NG392	China	2012	7367	6477;21691;27958;50540;52608	352	7207	0_2_0_32_15_0_0_0_0_0_0	SRR6765344
86143	NG389	China	2012	7827	5112;21692;27959	219	7208	0_2_53_2_4_0_0_0_0_0_0	SRR6765343
86162	NG046	China	2012	7360	4998;27963;54136;80457	346	7223	0_0_14_0_1_1_0_0_0_0_0	SRR6765516
86186	NG238	China	2012	1902	5125;21712;52620;53854;72330	263	7245;7375	0_2_23_0_0_0_3_0_0_0_0	SRR6765492
86189	NG433	China	2012	1583	5007;21713;54137;72331	345	7248	0_2_49_1_0_0_0_0_0_0_0	SRR6765489
86195	NG353	China	2012	1600	10539;21716;54138;72333	151	7254	0_2_48_1_5_0_0_0_0_1_0	SRR6765483
86212	NG290	China	2012	1600	6822;21726;27983;46403;72338	533	7267	0_0_46_0_0_0_0_0_0_0_0	SRR6765466
86216	NG166	China	2012	7828	72340	1066	7270	0_0_52_0_0_0_1_0_0_0_0	SRR6765462
86246	NG270	China	2012	1590	6830;21744;54139	435	653;909;3401;7294	0_12_2_0_5_0_0_0_0_0_0	SRR6765432
86249	NG267	China	2012	9899	5144;21745;27997;54140	258	7296	0_0_58_1_2_0_0_0_0_0_0	SRR6765429
86250	NG266	China	2012	7822	9053;21746;27998;39398;46405;57508;72351;79429	384	7297	0_2_10_0_0_0_0_0_0_0_0	SRR6765428
86266	NG136	China	2013	7828	72358	1066	7312	0_0_52_0_0_1_0_0_0_1_0	SRR6765412
86267	NG139	China	2013	11231	5590;21755;28007;39403;41076;80462	149	7313	0_2_64_2_0_0_0_0_0_0_0	SRR6765411
86271	NG135	China	2013	1902	5148;21756;28008;39404;52631;53855	263	7317	0_2_23_0_0_0_1_0_0_0_0	SRR6765407
86276	NG001	China	2012	7360	5048;21760;28012;54141;57512	346	7322	0_0_14_0_1_1_0_0_0_1_0	SRR6765545
86290	NG029	China	2012	1583	72367;80465	1080	7334	0_2_51_1_0_0_0_0_0_0_0	SRR6765726
86295	NG022	China	2012	1600	10829;28021;39407;54143;72368	151	7338	0_2_48_4_0_0_0_0_0_0_0	SRR6765721
86296	NG027	China	2012	1902	5157;21771;52635;53856;80466	263	7339	0_2_23_0_0_0_4_0_0_0_0	SRR6765720
86313	NG199	China	2013	11231	5160;21777	149	7353	0_2_64_0_0_0_0_0_0_0_0	SRR6765703
86322	NG101	China	2012	7827	72372	21	7361	0_0_33_24_12_0_0_0_0_0_0	SRR6765694
86334	NG365	China	2013	11191	5605;21790;28028;39418;57523;82126	124	7372	0_18_7_0_6_0_0_0_0_0_0	SRR6765682
86343	NG147	China	2012	1600	10830;21796;28033;41078;54145	148	7381	0_0_57_0_0_0_0_0_0_0_0	SRR6765673
86347	NG143	China	2013	14429	5609;21797;28034;53926;72384	34	7384	0_2_16_0_7_0_0_0_0_0_0	SRR6765669
86354	NG396	China	2013	10931	6843;21803;28039;53927	491	7391	0_12_7_1_2_0_0_0_0_0_0	SRR6765662
86375	NG329	China	2012	8123	8451;21811;28046;39427	367	7410	0_0_15_0_0_2_0_0_0_0_0	SRR6765641
86380	NG326	China	2012	7360	5087;28050;54146	346	7415	0_0_14_0_2_0_0_0_0_0_0	SRR6765636
86386	NG246	China	2012	1600	10558;21820;28054;54147	353	7421	0_2_48_12_0_0_0_0_0_0_0	SRR6765630
86395	NG437	China	2012	7356	5622;21826;28059;39431;46409;52648	292	7430	0_2_24_0_0_0_1_0_0_0_0	SRR6765621
86399	NG427	China	2013	10931	6852;21828;28062;53928	491	7433	0_12_7_1_2_0_0_0_0_1_0	SRR6765617
86400	NG426	China	2012	7828	72402	1066	7434	0_0_52_0_0_1_0_0_0_0_0	SRR6765616
86406	NG295	China	2013	7365	12442;28065;54148;72406;79435	566	7366;7439	0_2_48_0_0_0_0_0_0_0_0	SRR6765610
86420	NG017	China	2012	1600	7687;21837;28072;54149	353	7451	0_2_48_12_1_0_0_0_0_0_0	SRR6765596
86430	NG211	China	2013	1903	5193;21845;28079;72413	64	746;3392	0_2_37_0_0_0_0_0_0_0_0	SRR6765586
86457	NG376	China	2012	7360	5122;28089;54150	346	7484	0_0_14_0_0_0_0_0_0_0_0	SRR6765559
86458	NG375	China	2012	7827	5639;21855;28090;39446	219	7197;7485	0_2_53_2_41_0_0_0_0_0_0	SRR6765558
86568	AUSMDU00006890	New Zealand	2015	14420	6929;21885;72439	527	7532;7565	5_2_2_1_0_0_0_1_0_0_0	SRR5827059
86602	AUSMDU00007126	New Zealand	2015	11191	10845;80483	402	7558	0_18_16_0_0_0_0_0_0_0_0	SRR5827114
86626	AUSMDU00007122	New Zealand	2015	11191	10854;28112;80484	402	7573	0_18_16_0_0_0_0_0_0_2_0	SRR5827090
86852	AUSMDU00006938	New Zealand	2015	14420	6985;21933;52668;72468	527	7736	5_2_2_1_0_0_0_1_0_0_0	SRR5827391
87081	ECDC_AT13_487	Austria	2013	6726	11213;52669;57592;80488	431	7808	41_0_0_0_6_0_0_0_0_0_0	ERR1469602
87134	ECDC_BE13_451	Belgium	2013	8135	72507	425	7855	1_8_3_6_0_11_0_0_1_0_0	ERR1680313
87190	ECDC_DK13_454	Denmark	2013	11177	7272;28193;50580;52689;72530	430	7908	45_0_0_0_0_1_0_1_0_0_0	ERR1528324
87191	ECDC_DK13_455	Denmark	2013	11177	7273;22046;28194;50581;52690;72531	430	7909	45_0_0_0_0_1_0_0_0_1_0	ERR1528325
87241	ECDC_DK13_507	Denmark	2013	11177	7596;22082;28217;50593;52701;72557	430	7956	45_0_0_0_0_1_0_0_0_1_0	ERR1528182
87243	ECDC_DK13_509	Denmark	2013	1582	72559	1063	7958	0_0_41_0_0_0_0_0_0_0_0	ERR1528184
87261	ECDC_ES018	Spain	2013	11956	72566	222	7971	0_0_30_0_3_0_0_0_0_0_0	ERR1469571
87356	ECDC_FR13_111	France	2013	7363	72609	196	8058	0_0_52_1_1_0_0_0_8_2_0	ERR1602794
87375	ECDC_GC_074	Norway	2013	8123	72613	293	8075	1_1_3_0_0_0_0_0_0_0_0	ERR1469724
87385	ECDC_GC_084	Norway	2013	1583	5738;22190;28273;50606;72616	234	8084	0_2_60_0_0_0_0_0_0_0_0	ERR1469734
87402	ECDC_GC_101	Norway	2013	1583	10629;28280;72624	234	8100	0_2_60_0_1_0_0_0_0_0_0	ERR1469750
87424	ECDC_GE13_068	Germany	2013	8776	5773;22217;28288;39523;53930;80510	236	8122	0_18_1_5_0_0_0_0_0_0_0	ERR1549685
87511	ECDC_HU13_048	Hungary	2013	8135	72665	425	8199	1_8_3_6_0_2_1_0_0_0_0	ERR1514725
87534	ECDC_HU13_072	Hungary	2013	10241	6940;28342;52725;72672	352	8220	0_2_0_31_0_0_0_0_0_1_0	ERR1514698
87584	ECDC_LV13_003	Latvia	2013	1588	7737;28356;39554;52729;54153;72685	556	8263;8268;8271	0_0_33_63_0_0_0_0_0_0_0	ERR1549718
87593	ECDC_LV13_012	Latvia	2013	1588	7740;7742;22331;22334;28365;28368;39555;39556;52730;52731;54154;54155;72687;72689	556	8268;8271	0_0_33_63_0_0_0_0_0_0_0	ERR1549727
87596	ECDC_LV13_015	Latvia	2013	1588	7742;22334;28368;39556;52731;54155;72689	556	8271	0_0_33_63_0_0_0_0_0_0_0	ERR1549730
87605	ECDC_LV13_024	Latvia	2013	1588	7747;28375;39558;52733;54156;72696	556	8268;8271	0_0_33_63_0_0_0_0_0_0_0	ERR1549739
87606	ECDC_LV13_025	Latvia	2013	10932	7748;28376;54157;72697;79454	304	8279	0_0_1_0_25_1_0_0_0_0_0	ERR1549740
87609	ECDC_LV13_028	Latvia	2013	1588	7749;22344;28377;39559;52734;54158;72698	556	8268;8271	0_0_33_63_0_0_0_0_0_0_0	ERR1549743
87612	ECDC_LV13_031	Latvia	2013	1579	5938;22347;28380;72701	24	8283	0_0_43_1_0_17_0_0_1_1_0	ERR1549746
87630	ECDC_MT13_016	Malta	2013	11191	5953;22360;28389;52739;57679;72712	124	8298	0_18_7_0_8_0_0_0_0_0_0	ERR1555238
87654	ECDC_NL24	The Netherlands	2013	10932	7757;28395;54159;57681	304	8322	0_0_1_0_4_0_0_0_0_0_0	ERR1528253
87684	ECDC_NL60	The Netherlands	2013	11990	7770;22402;28409;72737	414	8344	1_8_5_0_52_23_0_0_0_0_0	ERR1528279
87722	ECDC_PT13_018	Portugal	2013	11992	6034;22430;28422;52748;80528	18	8376	0_0_12_2_3_0_21_0_0_0_0	ERR1560790
87780	ECDC_PT13_080	Portugal	2013	11956	72772	222	8420	0_0_30_0_3_0_0_0_0_1_0	ERR1560848
87791	ECDC_PT13_091	Portugal	2013	11994	72775	1115	8429	1_1_0_0_0_0_0_0_0_0_0	ERR1560859
87835	ECDC_RB13001546	UK	2013	1596	7908;22512;28460;72791	450	2293;2510;2606;8470	1_12_0_0_2_0_1_0_0_0_0	ERR1549777
87879	ECDC_RB13001983	UK	2013	8149	9645;22545;28473;52763;57707;72813	506	8510	5_2_0_4_6_0_0_0_0_0_0	ERR1555179
87895	ECDC_RB13002064	UK	2013	11989	72821;80540	44	8521;8522	1_1_22_6_0_0_0_0_0_0_0	ERR1555195
87968	ECDC_SE13_098	Sweden	2013	8112	72840	1047	8589	1_1_17_8_1_0_0_0_0_0_0	ERR1528311
87984	ECDC_SI13_033	Slovenia	2013	1582	72847	416	8604	0_0_18_3_3_2_0_1_0_0_0	ERR1514736
87994	ECDC_SI13_045	Slovenia	2013	1579	6274;22625;28523;39612	24	8614	0_0_43_1_0_18_0_0_6_0_0	ERR1528130
88251	28759	Canada	2006	6959	8431;28613;54161	406	4;1137;8760	0_0_0_0_0_0_0_0_0_0_0	SRR2736142
88265	31822	Canada	2009	1901	6436;22754	3	8768	0_2_0_1_0_0_0_15_0_0_0	SRR2736163
88266	32151	Canada	2009	1901	6437;22755	18	8769	0_0_12_2_3_0_0_5_0_0_0	SRR2736164
88358	37350	Canada	2013	1579	6500;22800;28624	24	8841	0_0_43_1_0_18_0_0_1_0_0	SRR2736261
88857	WHO L	Unknown	1996	1590	933;3539;6830;17015;18548;21744;22835;24046;25547;28635;54139;54162;56420;56606	435	653;909;3401;7294	0_12_2_0_5_0_0_0_0_0_0
88859	WHO N	Australia	2001	1583	751;1050;6538;16889;17131;22836;53999;54042;54163;69849;70001;72941	132	752;1047;3477;19715	0_2_38_0_0_0_0_0_0_0_0
88860	WHO O	Canada	1991	1902	8572;22837;28636	42	450;1038;3369	0_0_8_0_0_0_0_0_0_0_0	ERR1447935
92885	671231	Norway	2019	14791	8621;22900;28698;39681;41095;72982	239	8943	0_7_0_10_0_0_0_0_1_0_0
95000	08-018	Japan	1996	1587	8888;22941;54164	208	8997	0_2_36_1_0_0_0_0_0_0_0
95013	08-031	Japan	1996	1587	8889;22948;54165	208	9009	0_2_36_0_0_0_0_1_0_0_0
95034	09-005	Japan	1997	7366	8828;28751;50647;52822;53857;54166;80559	435	9027	0_12_2_0_3_0_0_0_0_0_0
95038	09-011	Japan	1997	7367	8848;22961;41101;52823;57802	95	9030	0_2_4_0_1_0_0_0_1_4_0
95046	09-026	Japan	1997	1920	73010	1117	9036	0_0_43_0_0_0_1_0_0_1_0
95048	09-029	Japan	1997	1920	73011	1117	9038	0_0_43_0_0_0_1_0_0_0_0
95052	09-033	Japan	1997	1920	73012	1117	9040	0_0_43_0_1_0_0_0_0_0_0
95053	09-034	Japan	1997	1920	73013	1117	9041	0_0_43_0_0_0_1_0_1_0_0
95080	98-032	Japan	1996	7372	8862;22980;28769;39702;52826;57810;73018	559	9060	0_13_1_0_0_0_0_0_0_0_0
95086	98-042	Japan	1997	1590	8872;28772;39704;50649;53931;53959	435	9066	0_12_2_0_2_0_0_0_0_0_0
95093	98-057	Japan	1997	1920	73022	1117	9071	0_0_43_0_0_0_0_0_0_0_0
95778	GHA-ADB-216	Ghana	2015	13766	73027	155	9093	1_1_27_4_0_0_0_0_0_0_0
95784	GHA-ARM-127	Ghana	2014	15641	12697;28786;39713;41527;50653;57833;73030;79472	567	9098	0_2_13_0_0_0_0_0_0_0_0
95790	GHA-TMH-040	Ghana	2012	1931	73036;80565	1029	9102	1_1_15_1_0_0_0_0_0_0_0
95797	GHA-TMH-458	Ghana	2015	1603	12700;29257;54167	568	9109	0_12_6_0_0_1_0_0_0_0_0
95875	UMNJ15_061W	China	2011	1583	8937;54168;73048	345	9133	0_2_49_1_0_1_0_0_0_0_0
95876	UMNJ19_04C7	China	2011	11984	8938;29258;54169	258	9134	0_0_58_1_1_0_0_0_0_0_0
99936	NG_AMS0456	The Netherlands	2018	12462	9092;23041;29285;54170	244	9211;9212	1_1_5_0_2_0_0_0_0_0_0
99965	NG_AMS0460	The Netherlands	2018	13956	9117;23056;29296;80572	17	9230	0_2_15_2_0_0_0_0_0_0_0
100004	NG_AMS0467	The Netherlands	2018	11516	73125	516	9253	0_18_13_0_0_8_0_0_0_0_0
102325	NCTC12700	Unknown		11075	9364;23231;53932	517	9709	0_12_7_4_0_0_0_0_0_1_0	ERR849502
106124	1912_Kenya	Kenya	2016	11242	12424;29728;50714;54171;80636	562	9759	0_9_0_5_5_0_0_0_0_0_0	ERR6002996
106128	2245_Kenya	Kenya	2017	11367	12410;29730;50716;54172	502	9763	0_2_55_1_0_1_0_0_0_0_0	ERR6003021
106130	2320_Kenya	Kenya	2016	1932	12425;29731;50717;54173	562	9765	0_9_0_5_2_0_0_0_0_0_0	ERR6002983
106132	2372_Kenya	Kenya	2016	8133	73317;80638	503	9767	0_0_36_1_0_0_0_0_0_0_0	ERR6002997
106133	2416_Kenya	Kenya	2018	13778	73318	563	9768	1_0_0_1_0_0_0_0_0_0_0	ERR6003004
106136	2533_Kenya	Kenya	2016	13778	12427;29735;39904;50720;54176	563	9771	1_0_0_0_0_0_0_0_0_0_0	ERR6003022
106137	2537_Kenya	Kenya	2016	13766	10876;23249;29736;50721;52917;54177;58021;80639	213	9772	1_1_34_0_1_0_0_0_0_1_0	ERR6003028
106141	2643_Kenya	Kenya	2016	11367	12414;29738;50725;54178	502	9776	0_2_55_1_0_0_0_0_0_0_0	ERR6003005
106142	2664_Kenya	Kenya	2016	13766	10879;23253;29739;50726;52918;54179;58024;80640	213	9777	1_1_34_0_1_0_0_0_0_0_0	ERR6003011
106143	2665_Kenya	Kenya	2017	1932	12428;29740;41619;50727;54180;73323	562	9778	0_9_0_5_0_0_0_0_0_0_0	ERR6003017
106144	2665-25_Kenya	Kenya	2017	1932	12428;23254;29740;29741;41619;41620;50727;50728;54180;54181;73323;73324	562	9778;9779	0_9_0_5_0_0_0_0_0_0_0	ERR6003023
106145	2687_Kenya	Kenya	2016	11750	12415;29742;39906;50729;54182;58025;80641	213	9780	1_1_34_3_0_0_0_0_0_0_0	ERR6003029
106146	2694_Kenya	Kenya	2016	11366	9435;23255;29743;41621;50730;54183;73325	501	9781	0_16_4_0_7_0_0_0_0_0_0	ERR6002985
106148	2699_Kenya	Kenya	2018	16666	73327;80642	503	9783	0_0_36_3_0_0_0_0_0_0_0	ERR6002999
106150	2728_Kenya	Kenya	2018	13778	73329	563	9785	1_0_0_1_0_0_0_0_0_1_0	ERR6003012
106151	2730_Kenya	Kenya	2017	8133	73330;80643	503	9786	0_0_36_1_0_3_0_0_0_0_0	ERR6003018
106154	2801_Kenya	Kenya	2016	16664	9451;23259;29749;41625;50736;54187;73332;79491	501	9789	0_16_4_0_4_0_0_0_0_1_0	ERR6002986
106158	2901_Kenya	Kenya	2017	13778	73335	563	9785	1_0_0_1_0_0_0_0_0_1_0	ERR6003013
106160	2921_Kenya	Kenya	2017	11750	10888;23263;29753;39911;50738;54189;58031	213	9793	1_1_34_2_0_0_0_0_0_0_0	ERR6003025
106162	3103_Kenya	Kenya	2019	8133	73338;80644	503	9795	0_0_36_1_0_4_0_0_0_0_0	ERR6002987
106163	3107_Kenya	Kenya	2019	1932	12431;29756;50741;54191;80645	562	9796	0_9_0_5_4_0_0_0_0_0_0	ERR6002994
106571	ERR3577897	UK	2013	7822	9776	133	9872	0_2_9_14_6_0_3_0_0_0_0	ERR3577897
106797	ERR3577456	UK	2014	1594	10026;29925	414	10042	1_8_5_0_38_0_0_2_0_0_0	ERR3577456
106808	ERR3577467	UK	2015	16696	10038;29931;41683;73429	416	10053	0_0_18_28_0_0_0_0_0_0_0	ERR3577467
106825	ERR3577484	UK	2015	10634	10055;23310;29942;39953;50755;73439	532	10068	2_0_1_0_2_0_0_0_0_0_0	ERR3577484
106839	ERR3577500	UK	2015	1600	10070;23312;29950;39957;46915;54192;58058	398	10081	0_2_2_0_1_0_0_0_0_0_0	ERR3577500
106901	ERR3577567	UK	2014	8163	10148;23330;29998;39988;73467	439	10139	5_2_0_1_4_0_0_0_0_2_0	ERR3577567
106987	ERR3577657	UK	2015	1600	10256;24318;30049;40017;46916;50765;54193;58070;73523	398	10213	0_2_2_0_2_0_0_0_0_0_0	ERR3577657
107065	ERR3577739	UK	2015	8143	10388;82229	62	10275	0_0_26_3_7_0_0_3_0_2_0	ERR3577739
107134	ERR3577815	UK	2013	1583	10459;30120;41720;50774;52961;73601	538	10324	0_2_21_0_3_0_0_0_0_0_0	ERR3577815
107203	ERR3577890	UK	2013	11249	10554;30161;40055;41733;58081;80661	236	10375	0_18_1_9_1_0_0_0_0_0_0	ERR3577890
107249	ERR3577948	UK	2016	8156	10599;30188	17	10407	0_2_15_0_19_0_3_0_0_0_0	ERR3577948
107293	ERR3577998	UK	2016		10652;30219;73668	124	10446	0_18_7_0_10_1_0_0_0_0_0	ERR3577998
107365	ERR3578074	UK	2016	8156	10726;23405;52988;53858;73698	17	10507	0_2_15_0_19_98_0_0_0_0_0	ERR3578074
107388	ERR3578098	UK	2016	1893	10751;28850;29180;50786	498	10527	0_16_0_2_7_0_0_0_0_0_0	ERR3578098
107413	ERR3578124	UK	2016	8163	12693;30293;40134;52994;73724	439			ERR3578124
107606	ERR3578891	UK	2013	11231	10995;30424;41804	149	10701	0_2_64_1_1_0_1_2_0_0_0	ERR3578891
107614	ERR3578903	UK	2013	1587	73806	549	10707	0_0_42_0_2_0_0_0_0_0_0	ERR3578903
107618	ERR3578908	UK	2013	9363	11007	16	10316;10711	0_2_1_0_118_0_0_0_0_0_0	ERR3578908
107631	ERR3578922	UK	2013	11184	11020;30435;41808;58117	335	10719	0_2_12_1_0_0_0_0_0_0_0	ERR3578922
107688	ERR3578987	UK	2014	7827	11069;23482	219	10763	0_2_53_2_33_0_0_0_0_1_0	ERR3578987
107706	ERR3579005	UK	2015	7367	11086;30474;40246;53018	352	10780	0_2_0_32_12_1_2_0_0_0_0	ERR3579005
107713	ERR3579012	UK	2015	1600	11093;23488;30479;40249;46920;50804;54195;58129	398	10787	0_2_2_0_1_0_0_0_0_1_0	ERR3579012
107720	ERR3579019	UK	2015	1583	73855	133	10104	0_2_9_9_13_0_0_0_0_0_0	ERR3579019
107732	ERR3579031	UK	2015	1596	11111;30487;73857	450	10803	1_12_0_0_2_0_5_0_1_0_0	ERR3579031
107733	ERR3579032	UK	2015	1600	11112;23491;30488;40258;46921;50806;54196;58130	398	10804	0_2_2_0_1_0_0_0_0_2_0	ERR3579032
107749	ERR3579053	UK	2014	1596	11128;30499;73865	450	10819	1_12_0_0_2_0_6_0_0_0_0	ERR3579053
107855	ERR2865780	Australia	2018	12039	73920	133	4963	0_2_9_14_40_10_0_0_0_0_0	ERR2865780
107871	ERR4160668	Argentina	2013	1901	11251;30592	3	10924	0_2_0_1_0_151_0_0_0_0_0	ERR4160668
107909	GCWGS-0557	USA	2014	8143	11287;30622;40300;41872;50815;53036;58148	62	10957	0_0_26_3_51_0_2_0_0_0_0	SRR5235204
107967	GCWGS-3432	USA	2018	7371	11341;30667;41152;41357;73945	34	11003	0_2_16_5_0_0_0_1_1_0_0	SRR9985734
108013	SRR8079702	USA	2014	1579	11372;23545;30693;30703;40319;40320;41897;41902;58162;58165	24	11034	0_0_43_1_0_18_0_4_0_0_0	SRR8079702
108707	NGPT07042	Portugal	2007	7363	11505;30801;41941	416	11246	0_0_18_26_1_0_0_0_0_0_0	ERR3851489
108811	NGPT10069	Portugal	2010	8161	11534;30817;41948;50838;74012	166	11299	1_1_36_0_1_1_0_0_0_0_0	ERR3851629
109210	ERR2632038	USA	2012	1893	74130	31	11600	0_2_29_9_15_1_0_0_1_1_0	ERR2632038
109244	ERR2631782	USA	2013	1579	11785;24326;24353;30977;42036;74149	24	11629;11632	0_0_43_1_0_46_0_0_1_0_0	ERR2631782
109302	ERR3201001	USA	2013	10932	11835;31013;54197	304	11676	0_0_1_0_31_2_1_0_0_0_0	ERR3201001
109399	ERR3201059	USA	2013	1601	74202	509	11762	0_0_43_12_10_2_0_0_0_1_0	ERR3201059
109417	ERR3201311	USA	2012	6962	74213	1026	11780	2_0_2_0_5_0_0_0_0_0_0	ERR3201311
109465	ERR3201031	USA	2012	12462	11971;23630;31130;54198	244	11816	1_1_5_0_7_0_1_0_0_0_0	ERR3201031
109466	ERR1837107	USA	2012	12462	11972;31131;54199	244	11817	1_1_5_0_7_1_0_0_0_0_0	ERR1837107
109518	ERR1204774	USA	2014	6962	74261	1026	11865	2_0_2_0_3_1_0_0_0_3_0	ERR1204774
109520	ERR3201184	USA	2012	10634	12023;23639;40457;42116;74263	532	11867	2_0_1_0_4_0_0_0_0_1_0	ERR3201184
109521	ERR3201161	USA	2012	10634	12024;31166;40458;42117;74264	532	11868	2_0_1_0_4_0_0_0_0_0_0	ERR3201161
109526	ERR1204797	USA	2014	6962	74269	1026	11873	2_0_2_0_3_1_0_0_0_1_0	ERR1204797
109527	ERR1204780	USA	2014	6962	74270	1026	11874	2_0_2_0_3_1_0_0_0_2_0	ERR1204780
109544	ERR3201307	USA	2012	7363	12041;31187;42123;80751	196	11890	0_0_52_1_1_19_3_0_0_0_0	ERR3201307
109703	ERR3200923	USA	2013	11414	14828;31295;42173;51010;51971;74350	507	12029	22_0_0_5_4_0_0_0_0_0_0	ERR3200923
109730	ERR3201286	USA	2012	7363	74368	196	12045	0_0_52_1_1_57_0_0_0_0_0	ERR3201286
109749	ERR2631881	USA	2013	7363	12192;80791	196	12064	0_0_52_1_1_22_0_0_0_1_0	ERR2631881
109787	ERR3200818	USA	2012	7828	12212;31345;51015;51975;74398	510	12095	0_1_0_0_1_0_0_1_0_0_0	ERR3200818
109833	ERR3200838	USA	2012	12462	12240;23670;31378;42201;54200	244	12129	1_1_5_0_7_0_0_0_0_0_0	ERR3200838
109834	ERR3200874	USA	2012	12462	12241;31379;42202;54201	244	12130	1_1_5_0_8_0_0_0_0_0_0	ERR3200874
109859	ERR2632000	USA	2013	11184	12262;23673;31399;58379	335	12154	0_2_12_1_0_1_0_0_0_0_0	ERR2632000
109947	ERR3200987	USA	2013	10932	12345;31459;50898;54202	304	12238	0_0_1_0_31_4_0_0_0_0_0	ERR3200987
109952	ERR3201284	USA	2012	10932	12350;23685;51037;54203	304	12243	0_0_1_0_31_2_0_0_1_0_0	ERR3201284
109954	ERR3200849	USA	2013	1601	74459	509	12245	0_0_43_12_10_0_0_0_0_0_0	ERR3200849
109974	ERR1204794	USA	2014	1893	74478	31	12264	0_2_29_9_15_0_0_0_0_1_0	ERR1204794
111496	GCWGS-11251	USA	2019	13413	74569	509	12445	0_0_43_12_21_0_0_0_0_0_0	SRR16999761
111600	GCWGS-7078	USA	2019	11181	12606;31704;42406;51062;51982;54204;58492	418	12546	0_0_43_8_3_1_0_0_0_0_0	SRR16644675
111701	GCWGS-9760	USA	2019	1587	12677;31794;42471;53224;74658	239	12641	0_7_0_4_58_0_0_0_0_0_0	SRR16644049
115819	14ARS_CVM0013	Philippines	2014	8780	14259;28965;33387;54205	21	14181	0_0_33_31_10_0_0_0_0_0_0	ERR2799256
115873	GCWGS-10106	USA	2019	1588	14294;33430;54206	21	14217	0_0_33_12_231_0_0_0_0_0_0	SRR16999600
115894	GCWGS-10362	USA	2019	1590	75259	509	14237	0_0_43_21_0_0_0_0_0_0_0	SRR16999619
115918	GCWGS-10956	USA	2019	6962	75269	1104	14261	2_0_0_1_4_0_0_0_0_0_0	SRR16999477
115926	GCWGS-11201	USA	2019	1599	75273	243	14269	1_1_17_6_1_49_0_0_0_1_0	SRR16999449
115987	GCWGS-6069	USA	2019	6962	75286	1104	14329	2_0_0_0_3_0_0_0_1_1_0	SRR16644222
116010	GCWGS-6619	USA	2019	8143	14405;34421;42556	62	14352	0_0_26_6_1_21_0_0_0_0_0	SRR16644174
116017	GCWGS-6786	USA	2019	13413	75304	509	14358	0_0_43_12_12_0_0_0_0_0_0	SRR16643993
116124	GCWGS-9253	USA	2019	6962	75350	1104	14457	2_0_0_1_6_0_0_0_0_0_0	SRR16644415
116145	GCWGS-9447	USA	2019	13536	14510;33682;54207	17	14477	0_2_15_5_13_0_0_0_0_0_0	SRR11724649
116166	GCWGS-9739	USA	2019	12093	75364	418	14495	0_0_43_7_3_0_0_1_0_0_0	SRR11724334
116170	GCWGS-9771	USA	2019	6962	75367	1104	14499;23490	2_0_0_1_1_0_0_0_0_0_0	SRR11724259
116171	GCWGS-9772	USA	2019	16162	14534;33701;42654	571	14500	0_2_68_0_0_0_1_1_0_0_0	SRR11724258
116254	111	USA	1994	1927	75384	409	14543	0_12_0_0_3_0_1_0_0_0_0	SRR13215678
116255	114	USA	1994	1927	75385	409	14544	0_12_0_0_3_0_0_0_0_0_0	SRR13215677
116387	18AR1200	New Zealand	2018	14420	14672;33808;42702;53264;53861;75406	527	14666	5_2_2_1_0_2_0_0_1_0_0	SRR14826577
116471	18AR1541	New Zealand	2018	14420	14725;33868;42733;53275;75442	527	14735	5_2_2_1_0_2_0_0_0_0_0	SRR14826334
116521	19AR0056	New Zealand	2019	14420	14759;34516;42759;53286;75462	527	14777	5_2_2_1_0_2_0_0_2_0_0	SRR14826531
116841	19AR0224	New Zealand	2019	1601	75502	505	14738	10_0_0_0_14_0_0_0_0_1_0	SRR14826590
116890	19AR0358	New Zealand	2019	7359	14861;34578;59400	223	14868	1_8_6_0_2_0_29_0_0_1_0	SRR14826374
116910	19AR0380	New Zealand	2019	1601	75540	505	14808;14905	10_0_0_0_14_0_0_0_0_0_0	SRR14826610
116912	19AR0382	New Zealand	2019	1601	75541	505	14738	10_0_0_0_14_0_0_0_0_1_0	SRR14826435
116934	19AR0456	New Zealand	2019	1601	75554	505	14901	10_0_0_0_16_0_0_0_0_0_0	SRR14826629
116937	19AR0460	New Zealand	2019	7359	14892;34609;42839;81041	223	14903	1_8_6_0_2_0_0_9_0_0_0	SRR14826631
117778	500025	Sweden	2016	6726	15207;34914;51282;51987;81048	431	15185	41_0_0_0_5_0_1_0_0_0_0	ERR7987167
117781	500042	Sweden	2016	11191	15210;34917;51283	96	15188	0_18_8_1_1_1_0_0_0_0_0	ERR7987170
117800	500221	Sweden	2016	7367	15229;34933;42851;53330	352	15207	0_2_0_32_12_1_1_0_0_0_0	ERR7987348
117848	500650	Sweden	2016	10931	15269;34970;54210	422	15241	0_12_9_3_17_0_0_0_0_0_0	ERR7987525
117919	500233	Sweden	2016	11431	15294;34988;42866;54211;59486	544	15261	0_0_27_0_1_1_0_0_4_0_0	ERR7987353
117963	16-132	Sweden	2016	11431	15335;35024;42875;54212;59501	544	15297;15338	0_0_27_0_2_0_0_0_0_0_0	ERR7975725
117997	16-176	Sweden	2016	11999	15365;35053;40829;42889	16	15328	0_2_1_0_61_0_0_0_1_7_0	ERR7975925
118038	16-210	Sweden	2016	8135	75749	425	15357;15368;15388	1_8_3_6_0_15_0_0_0_0_0	ERR7975965
118043	16-217	Sweden	2016	8130	15411;35083;42901;51298	546	15362	0_0_29_4_0_0_0_0_0_0_0	ERR7975971
118049	16-224	Sweden	2016	8135	75753	425	15357;15368;15388	1_8_3_6_0_15_0_0_0_0_0	ERR7975979
118139	16-314	Sweden	2016	11431	15485;35150;42934;54215;59540	544	15342;15449	0_0_27_0_1_1_0_0_0_1_0	ERR7977503
118151	16-330	Sweden	2016	11431	15496;35159;42938;54216;59543	544	15444	0_0_27_0_4_0_0_0_0_0_0	ERR7977519
118156	16-339	Sweden	2016	8135	75789	425	15447	1_8_3_6_3_2_0_0_0_3_0	ERR7977526
118160	16-343	Sweden	2016	8130	15503;35164;53938	546	15451	0_0_29_4_1_0_0_0_0_0_0	ERR7977531
118166	16-350	Sweden	2016	8776	15509;35168;42945;53939	236	15453	0_18_1_16_0_0_0_0_0_0_0	ERR7977639
118174	16-360	Sweden	2016	12462	15516;35175;42948;53360;54218	244	15460	1_1_5_0_9_0_0_0_0_5_0	ERR7977649
118284	16-411	Sweden	2016	13484	75823	516	15500	0_18_13_0_0_10_0_0_0_0_2	ERR7985331
118301	16-43	Sweden	2016	1600	15586;35230	533	15513	0_0_46_1_4_0_0_0_0_0_0	ERR7985353
118321	16-45	Sweden	2016	13475	15604;35245;42978;53940	354	15533	0_18_0_1_0_0_0_0_0_0_0	ERR7985863
118324	16-452	Sweden	2016	8133	75831	503	15536	0_0_36_4_13_0_0_0_0_0_0	ERR7985866
118471	16-541	Sweden	2016	8156	15679	17	15605	0_2_15_0_19_3_0_0_5_2_0	ERR7986043
118486	16-562	Sweden	2016	1892	75870	425	15617	1_8_3_2_0_1_0_0_0_2_0	ERR7986061
118527	16-62	Sweden	2016	8130	15733;35353;49265	546	15652	0_0_29_5_0_0_0_0_0_0_0	ERR7986114
118530	16-67	Sweden	2016	1583	15736;35356;43004	538	15655	0_2_21_0_0_1_0_0_0_0_0	ERR7986118
118561	16AM100149	Sweden	2016	1901	15764	3	15681	0_2_0_1_27_6_4_0_0_0_0	ERR7986164
118566	16AM100239	Sweden	2016	1584	75902	41	15675;15740	1_1_2_0_52_0_1_0_0_1_0	ERR7986171
118579	16AM100543	Sweden	2016	1600	15782;35399	533	15513;15685	0_0_46_1_4_0_0_0_0_0_0	ERR7986184
118618	16AM101236	Sweden	2016	11175	15817;35429;43023;53401;54221;59626;75925	428	15720	13_0_0_0_0_2_0_0_0_0_0	ERR7986397
118628	16AM101461	Sweden	2016	1600	15826;35437	533	15729	0_0_46_1_4_1_0_0_0_0_0	ERR7986409
118639	16AM101727	Sweden	2016	1599	75936	243	15736	1_1_17_6_11_0_0_1_1_2_0	ERR7986420
118679	16AM102565	Sweden	2016	1583	15873;35481;75953	234	15754	0_2_60_0_4_0_0_0_0_0_0	ERR7986502
118716	16AM103578	Sweden	2016	8156	15901;35508	17	15771	0_2_15_0_19_99_0_0_0_0_0	ERR7986541
118772	16AM104489	Sweden	2016	1583	15929;35535	538	15788	0_2_21_0_0_0_2_0_0_0_0	ERR7986600
118799	16AM105145	Sweden	2016	1582	75990	416	15817	0_0_18_3_3_4_0_0_0_0_0	ERR7986631
118839	16AM105877	Sweden	2016	8143	76008	416	15841	0_0_18_11_3_0_0_0_0_0_0	ERR7986672
119077	16AM106133	Sweden	2016	1588	16010;35605;54222	21	15847	0_0_33_12_3_10_0_0_0_2_0	ERR7986683
119089	16AM106296	Sweden	2016	7359	15965;16022;59656;59668	223	15394;15421	1_8_6_0_2_0_19_0_0_1_0	ERR7986696
119116	16AM106791	Sweden	2016	11177	16046;35634;51340;51992;76018	430	15872	45_0_0_0_0_13_0_0_0_0_0	ERR7986725
119171	16AM107978	Sweden	2016	1583	16098;35674;43110	538	15908	0_2_21_0_6_0_0_0_0_0_0	ERR7986782
119174	16AM108054	Sweden	2016	1583	16101;35677;43111	538	15908	0_2_21_0_6_0_0_0_0_0_0	ERR7986785
119210	16AM108711	Sweden	2016	11975	16136;35707;53433;76052	439	15929	5_2_0_1_35_0_0_0_0_0_0	ERR7986824
119213	16AM108853	Sweden	2016	11431	16139;35710;43128;54223;81089	544	15931	0_0_27_0_1_1_0_0_2_0_0	ERR7986827
119250	16AM109417	Sweden	2016	13970	16177;35739;51348;51993;76068	430	6968	45_0_0_0_1_0_0_0_0_0_0	ERR7986864
119369	16AM111628	Sweden	2016	1599	76108	243	16035	1_1_17_6_1_9_2_0_2_7_0	ERR7987065
119407	16AM112504	Sweden	2016	13970	16007;16177;23925;27797;35739;35854;50520;51348;51357;51993;51995;52584;72202;76068;76124;79421	430	6968	45_0_0_0_1_0_0_0_0_0_0	ERR7987104
119410	16AM112571	Sweden	2016	1587	16314;35855;43173	239	16061	0_7_0_4_6_3_0_1_1_0_0	ERR7987107
119512	TH8	Thailand	2018	1587	16374;35903;47241;81093	239	16103	0_7_0_5_0_0_0_0_0_1_0	ERR9668996
119513	TH9	Thailand	2018	11368	16375;35904;53468;53863	236	16104	0_18_1_7_1_0_0_0_0_0_0	ERR9669008
119520	TH16	Thailand	2018	8112	76144	1084	16110	1_1_19_1_1_0_0_0_1_0_0	ERR9668851
119528	TH25	Thailand	2018	13333	16390;35919	239	16118	0_7_0_4_74_0_0_0_0_0_0	ERR9668913
119531	TH29	Thailand	2018	1903	76147	37	16121	0_0_47_20_0_0_0_0_0_0_0	ERR9668923
119532	TH30	Thailand	2018	1587	16394;35923;47253;76148	239	16122	0_7_0_15_0_0_0_0_0_0_0	ERR9668930
119540	TH39	Thailand	2018	8112	76151	1084	16129	1_1_19_1_1_0_0_0_0_0_0	ERR9668940
119543	TH42	Thailand	2018	7827	16404;35933;47260	580	16132	1_1_39_0_0_0_0_0_0_0_0	ERR9668944
119545	TH44	Thailand	2018	13962	16406;35935;47262	96	16134	0_18_8_1_7_0_0_0_0_0_0	ERR9668946
119561	TH62	Thailand	2018	8136	16421;35950;47268;54224	581	16149	0_0_62_0_0_0_0_0_0_0_0	ERR9668977
119565	TH66	Thailand	2018	8130	76157	1089	16153	0_0_30_8_0_0_0_0_0_0_0	ERR9668981
119566	TH67	Thailand	2018	1582	16426;35955;47271	582	16154	0_0_18_33_0_0_0_0_0_0_0	ERR9668982
119568	TH69	Thailand	2018	1579	16428;35957;47272;76158	344	16156	0_2_5_1_0_0_0_0_0_0_0	ERR9668984
119581	TH84	Thailand	2018	10622	16440;35969;47276;76163;79599	528	16169	0_20_3_0_3_0_0_0_0_0_0	ERR9669001
119587	TH90	Thailand	2018	7367	16446;35975;47279;76165	344	16175	0_2_5_1_1_0_0_0_0_0_0	ERR9669009
119592	TH95	Thailand	2018	8143	16451;35980;76166;82471	62	16180	0_0_26_3_122_0_0_0_0_0_0	ERR9669014
119593	TH96	Thailand	2018	1597	16452;35981;47282;54225	548	16181	0_0_18_32_0_0_0_0_0_0_0	ERR9669015
119594	TH98	Thailand	2018	7363	16453;35982	293	16182	1_1_3_0_2_0_0_0_0_0_0	ERR9669017
120371	22-15428	Australia	2022	13871	16468;47292;53941;53960	583	16227	0_14_0_1_1_0_0_0_0_0_0
120372	22-15455	Australia	2022	16790	16469;47293;53942;53961	583	16228	0_14_0_2_0_0_0_0_0_0_0
122722	22GB001332	Norway	2022	16985	76174	1142	16234	1_1_46_0_0_0_0_0_0_0_0
122958	NG-428699	Bangladesh	2014	7822	24173;53476	225	16238	0_2_0_56_0_0_0_0_0_0_0
122959	NG-435545	Bangladesh	2014	1599	76175	1143	16239	0_0_71_0_0_0_0_0_0_0_0
175004	AUSMDU00043605	Australia	2020	7359	117544	223	51020	1_8_6_0_2_0_0_0_0_61_0	SRR26355757
175039	AUSMDU00047580	Australia	2020	1582	117579	62	50329	0_0_26_3_85_3_1_0_2_0_9	SRR26355971
175045	AUSMDU00048968	Australia	2020	7371	117585	34	51051	0_2_16_3_1_0_0_0_1_0_0	SRR26355963
