# Supplementary material for: Neisseria gonorrhoeae LIN codes provide a robust, multi-resolution lineage nomenclature
Source: eLife. 2025 Dec 31;14:RP107758. doi: 10.7554/eLife.107758 (PMC12755878; doi:10.7554/eLife.107758)
Supplement: Supplementary file 2. — This dataset comprises 3935 N. gonorrhoeae isolates, collating a representative range of Ng cgMLST v1 core genome groups (at allelic mismatch threshold 300). [file elife-107758-supp2.xlsx]

## Sheet: Sheet1
id	isolate	country	year	ST (MLST)	cgST (N. gonorrhoeae cgMLST v1)	Core genome group (Threshold 300 allelic mismatches)	cgST (N. gonorrhoeae cgMLST v2)	LINcode (N. gonorrhoeae cgMLST v2)	run_accession
2855	FA1090	USA	1980	1899	1;16470	404	1	6_0_1_0_1_0_0_0_0_0_0
13685	NCCP11945	South Korea	2005	1901	3	3	3	0_2_0_1_92_0_0_0_0_0_0
14729	MS-11	USA	1960	6959	4;16472;53968	406	4	0_0_0_0_0_0_0_0_0_0_0
15698	DGI2	USA		8421	5;16473;53969;69622	407	5	8_1_0_3_1_0_0_0_0_0_0
15935	PID24	USA		8418	6;16474;53864	408	6	0_12_8_0_0_0_0_0_0_1_0
15936	DGI18	USA		8418	7;16475;53865	408	7	0_12_8_0_0_0_0_0_0_0_0
21066	PID18	Unknown		1926	10;16477;53866;69624	410	10	8_1_0_1_1_0_0_0_0_0_0
21067	1291	Unknown		8422	69625	1019	11	0_0_7_0_0_0_0_0_0_0_0
21068	PID1	Unknown		10154	69626	1020	12	1_10_0_0_0_0_0_0_0_0_0
21070	F62	Unknown		1900	14;16481;24261;52066	413	14	6_0_0_0_0_0_0_0_0_0_0
21071	SK-92-679	Unknown		6715	5223;16482	13	15	0_2_65_0_0_0_0_0_0_0_0
26827	12028_2010	Ireland	2010	10682	17;16484;47786;53867;69627	410	17	8_1_0_0_0_0_0_0_0_0_0	ERR351670
27093	S359	UK [England]	1997	1918	69629	415	19	26_0_0_0_1_0_0_0_7_1_0	ERR029274
27133	S081	UK [England]	1995	1918	69637	415	28	26_0_0_0_1_0_0_0_2_0_0	ERR029246
27140	S058	UK [England]	1995	1918	69640	415	31	26_0_0_0_1_0_0_5_0_0_0	ERR029244
27150	S106	UK [England]	1995	1918	69646	415	37	26_0_0_0_1_0_0_0_0_5_0	ERR029247
27163	S293	UK [England]	1996	1918	69652	415	44	26_0_0_0_1_0_0_0_0_10_0	ERR029270
27185	S306	UK [England]	1996	1918	69659	415	54	26_0_0_0_1_0_0_0_0_8_0	ERR026600
27187	S152	UK [England]	1996	1918	69661	415	56	26_0_0_0_1_0_0_0_3_1_0	ERR026595
27192	S184	UK [England]	1996	1918	69665	415	60	26_0_0_0_1_0_0_0_0_21_0	ERR029243
27197	S241	UK [England]	1996	1918	69668	415	24;32;55	26_0_0_0_1_0_0_0_0_1_0	ERR026597
27198	S257	UK [England]	1996	1918	69669	415	63	26_0_0_0_1_0_0_0_12_0_0	ERR026590
27199	S522	UK [England]	1997	1918	69670	415	64	26_0_0_0_1_0_0_0_5_0_0	ERR026601
27201	S463	UK [England]	1997	1918	69672	415	66	26_0_0_0_1_0_0_0_9_0_0	ERR026605
27203	S514	UK [England]	1997	1918	69674	415	68	26_0_0_0_1_0_0_1_0_0_0	ERR026608
27204	S415	UK [England]	1997	1918	69675	415	18;69;26340	26_0_0_0_1_0_0_0_1_0_0	ERR049005
27206	S317	UK [England]	1997	1918	69677	415	54;71	26_0_0_0_1_0_0_0_0_8_0	ERR026603
27208	S414	UK [England]	1997	1918	69679	415	73	26_0_0_0_1_0_0_0_4_0_0	ERR049004
27215	S378	UK [England]	1997	1918	69686	415	18;69;26340	26_0_0_0_1_0_0_0_1_0_0	ERR048995
27221	S397	UK [England]	1997	1918	69692	415	72;76	26_0_0_0_1_0_0_0_0_2_0	ERR048998
27223	S382	UK [England]	1997	1918	69679;69694	415	73	26_0_0_0_1_0_0_0_4_0_0	ERR048997
27231	GCGS0062	USA	2009	1580	71;16547	16	82	0_2_1_0_65_0_0_0_0_0_0	ERR191791
27232	GCGS0138	USA	2010	9363	69	16	83	0_2_1_0_73_6_8_0_0_0_0	ERR223644
27238	GCGS0018	USA	2009	9363	74	16	89	0_2_1_0_73_6_0_9_0_0_0	ERR191747
27248	GCGS0176	USA	2010	9363	83	16	98	0_2_1_0_73_6_0_9_0_6_0	ERR223682
27252	GCGS0202	USA	2009	9363	88	16	102	0_2_1_0_73_6_0_9_0_2_0	ERR222901
27253	GCGS0136	USA	2010	9363	89	16	103	0_2_1_0_73_6_23_0_0_0_0	ERR223642
27254	GCGS0092	USA	2010	1580	93;69698	16	104	0_2_1_0_63_0_0_0_0_0_0	ERR191821
27255	GCGS0118	USA	2010	9363	90	16	105	0_2_1_0_73_6_0_0_2_1_0	ERR223624
27263	GCGS0218	USA	2009	9363	97	16	112	0_2_1_0_73_6_0_1_0_0_0	ERR222917
27270	GCGS0200	USA	2009	6722	69701	1021	119	14_1_0_2_0_0_0_0_0_0_0	ERR222899
27271	GCGS0064	USA	2009	1893	69702	31	120	0_2_29_12_3_0_0_0_0_0_0	ERR191793
27272	GCGS0212	USA	2009	1588	117;16558;54680	21	121	0_0_33_12_66_12_0_0_0_0_0	ERR222911
27274	GCGS0112	USA	2009	10310	119;16560;54681	416	123	0_0_18_4_0_0_0_0_0_0_0	ERR223618
27275	GCGS0210	USA	2009	1588	174;16561;54682	21	124	0_0_33_12_66_13_0_0_0_0_0	ERR222909
27276	GCGS0008	USA	2009	1588	290;16562	21	125	0_0_33_19_0_0_0_0_0_0_0	ERR191737
27277	GCGS0186	USA	2009	1588	297;16563;54683	21	126	0_0_33_12_66_1_0_0_0_0_0	ERR223692
27278	GCGS0216	USA	2009	1588	302;16564;54684	21	127	0_0_33_12_66_14_0_0_0_0_0	ERR222915
27280	GCGS154	USA	2009	8130	7738;16566	25	129	0_0_26_12_0_0_0_0_0_0_0	ERR223660
27281	GCGS0146	USA	2009	1588	308;16567;54686	21	130	0_0_33_12_66_8_0_0_0_0_0	ERR223652
27283	ERR191744	USA		10311	311;16568;23971;24263	24	132	0_0_43_10_1_0_0_0_0_1_0	ERR191744
27285	GCGS0082	USA	2009	10313	7741;16569	263	134	0_2_23_3_0_0_0_0_0_0_0	ERR191811
27292	GCGS0050	USA	2009	8154	112028	44	141	1_1_22_0_9_0_0_0_0_0_0	ERR191779
27301	GCGS0027	USA	2009	1901	133	3	149	0_2_0_1_0_0_20_1_0_1_0	ERR191756
27313	GCGS0046	USA	2009	1901	144	3	160	0_2_0_1_0_13_0_0_0_1_0	ERR191775
27317	GCGS0135	USA	2010	1901	150	3	164	0_2_0_1_0_4_0_4_0_7_0	ERR223641
27320	GCGS0054	USA	2009	1901	158;16581	3	167	0_2_0_1_134_7_0_1_0_1_0	ERR191783
27329	GCGS0157	USA	2010	1901	157	3	175;288	0_2_0_1_0_0_0_17_0_0_0	ERR223663
27349	GCGS0234	USA	2010	1901	178	3	195	0_2_0_1_119_0_0_0_1_1_0	ERR222933
27352	GCGS0115	USA	2010	1901	182	3	198	0_2_0_1_0_0_20_1_0_4_0	ERR223621
27357	GCGS0035	USA	2009	1901	187;16595	3	203	0_2_0_1_0_54_0_0_0_1_0	ERR191764
27364	GCGS0184	USA	2009	1582	201;16598;53874;69709	32	210	0_0_41_2_0_0_0_0_0_0_0	ERR223690
27378	GCGS0211	USA	2010	1580	215;16605	16	224	0_2_1_0_37_0_0_0_0_0_0	ERR222910
27387	GCGS0125	USA	2010	1901	216	3	233;283;315	0_2_0_1_0_4_0_4_0_0_0	ERR223631
27388	GCGS0141	USA	2010	1901	218	3	234	0_2_0_1_0_13_0_0_3_0_0	ERR223647
27390	GCGS0053	USA	2009	1901	222;16607	3	236	0_2_0_1_0_54_0_0_1_0_0	ERR191782
27397	GCGS0229	USA	2010	1901	228	3	243	0_2_0_1_0_0_0_0_0_9_0	ERR222928
27400	GCGS0081	USA	2009	1901	231	3	246	0_2_0_1_0_4_0_5_0_0_0	ERR191810
27408	GCGS0161	USA	2010	1580	245;16612	16	254	0_2_1_0_37_0_1_0_0_2_0	ERR223667
27418	GCGS0057	USA	2009	1901	250	3	263	0_2_0_1_0_4_0_0_0_2_0	ERR191786
27422	GCGS0004	USA	2009	1901	253	3	267	0_2_0_1_121_0_0_0_1_0_0	ERR191733
27424	GCGS140	USA	2010	1901	261;16618	3	269	0_2_0_1_119_0_0_0_1_5_0	ERR223646
27425	GCGS0158	USA	2009	1901	255	3	270	0_2_0_1_111_0_0_0_0_0_0	ERR223664
27437	GCGS0056	USA	2009	1901	274	18	282	0_0_12_2_3_12_0_0_0_0_0	ERR191785
27446	GCGS0205	USA	2010	1901	278	3	291	0_2_0_1_0_0_25_0_0_1_0	ERR222904
27449	GCGS0088	USA	2009	1901	281	3	294	0_2_0_1_0_53_0_0_0_1_0	ERR191817
27450	GCGS0106	USA	2010	8126	287	16	295	0_2_1_0_26_6_0_0_0_0_0	ERR223612
27459	GCGS0016	USA	2009	1893	69714	31	304	0_2_29_7_1_0_0_0_1_0_0	ERR191745
27465	ERR173153	Unknown		1902	69715	1023	310	0_0_7_2_0_0_0_1_0_0_0	ERR173153
27466	GCGS0034	USA	2009		295;69716	34	311	0_2_16_0_0_1_0_1_0_0_0	ERR191763
27468	ERR173151	Unknown		1902	69717	1023	313	0_0_7_2_0_0_0_0_0_0_0	ERR173151
27470	GCGS0101	USA	2010	1901	299	3	315	0_2_0_1_0_4_0_4_0_0_0	ERR223607
27471	GCGS0072	USA	2009	10316	69718	1024	316	22_0_1_0_0_0_0_0_0_0_0	ERR191801
27472	GCGS0162	USA	2009	10317	112029	41	317	1_1_2_9_0_0_0_0_0_0_0	ERR223668
31339	W0550	UK [England]	2004	1901	327;16643	18	337;361	0_0_12_2_13_0_0_0_0_2_0	ERR234389
31341	W0561	UK [England]	2004	1901	329	18	339;351;358	0_0_12_2_3_0_4_0_0_0_0	ERR234391
31345	W0587	UK [England]	2004	1901	333	18	343	0_0_12_2_3_0_0_0_9_0_0	ERR234395
31347	W0603	UK [England]	2004	1901	335;347;16644	18	339;351;358	0_0_12_2_3_0_4_0_0_0_0	ERR234397
31349	W0611	Unknown		1901	337;16645	18	339;351;358	0_0_12_2_3_0_4_0_0_0_0	ERR234399
31351	W0618	Unknown		1901	339;16646	18	336;345	0_0_12_2_3_0_0_0_9_4_0	ERR234401
31359	W0789	UK [England]	2004	1901	347;16647	18	351	0_0_12_2_3_0_4_0_0_0_0	ERR234409
31361	W0885	UK [England]	2004	1901	349	18	353;377	0_0_12_2_3_0_0_0_7_0_0	ERR234411
31362	LG0186	UK [England]	2004	1901	350	18	354	0_0_12_2_3_0_0_0_0_17_0	ERR234413
31363	LG0394	UK [England]	2004	1901	351	18	355	0_0_12_2_3_0_0_0_9_8_0	ERR234414
31367	LG1515	Unknown		1901	355	18	359	0_0_12_2_3_0_0_0_0_8_0	ERR234418
31368	LG1721	UK [England]	2004	1901	356;16650	18	360	0_0_12_2_3_0_13_3_0_0_0	ERR234419
31376	LG1736	UK [England]	2004	1901	364	18	368	0_0_12_2_3_0_0_0_8_0_0	ERR234427
31377	LG1861	UK [England]	2004	1901	365	18	369	0_0_12_2_3_0_0_0_9_0_0	ERR234428
31380	LG0675	UK [England]	2004	1901	368	18	372	0_0_12_2_3_0_0_0_9_10_0	ERR234431
31381	LG1114	UK [England]	2004	1901	369;16653	18	373	0_0_12_2_3_0_0_0_0_15_0	ERR234432
31386	LG0211	UK [England]	2004	1901	374	18	378	0_0_12_2_3_0_0_0_9_10_0	ERR234437
31389	LG1126	UK [England]	2004	1901	377	18	381	0_0_12_2_3_0_0_0_0_0_1	ERR234440
31395	LG0493	UK [England]	2004	1901	383	18	387	0_0_12_2_3_0_0_0_0_0_0	ERR234446
31397	LG1132	UK [England]	2004	1901	385	18	389	0_0_12_2_3_0_12_0_0_0_0	ERR234448
31399	LG1628	UK [England]	2004	1901	387	18	391	0_0_12_2_3_0_0_0_9_1_0	ERR234450
31406	LG1349	UK [England]	2004	1901	394	18	398	0_0_12_2_3_0_0_0_9_12_0	ERR234457
31408	LG1745	UK [England]	2004	1901	396	18	400	0_0_12_2_3_0_0_0_0_8_0	ERR234459
31409	W0204	UK [England]	2004	1901	397	18	401	0_0_12_2_3_0_0_0_9_10_0	ERR234460
31412	LG0790	UK [England]	2004	1901	400	18	404	0_0_12_2_3_0_0_0_9_3_0	ERR234463
31413	LG1137	UK [England]	2004	1901	401	18	405	0_0_12_2_3_0_0_0_5_0_0	ERR234464
31417	W0239	UK [England]	2004	1901	405	18	408	0_0_12_2_3_0_0_0_9_10_0	ERR234468
31420	LG0795	UK [England]	2004	1901	408	18	333;342;382;384;387;392;410;438	0_0_12_2_3_0_0_0_0_0_0	ERR234471
31423	LG1636	UK [England]	2004	1901	411	18	413	0_0_12_2_3_0_0_0_9_13_0	ERR234474
31425	W0251	UK [England]	2004	1901	413;16654	18	415	0_0_12_2_3_0_0_0_9_19_0	ERR234476
31429	LG1244	Unknown		1901	417	18	419	0_0_12_2_3_0_0_0_0_0_3	ERR234480
31430	LG1423	UK [England]	2004	1901	418	18	347;359;367;375;400;403;429;435	0_0_12_2_3_0_0_0_0_8_0	ERR234481
31431	LG1644	UK [England]	2004	1901	419	18	420	0_0_12_2_3_0_0_0_9_9_0	ERR234482
31434	LG0353	UK [England]	2004	1901	422;16655	18	423	0_0_12_2_3_0_0_0_9_16_0	ERR234485
31439	LG1685	Unknown		1901	427	18	428	0_0_12_2_3_0_0_0_9_0_0	ERR234490
31441	W0264	UK [England]	2004	1901	429	18	356;357;365;379;397;417;419;430;441	0_0_12_2_3_0_0_0_0_0_3	ERR234492
31442	LG0355	UK [England]	2004	1901	430;16657	18	431	0_0_12_2_3_0_0_0_9_18_0	ERR234493
31443	LG0640	UK [England]	2004	1901	431	18	370;432	0_0_12_2_3_0_0_0_0_9_0	ERR234494
31446	LG1477	UK [England]	2004	1901	434	18	435	0_0_12_2_3_0_0_0_0_8_0	ERR234497
31448	LG1834	UK [England]	2004	1901	436	18	437	0_0_12_2_3_0_4_0_0_1_0	ERR234499
31449	W0296	UK [England]	2004	1901	437	18	438	0_0_12_2_3_0_0_0_0_0_0	ERR234500
31451	LG0660	UK [England]	2004	1901	439	18	440	0_0_12_2_3_0_0_0_9_1_0	ERR234502
31455	LG1719	UK [England]	2004	1901	443;47798	18	444	0_0_12_2_3_27_0_0_0_0_0	ERR234506
31461	WHO_O	Canada	1991	1902	470;16662;24961	42	450	0_0_8_0_0_0_0_0_0_0_0	ERR349899
31467	GC_0817358	Spain	2008	8114	69728	44	456	1_1_22_9_0_2_0_1_0_0_0	ERR349998
31469	BEL_09_4	Belarus	2009	1892	481;16667;23976;47802;56315;69730	425	458	1_8_3_1_0_0_0_0_0_0_0	ERR350021
31471	10868_8_44	Belarus	2009	1594	485;16669;47804	414	460	1_8_5_0_48_0_0_0_0_0_0	ERR350023
31472	BEL_09_43	Belarus	2009	1601	69732	426	461	0_0_0_2_0_0_0_0_0_0_0	ERR350024
31473	BEL_09_44	Belarus	2009	1901	317;16671;47806;69733	3	462	0_2_0_1_128_0_0_0_0_0_0	ERR350025
31476	BEL_09_28	Belarus	2009	1595	487;16673;47809;69734	427	465	1_1_35_0_0_0_0_0_0_0_0	ERR350029
31477	BEL_09_37	Belarus	2009	8126	465	16	466	0_2_1_0_26_3_0_0_0_0_0	ERR350030
31479	EST_10_6	Estonia	2010	11175	488;16675;23978;52070;53971;56317;69735	428	468;807	13_0_0_0_0_0_0_0_0_0_0	ERR350036
31482	EST_10_18	Estonia	2010	1594	495;16678;47812	414	471	1_8_5_0_23_0_0_0_0_0_0	ERR350039
31483	EST_10_22	Estonia	2010	1931	112033	1029	472	1_1_15_0_0_0_0_0_0_0_0	ERR350040
31484	EST_10_25	Estonia	2010	1901	472;16680;47814	3	473	0_2_0_1_165_0_0_0_0_0_0	ERR350041
31487	BEL_10_59M	Belarus	2010	1595	496;16682;47817;69739	427	476	1_1_35_0_1_0_0_0_0_0_0	ERR350050
31494	SI10_15	Slovenia	2010	1901	460	3	483	0_2_0_1_0_0_0_0_17_0_0	ERR350065
31496	SI10_28	Slovenia	2010	10241	506;16689;47821;69744	429	485	0_2_1_11_0_0_0_0_0_0_0	ERR350067
31498	EST_11_14	Estonia	2011	1588	69746	21	487	0_0_33_12_52_0_0_0_0_1_0	ERR350070
31499	EST_11_17	Estonia	2011	11175	514;16692;23980;53972;56323;69747	428	488;832	13_0_0_0_0_0_0_0_1_0_0	ERR350071
31504	316/-11	Germany	2011	1901	9654;16695	3	493	0_2_0_1_27_31_0_0_0_0_0	ERR352672
31508	POL_11_139	Poland	2011	1901	474	3	497	0_2_0_1_0_0_10_0_0_0_0	ERR352696
31509	POL_11_148	Poland	2011	10932	527;16698;56325	304	498;901	0_0_1_0_25_0_0_1_0_0_0	ERR352698
31510	SI11-15	Slovenia	2011	7823	69749	133	499	0_2_9_6_1_0_0_0_0_0_0	ERR352708
31511	EST_12_19	Estonia	2012	1588	528;16700;47831;69750	21	500	0_0_33_2_6_0_0_0_0_0_0	ERR352710
31512	EST_12_26	Estonia	2012	6726	529;16701;47832;52073;69751	431	501	41_0_0_0_7_0_0_0_0_0_0	ERR352718
31517	SI12-18	Slovenia	2012	1580	505	16	506;825	0_2_1_0_54_0_0_0_0_0_0	ERR352741
31519	SI12-44	Slovenia	2012	1582	69752	416	508	0_0_18_3_3_2_0_0_0_0_0	ERR352747
31521	NG9803	Japan	1998	7363	493	8	510;6642	0_2_17_0_0_8_0_0_0_7_0	ERR352763
31522	989000018	China	1998	1580	510;47836	56	511	0_2_6_0_0_1_0_0_0_0_0	ERR352767
31523	989000168	China	1998	11178	511;16705;47837;52074;53836	57	512	0_2_33_1_0_0_0_0_0_0_0	ERR352769
31525	989000443	China [Hong Kong]	1998	11077	535;16707;23983;47839;52075	432	514;818	0_13_2_1_0_0_0_0_0_0_0	ERR352775
31526	989000163	Indonesia	1998	6715	538;16708;24267;47840;53973;69753	433	515	0_20_2_0_0_0_0_0_0_0_0	ERR352779
31528	989000021	Philippines	1998	10634	516;16710;47841;53974	60	517	14_1_0_1_0_0_0_0_0_0_0	ERR352788
31529	989000027	Philippines	1998	1583	9661;16711;47842;53975;69755	389	518;581	0_2_20_0_0_0_0_0_0_0_0	ERR352792
31531	989000039	Philippines	1998	1582	69757	416	520	0_0_18_13_0_0_0_0_0_0_0	ERR352796
31533	989000070	Thailand	1998	7371	497;16715;47844;52076;53976;69758	306	522	0_8_1_0_0_0_0_0_0_0_0	ERR352811
31534	989000077	Thailand	1998	1903	9662;16716;23984;69759	64	523;840	0_2_37_0_0_1_0_0_0_0_0	ERR352813
31535	989000080	Thailand	1998	1583	501;16717;47845;52077;69760	307	524	0_2_32_0_0_0_0_0_0_0_0	ERR352815
31536	989000438	Unknown		10634	524;16718;47846;52078;53977;56328;69761	66	525	0_20_1_0_0_0_0_0_0_0_0	ERR352829
31538	999000076	Unknown		1919	69762;88576	24	527	0_0_43_2_0_0_0_0_0_0_0	ERR352839
31539	999000079	Unknown		12077	560;16721;24966;47848;52079;69763	434	528	40_0_0_0_0_0_0_0_0_0_0	ERR352841
31540	999000049	Unknown		1590	561;16722;23985;47849;56330	435	529	0_12_2_0_1_0_0_0_2_0_0	ERR352843
31541	999000099	Unknown		1582	563;24967;47850	416	530	0_0_18_14_0_0_0_0_0_0_0	ERR352845
31543	999000020	Unknown		7371	503;16724;47852;52080;69764	306	532	0_8_1_0_1_0_0_0_0_0_0	ERR352849
31544	IN_09_3306	India	2009	1600	69765	1031	533	0_0_48_0_0_0_0_0_0_0_0	ERR363643
31545	IN_10_167	India	2010	11180	533;16726;47854;53978	71	534	0_2_26_0_0_0_0_0_0_0_0	ERR363648
31547	IN_10_1148	India	2010	11181	69767	24	536	0_0_43_3_0_0_0_0_0_0_0	ERR363657
31548	IN_10_104	Bhutan	2010	8776	536;16729;24269;24968;47857	390	537	0_18_1_10_0_1_0_0_0_0_0	ERR363660
31549	IN_10_116	Bhutan	2010	8776	537;16730;24969;47858	390	538	0_18_1_10_1_0_0_0_0_0_0	ERR363661
31550	BX4109	Pakistan	2010	1588	576;16731;47859;56331;69768	21	539	0_0_33_2_10_0_0_0_0_0_0	ERR363667
31553	989000034	Cuba	1998	11182	112035	41	542	1_1_7_0_0_0_0_0_0_0_0	ERR349888
31554	989000209	Cuba	1998	11183	112036	1035	543	1_1_13_0_0_0_0_0_0_0_0	ERR349889
31555	989000277	Cuba	1998	1931	112037	1035	544	1_1_13_0_1_0_0_0_0_0_0	ERR349890
31556	989000371	Cuba	1998	11184	504;16736;23989	308	545	0_2_11_0_0_0_0_0_0_0_0	ERR349891
31557	989000062	Jamaica	1998	11185	69773	1036	546	1_1_4_2_0_0_0_0_0_0_0	ERR349892
31558	989000310	Jamaica	1998	8163	583;16738;69774	439	547	5_2_0_1_18_0_0_0_0_0_0	ERR349893
31559	GC_0809944	Brazil	2008	1583	585;16739;23991;47864;53981;69775	440	548	18_0_2_0_0_0_0_0_0_0_0	ERR349895
31561	14_358	Ecuador	2008	11186	69776	1037	550	1_1_30_0_0_0_0_0_0_0_0	ERR349897
31562	WHO_F	Canada	1991	10934	590;16741;24971;52082;53982;69777;88577	441	551;29651	34_0_0_0_0_0_0_0_0_0_0	ERR349898
31563	989000059	USA	1998		9668;16742	83	552	0_2_18_0_1_0_0_0_0_0_0	ERR349900
31568	259000214	UK	1986	1931	112039	41	557	1_1_1_0_0_0_0_0_0_0_0	ERR349907
31572	259000216	UK	1990	1906	600;16748;23995;47869;80138	442	561	42_0_0_0_2_0_0_0_0_0_0	ERR349911
31573	259000213	UK	1993	8152	605;16749;23996;40989;47870;53877;56333;69782	443	562	4_0_2_0_0_0_0_0_0_0_0	ERR349912
31574	259000221	UK	1993	11181	515;24270;47871	311	563	14_0_0_0_0_0_0_0_0_0_0	ERR349913
31575	259000222	UK	1993	10899	69783	1019	564	0_0_7_1_0_0_0_0_0_0_0	ERR349914
31577	259000224	UK	1993	1920	69784	1039	566	0_0_45_0_0_0_0_0_0_0_0	ERR349916
31578	989000124	Denmark	1998	1579	69785	24	567	0_0_43_1_0_2_0_0_0_0_0	ERR349919
31579	989000439	Germany	1998	6726	620;16753;47874;52083;69786	431	568	41_0_0_0_3_0_0_0_0_0_0	ERR349927
31580	989000145	Greece	1998	1902	568;47875;56335	42	569	0_0_8_1_0_0_0_0_0_1_0	ERR349929
31581	989000146	Greece	1998	1902	569;47876;56336	42	570	0_0_8_1_0_0_0_0_0_0_0	ERR349930
31582	989000120	Norway	1998	1591	622;16754;23997;47877;53984;69787	485	571	11_0_1_0_0_0_0_0_0_0_0	ERR349936
31584	989000170	Poland	1998	1601	625;16756;40990;47879;53985	426	573	0_0_0_1_1_0_0_0_0_0_0	ERR349938
31585	989000352	Romania	1998	1902	573;16757	42	574	0_0_8_1_1_0_0_0_0_0_0	ERR349939
31586	989000380	Russia	1998	11188	574;16758;47880	90	575	0_2_7_3_0_0_0_0_0_0_0	ERR349940
31587	989000257	Russia	1998	9903	575;16759;47881;53878;53945	90	576	0_2_7_4_0_0_0_0_0_0_0	ERR349941
31588	989000326	Russia	1998	1892	69789	425	577	1_8_3_3_0_0_0_0_0_0_0	ERR349942
31590	989000404	Spain	1998	1595	629;16762;47883;69791;119505	442	579	42_0_0_1_0_0_0_0_0_0_0	ERR349945
31592	989000026	UK	1998	1583	9673;16764;47884;53986;69793	389	581	0_2_20_0_0_0_0_0_0_0_0	ERR349951
31594	999000056	The Netherlands	1999	12078	582;16765;36043	90	583	0_2_7_0_0_0_0_0_0_0_0	ERR349959
31598	05_590_290	Russia	2004	6810	112042	447	587	1_1_21_1_0_0_0_0_0_0_0	ERR349978
31601	02201	The Netherlands	2008	1901	540	3	590	0_2_0_1_0_0_0_0_7_0_0	ERR349982
31602	GC_0806956	Armenia	2008	1892	69796	425	591	1_8_3_0_14_0_0_0_0_0_0	ERR349984
31606	590_345	Unknown		1596	635;16771	21	595	0_0_33_12_24_0_0_0_0_0_0	ERR349992
31608	590_277	Poland	2008	11189	69798	1040	597	0_20_6_0_0_0_0_0_0_0_0	ERR349994
31611	GC_0804060	Spain	2008	1901	599;40992	18	600	0_0_12_2_3_14_0_1_0_0_0	ERR350000
31616	SI08_05	Unknown		8126	604	16	605	0_2_1_0_27_0_0_0_0_0_0	ERR350005
31621	NO_09_3583	Norway	2009	11191	609;16780;47895	96	610	0_18_8_0_0_0_0_0_0_0_0	ERR350012
31624	NO_09_3616	Norway	2009	8153	612;16782;47896;80139	3	613	0_2_0_1_152_0_0_0_0_0_0	ERR350015
31626	NO_09_HUS20	Norway	2009	1588	646;16784;47897;56343	21	615;893	0_0_33_3_1_0_0_0_0_0_0	ERR350018
31627	EST_09_5	Estonia	2009	8776	652;16785;47898;52088;53987;56344;69806	449	616;769;894	31_1_0_0_0_0_0_0_0_0_0	ERR350019
31634	10_590_246	Spain	2010	1901	584	3	623	0_2_0_1_0_112_0_0_0_0_0	ERR350052
31635	POL_10_5	Poland	2010	10932	657;16789;56347	304	624	0_0_1_0_2_0_0_0_0_0_0	ERR350054
31639	POL_10_22	Poland	2010	7363	586;16793;47903	315	628	0_7_1_0_0_0_0_0_0_0_0	ERR350059
31640	SI10_05	Slovenia	2010	1588	675;16794;56350	21	629	0_0_33_12_3_6_0_0_0_0_0	ERR350063
31651	SI11-10	Slovenia	2011	8131	683;16798;47907	42	640	0_0_8_1_5_0_0_0_0_0_0	ERR352704
31652	SI11-14	Slovenia	2011	1901	606	3	641;764	0_2_0_1_0_0_0_0_3_0_0	ERR352706
31653	EST_12_20	Estonia	2012	11175	684;16799;24004;52090;53988;56354;69813	428	642	13_0_0_0_0_0_0_0_2_1_0	ERR352712
31654	EST_12_21	Estonia	2012	1931	112045	1029	643	1_1_15_0_0_0_0_0_0_0_0	ERR352714
31659	POL_12_187	Poland	2012	1901	616;16804	3	648	0_2_0_1_27_26_0_0_0_0_0	ERR352730
31662	215/-02	Thailand	1979	1920	689;16806;47911;53989;56357	451	651	0_0_3_0_0_0_0_0_0_0_0	ERR352749
31663	WHO_M	Australia	1992	7367	651	95	652	0_2_4_0_0_0_0_0_0_0_0	ERR352751
31664	WHO_L	Australia	1996	1590	690;16807;24006;56358;96018	435	653;36563	0_12_2_0_5_0_0_0_0_0_0	ERR352753
31665	WHO_J	Australia	1996	1599	69816	1041	654	0_2_31_0_0_0_0_0_0_0_0	ERR352755
31666	WHO_I	Australia	1997	1890	694;16809;53879;53946	409	655	0_12_3_0_0_0_0_0_0_0_0	ERR352757
31669	989000269	China	1998	11193	695;16811;47913;53880;53947	57	658	0_2_33_0_0_0_0_0_0_0_0	ERR352771
31670	989000050	Indonesia	1998	7365	9684;16812;40993;47914	317	659	0_2_57_0_0_0_0_0_0_0_0	ERR352777
31671	989000181	Malaysia	1998	7367	659;16813	83	660	0_2_18_0_0_0_0_0_0_0_0	ERR352786
31672	989000294	Philippines	1998	11194	9685;16814;47915;69817;79329	104	661	0_2_41_0_0_0_0_0_0_0_0	ERR352801
31673	989000441	Philippines	1998	10634	9686;16815;47916;53881;53948	60	662	14_1_0_0_0_0_0_0_0_0_0	ERR352805
31674	989000019	Thailand	1998	11195	662;16816;47917	105	663;866	0_0_12_0_0_0_0_0_0_0_0	ERR352807
31675	989000060	Thailand	1998	1583	663;16817;40994;47918;53990	106	664	0_0_56_0_0_1_0_0_0_0_0	ERR352809
31676	989000091	Thailand	1998	11196	9687;16818;47919;52091	107	665	0_2_19_0_0_0_0_0_0_0_0	ERR352817
31678	989000104	Thailand	1998	11197	666;47921	108	667	0_15_1_0_0_0_0_0_0_0_0	ERR352821
31679	989000142	Unknown		1583	667;16820;40995;53991	106	668	0_0_56_0_0_0_0_0_0_0_0	ERR352825
31680	989000176	Unknown		6720	668;16821;47922;53992;56359;69819	391	669	0_2_25_0_0_0_0_0_0_0_0	ERR352827
31683	999000133	Unknown		11198	699;16823;47925;52092;53993	432	672	0_13_2_2_0_0_0_0_0_0_0	ERR352837
31684	999000023	Unknown		1903	9689;9712;24008;24039;47926;48016;69821;69891	64	673;824	0_2_37_0_2_0_0_0_0_0_0	ERR352851
31685	GCGS0013	USA	2009	10311	69822	24	674	0_0_43_10_0_0_0_0_0_0_0	ERR355924
31686	GCGS0015	USA	2009	10311	703;16825;24010;24276	24	675	0_0_43_10_1_0_0_0_0_0_0	ERR355925
31687	999000027	Thailand	1999	1590	704;16826;24011;47927;56360	435	676	0_12_2_0_1_0_0_0_0_0_0	ERR363576
31688	999000072	Thailand	1999	1582	705;16827;47928	454	677	0_0_24_0_0_0_0_0_0_0_0	ERR363577
31689	999000085	Thailand	1999	1601	9691;16828;47929	392	678	0_0_54_0_0_0_0_0_0_0_0	ERR363578
31690	999000116	Thailand	1999	7369	69823	1042	679	17_0_0_0_0_0_0_0_0_0_0	ERR363579
31691	NG0031	Japan	2000	7363	636	8	680	0_2_17_0_0_10_0_0_0_0_0	ERR363580
31694	NG0005	Japan	2000	1590	706;16831;24012;56361;96019	435	683;36564	0_12_2_0_6_0_0_0_0_0_0	ERR363585
31695	WHO_K	Japan	2003	7363	642;16832	8	684	0_2_17_0_0_19_0_0_0_0_0	ERR363595
31701	IN_07_1808	India	2007	11199	710;16837;24014;47933;52093;53994	455	690	0_0_5_0_0_0_0_0_0_0_0	ERR363609
31703	08_590_382	China	2008	6715	691;16838;24015;47935;56362	133	692	0_2_9_13_0_0_0_0_0_0_0	ERR363612
31705	08_590_215	Indonesia	2008	1891	9693;16839;47936;56363;69827	394	694	0_6_0_1_0_0_0_0_0_0_0	ERR363614
31707	08_590_372	Philippines	2008	11200	714;16841;47938;53995	456	696	0_17_0_0_0_0_0_0_0_0_0	ERR363619
31709	IN_09_3090	India	2009	12079	69828	1043	698	25_0_0_0_0_0_0_0_0_0_0	ERR363637
31711	IN_09_3293	India	2009	8134	720;16845;47942	37	700	0_0_47_16_0_0_0_0_0_0_0	ERR363639
31713	IN_09_3782	India	2009	11181	69831	24	702	0_0_43_3_1_0_0_0_0_0_0	ERR363641
31716	BX6956	Pakistan	2009	11074	69833	37	705	0_0_47_1_5_0_0_0_0_0_0	ERR363645
31720	IN_10_1457	India	2010	8775	736;16853;24282;47950;53996;69837;109224	459	709	0_20_0_0_0_2_0_0_0_0_0	ERR363650
31721	IN_10_1412	India	2010	1927	737;16854;47951;53997	460	710	0_12_1_0_0_0_0_0_0_0_0	ERR363651
31722	IN_10_1221	India	2010	6813	738;16855;47952;53883;53950;56365	461	711	0_0_6_0_0_0_0_0_0_0_0	ERR363652
31723	IN_10_1820	India	2010	11191	711;16856;24016;24283;47953;56366	124	712	0_18_7_0_1_0_0_0_0_0_0	ERR363653
31724	IN_10_1832	India	2010	11204	69838	1044	713	0_18_1_11_0_0_0_0_0_0_0	ERR363654
31725	IN_10_1877	India	2010	1927	739;16858;47955;53998	460	714	0_12_1_0_0_0_1_0_0_0_0	ERR363655
31726	IN_10_95	Bhutan	2010	11205	740;16859;53884;53951;56367	462	715	0_0_6_1_0_0_0_0_0_0_0	ERR363658
31727	IN_10_195	Bhutan	2010	11205	744;16860;53885;53952;56368	462	716	0_0_6_1_0_0_0_0_0_0_0	ERR363659
31728	IN_10_151	Bhutan	2010	8776	716;16861;24285;24980;47956	390	717;719	0_18_1_10_0_0_0_0_0_0_0	ERR363662
31729	IN_10_152	Bhutan	2010	8776	717;16862;24286;24981;47957	390	718	0_18_1_10_0_2_0_0_0_0_0	ERR363663
31730	IN_10_145	Bhutan	2010	8776	718;16863;24982;47958	390	719	0_18_1_10_0_0_0_0_0_0_0	ERR363664
31735	BX2715	Pakistan	2011	1599	69841;109225	1045	724	0_2_22_0_0_0_0_0_0_0_0	ERR363670
31738	989000202	Greece	1998	1583	726;16870;47964	90	727	0_2_7_1_0_0_0_0_0_0_0	ERR349932
31740	KN13_110	Japan	2001	1596	728;16871	8	729	0_2_17_0_5_0_1_0_0_0_0	ERR363594
31742	989000022	Philippines	1998	1580	730;47965	56	731	0_2_6_0_0_0_0_0_0_0_0	ERR352790
31745	989000243	Germany	1998	11207	759;16872;47966;56371	409	733	0_12_0_2_1_0_0_0_0_0_0	ERR349926
31746	989000127	Thailand	1998	1590	764;16873;24018;47967;56372	435	734	0_12_2_0_1_0_0_0_1_0_0	ERR352823
31747	03_590_188	UK	2003	1590	768;16874;24019;40996;47968;56373	435	735	0_12_2_0_2_0_0_1_0_0_0	ERR349965
31751	999000113	Spain	1999	1902	779;16878;47972	42	739	0_0_8_1_2_0_0_0_0_0_0	ERR349957
31755	05_590_10	Australia	2004	7365	742;16882;24020;69844	64	743	0_2_37_0_3_0_0_0_0_0_0	ERR363599
31756	NG0106	Japan	2001	7363	743;47976;52095	130	744	0_2_34_0_0_0_0_0_0_0_0	ERR363587
31757	08_590_48	Thailand	2008	8130	786;16883;47977;49783;69845	546	745	0_0_29_0_0_0_0_0_0_0_0	ERR363622
31758	WHO_G	Australia	2007	1903	745;16884;24021;69846	64	746;3392;26359	0_2_37_0_0_0_0_0_0_0_0	ERR363606
31759	BEL_10_23	Belarus	2010	1892	69847;101486	425	747	1_8_3_5_0_0_0_0_0_1_0	ERR350045
31761	05_590_342	Russia	2004	1902	789;16887;47980	42	749	0_0_8_1_4_0_0_0_0_0_0	ERR349972
31763	989000201	Greece	1998	11197	750;47981	108	751	0_15_1_0_1_0_0_0_0_0_0	ERR349931
31764	WHO_N	Australia	2001	1583	751;16889;53999;69849	132	752;1047;3477;19715;26361	0_2_38_0_0_0_0_0_0_0_0	ERR363586
31765	989000432	Turkey	1998	1902	752;47982	42	753	0_0_8_1_9_0_0_0_0_0_0	ERR349948
31767	08_590_64	China	2008	7822	665;16891;47984	133	755	0_2_9_14_4_0_0_0_0_0_0	ERR363610
31776	229/-12	Unknown		1901	679	3	764	0_2_0_1_0_0_0_0_3_0_0	ERR352676
31779	08_590_79	Thailand	2008	8145	69853	1046	767	0_2_58_0_0_0_0_0_0_0_0	ERR363625
31780	08_590_93	Unknown		8130	766;16900;47992	62	768	0_0_26_1_0_0_0_0_0_0_0	ERR363617
31781	EST_09_10	Estonia	2009	8776	794;16901;47993;52097;54000;56378;69854	449	769	31_1_0_0_0_0_0_0_0_0_0	ERR350020
31789	989000395	USA	1998	1584	112051	41	777	1_1_2_0_0_0_0_0_0_0_0	ERR349903
31795	05_590_371	UK [Scotland]	2004	8122	69866	446	783	19_0_1_0_0_12_0_0_0_0_0	ERR349966
31796	08_590_193	Thailand	2008	8112	69867;98356	243	784;38614	1_1_17_8_0_0_0_0_0_0_0	ERR363628
31798	989000355	France	1998	12080	813;16917;24028;47999;52100;54002	465	786	11_0_3_0_0_0_0_0_0_0_0	ERR349923
31799	05_590_339	Russia	2004	6810	112055	1048	787	1_1_21_0_0_0_0_0_0_0_0	ERR349975
31801	590_44	Germany	2008	10622	819;16920;48001;54004;69871	467	789	0_20_4_0_0_0_0_0_0_0_0	ERR349990
31802	05_590_374	UK [Scotland]	2005	8148	69872	1049	790	5_0_0_0_0_0_0_0_0_1_0	ERR349979
31803	BX8371	Pakistan	2008	1902	825;16922	42	791	0_0_8_1_7_0_0_0_0_0_0	ERR363632
31804	03_590_99	Denmark	2002	8122	69873	446	792	19_0_1_0_0_0_5_0_1_0_0	ERR349963
31805	05_590_249	Russia	2004	1905	829;16924;24029;48003;53886	469	793	3_0_0_0_0_0_0_0_0_0_0	ERR349970
31806	05_590_281	Russia	2004	6726	830;16925;48004;52101;69874	431	794	41_0_0_0_4_0_0_0_0_0_0	ERR349977
31808	989000335	Hungary	1998	6726	835;16927;48005;52102;69876	431	796	41_0_0_0_0_0_0_0_0_0_0	ERR349933
31811	08_590_81	Thailand	2008	8776	796;16930;24031;24289;48006	236	799	0_18_1_4_0_0_0_0_0_0_0	ERR363627
31812	05_590_273	Russia	2004	11212	797;16931;24032;24290;48007	142	800	0_18_12_0_0_0_0_0_0_0_0	ERR349976
31813	IN_09_2768	India	2009	8775	844;16932;24987;48008;54006;69878;109227	459	801	0_20_0_0_0_1_0_0_0_0_0	ERR363636
31814	IN_08_1570	India	2008	8775	850;16933;24291;48009;54007;69879;109228	459	802	0_20_0_0_0_0_0_1_0_0_0	ERR363633
31815	989000114	Indonesia	1998	1931	112056	143	803	1_1_25_0_0_0_0_0_0_0_0	ERR352781
31816	999000135	Turkey	1999	7369	69880	1042	679	17_0_0_0_0_0_0_0_0_0_0	ERR349961
31817	989000407	The Netherlands	1998	11188	69881	1050	804	14_0_1_0_0_0_0_0_0_0_0	ERR349947
31835	999000049	Unknown		1590	876;16950;24038;48014;53887;53953	435	822	0_12_2_0_1_0_0_0_2_0_0	ERR388465
31836	999000020	Unknown		7371	727;16951;48015;52104;69890	306	823	0_8_1_0_1_0_0_0_0_0_0	ERR388468
31837	999000023	Unknown		1903	9712;24039;48016;69891	64	824	0_2_37_0_2_0_0_0_0_0_0	ERR388469
31848	999000133	Unknown		11198	886;16959;24042;48018;52105;54008	432	672	0_13_2_2_0_0_0_0_0_0_0	ERR388462
31867	BEL_10_73	Belarus	2010	1901	763;48021	3	851	0_2_0_1_95_0_0_0_0_0_0	ERR388348
31883	999000079	Unknown		12077	900;16981;24991;48023;52106;69906	434	867	40_0_0_0_0_0_0_0_0_0_0	ERR388464
31896	989000114	Indonesia	1998	1931	112060	143	878	1_1_25_0_0_0_0_0_0_1_0	ERR388435
31905	590_302	Unknown		11177	916;16999;24045;24992;48025;52107;56410;69917	430	885	45_0_0_0_2_0_0_0_0_0_0	ERR388301
31931	WHO_M	Philippines	1992	7367	913	95	652;908;3399;26290	0_2_4_0_0_0_0_0_0_0_0	ERR388420
31942	BX2887	Unknown		11191	924;17023;48029;52109;69926	145	918	0_18_10_0_0_0_0_0_0_0_0	ERR449456
31944	BX290	Pakistan	2011	1903	69928	37	920	0_0_47_1_2_0_0_0_0_0_0	ERR449458
31946	BX596	Pakistan	2011	11228	9736;17027;48033	146	922	0_18_9_0_0_0_0_0_0_0_0	ERR449460
31949	BX3245	Unknown		11181	69930	24	925	0_0_43_4_0_0_0_0_0_0_0	ERR449463
31950	BA4664	Unknown		12081	963;17031;41002;48036;52110;69931	470	926	39_0_0_0_0_0_0_0_0_0_0	ERR449464
31952	03_87	Vietnam	2011	10313	852;17033;48037;56426	263	928	0_2_23_1_0_0_0_0_0_0_0	ERR449466
31953	09_11	Vietnam	2011	1600	935;17034;41003;48038;54009	148	929	0_0_57_1_0_0_0_0_0_0_0	ERR449467
31955	05_200	Vietnam	2011	11231	937;48040	149	931	0_2_64_0_4_0_0_0_0_0_0	ERR449469
31956	05_227	Unknown		1920	69933	1051	932	0_0_50_0_0_0_0_0_0_1_0	ERR449470
31960	08_125	Unknown		1600	942;17038;48043;56430	151	936	0_2_48_3_1_0_0_0_0_2_0	ERR449474
31964	FC039	Unknown		11232	946;17039;48044	3	940	0_2_0_1_219_0_0_0_0_0_0	ERR449478
31966	02_225	The Gambia	1989	11233	69938	1052	942	29_0_0_0_0_0_0_0_0_0_0	ERR449480
31967	02_227	South Africa	1990	1902	992;17041;48047	42	943	0_0_8_0_1_0_0_0_0_0_0	ERR449481
31968	02_228	South Africa	1991	11234	69939;80143	1053	944	1_7_1_0_0_0_0_0_0_0_0	ERR449482
31969	02_229	South Africa	1991	10899	69940	1054	945	0_0_32_0_0_0_0_0_0_0_0	ERR449483
31970	02_230	Tanzania	1992	18329	996;17044;24996;48050;52113;54010;69941	441	946	34_0_0_1_0_0_0_0_0_0_0	ERR449484
31971	989000020	Cape Verde	1998	1583	998;17045;48051	475	947	0_2_14_0_0_0_0_0_0_0_0	ERR449485
31972	989000035	Cape Verde	1998	1931	112062	155	948	1_1_27_0_1_0_0_0_0_0_0	ERR449486
31973	989000005	The Gambia	1998	8139	954;17047;24050;48053;54011	156	949	0_12_5_0_0_0_0_0_1_0_0	ERR449487
31974	989000046	The Gambia	1998	8139	955;17048;24051;48054;54012	156	950	0_12_5_0_0_0_0_0_0_0_0	ERR449488
31975	989000266	The Gambia	1998	12080	999;17049;24052;48055;52114;54013	465	951	11_0_3_0_1_0_0_0_0_0_0	ERR449489
31976	989000418	Morocco	1998	1583	957;17050;48056;69943	90	952	0_2_7_2_0_0_0_0_0_0_0	ERR449490
31977	989000421	Morocco	1998	11235	958;17051;48057;54014	157	953	0_0_4_0_0_0_0_0_0_0_0	ERR449491
31978	989000016	Tanzania	1998	12082	1000;17052;48058;52115	476	954	1_4_0_0_0_0_0_0_0_0_0	ERR449492
31979	999000083	Uganda	1999	8142	112063	477	955	1_1_32_0_0_0_0_0_0_0_0	ERR449493
31980	999000018	Angola	1999	1585	112064	44	956	1_1_22_0_0_0_0_0_0_1_0	ERR449494
31982	999000051	Guinea	1999	12083	1002;17054;48061;69946	478	958	0_2_56_0_0_0_0_0_0_0_0	ERR449496
31983	999000073	Morocco	1999	7363	1003;17055;24053;48062;69947	479	959	5_1_0_0_0_0_0_0_0_0_0	ERR449497
31984	08_590_00123	Guinea-Bissau	2007	8112	69948;98357	243	960;38615	1_1_17_0_1_0_0_0_1_0_0	ERR449498
31985	08_590_125	Guinea-Bissau	2007	8112	69949;98358;101488	243	961;38616	1_1_17_0_2_0_0_0_0_0_0	ERR449499
31986	08_590_00126	Guinea-Bissau	2007	1603	967;17058;24056;48065	156	962	0_12_5_0_1_0_0_0_0_0_0	ERR449500
31988	08_590_00128	Guinea-Bissau	2007	11236	69951	1056	964	1_1_38_0_1_0_0_0_0_0_0	ERR449502
31989	08_590_00129	Guinea-Bissau	2007	8112	69952;98360	243	965;38618	1_1_17_0_1_0_0_0_0_0_0	ERR449503
31990	08_590_00130	Guinea-Bissau	2007	8112	69953;98361	243	966;38619	1_1_17_0_0_0_0_0_0_0_0	ERR449504
31991	08_590_00131	Guinea-Bissau	2007	8123	1005;17063;48070;54018;101489	327	967	15_0_0_0_0_0_0_0_0_0_0	ERR449505
31992	08_590_00132	Guinea-Bissau	2007	11236	69954	1056	968	1_1_38_0_0_1_0_0_0_0_0	ERR449506
31993	08_590_00133	Guinea-Bissau	2007	8112	69955;98362	243	969;38620	1_1_17_0_1_1_0_0_0_0_0	ERR449507
31994	08_590_00134	Guinea-Bissau	2007	11236	69956	1056	968	1_1_38_0_0_1_0_0_0_0_0	ERR449508
31995	08_590_00135	Guinea-Bissau	2007	11236	69957	1056	970	1_1_38_0_0_0_0_0_0_0_0	ERR449509
31996	08_590_00136	Guinea-Bissau	2007	11240	69958	1057	971	0_9_0_3_0_0_0_0_0_0_0	ERR449510
31997	08_590_00141	Guinea-Bissau	2007	11241	69959	1057	972	0_9_0_1_0_0_0_0_0_0_0	ERR449511
31998	08_590_00142	Guinea-Bissau	2007	8123	1011;17070;48077;54024	327	973	15_0_0_0_1_0_0_0_0_0_0	ERR449512
31999	08_590_00143	Guinea-Bissau	2007	8161	980;17071;48078;69960	166	974	1_1_36_0_0_0_0_0_0_0_0	ERR449513
32000	08_590_00144	Guinea-Bissau	2007	12084	1012;17072;48079;54025;69961	482	975	8_0_0_0_0_0_0_0_0_0_0	ERR449514
32001	08_590_00145	Guinea-Bissau	2007	1591	1013;17073;24061;48080;52116;54026;69962	485	976	11_0_1_1_0_0_0_0_0_0_0	ERR449515
32002	08_590_00146	Guinea-Bissau	2007	11242	69963	1057	977	0_9_0_2_0_0_0_0_0_0_0	ERR449516
32003	08_590_00147	Unknown		8161	984;17075;48082;69964	166	978	1_1_36_0_2_0_0_0_0_0_0	ERR449517
32004	08_590_00148	Unknown		11242	69965	1057	979	0_9_0_4_0_0_0_0_0_0_0	ERR449518
32005	08_590_00149	Unknown		8112	69966;98363	243	980;38621	1_1_17_0_1_3_0_0_0_0_0	ERR449519
32007	08_590_00153	Guinea-Bissau	2007	8161	988;17079;48086;69968	166	982	1_1_36_0_1_0_0_0_0_0_0	ERR449521
32008	08_590_00154	Guinea-Bissau	2007	8112	69969;98365	243	983;38623	1_1_17_0_1_2_0_0_0_0_0	ERR449522
32010	08_590_00157	Guinea-Bissau	2007	11244	112066	155	985	1_1_27_3_0_0_0_0_0_0_0	ERR449524
32011	08_590_00138_pg_r	Guinea-Bissau	2007	12084	1016;17083;48089;54029;69972	482	986	8_0_0_0_1_0_0_0_0_0_0	ERR449525
32012	08_590_00124	Unknown		11236	69973	1056	987	1_1_38_0_2_0_0_0_0_0_0	ERR449526
32013	08_590_00159	Unknown		11244	112067	155	988	1_1_27_3_0_0_0_0_0_0_0	ERR449527
32015	590_105	Unknown		12085	1019;17087;48092;52121;54031	484	990	36_0_0_0_0_0_0_0_0_0_0	ERR449529
32017	GC_10265	Unknown		7363	9751;17088;48093	327	992	15_0_0_1_0_0_0_0_0_0_0	ERR449532
32018	GC_10643	Unknown		1591	1020;17089;48094;52122;54032;69975	485	993	11_0_2_0_0_0_0_0_0_0_0	ERR449533
32019	GC_12463	Unknown		8392	1021;17090;24997;48095;52123;69976	486	994	37_0_0_1_0_0_0_0_0_0_0	ERR449535
32020	02_226	Unknown		11841	1022;17091;24998;69977	487	995	38_0_0_0_0_0_0_0_0_0_0	ERR449536
32021	989000246	Unknown		10899	1023;17092;53888	488	996	0_0_8_3_0_0_0_0_0_0_0	ERR449537
32023	JP_r_41	Unknown		7363	917	8	998	0_2_17_0_9_14_0_0_0_0_0	ERR449539
32026	K_GM	Unknown		7363	934	8	1001	0_2_17_0_0_19_0_1_0_0_0	ERR449542
32028	02_232	Unknown		1892	69978	1059	1003	1_8_9_0_0_0_0_0_0_0_0	ERR449544
32030	DO29810	Denmark	1963	7365	1026;17095;48098;53889;69979	490	1004	35_0_0_0_2_0_0_0_0_0_0	ERR449546
32031	DO29811	Unknown		10931	1029;17096;24066;48099;53890	491	1005	0_12_7_1_1_0_0_0_0_0_0	ERR449547
32032	DO32188	Unknown		1892	1030;17097;24067;41005;48100;69980	492	1006	1_8_7_0_0_0_0_0_0_0_0	ERR449548
32033	DO32189	Unknown		1892	1031;17098;24068;41006;48101;69981	492	1007	1_8_7_0_0_0_0_0_0_0_0	ERR449549
32036	DO32692	Unknown		1595	1032;17099;24069;52125;80144;119506	442	1009	42_0_0_0_0_0_0_0_0_0_0	ERR449552
32046	DO17769	Denmark	1965	11253	1033;17100;24070;24301;48102;52126;54033;69982	493	1010	49_1_0_0_0_0_0_0_0_0_0	ERR449564
32050	DO18273	Denmark	1940	11693	79904	1201	1011	47_0_1_0_0_0_0_0_0_0_0	ERR449569
32053	DO38932	Denmark	1941	11678	69984	1060	1012	1_8_1_0_1_0_0_0_0_0_0	ERR449573
32054	DO68169	Denmark	1967	1926	1036;17103;48105;53891;69985	410	1013	8_1_0_1_0_0_0_0_0_0_0	ERR449574
32055	DOP1	Unknown			1037;17104;41007;48106;52127;56443;69986	491	1014	0_12_7_1_0_0_0_0_0_0_0	ERR449575
32056	DO17717	Denmark	1968	10931	1038;17105;48107;69987	491	1015	0_12_7_0_1_0_0_0_0_0_0	ERR449576
32057	DO27234	Denmark	1968	10931	1040;17106;48108;52128;53838;54035;69988	491	1016	0_12_7_3_0_0_0_0_0_0_0	ERR449577
32058	DO44229	Denmark	1968	11258	941;17107;24071;41008;48109;53892;53954;56444;69989;88582	332	1017;29654	46_0_0_0_0_0_0_0_0_0_0	ERR449578
32061	DO303	Denmark	1979	1927	69990	409	1018	0_12_0_0_0_0_0_0_0_0_0	ERR449581
32062	DO313	Denmark	1979	1601	1042;17109;48111;54037	406	1019	0_0_0_3_0_0_0_0_0_0_0	ERR449582
32064	DO427	Denmark	1979	1595	1048;17110;24072;48112;52129;119507	442	1020	42_0_0_0_1_0_0_0_0_0_0	ERR449584
32065	DO438	Denmark	1979	1889	112068	497	1021	1_7_0_1_0_0_0_0_0_0_0	ERR449585
32067	DO445	Unknown		1595	1051;17112;24074;48114;52130	442	1020	42_0_0_0_1_0_0_0_0_0_0	ERR449587
32069	DO462	Denmark	1979	1595	1054;17113;24075;48115;52131;119508	442	1020	42_0_0_0_1_0_0_0_0_0_0	ERR449589
32071	DO45045	Denmark	1943	11253	1058;17114;24302;48116;52132;54038;69992	493	1023	49_1_0_0_0_2_0_0_0_1_0	ERR449591
32072	DO45046	Denmark	1943	11253	1059;17115;25316;48117;54039;69993	493	1024	49_1_0_0_0_2_0_0_0_0_0	ERR449592
32073	989000348	Unknown		11264	1027;48118;52133;54040;56445	183	1025	0_5_0_0_0_0_0_0_0_0_0	ERR485165
32074	989000093	Saudi Arabia	1998	7363	1028;17116;48119;53893;56446	184	1026	0_12_4_0_0_0_0_0_0_0_0	ERR485166
32076	02_231	UK	2002	1892	69994	1059	1003	1_8_9_0_0_0_0_0_0_0_0	ERR485168
32081	DO17810	Denmark	1940	11253	1064;17119;24303;48122;54041;69995	493	1031	49_1_0_0_0_0_0_0_0_1_0	ERR449565
34770	ATL_2011_01_03	USA	2011	10931	1070;17121;24077;56448	422	1034	0_12_9_3_4_0_0_0_0_0_0	SRR969360
34774	ATL_2011_01-21	USA	2011	1902	1077;17125;24304	42	1038	0_0_8_0_0_0_0_0_0_0_0	SRR969364
34776	ATL_2011_05-08	USA	2011	1585	112071	44	1040	1_1_22_0_0_0_0_0_0_0_0	SRR969366
34779	MIA_2011_03-09	USA	2011	1931	112072	41	1043	1_1_2_25_0_0_0_0_0_0_0	SRR969369
34784	NOR_2011_03-06	USA	2011	1583	1050;17131;54042;70001	132	1047	0_2_38_0_0_0_0_0_0_0_0	SRR969374
34785	NYC_2011_05_07	USA	2011	1901	975	3	1048	0_2_0_1_109_1_0_0_0_0_0	SRR969375
34788	MU_NG4	Japan	1996	1590	1081;17133;24079;56451	435	1051	0_12_2_0_5_0_0_0_0_1_0	SRR969379
34789	MU_NG5	Philippines	1992	1901	977	3	1052	0_2_0_1_44_2_0_0_0_0_0	SRR969380
34790	MU_NG6	Australia	2001	10934	1090;17134;24305;52135;54043;80145;88583	441	1053;29655	34_0_0_0_0_0_0_0_0_0_0	SRR969381
34797	MU_NG18	Norway	2010	10933	112074	187	1059	0_13_0_0_0_0_0_0_0_0_0	SRR969388
34800	MU_NG21	Pakistan	2008	1902	1095;17139	42	1061	0_0_8_1_7_0_0_0_0_0_0	SRR969391
36240	52262	Kenya	2012	1903	70008	37	1068	0_0_47_5_13_0_0_0_0_0_0	ERR976904
36243	57547	Kenya	2012	1893	112078	498	1071	0_16_0_1_5_0_0_0_0_0_0	ERR976948
36247	62017	Kenya	2013	11366	1113;17150;49847;56456;70011	501	1075	0_16_4_0_1_3_0_0_1_0_0	ERR976908
36250	58767	Kenya	2012	11365	1116;17153;56457;70012;101491	21	1078	0_0_33_46_9_0_0_0_0_0_0	ERR976911
36251	63179	Kenya	2013	11367	1118;17154;54044	502	1079	0_2_55_0_0_0_0_0_0_0_0	ERR976912
36253	61450	Kenya	2013	11364	112082	498	1081	0_16_0_1_9_0_0_0_0_0_0	ERR976951
36255	45453	Kenya	2010	1893	112083	498	1083	0_16_0_2_2_1_0_0_0_1_0	ERR976915
36257	51960	Kenya	2012	1591	1125;17160;24083;49848;54045;70016	485	1085	11_0_2_2_0_0_0_0_0_0_0	ERR976917
36259	61580	Kenya	2013	1893	112086	498	1087	0_16_0_1_0_3_0_0_0_0_0	ERR976956
36266	60096	Kenya	2012	11369	1139;17167	498	1092	0_16_0_3_0_0_0_0_0_0_0	ERR976921
36268	T060	Kenya	2013	1599	1144;17169;24306;25323;54046	499	1094	0_18_6_0_0_0_0_0_0_1_0	ERR976935
36269	52263	Kenya	2012	11370	112089	498	1095	0_16_0_6_0_0_0_0_0_0_0	ERR976962
36270	59688	Kenya	2012	8133	70018	503	1096	0_0_36_0_1_0_0_0_0_0_0	ERR976923
36271	50659	Kenya	2011	6957	1182;17172;53894;53955	504	1097	0_16_1_2_0_0_0_0_0_0_0	ERR976924
36274	63518	Kenya	2013	11366	1198;17175;49849;52136;56461;70019	501	1100	0_16_4_0_5_0_0_0_0_0_0	ERR976926
36277	59012	Kenya	2012	11366	1213;17178;49850;56462;70021	501	1103	0_16_4_0_1_3_0_0_0_0_0	ERR976928
36281	47686	Kenya	2011	1893	112093	498	1107	0_16_0_1_4_0_0_0_1_0_0	ERR976931
36283	47147	Kenya	2011	1893	112094	498	1109	0_16_0_2_2_1_0_0_0_3_0	ERR976933
36285	43346	Kenya	2010	1903	70024	37	1111	0_0_47_5_11_1_0_0_0_0_0	ERR976964
36291	60755	Kenya	2013	1588	1239;17190;56463;70029;101493	21	1116;9806	0_0_33_45_0_0_0_0_0_0_0	ERR976939
36294	43038	Kenya	2010	1903	70032	37	1119	0_0_47_9_0_0_0_0_1_0_0	ERR976941
36299	46445	Kenya	2011	1893	112096	498	1124	0_16_0_1_0_1_0_0_0_0_0	ERR976943
36675	P9-17	UK	1973	1926	1294;17208;48126;53896;70040	407	1138	8_1_0_2_0_0_0_0_0_0_0	ERR977394
37029	GCGS1029	USA	2007	11411	1305;17215;45048;48130;56467	435	1154	0_12_2_1_0_0_0_0_0_0_0	ERR854889
37031	GCGS1035	USA	2007	1901	1155;17217	18	1156	0_0_12_2_3_0_1_0_0_0_0	ERR854891
37032	GCGS1024	USA	2007	1901	1156	18	1157	0_0_12_2_3_0_14_0_0_1_0	ERR854892
37033	GCGS1061	USA	2007	1901	1157;17218;48131	18	1158	0_0_12_2_3_0_10_0_0_0_0	ERR854893
37039	GCGS0927	USA	2012	1901	1087	3	1164	0_2_0_1_0_0_6_0_0_0_0	ERR854899
37040	GCGS0881	USA	2012	1901	1088;17220	3	1165	0_2_0_1_0_0_0_0_15_0_0	ERR854900
37049	GCGS0244	USA	2006	1590	70045	505	1174	10_0_0_0_6_0_0_0_0_0_0	ERR854909
37052	GCGS0960	USA	2012	1901	1108;17224	3	1177	0_2_0_1_16_0_0_0_1_3_0	ERR854912
37055	GCGS0932	USA	2012	1901	1111	3	1180	0_2_0_1_0_2_2_0_0_1_0	ERR854915
37056	GCGS0905	USA	2012	1901	1117;17225	3	1181;1604	0_2_0_1_35_2_0_0_0_0_0	ERR854916
37078	GCGS0878	USA	2012	1901	1161	3	1202;48014	0_2_0_1_0_110_0_0_0_0_0	ERR854937
37082	GCGS0996	USA	2012	1901	1165	3	1206	0_2_0_1_0_4_8_1_0_2_0	ERR854939
37086	GCGS1011	USA	2012	1901	1170;48140;70046	3	1210	0_2_0_1_0_131_1_0_0_0_0	ERR854942
37091	GCGS0868	USA	2013	1901	1176;17230	3	1215	0_2_0_1_0_33_0_1_0_1_0	ERR854947
37093	GCGS0313	USA	2012	1585	112098	44	1217	1_1_22_0_15_0_0_0_0_0_0	ERR854949
37095	GCGS0551	USA	2012	8153	70048	3	1219	0_2_0_2_0_0_0_0_0_0_0	ERR854951
37102	GCGS0348	USA	2012	12086	1312;17236;24089;48145	414	1226	1_8_5_0_43_0_0_0_0_0_0	ERR854958
37103	GCGS0349	USA	2012	1893	70052	31	1227	0_2_29_12_5_1_0_0_0_0_0	ERR854959
37105	GCGS0350	USA	2012	10931	1315;17239;48148;52138;56468;111994	422	1229;47985	0_12_9_3_1_2_0_0_0_0_0	ERR854961
37107	GCGS0376	USA	2012	10932	1321;17240;56469	304	1231	0_0_1_0_22_0_0_0_0_0_0	ERR854963
37108	GCGS0377	USA	2012	12007	1322;17241;70054	446	1232	19_0_1_0_4_0_0_0_0_0_0	ERR854964
37112	GCGS0396	USA	2012	1588	1324;17243;56470	21	1236	0_0_33_12_73_0_0_0_0_0_0	ERR854968
37115	GCGS0399	USA	2012	7363	1333;17246;48150;80147	196	1239	0_0_52_1_11_2_0_0_1_0_0	ERR854871
37116	GCGS0758	USA	2012	7363	1336;17247;80148	196	1240	0_0_52_1_1_19_0_2_0_2_0	ERR854971
37117	GCGS0542	USA	2005	1579	70056	24	1241	0_0_43_1_0_31_0_0_0_0_0	ERR854972
37118	GCGS0381	USA	2005	7371	1187;48151	3	1242	0_2_0_1_151_0_0_0_0_1_0	ERR854973
37119	GCGS0633	USA	2005	1901	1188	3	1243	0_2_0_1_157_0_0_1_0_0_0	ERR854974
37122	GCGS0292	USA	2006	10935	70058	1036	1246	1_1_4_1_0_0_0_0_0_0_0	ERR854977
37123	GCGS1058	USA	2007	1901	1189;48154;70059	3	1247	0_2_0_1_109_4_0_0_0_0_0	ERR854978
37125	GCGS1076	USA	2007	11413	70060	198	1249	1_1_26_0_0_0_0_0_0_0_0	ERR854980
37132	GCGS0549	USA	2011	1901	1193	3	1256	0_2_0_1_214_0_0_1_0_0_0	ERR854987
37133	GCGS0319	USA	2011	1901	1256;17256;48158	3	1257	0_2_0_1_114_0_0_0_0_0_0	ERR854988
37139	GCGS0731	USA	2011	1901	1196;17260	3	1263	0_2_0_1_162_2_0_0_0_0_0	ERR854994
37142	GCGS0353	USA	2011	8149	1426;17263;48160;52139;70062;109229	506	1266	5_2_0_4_5_0_0_0_0_0_0	ERR854997
37144	11CFX_C_016	USA		1903	70064;80149	37	1268	0_0_47_5_0_2_0_0_0_0_0	ERR854999
37149	GCGS0755	USA	2011	7363	1457;17269;80150	196	1273	0_0_52_1_1_19_0_1_1_0_0	ERR855004
37151	GCGS0757	USA	2011	1901	9811;17271;25331	3	1275	0_2_0_1_0_126_0_0_0_0_0	ERR855006
37155	GCGS0450	USA	2011	1585	112100	44	1279	1_1_22_3_2_0_0_0_0_0_0	ERR855010
37158	GCGS0312	USA	2011	1584	112101	41	1282	1_1_2_0_14_0_0_0_0_0_0	ERR855013
37160	GCGS0559	USA	2011	1901	1283;48164;70067	18	1284	0_0_12_2_3_0_19_0_0_0_0	ERR855015
37161	GCGS0370	USA	2011	1582	70068	1063	1285	0_0_41_1_1_0_0_0_0_0_0	ERR855016
37163	GCGS0592	USA	2011	1901	1206;17279;70070	3	1287	0_2_0_1_119_0_0_0_2_0_0	ERR855018
37166	GCGS0767	USA	2011	1901	1207;17282	3	1290	0_2_0_1_27_30_0_0_4_0_0	ERR855021
37171	GCGS0449	USA	2011	11414	1524;17286;24093;25332;70073	507	1295	22_0_0_4_0_0_0_0_0_0_0	ERR855026
37172	GCGS0452	USA	2011	1901	1211;17287;48168	3	1296	0_2_0_1_124_0_0_0_2_0_0	ERR855027
37173	GCGS0465	USA	2011	1590	70074	505	1297	10_0_0_0_11_0_0_0_0_0_0	ERR855028
37179	GCGS0794	USA	2011	1920	70076	24	1303	0_0_43_6_0_0_0_0_0_0_0	ERR855034
37181	GCGS0806	USA	2011	1901	1304;17296	18	1305	0_0_12_2_3_14_1_0_1_0_0	ERR855036
37182	GCGS0808	USA	2011	7363	1532;17297;80154	196	1306	0_0_52_1_1_19_0_2_0_1_0	ERR855037
37183	GCGS0809	USA	2011	7363	1559;17298;80155	196	1307	0_0_52_1_1_19_0_2_0_5_0	ERR855038
37187	GCGS0429	USA	2012	10932	1572;17301;56487	304	1311	0_0_1_0_24_0_0_0_0_0_0	ERR855042
37188	GCGS0769	USA	2012	12090	70079	509	1312	0_0_43_12_9_0_0_0_0_0_0	ERR855043
37189	GCGS0430	USA	2012	1902	1581;17303;48174	42	1313	0_0_8_1_8_0_0_0_0_0_0	ERR855044
37190	GCGS0431	USA	2012	10316	1586;17304;24095;25336;48175;70080	507	1314	22_0_0_2_0_0_0_0_0_0_0	ERR855045
37191	GCGS0453	USA	2012	6962	70081	1026	1315	2_0_2_0_3_0_0_0_0_0_0	ERR855046
37192	GCGS0454	USA	2012	8149	1607;17306;48177;52142;70082;109230	506	1316	5_2_0_4_2_0_0_0_0_0_0	ERR855047
37195	GCGS0456	USA	2012	10317	112103	41	1319	1_1_2_9_0_1_0_0_0_0_0	ERR855050
37197	GCGS0471	USA	2012	11415	9821;17311;48181;52143;70085	204	1321	1_1_24_0_0_0_0_0_0_0_0	ERR855052
37199	GCGS0472	USA	2012	1893	70087	31	1323	0_2_29_12_0_2_0_0_0_0_0	ERR855054
37200	GCGS0479	USA	2012	10931	1660;17314;24096;54050	422	1324	0_12_9_3_1_3_0_0_0_0_0	ERR855055
37202	GCGS0489	USA	2012	1585	112104	44	1326	1_1_22_3_0_0_0_0_0_0_0	ERR855057
37203	GCGS0678	USA	2012	11184	1217;17317	335	1327	0_2_12_0_0_0_0_0_0_0_0	ERR855058
37204	GCGS0495	USA	2012	1588	1662;17318;52144;56489	21	1328	0_0_33_12_69_0_0_0_0_0_0	ERR855059
37205	GCGS0496	USA	2012	7828	1665;17319;48184;52145;109231	510	1329	0_1_0_0_1_0_0_0_0_0_0	ERR855060
37212	GCGS0311	USA	2005	1584	112105	41	1336	1_1_2_0_8_1_0_0_0_0_0	ERR855067
37213	GCGS0257	USA	2005	8149	1668;17324;48189;52147;70094;109232	506	1337	5_2_0_4_3_0_0_0_0_0_0	ERR855068
37223	GCGS0271	USA	2005	1580	1343	16	1345	0_2_1_0_33_1_0_0_0_0_0	ERR855076
37227	GCGS0380	USA	2005	1580	1346	16	1348	0_2_1_0_33_0_1_0_0_1_0	ERR855080
37233	GCGS0289	USA	2005	1580	1352;17334;48195	16	1354	0_2_1_0_33_0_0_1_0_2_0	ERR854877
37234	GCGS0653	USA	2005	1901	1230;48196;105053	3	1355;44422	0_2_0_1_129_4_0_0_0_0_0	ERR855083
37235	GCGS0296	USA	2005	7367	70099;111995	95	1356	0_2_4_1_3_0_0_0_0_0_0	ERR855084
37237	GCGS0298	USA	2005	7367	70101;111997	95	1358	0_2_4_1_3_0_0_0_0_2_0	ERR855086
37241	GCGS0713	USA	2005	1579	1360;17340;25339	24	1362	0_0_43_1_0_16_0_0_0_0_0	ERR855090
37243	GCGS0586	USA	2006	1587	1233;56491	208	1364	0_2_36_3_2_0_0_0_0_0_0	ERR855092
37244	GCGS0591	USA	2010	1901	1241;17341	3	1365	0_2_0_1_119_0_0_0_1_3_2	ERR855093
37256	GCGS1030	USA	2007	1580	1375;17348;41012	16	1377	0_2_1_0_44_1_0_0_0_0_0	ERR855104
37257	GCGS1031	USA	2007	1580	1376;17349;41013	16	1378;1379	0_2_1_0_44_0_0_0_0_0_0	ERR855105
37258	GCGS1032	USA	2007	1580	1377;17350;41014	16	1379	0_2_1_0_44_0_0_0_0_0_0	ERR855106
37259	GCGS1033	USA	2007	1580	1378;17351;41015	16	1380	0_2_1_0_44_1_0_0_1_0_0	ERR855107
37262	GCGS1043	USA	2007	1579	1380;17353;25340	24	1382	0_0_43_1_0_38_0_0_0_1_0	ERR855110
37274	GCGS1082	USA	2007	1580	1392;17359	16	1394	0_2_1_0_34_0_0_0_0_0_0	ERR855122
37309	GCGS0828	USA	2005	1920	70110	24	1428	0_0_43_5_0_0_0_0_0_0_0	ERR855154
37311	GCGS0568	USA	2005	1901	1428;17377	3	1430	0_2_0_1_134_4_0_0_0_0_0	ERR855156
37313	GCGS0250	USA	2005	8114	70113	44	1432	1_1_22_9_0_5_0_0_0_0_0	ERR855158
37316	GCGS0601	USA	2005	1580	1432;17380	16	1435	0_2_1_0_40_0_0_0_0_0_0	ERR855161
37319	GCGS0419	USA	2005	1579	1349	3	1438	0_2_0_1_179_0_0_1_0_0_0	ERR855164
37325	GCGS0785	USA	2005	1901	1368	3	1444	0_2_0_1_131_0_0_0_0_0_0	ERR855170
37327	GCGS0445	USA	2005	1590	70117	1065	1446	10_0_1_0_0_0_0_0_0_0_0	ERR855172
37331	GCGS0801	USA	2005	1901	1447	18	1450	0_0_12_2_3_0_5_0_0_0_0	ERR855176
37343	GCGS0778	USA	2006	1901	1459;17392	18	1462	0_0_12_2_3_0_5_1_0_0_0	ERR855188
37346	GCGS0674	USA	2006	1901	1462;17393;48220	18	1465	0_0_12_2_3_0_0_0_11_0_0	ERR855191
37348	GCGS0511	USA	2006	1901	1464;17394;48221	3	1467	0_2_0_1_216_0_0_0_0_0_0	ERR855193
37353	GCGS1028	USA	2007	1595	1700;17397;24097;52151;80158;119509	442	1472	42_0_0_0_4_0_0_0_0_0_0	ERR855198
37356	07AZI_C_008	USA		11417	1701;17400;48224;56494	304	1475	0_0_1_0_8_0_0_0_0_0_0	ERR855201
37357	GCGS1046	USA	2007	1932	9828;17401;48225	336	1476	0_8_2_0_0_0_0_0_0_0_0	ERR855202
37363	GCGS1067	USA	2007	1901	1478;17405	18	1482	0_0_12_2_3_36_1_0_0_0_0	ERR855208
37364	GCGS1070	USA	2007	1901	1398	3	1483	0_2_0_1_109_0_3_0_0_0_0	ERR855209
37372	GCGS1088	USA	2007	1901	1409	3	1491	0_2_0_1_157_0_0_0_0_1_0	ERR855217
37383	GCGS1093	USA	2009	1901	1498	18	1501	0_0_12_2_3_0_13_1_1_0_0	ERR855228
37385	GCGS0222	USA	2009	1901	1704;17412	3	1503	0_2_0_10_0_0_0_0_0_1_0	ERR855230
37388	GCGS0851	USA	2009	1901	1422	3	1506	0_2_0_1_0_0_20_0_0_0_0	ERR855233
37390	GCGS0154	USA	2009	8130	9830;17413	25	1508	0_0_26_12_0_0_0_0_0_0_0	ERR855235
37391	GCGS0148	USA	2009	1901	1506;17414	3	180;280	0_2_0_1_145_0_0_0_0_0_0	ERR855236
37396	GCGS0345	USA	2010	11418	112110	41	1513	1_1_2_2_0_0_0_0_0_0_0	ERR855241
37398	GCGS0743	USA	2010	1893	70125	31	1515	0_2_29_7_1_0_0_1_0_0_0	ERR855243
37405	GCGS0515	USA	2011	11419	1707;17422;24099;48238;109233	416	1522	0_0_18_9_0_0_0_0_0_0_0	ERR855250
37407	GCGS0517	USA	2011	1582	1522;17424;48239;52154;53840;70128	32	1524	0_0_41_2_1_0_0_0_0_0_0	ERR855252
37408	GCGS0717	USA	2011	1901	1523;48240	18	1525	0_0_12_2_24_0_0_0_0_1_0	ERR855253
37410	GCGS0818	USA	2011		1710;17426;80161	196	1527	0_0_52_1_1_36_0_0_0_0_0	ERR855255
37413	GCGS0714	USA	2011	7828	70129	1066	1530	0_0_52_0_1_0_0_0_0_0_0	ERR855258
37423	GCGS1013	USA	2011		70131	31	1540	0_2_29_3_0_0_0_0_0_0_0	ERR855268
37426	GCGS0969	USA	2011	1901	1461	3	1543	0_2_0_1_0_55_4_0_0_0_0	ERR855271
37427	GCGS0993	USA	2011	1901	1468	3	1544	0_2_0_1_33_0_0_1_0_0_0	ERR855272
37431	GCGS0956	USA	2011	1901	1476	3	1547;1548;1552;6796	0_2_0_1_16_0_0_0_1_1_0	ERR855276
37432	GCGS0967	USA	2011	9365	1479	3	1549	0_2_0_1_55_0_0_0_7_0_0	ERR855277
37437	GCGS0893	USA	2011	1901	1486	3	1554	0_2_0_1_0_0_0_0_13_0_0	ERR855282
37444	GCGS0848	USA	2010	1901	1497	3	1561	0_2_0_1_0_108_0_0_2_0_0	ERR855289
37445	GCGS0706	USA	2010	1901	1500;17437	3	1562	0_2_0_1_119_0_0_0_1_4_0	ERR855290
37448	GCGS0655	USA	2010	1893	70132	31	1565	0_2_29_5_0_0_0_0_0_0_0	ERR855293
37453	GCGS0486	USA	2010	1920	70133	24	1570	0_0_43_6_0_1_0_0_0_0_0	ERR855298
37458	GCGS0858	USA	2011	1901	1516;17447;70134	3	1575	0_2_0_1_119_0_0_1_0_0_0	ERR855303
37464	GCGS0821	USA	2011	1580	1579;17450	16	1581	0_2_1_0_37_0_0_0_1_0_0	ERR855309
37470	GCGS0676	USA	2011	1901	1585;17454;70136	3	1587	0_2_0_1_119_0_0_2_0_0_0	ERR855315
37471	GCGS0614	USA	2012	12093	70137	24	1588	0_0_43_7_0_0_0_0_0_0_0	ERR855316
37477	GCGS0822	USA	2012	1901	1540;48254	3	1594	0_2_0_1_0_0_15_2_3_0_0	ERR855322
37480	12AZI_C_010	USA		1901	1543	3	1596	0_2_0_1_0_0_0_17_1_0_0	ERR855325
37485	GCGS0659	USA	2012	1901	1547;48256	3	1601	0_2_0_1_124_2_0_0_0_0_0	ERR855330
37487	GCGS0770	USA	2013	7363	1724;17459;80166	196	1603	0_0_52_1_1_22_0_1_0_0_0	ERR855332
37490	GCGS0426	USA	2013	11420	1551	16	1605	0_2_1_0_73_51_3_0_0_1_0	ERR855335
37492	GCGS0474	USA	2013	8149	1726;17462;48258;52156;70138	513	1607	5_2_1_0_0_0_0_0_0_0_0	ERR855337
37497	GCGS0850	USA	2013	1584	112111	41	1612	1_1_2_0_18_0_0_0_0_0_0	ERR855342
37508	GCGS0849	USA	2012	7360	1565	3	1622	0_2_0_1_14_4_0_0_1_0_0	ERR855353
37516	12AZI_T_011	USA		1579	1308;17299;17470;25334;25356	24	1309	0_0_43_1_0_18_0_0_0_3_0	ERR855361
37523	GCGS0587	USA	2013	11422	1582;17475	16	1636	0_2_1_0_73_62_0_0_0_0_1	ERR855368
37524	GCGS0611	USA	2013	9363	1583;17476	16	1637	0_2_1_0_73_57_0_0_0_1_0	ERR855369
37531	GCGS0404	USA	2013	9363	1592;17480	16	1644	0_2_1_0_73_57_0_0_0_2_0	ERR855376
37545	GCGS0497	USA	2013	9363	1601;17489	16	1658	0_2_1_0_73_56_0_0_0_0_0	ERR855390
37554	GCGS1008	USA	2013	1901	1609	3	1667;1669;9647	0_2_0_1_0_0_32_0_0_3_0	ERR855399
37557	GCGS0947	USA	2011	1901	1615	3	1670	0_2_0_1_16_0_0_0_0_1_0	ERR855402
37564	GCGS1000	USA	2011	1901	1623	3	1676	0_2_0_1_0_55_1_0_0_0_0	ERR855409
37572	GCGS0968	USA	2011	1901	1634;17499	3	1684	0_2_0_1_27_30_0_0_0_0_0	ERR855417
37573	GCGS0937	USA	2011		1635	3	1685	0_2_0_1_0_2_0_1_0_0_0	ERR855418
37574	GCGS0898	USA	2011	10312	1637	3	1686	0_2_0_1_0_28_0_0_0_2_0	ERR855419
37580	GCGS0945	USA	2011	1901	1645	3	1692	0_2_0_1_0_4_0_0_2_4_0	ERR855425
37582	GCGS1017	USA	2011	1920	70148	24	1694	0_0_43_6_1_0_0_0_0_0_0	ERR855427
37583	GCGS0895	USA	2011	10312	1643;17501	3	133;201;1691;6788	0_2_0_1_0_28_0_0_0_1_0	ERR855428
38982	LNP16626	France		1590	70149	505	1702	10_0_0_0_0_0_0_0_0_0_0
39081	64204	Kenya	2014	11366	1736;1744;17504;17512;49852;49856;52158;52160;56502;56504;70150;70157	501	1703	0_16_4_0_3_0_0_0_0_0_0	ERR1143657
39082	64500	Kenya	2014	12240	70151	37	1704	0_0_47_5_6_0_1_0_0_0_0	ERR1143658
39083	64579	Kenya	2014	11366	70152	501	1705	0_16_4_0_1_2_0_0_0_0_0	ERR1143659
39086	64586	Kenya	2014	11366	1741;17509;49854;52159;54053;70154	501	1708	0_16_4_0_8_0_0_0_0_0_0	ERR1143662
39088	64755	Kenya	2014	11366	1743;17511;49855;56503;70156	501	1710	0_16_4_0_1_0_0_0_0_0_0	ERR1143664
39089	64203	Kenya	2014	11366	1744;17512;49856;52160;56504;70157	501	1703	0_16_4_0_3_0_0_0_0_0_0	ERR1143665
39092	65320	Kenya	2014	11366	1748;17515;49857;52161;56505;70159	501	1712	0_16_4_0_6_0_0_0_0_0_0	ERR1143668
39093	65551	Kenya	2014	12241	70160	37	1713	0_0_47_5_12_0_0_0_0_0_0	ERR1143669
39094	65600	Kenya	2014	11750	112115	213	1714	1_1_34_0_0_0_0_0_0_0_0	ERR1143670
39095	65737	Kenya	2014	11366	1750;17518;49858;52162;70161	501	1715	0_16_4_0_2_0_0_0_0_0_0	ERR1143671
39098	56682	Kenya	2012	1931	70164	1067	1718	1_1_29_0_1_0_0_0_0_0_0	ERR1143674
39104	45722	Kenya	2010	1599	1757;17525;25367;54054	499	1722	0_18_6_1_0_0_0_0_0_0_0	ERR1143684
39105	44941	Kenya	2010	1599	1758;17526;25368;54055	499	1723	0_18_6_1_1_0_0_0_0_0_0	ERR1143691
39106	45388	Kenya	2010	12242	1760;17527;52164;53841;54056;70166	504	1724	0_16_1_0_0_0_0_0_0_0_0	ERR1143693
39107	45715	Kenya	2010	1893	112118	498	1725	0_16_0_1_0_2_0_0_0_0_0	ERR1143695
39109	43208 -1	Kenya	2010	1903	70167	37	1073;1113;1123;1727	0_0_47_9_0_1_0_0_0_0_0	ERR1143704
39114	44254	Kenya	2010	1903	70171	37	1730	0_0_47_5_7_0_0_0_0_1_0	ERR1143678
39115	43306	Kenya	2010	12241	70172	37	1731	0_0_47_5_10_0_0_0_0_0_0	ERR1143679
39117	47244	Kenya	2011	1893	112122	498	1109;1733	0_16_0_2_2_1_0_0_0_3_0	ERR1143683
39118	47954	Kenya	2011	1599	1773;17539;25375;54057	499	1088;1090	0_18_6_1_0_0_0_0_0_1_0	ERR1143685
39119	47547	Kenya	2011	1583	70173	1068	1734	0_2_42_0_0_0_0_0_0_0_0	ERR1143686
39120	47548	Kenya	2011	1893	112123	498	1735	0_16_0_2_3_0_0_0_0_0_0	ERR1143687
39121	48183	Kenya	2011	12243	1780;17542;52165;53842;54058	504	1736	0_16_1_1_0_0_0_0_0_0_0	ERR1143688
39123	48437	Kenya	2011	1931	70175	1067	1738	1_1_29_0_0_0_0_0_0_0_0	ERR1143690
39124	48563	Kenya	2011	1599	1782;17544;25377;54059	499	1088;1090	0_18_6_1_0_0_0_0_0_1_0	ERR1143692
39125	48848	Kenya	2011	1599	1783;17545;25378;56507	499	1739	0_18_6_1_0_0_0_0_0_2_0	ERR1143694
39127	48502	Kenya	2011	1599	1786;17547;25379;54060	499	1088;1090	0_18_6_1_0_0_0_0_0_1_0	ERR1143697
39128	48406	Kenya	2011	1599	1069;17142;17548;17549;24082;53898;56453;70007;70176	188	1067;1740	1_1_11_1_0_0_0_0_0_0_0	ERR1143698
39129	50040	Kenya	2011	1599	1069;17142;17548;17549;24082;53898;56453;70007;70176	188	1067;1740	1_1_11_1_0_0_0_0_0_0_0	ERR1143699
39131	49676	Kenya	2011	1599	1747;17551;25380;53899;70177	188	1742	1_1_11_1_0_0_0_0_0_1_0	ERR1143701
39133	50869	Kenya	2011	8120	9866;17553;25381;70178	338	1744	1_1_12_0_0_0_0_0_0_0_0	ERR1143705
39135	52057	Kenya	2012	11370	112128	498	1095;1746	0_16_0_6_0_0_0_0_0_0_0	ERR1143708
39137	65907	Kenya	2015	1599	70179	1069	1747	16_0_0_0_0_0_0_0_0_0_0	ERR1143710
39138	66098	Kenya	2015	11366	1845;17557;49859;56508;70180;105056	501	1748	0_16_4_0_9_0_0_0_0_0_0	ERR1143711
39139	42978	Kenya	2010	1893	112129	498	1749	0_16_0_2_2_0_0_0_0_0_0	ERR1143712
41200	12U020152	UK [England]	2012	1584	112130	41	1754	1_1_2_0_26_2_0_0_0_0_0
41202	12U175743	UK [England]	2012	7363	70184	196	1756	0_0_52_1_1_0_0_0_8_1_0
41209	13U152480	UK [England]	2013	7363	70186	196	1762	0_0_52_1_3_1_0_0_0_1_0
42377	1459000321	Sweden	2014	7823	70194	133	1789	0_2_9_5_0_0_0_0_0_0_0
42793	345437	UK [Scotland]	2006	1580	1800;17592;24113	16	1794	0_2_1_0_5_0_0_0_0_0_0	ERR2172261
42802	H090660006	UK [England]	2009	1901	84476	18	1803	0_0_12_2_3_21_0_0_0_0_0
42809	H151040342	UK [England]	2015	1580	1816;17607;24117;36052	16	1810	0_2_1_0_1_23_1_0_0_12_0	ERR2172287
42815	H152560546	UK [England]	2015	1580	1821;17612;25399;36056	16	1815	0_2_1_0_1_26_0_0_0_0_0	ERR2172334
42831	H155100304	UK [England]	2015	1580	1837;17628;25409;36069	16	1831	0_2_1_0_1_23_1_3_0_0_0	ERR2172303
42843	RB14001817	UK [England]	2014	1901	1849;17640;48278	18	1843	0_0_12_2_26_4_0_0_0_0_0
45011	EXNG202	Australia	2011	12045	70197	1071	1849	0_2_45_2_0_3_0_0_0_0_0
45012	EXNG204	Australia	2011	7363	1912;17644;48280;53900;53962;70198	521	1850	0_2_44_3_2_0_0_0_0_0_0
45015	EXNG206	Australia	2011	7363	1913;17645;48281;53901;53963;70199	521	1851	0_2_44_3_2_0_1_0_0_0_0
45016	EXNG209	Australia	2011	12042	1916;17646;38533;48282;52170;56516	522	1852	0_16_6_0_0_0_1_0_0_1_0
45017	EXNG210	Australia	2011	12040	70200	523	1853	0_2_44_1_2_0_0_0_0_1_0
45018	EXNG213	Australia	2011	12040	70201;80169	523	1854	0_2_44_1_2_0_0_0_0_0_0
45019	EXNG219	Australia	2011	7363	1923;17649;48285;53903;53964;70202	521	1855	0_2_44_3_2_0_0_0_0_0_0
45020	EXNG214	Australia	2011	12045	70203	1071	1856	0_2_45_2_0_0_0_0_0_1_0
45021	EXNG225	Australia	2011	12045	70204	1071	1857	0_2_45_2_5_0_0_0_0_0_0
45022	EXNG226	Australia	2011	8145	1884;17652;48288;70205	234	1858	0_2_60_0_3_0_0_0_0_0_0
45027	EXNG239	Australia	2012	7363	1932;17653;25417;48289;53904;53965;70206	521	1859	0_2_44_4_0_0_0_0_0_0_0
45029	EXNG229	Australia	2011	12045	70207	1071	1860	0_2_45_2_4_0_0_0_0_0_0
45030	EXNG230	Australia	2011	12042	1937;17655;38534;48291;52171;54061	522	1861	0_16_6_0_0_0_1_0_1_0_0
45031	EXNG232	Australia	2011	1901	1888;48292	18	1862	0_0_12_2_3_22_0_0_0_0_0
45032	EXNG301	Australia	2013	12041	1941;17656;48293;52172;70208	524	1863	5_2_3_1_0_0_0_0_0_0_0
45033	EXNG305	Australia	2013	12046	70209	1071	1864	0_2_45_0_0_0_0_1_0_0_0
45036	EXNG252	Australia	2012	12045	70211	1071	1867	0_2_45_2_0_1_0_0_0_0_0
45039	EXNG257	Australia	2012	7822	1725;17661;48298;70213	133	1870	0_2_9_14_49_1_0_0_0_0_0
45040	EXNG270	Australia	2013	7822	1729;17662	133	1871	0_2_9_14_17_1_0_0_0_0_0
45043	EXNG287	Australia	2013	11249	6798;17665;48300;52174;80170	236	1874	0_18_1_2_2_0_0_0_0_0_0
45044	EXNG304	Australia	2013	1901	1733;17666	3	1875	0_2_0_1_27_22_0_0_0_0_0
45045	EXNG288	Australia	2013	12042	1955;17667;38535;48301;52175;54062	522	1876	0_16_6_0_0_0_1_1_0_0_0
45046	EXNG217	Australia	2011	12045	70214	1071	1877	0_2_45_2_0_0_0_0_0_0_0
45047	EXNG218	Australia	2011	7363	1961;17669;48303;56520;70215	521	1878	0_2_44_3_2_0_0_0_0_1_0
45048	EXNG224	Australia	2011	12040	70216	523	1879	0_2_44_1_0_0_0_1_0_0_0
45049	EXNG234	Australia	2011	12045	70217	1071	1880	0_2_45_2_4_0_0_0_0_1_0
45050	EXNG235	Australia	2012	1924	9883;17672;25419;48305	227	1881	0_18_4_0_0_0_0_0_0_0_0
45051	EXNG236	Australia	2012	12045	70218	1071	1882	0_2_45_2_4_0_0_1_0_0_0
45052	EXNG248	Australia	2012	7359	1978;17674;56521	223	1883	1_8_6_0_2_0_0_0_2_1_0
45053	EXNG250	Australia	2012	1584	112133	41	1884	1_1_2_0_4_0_0_0_0_0_0
45054	EXNG253	Australia	2012	12040	70220	523	1885	0_2_44_1_2_0_0_1_0_0_0
45055	EXNG254	Australia	2012	7363	70221	1072	1886	0_2_44_0_0_0_0_0_0_0_0
45056	EXNG259	Australia	2012	12040	70222	523	1887	0_2_44_1_2_1_0_0_0_0_0
45057	EXNG261	Australia	2012	12042	1986;17679;38537;48311;52177;56523	522	1888	0_16_6_0_0_0_1_0_0_0_0
45058	EXNG264	Australia	2012	12042	1989;17680;38538;48312;52178;54063	522	1889	0_16_6_0_0_0_1_0_0_2_0
45059	EXNG266	Australia	2012	7363	1990;17681;48313;53908;70223	521	1890	0_2_44_3_12_0_0_0_0_0_0
45060	EXNG271	Australia	2013	12042	1991;17682;38539;48314;52179;54064	522	1891	0_16_6_0_0_0_1_0_0_3_0
45061	EXNG272	Australia	2013	7363	70224	1072	1892	0_2_44_0_0_0_0_0_0_0_0
45062	EXNG277	Australia	2013	12044	70225	1073	1893	0_2_46_0_0_0_0_0_0_0_0
45063	EXNG278	Australia	2013	12046	70226	1071	1894	0_2_45_1_0_0_0_0_0_0_0
45064	EXNG282	Australia	2013	12045	70227	1071	1895	0_2_45_2_3_0_0_0_0_0_0
45065	EXNG285	Australia	2013	12045	70228	1071	1896	0_2_45_2_1_0_0_0_0_0_0
45066	EXNG289	Australia	2013	7363	2010;17688;25422;48320;56524;70229	521	1897	0_2_44_5_0_0_0_0_0_0_0
45067	EXNG290	Australia	2011	12046	70230	1071	1898	0_2_45_0_0_0_0_1_0_1_0
45068	EXNG294	Australia	2013	12042	2012;17690;38540;48322;52180;56525	522	1899	0_16_6_0_0_0_1_0_2_0_0
45070	EXNG296	Australia	2013	12042	2013;17692;38541;48323;52181;54065	522	1901	0_16_6_0_0_0_1_0_0_4_0
45073	EXNG309	Australia	2013	1579	1855;17695;25423;48324;52182;98368	24	1904;38626	0_0_43_1_0_35_0_0_0_0_0
45074	EXNG314	Australia	2013	12042	2014;17696;48325;54066	522	1905	0_16_6_1_0_0_0_0_0_0_0
45075	EXNG316	Australia	2013	7359	2015;17697;56526	223	1906	1_8_6_0_2_0_0_0_9_0_0
45330	EXNG322	Australia	2013	8149	2017;17698;48326;52183;70233	527	1907	5_2_2_0_0_0_0_0_0_0_0
46272	32867	Canada	2010	1901	1933	18	1916	0_0_12_2_26_0_1_0_0_0_0	SRR1661227
46275	FA19	USA	1962	1892	2067;17708;56528;70242	405	1919	1_8_2_0_0_0_0_0_0_0_0
46276	FA6140	USA	1983	1927	70243	409	1920	0_12_0_0_2_0_0_0_0_0_0
46278	SRR515980	USA	1960	6959	2076;17711;54068	406	1922	0_0_0_0_0_0_0_0_0_2_0	SRR515980
46849	521112	Norway	2015	1901	1954;17722;48329;70248	18	1938	0_0_12_2_27_0_0_0_0_0_0	ERR3325210
46853	523392	Norway	2015	12459	1958;17726;48330;52191;70251	241	1942	0_19_0_0_0_0_0_0_0_0_0	ERR3325212
46854	523399	Norway	2015	7359	2100;17727;56531	223	1943	1_8_6_0_2_25_0_0_0_0_0	ERR3325213
46856	523471	Norway	2015	7359	2106;17728;80178	223	1945	1_8_6_0_2_0_8_0_0_0_0	ERR3325215
46858	523475	Norway	2015	12460	9899;17729;48332	416	1947	0_0_18_8_0_0_0_0_0_0_0	ERR3325217
46859	523848	Norway	2015	1587	1850;17730	239	1948	0_7_0_4_10_0_0_0_0_0_0	ERR3325218
46868	529019	Norway	2016	12461	9902;17738;25433;48333;52192;70258	62	1957	0_0_26_11_0_0_0_0_0_0_0	ERR3325222
46869	529558	Norway	2016	1901	1865;17739	3	1958	0_2_0_1_2_0_0_0_0_0_0	ERR3325226
46872	529316	Norway	2016	7363	1866;17742;48335	8	1961	0_2_17_0_9_19_0_0_0_0_0	ERR3325225
46874	529017	Norway	2016	7823	1979;17744;48336;70260	133	1963	0_2_9_3_11_0_0_0_0_0_0	ERR3325221
46875	532439	Norway	2016	13923	70261	425	1964	1_8_3_8_0_0_0_0_0_0_0	ERR3325244
46877	533451	Norway	2016	1588	70262	21	1966	0_0_33_24_29_0_0_0_0_0_0	ERR3325247
46882	534296	Norway	2016	1901	1985;17750;48340	18	1969	0_0_12_2_12_0_0_0_0_0_0	ERR3325257
46887	530060	Norway	2016	9900	1988;17752	133	1973	0_2_9_17_0_0_0_0_0_0_0	ERR3325234
46892	518244	Norway	2015	8122	70268	446	1978	19_0_1_0_0_20_0_0_0_0_0	ERR3325200
46897	518644	Norway	2015	8776	1996;17761;25436;48342;56539	236	1983	0_18_1_0_1_0_0_0_0_0_0	ERR3325203
46899	519451	Norway	2015	8122	70270	446	1985	19_0_1_0_0_14_0_5_0_0_0	ERR3325207
46902	518063	Norway	2015	11985	1874;17766	133	1988	0_2_9_14_26_0_0_0_0_0_0	ERR3325198
46907	529782	Norway	2016	7359	2146;17771;56540	223	1993	1_8_6_0_2_16_0_0_0_0_0	ERR3325231
46910	529785	Norway	2016	8774	70272	1074	1996	0_0_34_0_0_0_0_0_0_0_0	ERR3325232
46913	530056	Norway	2016	8122	70273	446	1999	19_0_1_0_0_22_0_0_0_0_0	ERR3325233
46917	534211	Norway	2016	7359	2155;17779;56544	223	2001	1_8_6_0_2_8_0_0_0_0_0	ERR3325249
46924	534289	Norway	2016	14334	2021;17785	18	2008	0_0_12_2_19_0_0_0_0_0_0	ERR3325255
46926	535699	Norway	2016	8136	70277;105060	1075	2010	0_0_18_22_0_0_0_0_0_0_0	ERR3325264
46930	531223	Norway	2016	9363	1893	16	2014	0_2_1_0_92_0_0_0_0_0_0	ERR3325239
46931	534273	Norway	2016	1901	2028;17790;48351	18	2015	0_0_12_2_14_0_0_0_0_0_0	ERR3325252
46932	534321	Norway	2016	1579	2029;17791;25442	24	2016	0_0_43_1_1_0_0_0_0_0_0	ERR3325258
46933	ECDC_1820984	Iceland	2013	11979	2177;17792;25443;48352	531	2017	0_0_20_0_0_0_0_0_0_0_0	ERR1549757
46935	538145	Norway	2016	1901	2031;17794;48353;70279	18	2019	0_0_12_2_6_0_0_0_0_0_0	ERR3325279
46936	538826	Norway	2016	12463	70280	1076	2020	0_0_29_3_1_0_0_0_0_0_0	ERR3325283
46939	534452	Norway	2016	14332	2035;17797;48356	96	2023	0_18_8_1_6_0_0_0_0_0_0	ERR3325261
46940	536169	Norway	2016	10316	70281	1077	2024	1_1_31_0_1_0_0_0_0_0_0	ERR3325266
46942	536447	Norway	2016	1892	70282;118978	425	2026;52003	1_8_3_0_13_0_0_0_0_0_0	ERR3325269
46946	517052	Norway	2016	8122	70284	446	2030	19_0_1_0_3_0_0_0_0_0_0	ERR3325196
46949	534206	Norway	2016	10316	70286	1077	2033	1_1_31_0_0_0_0_0_0_0_0	ERR3325248
46951	537058	Norway	2016	8145	112140	41	2035	1_1_2_22_0_0_0_0_0_0_0	ERR3325274
46953	536292	Norway	2016	10634	112141	532	2037	2_0_1_0_0_0_0_0_0_0_0	ERR3325268
46954	534323	Norway	2016	1587	1903;17807	239	2038	0_7_0_4_14_0_0_0_0_0_0	ERR3325259
46955	534219	Norway	2016	11750	70289	1079	2039	1_1_33_0_0_0_0_0_0_0_0	ERR3325250
46956	539414	Norway	2016	8156	2052;17809	17	2040	0_2_15_0_19_49_0_0_0_0_0	ERR3325284
46957	538405	Norway	2016	14335	2053;17810;48368	96	2041	0_18_8_1_5_0_0_0_0_0_0	ERR3325281
46958	537159	Norway	2016	1600	2199;17811	533	2042	0_0_46_1_0_1_0_0_0_0_0	ERR3325275
46960	534235	Norway	2016	11750	70290	1079	2044	1_1_33_0_1_0_0_0_0_0_0	ERR3325251
46962	539460	Norway	2016	1579	1906;25447	344	2046	0_2_5_0_0_0_0_0_0_0_0	ERR3325287
46964	536928	Norway	2016	7823	70291;91783	133	2048	0_2_9_3_12_0_0_0_0_0_0	ERR3325273
47029	GNCWGS_04CD	China	2013		2064;17820;54072	258	2052	0_0_58_1_1_0_0_0_0_1_0	SRR4011646
47030	GNCWGS_05OP	China	2013	11969	2065;17821;70293	259	2053;9137	0_2_0_38_0_0_0_0_0_0_0	SRR4011647
47031	GNCWGS_061Z	China	2013	1583	1915;54073;70294	345	2054	0_2_49_1_0_1_0_0_0_0_0	SRR4011648
47033	GNCWGS_0747_64	China	2013	7360	1917;24132;25448;56553	346	2056;2057;3795;9156	0_0_14_0_3_0_0_0_0_0_0	SRR4011650
47034	GNCWGS_075N_65	China	2013	7360	9925;17823;25449;56554	346	2057	0_0_14_0_3_0_0_0_0_0_0	SRR4011651
47035	GNCWGS_07AD_68	China	2013	7365	70296	1080	2058	0_2_51_0_0_0_0_0_0_0_0	SRR4011652
47036	GNCWGS_07AG_69	China	2013	7365	70297;91785	1080	2059	0_2_51_0_0_0_0_0_0_1_0	SRR4011631
47037	GNCWGS_07D1_70	China	2013	1902	2072;56555	263	2060;2061;3799;9159	0_2_23_0_0_1_0_0_0_0_0	SRR4011632
47038	GNCWGS_07ED_71	China	2013	1902	2073;56556	263	2061	0_2_23_0_0_1_0_0_0_0_0	SRR4011633
47039	GNCWGS_037L_77	China	2013	1902	2074;17826	264	2062	0_0_13_0_0_0_0_0_0_0_0	SRR4011634
47040	GNCWGS_03A0_78	China	2013	1588	70298	21	2063	0_0_33_30_0_0_0_0_0_0_0	SRR4011635
47041	GNCWGS_03AR_104	China	2013	1588	70299;80183	21	2063;2064;9163	0_0_33_30_0_0_0_0_0_0_0	SRR4011636
47042	GNCWGS_03WO_81	China	2014		70300	1066	2065	0_0_52_0_0_0_1_0_1_0_0	SRR4011637
47048	GNCWGS_M1KK_99	China	2014	7822	2210;17832;52199	3	2071	0_2_0_21_0_0_0_0_0_0_0	SRR4011644
47350	SRR3343475	UK [England]	2013	1596	2214;17835;25451;70305	450	2074	1_12_0_0_2_0_1_0_2_0_0	SRR3343475
47352	SRR3343477	UK [England]	2013	1901	1940;48372	3	2076	0_2_0_1_204_0_0_0_0_0_0	SRR3343477
47361	SRR3343487	UK		1899	2223;17840	404	2084	6_0_1_0_0_0_0_0_0_0_0	SRR3343487
47369	SRR3343495	UK [England]	2013	7822	2104	133	2092;2093;2161;2163;2164;2181;2224;3404	0_2_9_14_6_0_0_0_0_2_0	SRR3343495
47372	SRR3343498	UK [England]	2013	9363	2107;17847;38544	16	2094	0_2_1_0_73_7_0_3_0_0_0	SRR3343498
47375	SRR3343501	UK [England]	2013	11172	70314	41	2097	1_1_2_0_27_0_0_0_0_0_0	SRR3343501
47378	SRR3343504	UK [England]	2013	11516	70315	516	2100	0_18_13_0_2_0_0_0_0_0_0	SRR3343504
47381	SRR3343507	UK [England]	2013	1893	70316	31	2102	0_2_29_2_3_0_2_0_0_0_0	SRR3343507
47385	SRR3343511	UK [England]	2013	8122	70318	446	2106	19_0_1_0_0_14_0_0_3_0_0	SRR3343511
47389	SRR3343515	UK [England]	2013	9363	1964	16	2075;2105;2110;2179;2202	0_2_1_0_73_46_0_0_1_0_0	SRR3343515
47393	SRR3343519	UK [England]	2013	11249	6800;17855;25454;48373;52200;53843	236	2114	0_18_1_2_0_0_0_0_0_0_0	SRR3343519
47396	SRR3343522	UK		1899		404			SRR3343522
47404	SRR3343530	UK [England]	2013	1579	2134;17862;25456	24	2124	0_0_43_1_0_22_3_1_0_5_0	SRR3343530
47413	SRR3343539	UK [England]	2013	12467	2258;17869;24133;48374;70330	535	2131	1_11_0_0_0_1_0_0_0_0_0	SRR3343539
47423	SRR3343549	UK		1899	2277;17876	404	2139;2218	6_0_1_0_0_0_0_0_0_0_0	SRR3343549
47426	SRR3343552	UK		1899	2278;17878	404	2084;2139;2142;2200;2218;2230;26322	6_0_1_0_0_0_0_0_0_0_0	SRR3343552
47429	SRR3343555	UK [England]	2013	1588	2284;17881;56560	21	2145	0_0_33_12_76_0_1_0_0_0_0	SRR3343555
47430	SRR3343556	UK [England]	2013	1584	112145	41	2146;2150;2158;2203;2211	1_1_2_0_15_0_0_1_0_0_0	SRR3343556
47432	SRR3343558	UK [England]	2013	7822	2158	133	2092;2093;2161;2163;2164;2181;2224;3404	0_2_9_14_6_0_0_0_0_2_0	SRR3343558
47436	SRR3343562	UK [England]	2013	11516	70340	516	2151	0_18_13_0_0_0_1_0_0_1_0	SRR3343562
47440	SRR3343566	UK [England]	2013	7363	70344	196	2155	0_0_52_1_1_0_0_0_3_1_0	SRR3343566
47442	SRR3343568	UK [England]	2013	1596	2302;17891;25459;70345	450	2083;2157	1_12_0_1_0_0_1_0_0_0_0	SRR3343568
47451	SRR3343578	UK [England]	2013	7822	2174	133	2164	0_2_9_14_6_0_0_0_0_2_0	SRR3343578
47457	SRR3343584	UK		1899	2316;17899	404	2084;2139;2142;2200;2218;2230;26322	6_0_1_0_0_0_0_0_0_0_0	SRR3343584
47458	SRR3343585	UK [England]	2013	9363	1994	16	2168	0_2_1_0_73_22_0_0_0_2_0	SRR3343585
47469	SRR3343596	UK [England]	2013	1901	2188	18	2177	0_0_12_2_3_13_0_0_0_0_0	SRR3343596
47474	SRR3343601	UK [England]	2013	7822	2192	133	2181	0_2_9_14_6_0_0_0_0_2_0	SRR3343601
47478	SRR3343605	UK [England]	2013	12492	112148	41	2185	1_1_2_0_26_4_0_0_0_0_0	SRR3343605
47481	SRR3343608	UK [England]	2013	8122	70356	446	2188	19_0_1_0_0_14_0_0_3_0_0	SRR3343608
47485	SRR3343613	UK [England]	2013	1893	70358	31	2191	0_2_29_2_3_0_2_0_0_0_0	SRR3343613
47490	SRR3343618	UK [England]	2013	1588	2344;17912;56561	21	2195	0_0_33_12_76_0_1_0_0_0_0	SRR3343618
47493	SRR3343621	UK [England]	2013	1580	2206	16	2198	0_2_1_0_67_2_0_0_1_0_0	SRR3343621
47497	SRR3343626	UK		1899	2351;17916	404	2200	6_0_1_0_0_0_0_0_0_0_0	SRR3343626
47499	SRR3343628	UK [England]	2013	9363	9935	16	2202	0_2_1_0_73_46_0_0_1_0_0	SRR3343628
47504	SRR3343633	UK [England]	2013	9363	2025	16	2205	0_2_1_0_73_22_0_0_0_2_0	SRR3343633
47505	SRR3343635	UK [England]	2013	8122	70365	446	2206	19_0_1_0_0_14_0_0_3_0_0	SRR3343635
47512	SRR3343643	UK [England]	2013	1594	2377;17926	414	2212	1_8_5_0_63_0_0_0_0_0_0	SRR3343643
47518	SRR3343650	UK		1899	2397;17929	404	2218	6_0_1_0_0_0_0_0_0_0_0	SRR3343650
47524	SRR3343657	UK [England]	2013	7822	2235	133	2224	0_2_9_14_6_0_0_0_0_2_0	SRR3343657
47525	SRR3343659	UK [England]	2013	8122	70371	446	1755;2086;2103;2106;2107;2125;2129;2134;2136;2137;2154;2162;2170;2188;2190;2206;2209;2240;2312;2386;3689	19_0_1_0_0_14_0_0_3_0_0	SRR3343659
47527	SRR3343661	UK [England]	2013	1901	2043	3	2226	0_2_0_1_27_3_0_0_0_0_0	SRR3343661
47532	SRR3343666	UK [England]	2012	1584	112151	41	2229	1_1_2_0_26_2_1_0_0_0_0	SRR3343666
47533	SRR3343667	UK		1899	2413;17936	404	2230	6_0_1_0_0_0_0_0_0_0_0	SRR3343667
47537	SRR3343672	UK [England]	2013	11231	9938;17939	149	2234	0_2_64_1_1_0_0_0_0_0_0	SRR3343672
47539	SRR3343674	UK [England]	2013	11516	70376	516	2236	0_18_13_0_4_0_0_0_0_0_0	SRR3343674
47546	SRR3343682	UK [England]	2013	7363	70379	196	2242	0_0_52_1_1_0_0_0_3_0_0	SRR3343682
47547	SRR3349137	UK [England]	2013	1582	70380	416	2243	0_0_18_3_3_1_1_0_0_0_0	SRR3349137
47552	SRR3349142	UK [England]	2013	1901	2068	3	2247;2253;2271;2296;2318;2371;2407	0_2_0_1_0_109_1_0_0_0_0	SRR3349142
47559	SRR3349150	UK [England]	2013	11420	2078	16	2248;2254;2308;2317;2347;2389;2391;2398;10232	0_2_1_0_112_0_0_0_0_0_0	SRR3349150
47562	SRR3349153	UK [England]	2013	11516	70386	516	1753;2236;2244;2255;2257	0_18_13_0_4_0_0_0_0_0_0	SRR3349153
47564	SRR3349165	UK [England]	2013	1580	2274;17954	16	2259	0_2_1_0_55_0_0_0_1_0_0	SRR3349165
47568	SRR3349169	UK [England]	2013	8122	70389	446	2263	19_0_1_0_0_14_0_0_3_0_0	SRR3349169
47574	SRR3349175	UK [England]	2013	1596	2476;17959;25467;70394	450	2268	1_12_0_0_3_0_0_0_0_0_0	SRR3349175
47575	SRR3349176	UK [England]	2013	1579	2285;17960;25468	24	2269	0_0_43_1_0_22_3_1_0_0_0	SRR3349176
47583	SRR3349184	UK [England]	2013	1596	2482;17963;25469;70400	450	2275	1_12_0_0_3_0_0_0_0_1_0	SRR3349184
47586	SRR3349187	UK [England]	2013	1893	70403	31	2191;2278	0_2_29_2_3_0_2_0_0_0_0	SRR3349187
47588	SRR3349189	UK [England]	2013	1584	112153	41	2279	1_1_2_0_15_0_0_1_0_1_0	SRR3349189
47590	SRR3349191	UK [England]	2013	11516	70181;70407	516	1753	0_18_13_0_4_0_0_0_0_0_0	SRR3349191
47591	SRR3349192	UK [England]	2013	1584	112154	41	2281;2351;2360;2375;2417;2801;2807;2811;2814;2818;2863;2865;2913;2920;2934;2940;2952;2959;2991	1_1_2_0_15_0_3_0_0_0_0	SRR3349192
47596	SRR3349197	UK [England]	2013	12500	70411	1063	2285	0_0_41_1_0_0_0_0_0_0_0	SRR3349197
47597	SRR3349198	UK [England]	2013	1584	112155	41	2286	1_1_2_0_15_0_0_1_0_0_2	SRR3349198
47601	SRR3349202	UK [England]	2013	11516	70413	516	2290	0_18_13_0_4_0_1_0_0_0_0	SRR3349202
47604	SRR3349205	UK [England]	2013	1596	2509;17977;25472;70415	450	2293	1_12_0_0_2_0_1_0_0_0_0	SRR3349205
47609	SRR3349210	UK [England]	2013	1901	2317	18	2298	0_0_12_2_24_0_0_3_0_0_0	SRR3349210
47612	SRR3349213	UK [England]	2013	11420	2099	16	2248;2254;2308;2317;2347;2389;2391;2398;10232	0_2_1_0_112_0_0_0_0_0_0	SRR3349213
47615	SRR3349216	UK [England]	2013	11463	2101	16	2245;2364;2373	0_2_1_0_73_6_11_1_0_0_0	SRR3349216
47617	SRR3349218	UK [England]	2013	9363	2109	16	2302	0_2_1_0_73_8_0_0_0_0_0	SRR3349218
47620	SRR3349221	UK [England]	2013	11420	2120	16	2305	0_2_1_0_112_0_0_0_0_1_0	SRR3349221
47622	SRR3349223	UK [England]	2013	1893	70424	31	2307	0_2_29_2_3_0_2_0_0_0_0	SRR3349223
47625	SRR3349226	UK [England]	2013	11986	2333	17	2310	0_2_15_0_50_0_0_0_0_0_0	SRR3349226
47629	SRR3349230	UK [England]	2013	11420	2124	16	2314	0_2_1_0_73_53_0_0_1_3_0	SRR3349230
47631	SRR3349232	UK [England]	2013	7363	70428	196	2316;2519;2556	0_0_52_1_1_0_7_0_0_1_1	SRR3349232
47632	SRR3349233	UK [England]	2013	11420	2125	16	2317	0_2_1_0_112_0_0_0_0_0_0	SRR3349233
47635	SRR3349236	UK [England]	2013	9363	2141	16	2319	0_2_1_0_73_9_0_0_0_1_0	SRR3349236
47637	SRR3349238	UK [England]	2013	1893	70431	31	2321	0_2_29_2_3_0_2_0_0_0_0	SRR3349238
47645	SRR3349246	UK [England]	2013	1893	70437	31	2329	0_2_29_2_3_0_2_0_0_1_0	SRR3349246
47651	SRR3349252	UK [England]	2013	1579	2359;17995;25475	24	2335	0_0_43_1_0_22_0_2_3_1_0	SRR3349252
47659	SRR3349260	UK [England]	2013	1893	70443	31	2342	0_2_29_2_3_0_2_0_0_0_0	SRR3349260
47663	SRR3349264	UK [England]	2013	1579	2371;17999;25476	24	2346	0_0_43_1_0_22_0_2_3_1_0	SRR3349264
47668	SRR3349269	UK [England]	2013	1584	112157	41	2351	1_1_2_0_15_0_3_0_0_0_0	SRR3349269
47676	SRR3349277	UK [England]	2013	1599	70452	243	2304;2359	1_1_17_6_1_2_1_0_0_0_0	SRR3349277
47683	SRR3349284	UK [England]	2013	11463	2202	16	2245;2364;2373	0_2_1_0_73_6_11_1_0_0_0	SRR3349284
47690	SRR3349291	UK [England]	2013	11516	70461	516	1753;2236;2244;2255;2257	0_18_13_0_4_0_0_0_0_0_0	SRR3349291
47691	SRR3349292	UK [England]	2013	1893	70462	31	2370	0_2_29_2_3_0_2_0_0_0_0	SRR3349292
47694	SRR3349295	UK [England]	2013	1893	70463	31	2270	0_2_29_2_6_0_0_0_0_0_0	SRR3349295
47698	SRR3349299	UK [England]	2013	1584	112161	41	2375	1_1_2_0_15_0_3_0_0_0_0	SRR3349299
47705	SRR3349306	UK [England]	2013	8122	70470	446	2381	19_0_1_0_0_14_0_0_3_2_0	SRR3349306
47707	SRR3349308	UK [England]	2013	9362	9950;18016	16	2383	0_2_1_0_183_7_0_0_0_0_0	SRR3349308
47711	SRR3349312	UK [England]	2013	1893	70473	31	2102;2361;2387;2388	0_2_29_2_3_0_2_0_0_0_0	SRR3349312
47723	SRR3349324	UK [England]	2013	11420	2255	16	2398	0_2_1_0_112_0_0_0_0_0_0	SRR3349324
47734	SRR3349335	UK [England]	2013	1594	2596;18027;25479	414	2409	1_8_5_0_40_0_0_0_0_0_0	SRR3349335
47740	SRR3349341	UK [England]	2013	8122	70484	446	2263;2312;2415;2435	19_0_1_0_0_14_0_0_3_0_0	SRR3349341
47750	SRR3349517	UK [England]	2014	1588	70489	21	2424	0_0_33_24_3_0_0_0_1_1_0	SRR3349517
47759	SRR3349527	UK [England]	2013	7827	2467;18042	219	2433;8498	0_2_53_2_50_0_0_0_0_0_0	SRR3349527
47761	SRR3349529	UK [England]	2013	8122	70492	446	2435	19_0_1_0_0_14_0_0_3_0_0	SRR3349529
47771	SRR3349540	UK [England]	2014	1902	2633;18050;105062	537	2445	0_0_9_0_0_0_0_0_0_0_0	SRR3349540
47776	SRR3349546	UK [England]	2014	1583	2644;18052	538	2450	0_2_21_0_0_0_1_0_0_0_0	SRR3349546
47777	SRR3349547	UK [England]	2014	8122	70499	446	2451	19_0_1_0_0_14_0_0_2_24_0	SRR3349547
47786	SRR3349557	UK [England]	2014	9362	2328;18059;25482	16	2459	0_2_1_0_183_3_0_0_0_0_0	SRR3349557
47794	SRR3349565	UK [England]	2014	1588	70506	21	2467	0_0_33_24_3_2_0_0_0_0_0	SRR3349565
47796	SRR3349567	UK [England]	2014	1584	112168	41	2469	1_1_2_0_15_0_3_0_0_1_0	SRR3349567
47797	SRR3349568	UK [England]	2014	1583	2661;18067	538	2450;2470;2576	0_2_21_0_0_0_1_0_0_0_0	SRR3349568
47799	SRR3349570	UK [England]	2014	1579	2507	3	2472	0_2_0_1_69_2_0_0_1_0_0	SRR3349570
47800	SRR3349572	UK [England]	2014	8143	2508;18068	62	2473	0_0_26_6_0_1_0_0_0_0_0	SRR3349572
47802	SRR3349574	UK [England]	2014	1579	2510;18070;25484	24	2475	0_0_43_1_0_22_1_1_2_0_0	SRR3349574
47808	SRR3349580	UK [England]	2014	8122	70513	446	2481	19_0_1_0_0_14_0_0_2_6_0	SRR3349580
47810	SRR3349582	UK [England]	2013	1579	2518;18075;25487	24	2483	0_0_43_1_0_22_3_1_0_0_0	SRR3349582
47811	SRR3349583	UK [England]	2014	7822	2519	133	2468;2484;2904	0_2_9_14_6_8_0_0_0_0_1	SRR3349583
47812	SRR3349584	UK [England]	2014	1918	70514	415	2485	26_0_0_0_10_0_0_0_0_0_0	SRR3349584
47817	SRR3349590	UK [England]	2014	7822	2525;18079	133	2490	0_2_9_14_11_0_0_0_4_0_0	SRR3349590
47818	SRR3349591	UK [England]	2014	1893	70516	31	2491	0_2_29_2_2_1_0_0_0_0_0	SRR3349591
47823	SRR3349597	UK [England]	2014	1584	112169	41	2496	1_1_2_0_15_0_3_0_0_1_0	SRR3349597
47828	SRR3349602	UK [England]	2014	8122	70522	446	2451;2501	19_0_1_0_0_14_0_0_2_24_0	SRR3349602
47829	SRR3349603	UK [England]	2014	1587	2343;18087	239	2502	0_7_0_4_1_0_0_0_0_0_0	SRR3349603
47830	SRR3349604	UK [England]	2014	8156	2538	17	2503	0_2_15_0_19_25_0_0_0_2_0	SRR3349604
47842	SRR3349618	UK [England]	2013	7363	70525	196	2513	0_0_52_1_1_32_0_0_0_0_0	SRR3349618
47846	SRR3349622	UK [England]	2013	11710	2554;18095	133	2517	0_2_9_14_11_1_0_0_0_0_0	SRR3349622
47847	SRR3349623	UK [England]	2014	7363	70528	196	2518	0_0_52_1_3_0_0_0_1_0_0	SRR3349623
47849	SRR3349625	UK [England]	2014	1584	112170	41	2520	1_1_2_0_15_0_0_1_0_9_0	SRR3349625
47854	SRR3349631	UK [England]	2014	7822	2562;18100	133	2524	0_2_9_14_11_0_0_0_0_0_0	SRR3349631
47858	SRR3349635	UK [England]	2013	1579	2566;18102;25491	24	2528;2553	0_0_43_1_0_40_0_0_0_1_0	SRR3349635
47862	SRR3349639	UK [England]	2014	1588	70536	21	2532	0_0_33_24_3_0_0_0_0_0_0	SRR3349639
47876	SRR3349655	UK [England]	2014	1588	70541	21	2455;2532;2552;2563	0_0_33_24_3_0_0_0_0_0_0	SRR3349655
47881	SRR3349661	UK [England]	2014	1893	70543	31	2550	0_2_29_2_3_0_2_0_0_2_0	SRR3349661
47882	SRR3349662	UK [England]	2014	8143	2590;18116	62	2430;2473;2590;2808;2820;2985	0_0_26_6_0_1_0_0_0_0_0	SRR3349662
47888	SRR3349669	UK [England]	2013	7363	70546	196	2556	0_0_52_1_1_0_7_0_0_1_1	SRR3349669
47889	SRR3349670	UK [England]	2014	1587	2381;18121	239	2557	0_7_0_4_1_0_0_0_1_0_0	SRR3349670
47894	SRR3349675	UK [England]	2014	11516	70549	516	2562	0_18_13_0_0_2_0_0_0_0_0	SRR3349675
47901	SRR3349683	UK [England]	2013	11990	2759;18130;105064	414	2569	1_8_5_0_52_5_0_0_0_0_0	SRR3349683
47908	SRR3349691	UK [England]	2014	1583	2767;18132	538	2576	0_2_21_0_0_0_1_0_0_0_0	SRR3349691
47909	SRR3349692	UK [England]	2014	9363	2404	16	2577	0_2_1_0_111_0_0_0_0_1_0	SRR3349692
47910	SRR3349693	UK [England]	2013	7363	70555	196	2578	0_0_52_1_1_0_7_0_0_3_0	SRR3349693
47920	SRR3349703	UK [England]	2014	11864	70558	16	2588	0_2_1_1_4_0_1_0_0_3_0	SRR3349703
47923	SRR3349706	UK [England]	2014	7822	2631	133	2468;2484;2904	0_2_9_14_6_8_0_0_0_0_1	SRR3349706
47924	SRR3349707	UK [England]	2014	7822	2632	133	2591	0_2_9_14_6_8_0_0_0_1_0	SRR3349707
47926	SRR3349709	UK [England]	2014	1918	70560	415	2485	26_0_0_0_10_0_0_0_0_0_0	SRR3349709
47936	SRR3349719	UK [England]	2014	8776	70564;91792	21	2601	0_0_33_40_0_4_0_0_3_0_0	SRR3349719
47939	SRR3349722	UK [England]	2014	1918	70565	415	2604	26_0_0_0_10_0_0_0_0_1_0	SRR3349722
47943	SRR3349726	UK [England]	2014	1584	112173	41	2608	1_1_2_0_15_0_3_3_0_0_0	SRR3349726
47948	SRR3349812	UK [England]	2012	7826	79906;105065	223	2613	1_8_6_0_13_2_0_0_0_1_0	SRR3349812
47951	SRR3349815	UK [England]	2011	11463	2436	16	2616	0_2_1_0_73_6_10_3_0_0_0	SRR3349815
47955	SRR3349819	UK [England]	2011	10932	2815;18155;80190	304	2620	0_0_1_0_20_0_0_0_0_0_0	SRR3349819
47958	SRR3349822	UK [England]	2012	1588	2817;18157;56574	21	2623	0_0_33_12_76_0_0_0_0_0_0	SRR3349822
47959	SRR3349823	UK [England]	2011	9363	2441	16	2624	0_2_1_0_73_6_24_0_0_0_0	SRR3349823
47967	SRR3349831	UK [England]	2012	7363	70571	196	2632	0_0_52_1_1_0_0_0_5_1_0	SRR3349831
47968	SRR3349832	UK [England]	2011	1901	2676	18	2633	0_0_12_2_3_29_0_1_3_0_0	SRR3349832
47970	SRR3349834	UK [England]	2012	11428	2479	16	2635	0_2_1_0_73_30_3_0_0_0_0	SRR3349834
47976	SRR3349840	UK [England]	2011	8122	70572	446	2641	19_0_1_0_1_0_0_0_0_2_0	SRR3349840
47977	SRR3349841	UK [England]	2012	9363	2492	16	2642	0_2_1_0_73_46_0_0_0_0_0	SRR3349841
47979	SRR3349843	UK [England]	2011	7363	70573	196	2644	0_0_52_1_1_0_0_0_5_0_1	SRR3349843
47996	SRR3349861	UK [England]	2012	1596	2872;18172;25501;70578	450	2657;2661	1_12_0_1_0_0_0_0_0_1_0	SRR3349861
48003	SRR3349868	UK [England]	2011	1901	2711	18	2667	0_0_12_2_3_16_0_0_0_0_0	SRR3349868
48004	SRR3349869	UK [England]	2011	10931	2876;18176	422	2668	0_12_9_1_0_0_0_0_0_2_0	SRR3349869
48008	SRR3349873	UK [England]	2012	9363	2561	16	2672	0_2_1_0_73_6_0_0_1_0_0	SRR3349873
48015	SRR3349880	UK [England]	2011	1588	2903;18183;80191	21	2678	0_0_33_12_58_0_0_0_0_0_0	SRR3349880
48016	SRR3349881	UK [England]	2011	1579	2721;18184;25502	24	2679	0_0_43_1_0_17_1_0_0_0_0	SRR3349881
48018	SRR3349883	UK [England]	2011	7363	70582	196	2681	0_0_52_1_1_0_0_0_5_0_1	SRR3349883
48022	SRR3349887	UK [England]	2012	7363	70584	196	1523;11687	0_0_52_1_1_0_0_0_5_0_0	SRR3349887
48025	SRR3349890	UK [England]	2012	1588	2917;18189;56578;70585	21	2686	0_0_33_12_76_0_0_0_0_0_0	SRR3349890
48027	SRR3349892	UK [England]	2011	8163	2918;18190;70586	439	2688	5_2_0_1_3_0_0_0_0_0_0	SRR3349892
48033	SRR3349898	UK [England]	2011	7363	70588	196	2694	0_0_52_1_1_0_0_0_2_2_0	SRR3349898
48034	SRR3349899	UK [England]	2012	1902	2938;18196	42	2695	0_0_8_1_6_0_0_0_0_0_0	SRR3349899
48037	SRR3349902	UK [England]	2011	1901	2613;70590	3	2698	0_2_0_1_0_0_0_0_2_0_0	SRR3349902
48040	SRR3349905	UK [England]	2011	7363	70592	196	2700	0_0_52_1_1_0_0_0_2_0_0	SRR3349905
48051	SRR3349916	UK [England]	2012	10317	112174	41	2711	1_1_2_9_0_0_1_0_0_1_0	SRR3349916
48054	SRR3349919	UK [England]	2011	8123	2758;18205	271	2714	0_2_35_0_0_0_0_0_0_0_0	SRR3349919
48057	SRR3349922	UK [England]	2011	9363	2643	16	2717	0_2_1_0_73_6_0_3_0_0_0	SRR3349922
48062	SRR3349927	UK [England]	2011	1901	2659	3	326;329;1760;2737;2993;3008;3050;3073;3085;3108	0_2_0_1_0_0_32_0_1_0_0	SRR3349927
48065	SRR3349930	UK [England]	2012	7363	70597	196	2723	0_0_52_1_1_27_0_0_0_0_0	SRR3349930
48069	SRR3349934	UK [England]	2011	1901	2773	18	2727	0_0_12_2_3_29_0_1_0_0_0	SRR3349934
48072	SRR3349937	UK [England]	2011	1901	2776	18	2730	0_0_12_2_3_0_2_0_4_0_0	SRR3349937
48073	SRR3349938	UK [England]	2012	11990	2969;18211	414	2731	1_8_5_0_58_0_0_0_0_1_0	SRR3349938
48074	SRR3349939	UK [England]	2011	11990	2974;18212;105072	414	2732	1_8_5_0_52_12_0_0_0_1_0	SRR3349939
48075	SRR3349940	UK [England]	2012	7826	79912;105073	223	2733	1_8_6_0_13_1_0_0_2_0_0	SRR3349940
48079	SRR3349944	UK [England]	2011	1901	2672	3	2737	0_2_0_1_0_0_32_0_1_0_0	SRR3349944
48081	SRR3349946	UK [England]	2012	1901	2785	18	2739	0_0_12_2_3_29_0_1_0_0_0	SRR3349946
48082	SRR3349947	UK [England]	2011	10931	2980;18214	422	2646;2673;2740;2747	0_12_9_1_0_0_0_0_0_0_0	SRR3349947
48086	SRR3349951	UK [England]	2012	9363	2790;18218	16	2652;2758	0_2_1_0_73_119_0_0_0_1_0	SRR3349951
48088	SRR3349953	UK [England]	2012	11990	2993;18219	414	2745	1_8_5_0_58_0_0_0_0_0_0	SRR3349953
48090	SRR3349955	UK [England]	2011	10931	3004;18220	422	2747	0_12_9_1_0_0_0_0_0_0_0	SRR3349955
48095	SRR3349960	UK [England]	2011	9363	2685	16	2751	0_2_1_0_73_46_0_0_2_0_0	SRR3349960
48097	SRR3349962	UK [England]	2012	1585	112176	44	2752	1_1_22_3_1_0_0_0_0_0_0	SRR3349962
48099	SRR3349964	UK [England]	2012	11990	3010;18224	414	2754	1_8_5_0_52_3_0_0_0_0_0	SRR3349964
48104	SRR3349969	UK [England]	2011	12517	2689	3	2759	0_2_0_1_0_43_0_0_0_0_0	SRR3349969
48110	SRR3349975	UK [England]	2011	11990	3021;18228	414	2639;2699;2764	1_8_5_0_53_0_0_0_0_0_0	SRR3349975
48112	SRR3349977	UK [England]	2012	1901	2814	18	2766	0_0_12_2_3_38_0_0_0_0_0	SRR3349977
48113	SRR3349978	UK [England]	2012	11990	3024;18230	414	2767	1_8_5_0_58_0_0_0_0_2_0	SRR3349978
48125	SRR3349990	UK [England]	2011	11990	3053;18237;105074	414	2777;2798	1_8_5_0_52_12_0_0_0_0_0	SRR3349990
48126	SRR3349991	UK [England]	2012	8776	70610;91793	21	2778	0_0_33_40_0_0_0_0_0_0_0	SRR3349991
48128	SRR3349993	UK [England]	2012	7826	79913;105075	223	2780	1_8_6_0_13_2_0_0_0_0_0	SRR3349993
48136	SRR3350001	UK [England]	2012	11990	3069;18242	414	2767;2788	1_8_5_0_58_0_0_0_0_2_0	SRR3350001
48138	SRR3350003	UK [England]	2011	9363	2731	16	2790	0_2_1_0_151_0_0_0_0_0_0	SRR3350003
48147	SRR3350084	UK [England]	2014	11956	70614	222	2799	0_0_30_0_2_0_0_0_0_0_0	SRR3350084
48152	SRR3350089	UK [England]	2014	11864	70618	16	2804	0_2_1_1_4_0_1_0_0_0_0	SRR3350089
48153	SRR3350090	UK [England]	2014	7359	3078;18249;80192	223	2805	1_8_6_0_2_0_0_0_7_0_0	SRR3350090
48158	SRR3350095	UK [England]	2014	9363	2747	16	2810	0_2_1_0_73_8_0_0_0_9_0	SRR3350095
48164	SRR3350101	UK [England]	2014	11956	70626	222	2816	0_0_30_0_2_0_0_1_0_0_0	SRR3350101
48169	SRR3350106	UK [England]	2014	8143	2870;18260	62	2820	0_0_26_6_0_1_0_0_0_0_0	SRR3350106
48171	SRR3350108	UK [England]	2014	8122	70632	446	2822	19_0_1_0_0_14_0_0_2_17_0	SRR3350108
48175	SRR3350112	UK [England]	2014	1587	2753;18262	239	2826	0_7_0_4_23_0_1_0_0_0_0	SRR3350112
48195	SRR3350132	UK [England]	2014	8130	70643	222	2846	0_0_30_0_1_0_0_0_0_0_0	SRR3350132
48199	SRR3350136	UK [England]	2014	11990	3113;18272;105078	414	2850	1_8_5_0_52_5_1_0_0_0_0	SRR3350136
48200	SRR3350137	UK [England]	2014	1584	112189	41	2851	1_1_2_0_15_1_0_0_0_2_0	SRR3350137
48202	SRR3350139	UK [England]	2014	8122	70648	446	2852	19_0_1_0_0_14_0_0_10_0_0	SRR3350139
48211	SRR3350148	UK [England]	2014	1901	2780;18279	3	2861	0_2_0_1_0_33_0_1_3_0_0	SRR3350148
48213	SRR3350150	UK [England]	2014	1584	112190	41	2863	1_1_2_0_15_0_3_0_0_0_0	SRR3350150
48214	SRR3350151	UK [England]	2014	11420	10002	16	2864	0_2_1_0_73_53_0_0_2_1_0	SRR3350151
48226	SRR3350163	UK [England]	2014	11864	70663	16	2876	0_2_1_1_4_1_0_0_0_1_0	SRR3350163
48227	SRR3350164	UK [England]	2014	11979	3150;18287;25510	531	2877	0_0_20_0_0_0_0_0_0_1_0	SRR3350164
48234	SRR3350171	UK [England]	2014	7822	2932	133	2884	0_2_9_14_6_8_0_0_2_0_0	SRR3350171
48235	SRR3350172	UK [England]	2014	11428	2795	16	2885	0_2_1_0_135_3_0_0_0_0_0	SRR3350172
48238	SRR3350175	UK [England]	2014	12519	2936	18	2888	0_0_12_2_3_20_0_0_0_0_0	SRR3350175
48243	SRR3350180	UK [England]	2014	7827	3171;18293	539	2893	0_0_33_64_0_0_0_0_0_0_0	SRR3350180
48244	SRR3350181	UK [England]	2014	11864	70671	16	2894	0_2_1_1_4_0_1_0_0_0_0	SRR3350181
48250	SRR3350187	UK [England]	2014	11990	3173;18297;105079	414	2900	1_8_5_0_52_5_1_1_0_0_0	SRR3350187
48251	SRR3350188	UK [England]	2014	11993	3174;18298;25511	450	2901	1_12_0_2_1_0_1_0_0_0_0	SRR3350188
48254	SRR3350191	UK [England]	2014	8122	70676	446	2903;3092	19_0_1_0_0_14_0_0_8_0_0	SRR3350191
48266	SRR3350204	UK [England]	2014	11864	70683	16	2915	0_2_1_1_4_0_2_0_0_1_0	SRR3350204
48268	SRR3350206	UK [England]	2014	11956	70685	222	2917	0_0_30_0_2_0_0_0_0_1_0	SRR3350206
48278	SRR3350216	UK [England]	2014	1584	112200	41	2927	1_1_2_0_15_0_3_0_0_3_0	SRR3350216
48284	SRR3350222	UK [England]	2014	11864	70692	16	2933	0_2_1_1_4_0_1_0_0_2_0	SRR3350222
48286	SRR3350224	UK [England]	2014	11956	70694	222	2935	0_0_30_0_0_0_0_0_0_0_0	SRR3350224
48287	SRR3350225	UK [England]	2014	7359	3184;18316;56582	223	2936	1_8_6_0_2_0_0_0_0_6_0	SRR3350225
48291	SRR3350229	UK [England]	2014	1584	112202	41	2818;2940;2959	1_1_2_0_15_0_3_0_0_0_0	SRR3350229
48306	SRR3350244	UK [England]	2014	7363	70707	196	2953	0_0_52_1_1_7_0_0_0_9_0	SRR3350244
48309	SRR3350247	UK [England]	2014	1901	2836	3	2956	0_2_0_1_0_8_0_0_2_0_0	SRR3350247
48312	SRR3350250	UK [England]	2014	1584	112208	41	2959	1_1_2_0_15_0_3_0_0_0_0	SRR3350250
48318	SRR3350256	UK [England]	2014	9363	2842	16	2965	0_2_1_0_124_0_0_0_0_0_0	SRR3350256
48325	SRR3350263	UK [England]	2014	8776	70716;91796	21	2972	0_0_33_40_0_4_0_0_3_0_0	SRR3350263
48328	SRR3350266	UK [England]	2014	1594	3193;18340;24162	414	2975	1_8_5_0_38_0_0_1_0_1_0	SRR3350266
48339	SRR3350280	UK [England]	2014	11990	3194;18343;105081	414	2984	1_8_5_0_52_5_1_1_0_1_0	SRR3350280
48340	SRR3350281	UK [England]	2014	8143	3022;18344	62	2985	0_0_26_6_0_1_0_0_0_0_0	SRR3350281
48348	SRR3357011	UK [England]	2011	1901	2874	3	2993	0_2_0_1_0_0_32_0_1_0_0	SRR3357011
48349	SRR3357012	UK [England]	2011	10932	3197;18349;56584	304	2994	0_0_1_0_26_0_0_0_0_0_0	SRR3357012
48351	SRR3357014	UK [England]	2011	12504	70726	1082	2995	0_2_66_0_0_0_0_0_0_0_0	SRR3357014
48353	SRR3357016	UK [England]	2014	8143	3032;18351;82020	62	2997	0_0_26_3_7_2_0_0_0_0_0	SRR3357016
48354	SRR3357017	UK [England]	2011	1901	2878	3	2998	0_2_0_1_27_13_0_0_0_0_0	SRR3357017
48356	SRR3357019	UK [England]	2015	9363	2879	16	3000	0_2_1_0_94_2_1_0_0_0_0	SRR3357019
48361	SRR3357024	UK [England]	2011	1588	3198;18353;56585	21	3005	0_0_33_12_58_0_0_0_0_0_0	SRR3357024
48362	SRR3357025	UK [England]	2014	9363	3041;18354	16	3006	0_2_1_0_73_119_2_0_0_0_0	SRR3357025
48367	SRR3357030	UK [England]	2014	1596	70729;80193	450	3010	1_12_0_0_12_0_1_0_0_0_0	SRR3357030
48370	SRR3357036	UK [England]	2015	11231	10014;18357	149	3012	0_2_64_1_1_1_0_0_0_0_0	SRR3357036
48376	SRR3357047	UK [England]	2014	1588	70731	21	3018	0_0_33_24_3_1_0_0_0_0_0	SRR3357047
48377	SRR3357062	UK [England]	2014	11956	70732	222	3019	0_0_30_0_2_0_0_0_0_0_0	SRR3357062
48387	SRR3357111	UK [England]	2014	11956	70736	222	3029	0_0_30_0_2_0_0_0_0_2_0	SRR3357111
48388	SRR3357112	UK [England]	2011	1596	3203;18364;25518;70737	450	3030	1_12_0_0_2_0_2_0_0_1_0	SRR3357112
48395	SRR3357132	UK [England]	2011	7823	70738	133	3037	0_2_9_6_0_0_0_0_0_0_0	SRR3357132
48398	SRR3357135	UK [England]	2014	1901	2928;18367;101500	3	3040;41484	0_2_0_1_35_3_0_0_0_0_0	SRR3357135
48399	SRR3357136	UK [England]	2011	11990	3205;18368;105082	414	3041	1_8_5_0_52_12_0_0_0_2_0	SRR3357136
48405	SRR3357142	UK [England]	2015	11516	70742	516	3046	0_18_13_0_10_0_0_0_2_0_0	SRR3357142
48413	SRR3357150	UK [England]	2014	8143	3081;18376	62	3052	0_0_26_6_0_1_0_0_0_5_0	SRR3357150
48422	SRR3357160	UK [England]	2011	11463	2945	16	3060	0_2_1_0_73_6_19_0_0_0_0	SRR3357160
48425	SRR3357163	UK [England]	2011	11463	2947	16	3062	0_2_1_0_73_6_11_0_0_0_0	SRR3357163
48430	SRR3357168	UK [England]	2015	7363	70748	196	3066	0_0_52_1_6_0_0_0_0_0_0	SRR3357168
48436	SRR3357174	UK [England]	2011	11428	2970	16	3071	0_2_1_0_73_30_0_0_0_0_1	SRR3357174
48447	SRR3357185	UK [England]	2014	8143	3106;18382	62	2944;3079	0_0_26_6_0_1_2_0_0_0_0	SRR3357185
48454	SRR3357192	UK [England]	2011	1901	2996	3	3086	0_2_0_1_0_0_32_0_1_2_0	SRR3357192
48463	SRR3357201	UK [England]	2011	8776	3116;18386;25521;56588	236	3093	0_18_1_0_0_0_0_0_0_0_0	SRR3357201
48468	SRR3357229	UK [England]	2011	1893	70756	31	3097	0_2_29_2_2_0_0_0_0_0_0	SRR3357229
48469	SRR3357241	UK [England]	2015	8156	3120	17	3098	0_2_15_0_19_2_0_0_0_0_0	SRR3357241
48470	SRR3357242	UK [England]	2011	11463	3003	16	3099	0_2_1_0_73_6_11_0_0_1_0	SRR3357242
48493	SRR3357265	UK [England]	2011	1901	3031	3	3117	0_2_0_1_0_48_0_0_1_0_0	SRR3357265
48504	SRR3357276	UK [England]	2015	7822	3146	133	3128	0_2_9_14_6_8_0_1_0_0_0	SRR3357276
48506	SRR3357278	UK [England]	2014	9363	3048	16	3130	0_2_1_0_81_1_0_1_0_0_0	SRR3357278
48507	SRR3357279	UK [England]	2011	8114	70765	44	3131	1_1_22_9_0_2_1_1_0_0_0	SRR3357279
48510	SRR3357283	UK		1899		404			SRR3357283
48520	SRR3357305	UK [England]	2011	8126	3157	16	3141	0_2_1_0_32_0_0_0_0_0_0	SRR3357305
48533	SRR3357318	UK [England]	2011	9363	3066	16	3151	0_2_1_0_73_87_2_0_0_0_0	SRR3357318
48539	SRR3357352	UK [England]	2015	11864	70771	16	3156	0_2_1_1_4_2_1_0_0_4_0	SRR3357352
48544	SRR3357357	UK [England]	2014	11516	70774	516	3161	0_18_13_0_10_1_0_0_0_0_0	SRR3357357
48559	SRR3360298	UK [England]	2012	11990	3269;18410	414	3171	1_8_5_0_54_9_1_0_0_0_0	SRR3360298
48563	SRR3360302	UK [England]	2012	11990	3274;18414	414	3175	1_8_5_0_54_9_1_0_1_0_0	SRR3360302
48568	SRR3360307	UK [England]	2013	11990	3281;18417	414	3178	1_8_5_0_54_9_1_0_2_0_0	SRR3360307
48584	SRR3360323	UK [England]	2010	11990	3289;18420	414	3185	1_8_5_0_54_1_0_0_0_0_0	SRR3360323
48586	SRR3360325	UK [England]	2012	11990	3290;18421	414	3187	1_8_5_0_54_9_1_0_0_1_0	SRR3360325
48588	SRR3360327	UK [England]	2012	11990	3295;18423	414	3189	1_8_5_0_54_6_1_0_0_0_0	SRR3360327
48589	SRR3360328	UK [England]	2013	1594	3298;18424	414	3190	1_8_5_0_61_0_0_0_0_0_0	SRR3360328
48593	SRR3360332	UK [England]	2013	11990	3314;18427	414	3193	1_8_5_0_54_9_1_0_3_0_0	SRR3360332
48594	SRR3360333	UK [England]	2010	11990	3315;18428	414	3194	1_8_5_0_54_0_0_0_0_1_0	SRR3360333
48616	SRR3360355	UK [England]	2012	11990	3326;18433;105083	414	3202	1_8_5_0_52_12_0_0_0_4_0	SRR3360355
48617	SRR3360356	UK [England]	2013	11990	3327;18434	414	3203	1_8_5_0_52_11_0_1_0_0_0	SRR3360356
48636	SRR3360622	UK [England]	2009	1901	3088;85069	3	3220	0_2_0_1_0_73_0_0_4_1_0	SRR3360622
48638	SRR3360624	UK [England]	2005	1588	3345;18441;56592	21	3221	0_0_33_12_3_0_0_0_0_0_0	SRR3360624
48644	SRR3360630	UK [England]	2009	1931	112220	1083	3227	1_1_14_0_0_0_0_0_0_0_0	SRR3360630
48647	SRR3360633	UK [England]	2010	1901	3099	3	3230	0_2_0_1_27_0_0_0_0_1_0	SRR3360633
48653	SRR3360639	UK [England]	2008	1901	3238	18	3236	0_0_12_2_3_24_1_0_0_0_0	SRR3360639
48655	SRR3360641	UK [England]	2010	7363	70783	196	3238	0_0_52_1_1_0_0_0_2_8_0	SRR3360641
48656	SRR3360642	UK [England]	2010	11463	3100	16	3239	0_2_1_0_73_6_16_0_0_0_0	SRR3360642
48658	SRR3360644	UK [England]	2009	8784	3370;18453	416	3241	0_0_18_7_5_0_0_0_0_0_0	SRR3360644
48662	SRR3360648	UK [England]	2009	1901	3103	3	3245	0_2_0_1_0_0_0_0_0_4_0	SRR3360648
48663	SRR3360649	UK [England]	2008	1901	3247	18	3246	0_0_12_2_3_24_0_0_0_0_0	SRR3360649
48666	SRR3360652	UK [England]	2009	11191	3250	96	3249	0_18_8_0_0_1_0_0_0_0_0	SRR3360652
48667	SRR3360653	UK [England]	2007	1579	70785	24	3250	0_0_43_1_0_7_1_0_0_0_0	SRR3360653
48671	SRR3360657	UK [England]	2009	1901	3107;70786;85070	3	3254	0_2_0_1_0_73_0_0_4_1_0	SRR3360657
48674	SRR3360660	UK [Wales]	2005	1893	70789	31	3257	0_2_29_0_0_0_0_0_0_0_0	SRR3360660
48676	SRR3360662	UK [England]	2009	8163	3384;18459;70791	439	3259	5_2_0_1_17_0_0_0_0_0_0	SRR3360662
48681	SRR3360667	UK [England]	2010	1582	70793	416	3263	0_0_18_3_2_4_0_0_1_0_0	SRR3360667
48685	SRR3360671	UK [England]	2007	1901	3267	18	3267	0_0_12_2_3_0_0_0_2_0_0	SRR3360671
48692	SRR3360678	UK [England]	2007	1588	70795	21	3273	0_0_33_24_0_0_0_0_0_2_0	SRR3360678
48694	SRR3360680	UK [England]	2010	7363	70797	196	3275	0_0_52_1_1_0_0_0_2_10_0	SRR3360680
48701	SRR3360687	UK [England]	2007	1892	3413;18473;48382;54076;70799;79338	540	3281	1_8_4_0_0_0_0_0_0_0_0	SRR3360687
48704	SRR3360690	UK [England]	2009	11516	70801	516	3284	0_18_13_0_0_0_0_0_1_0_0	SRR3360690
48706	SRR3360692	UK [England]	2009	1584	112221	41	3286	1_1_2_0_26_1_0_0_0_0_0	SRR3360692
48708	SRR3360694	UK [England]	2007	1901	3287;18479;48384	18	3288	0_0_12_2_3_42_0_0_0_0_0	SRR3360694
48724	SRR3360710	UK [England]	2010	11463	3131	16	3304	0_2_1_0_73_6_16_0_1_0_0	SRR3360710
48727	SRR3360713	UK [England]	2010	8775	70810	1082	3307	0_2_66_0_1_0_0_0_0_0_0	SRR3360713
48732	SRR3360718	UK [England]	2010	1901	3137	3	3312	0_2_0_1_0_0_0_0_0_11_0	SRR3360718
48733	SRR3360719	UK [England]	2009	1901	3138	3	3313	0_2_0_1_0_109_0_0_0_0_0	SRR3360719
48735	SRR3360721	UK [England]	2009	1579	70812	24	3315	0_0_43_1_2_0_0_0_0_0_0	SRR3360721
48740	SRR3360726	UK [England]	2009	8122	70816	446	3320	19_0_1_0_0_8_1_0_0_0_0	SRR3360726
48741	SRR3360727	UK [England]	2010	10622	3451;18494;48388;70817	528	3321	0_20_3_0_0_0_0_0_0_0_0	SRR3360727
48747	SRR3360733	UK [England]	2009	1901	3145;85071	3	3326	0_2_0_1_0_73_0_0_4_2_0	SRR3360733
48754	SRR3360740	UK [England]	2010	1590	70819	505	3331	10_0_0_1_0_0_0_0_0_0_0	SRR3360740
48776	SRR3360774	UK [England]	2004	1582	70826	416	3352	0_0_18_3_1_0_0_0_0_0_0	SRR3360774
48784	SRR3360812	UK [England]	2013	11990	3488;18517;38548	414	3360	1_8_5_0_54_10_0_0_0_0_0	SRR3360812
48785	SRR3360813	UK [England]	2005	1901	3357	18	3361	0_0_12_2_3_26_0_0_0_0_0	SRR3360813
48789	SRR3360821	UK		10934	3494;18520;25539;52211;54077;80197;91799	441	3365;32749	34_0_0_0_0_0_0_0_0_0_0	SRR3360821
48792	SRR3360824	UK [England]	2012	8143	3364;18523;82022	62	3368	0_0_26_3_7_0_0_0_0_1_0	SRR3360824
48793	SRR3360825	UK		1902	3499;18524;25541	42	450;1038;3369;25911;26380	0_0_8_0_0_0_0_0_0_0_0	SRR3360825
48794	SRR3360826	UK [England]	2013	12507	3500;18525;52212;70832	439	3370	5_2_0_1_23_0_0_0_0_0_0	SRR3360826
48795	SRR3360827	UK [England]	2005	8114	70833	44	3371	1_1_22_9_0_3_0_0_0_0_0	SRR3360827
48796	SRR3360828	UK		1599	70834	1041	3372	0_2_31_0_0_0_0_0_0_1_0	SRR3360828
48797	SRR3360829	UK [England]	2004	8122	70835	446	3373	19_0_1_0_0_10_0_0_0_0_0	SRR3360829
48804	SRR3360836	UK [England]	2004	8148	70839	1049	3380	5_0_0_0_0_0_0_0_1_0_0	SRR3360836
48806	SRR3360838	UK		11987	14810;25543;48398;70840	576	3382	20_0_0_0_0_0_0_0_0_0_0	SRR3360838
48807	SRR3360839	UK [England]	2013	1594	3511;18535;25544	414	3383	1_8_5_0_39_2_0_0_0_0_0	SRR3360839
48809	SRR3360841	UK [England]	2013	9363	3380;18536	16	3385	0_2_1_0_73_119_1_2_0_0_0	SRR3360841
48812	SRR3360844	UK [England]	2013	9363	3217	16	3388	0_2_1_0_73_22_0_0_1_0_0	SRR3360844
48814	SRR3360846	UK [England]	2005	1582	70844	416	3390	0_0_18_3_2_2_1_1_0_1_0	SRR3360846
48816	SRR3360848	UK		1903	3387;18542;24158;70846	64	3392	0_2_37_0_0_0_0_0_0_0_0	SRR3360848
48819	SRR3360851	UK [England]	2005	1579	3219	3	3395	0_2_0_1_149_0_0_0_1_0_0	SRR3360851
48821	SRR3360853	UK [England]	2013	8122	70847	446	3397	19_0_1_0_0_14_0_0_2_4_0	SRR3360853
48824	SRR3360856	UK		7367	3394	95	3399	0_2_4_0_0_0_0_0_0_0_0	SRR3360856
48825	SRR3360857	UK [England]	2004	1588	3536;18547;70848;79339	21	3400	0_0_33_2_0_0_0_0_0_0_0	SRR3360857
48826	SRR3360858	UK		1590	3539;18548;25547;56606;98377	435	3401;38634	0_12_2_0_5_0_0_0_0_0_0	SRR3360858
48828	SRR3360860	UK		1588	3540;18549;48402;56607	21	3403	0_0_33_10_0_0_0_0_0_0_0	SRR3360860
48829	SRR3360861	UK [England]	2013	7822	3399	133	3404	0_2_9_14_6_0_0_0_0_2_0	SRR3360861
48840	SRR3360872	UK [England]	2004	8392	3556;18555;48404;52213;70853	486	3415	37_0_0_0_0_0_0_0_0_0_0	SRR3360872
48843	SRR3360875	UK [England]	2013	7363	70854	196	3412;3418	0_0_52_1_1_11_1_0_0_0_0	SRR3360875
48844	SRR3360876	UK [England]	2004	8148	70855	1049	3419	5_0_0_0_0_0_0_0_0_0_0	SRR3360876
48845	SRR3360877	UK [England]	2012	1596	3565;18558;24145;70856	450	3420	1_12_0_0_2_0_1_0_3_0_0	SRR3360877
48851	SRR3360883	UK [England]	2004	1587	3420;18561;54081	208	3426	0_2_36_3_1_0_0_0_0_0_0	SRR3360883
48852	SRR3360884	UK [England]	2013	1901	3421;18562;91800	18	3427	0_0_12_2_18_1_1_0_0_0_0	SRR3360884
48854	SRR3360886	UK [England]	2013	11990	3570;18563;105086	414	3428	1_8_5_0_52_5_0_0_0_1_0	SRR3360886
48856	SRR3360888	UK [England]	2013	1579	3425;18565;25549	24	3430;8321	0_0_43_1_0_22_0_0_2_0_0	SRR3360888
48857	SRR3360889	UK [England]	2004	1901	3244;18566;48408	3	3431	0_2_0_1_109_0_0_0_0_1_0	SRR3360889
48858	SRR3360890	UK [England]	2005	1892	70858	1059	3432	1_8_9_0_1_0_0_0_0_0_0	SRR3360890
48863	SRR3360895	UK [England]	2013	8135	70860	425	3437	1_8_3_6_0_2_0_0_1_0_0	SRR3360895
48866	SRR3360898	UK		10682	3582;18574;48410;53911;70862	410	3440	8_1_0_0_1_0_0_0_0_0_0	SRR3360898
48868	SRR3360900	UK		1902	70864	1023	3442	0_0_7_2_0_0_0_0_0_1_0	SRR3360900
48871	SRR3360904	UK [England]	2013	9363	3591;18578;48413;56613	304	3445	0_0_1_0_20_1_0_0_0_0_0	SRR3360904
48873	SRR3360906	UK [England]	2013	11986	3441	17	3447	0_2_15_0_47_0_0_0_1_1_0	SRR3360906
48875	SRR3360908	UK [England]	2013	1580	3443;52215;70865	16	3449	0_2_1_0_42_0_0_0_0_0_0	SRR3360908
48876	SRR3360909	UK [England]	2013	11986	3444	17	3450	0_2_15_0_47_0_0_0_0_2_0	SRR3360909
48878	SRR3360911	UK [England]	2013	11990	3597;18580;105088	414	3452	1_8_5_0_52_8_0_0_0_0_0	SRR3360911
48880	SRR3360913	UK [England]	2005	7367	70868	95	3454	0_2_4_2_1_0_0_0_0_0_0	SRR3360913
48883	SRR3360916	UK		1590	3601;18583;25551;48414;56614	435	3457	0_12_2_0_1_1_0_0_0_0_0	SRR3360916
48884	SRR3360917	UK [England]	2004	1904	3609;18584;52217	510	3458	0_1_0_0_0_0_0_0_0_0_0	SRR3360917
48888	SRR3360921	UK [England]	2004	7367	70871	95	3462	0_2_4_1_2_0_0_0_0_0_0	SRR3360921
48892	SRR3360925	UK [England]	2013	9363	3460;18590	16	3466	0_2_1_0_73_16_0_0_0_0_0	SRR3360925
48896	SRR3360930	UK [England]	2005	1901	3464	18	3470	0_0_12_2_3_0_0_0_9_14_0	SRR3360930
48897	SRR3360931	UK		10934	3612;18593;25554;52218;54082;70874;79340;91801	441	3365;3471;32749;32750	34_0_0_0_0_0_0_0_0_0_0	SRR3360931
48900	SRR3360934	UK		1590	3617;18595;25555;41022;48417;53912;53956	435	735;3474	0_12_2_0_2_0_0_1_0_0_0	SRR3360934
48902	SRR3360936	UK [England]	2004	8392	3619;18596;48419;52219;70876	486	3476	37_0_0_0_0_0_0_0_0_0_0	SRR3360936
48904	SRR3360938	UK		1583	3472;18598;54083;70877	132	3477	0_2_38_0_0_0_0_0_0_0_0	SRR3360938
48905	SRR3360939	UK [England]	2004	1590	3623;18599;41023;70878	505	3478	10_0_0_0_2_0_0_0_0_0_0	SRR3360939
48906	SRR3360940	UK [England]	2013	7363	70879;91802	196	3479	0_0_52_1_25_0_0_0_0_0_0	SRR3360940
48909	SRR3360943	UK [England]	2005	8114	70881	44	3482	1_1_22_9_0_7_1_0_0_0_0	SRR3360943
48912	SRR3360946	UK [England]	2012	8122	70882	446	3485	19_0_1_0_2_0_0_0_0_0_0	SRR3360946
48922	SRR3360957	UK [England]	2005	1582	70886	416	3495;3518	0_0_18_3_2_2_1_0_0_0_0	SRR3360957
48931	SRR3360966	UK [England]	2012	8122	70889	446	3504	19_0_1_0_0_14_0_0_0_0_0	SRR3360966
48932	SRR3360967	UK [England]	2004	8392	3659;18617;48427;52224;70890	486	3505	37_0_0_0_0_0_0_0_1_0_0	SRR3360967
48934	SRR3360969	UK [England]	2013	11191	3661;18619;25561;48428	124	3507	0_18_7_0_10_0_0_0_0_0_0	SRR3360969
48941	SRR3360976	UK [England]	2013	1588	70894	21	3514	0_0_33_24_7_0_0_0_0_0_0	SRR3360976
48943	SRR3360978	UK [England]	2013	7363	70896	196	3516	0_0_52_1_1_4_0_0_0_0_0	SRR3360978
48946	SRR3360981	UK [England]	2004	1579	3514;18629;25563;48431	24	3519	0_0_43_1_0_15_0_0_0_0_0	SRR3360981
48947	SRR3360982	UK [England]	2004	6960	112232	504	3520	0_16_2_0_0_0_0_0_0_0_0	SRR3360982
48953	SRR3360988	UK		11075	3688;18635;53914	517	3525	0_12_7_4_0_0_0_0_0_0_0	SRR3360988
48956	SRR3360991	UK [England]	2004	8392	3689;18637;48434;52227;70903	486	3528	37_0_0_0_0_0_0_0_0_0_0	SRR3360991
48958	SRR3360993	UK [England]	2004	8122	70904	446	3529	19_0_1_0_0_1_0_0_0_0_0	SRR3360993
48969	SRR3361011	UK [England]	2012	1918	70909	415	3540	26_0_0_0_6_1_0_0_0_0_0	SRR3361011
48972	SRR3361022	UK [England]	2012	8122	3710;18644;41024;48440;70910	446	3542	19_0_1_0_0_24_0_0_0_0_0	SRR3361022
48973	SRR3361023	UK [England]	2012	7363	70911	196	3543	0_0_52_1_1_0_1_0_0_0_1	SRR3361023
48979	SRR3361031	UK [England]	2012	1590	70912	505	3549	10_0_0_0_7_0_0_0_0_1_0	SRR3361031
48985	SRR3361073	UK [England]	2012	11428	3348	16	3554	0_2_1_0_73_30_0_0_0_7_0	SRR3361073
48987	SRR3361075	UK [England]	2012	11463	3350	16	3556	0_2_1_0_73_6_10_1_0_0_0	SRR3361075
48993	SRR3361101	UK [England]	2012	11428	10084	16	3562	0_2_1_0_73_31_2_0_0_0_0	SRR3361101
48997	SRR3361105	UK [England]	2012	1580	3564	16	3566	0_2_1_0_67_1_0_0_0_0_0	SRR3361105
48999	SRR3361109	UK [England]	2012	7363	70917	196	3568	0_0_52_1_1_0_0_0_2_5_0	SRR3361109
49000	SRR3361110	UK [England]	2012	11428	3373	16	3569;3695	0_2_1_0_73_30_0_0_0_4_1	SRR3361110
49005	SRR3361115	UK [England]	2012	11231	10085;18657	149	3574	0_2_64_1_1_0_1_0_0_0_0	SRR3361115
49010	SRR3361121	UK [England]	2012	11428	3383	16	3579	0_2_1_0_73_30_6_0_0_0_1	SRR3361121
49017	SRR3361129	UK [England]	2012	1903	70923	37	3586	0_0_47_5_1_0_0_0_0_0_0	SRR3361129
49020	SRR3361132	UK [England]	2012	11428	3401	16	3589	0_2_1_0_73_30_0_0_0_5_0	SRR3361132
49022	SRR3361134	UK [England]	2012	11428	3406	16	3591	0_2_1_0_73_30_0_0_0_9_0	SRR3361134
49023	SRR3361135	UK [England]	2012	1902	3746;18665	42	3592	0_0_8_1_6_0_0_0_1_0_0	SRR3361135
49024	SRR3361136	UK [England]	2012	8122	70924	446	3593	19_0_1_0_0_14_0_0_2_15_0	SRR3361136
49034	SRR3361146	UK [England]	2012	8122	70926	446	3603	19_0_1_0_1_0_0_0_1_0_0	SRR3361146
49055	SRR3361168	UK [England]	2012	7823	70931	133	3623	0_2_9_3_7_1_0_0_0_0_0	SRR3361168
49061	SRR3361174	UK [England]	2012	1596	3780;18682;24153;70932	450	3367;3459;3634	1_12_0_0_2_2_0_0_0_0_0	SRR3361174
49066	SRR3361179	UK [England]	2012	9363	3449	16	3630	0_2_1_0_86_0_0_0_0_3_0	SRR3361179
49071	SRR3361206	UK [England]	2012	1596	3790;18686;25567;70936	450	3634	1_12_0_0_2_2_0_0_0_0_0	SRR3361206
49077	SRR3361212	UK [England]	2012	7363	70937	196	1756	0_0_52_1_1_0_0_0_8_1_0	SRR3361212
49088	SRR3361223	UK [England]	2012	11967	3798;18694;56618	304	3650	0_0_1_0_3_0_0_0_0_0_0	SRR3361223
49091	SRR3361226	UK [England]	2012	11516	70942	516	3653	0_18_13_0_2_0_0_0_0_2_0	SRR3361226
49102	SRR3361237	UK [England]	2012	7363	70948	196	3661	0_0_52_1_1_0_0_0_2_2_0	SRR3361237
49104	SRR3361239	UK [England]	2012	1590	70949	505	3663	10_0_0_0_7_0_0_0_0_2_0	SRR3361239
49110	SRR3361245	UK [England]	2012	11172	112237	41	3669	1_1_2_0_26_3_0_0_2_0_0	SRR3361245
49113	SRR3361248	UK [England]	2012	1901	3678	18	3672	0_0_12_2_3_30_0_0_0_3_0	SRR3361248
49115	SRR3361250	UK [England]	2012	8122	70955	446	3674	19_0_1_0_0_14_0_0_2_27_0	SRR3361250
49118	SRR3361253	UK [England]	2012	11986	3683	17	3676	0_2_15_0_47_0_0_0_1_0_0	SRR3361253
49119	SRR3361254	UK [England]	2012	1584	112238	41	3677	1_1_2_11_0_0_0_0_0_0_0	SRR3361254
49122	SRR3361257	UK [England]	2012	8122	70958	446	3679	19_0_1_0_0_14_0_0_2_1_0	SRR3361257
49125	SRR3361260	UK [England]	2012	8122	70960	446	3681	19_0_1_0_0_14_0_0_2_0_0	SRR3361260
49128	SRR3361263	UK [England]	2012	11172	112239	41	327;330;3577;3684;3700	1_1_2_0_26_3_0_0_0_0_0	SRR3361263
49130	SRR3361265	UK [England]	2012	8122	70964	446	3685	19_0_1_0_0_14_0_0_2_1_0	SRR3361265
49153	SRR3361288	UK [England]	2012	11172	112242	41	3703	1_1_2_0_26_3_0_0_1_0_0	SRR3361288
49154	SRR3361289	UK [England]	2012	7363	3867;18732;48450;80202	196	3704	0_0_52_1_1_19_2_0_0_0_0	SRR3361289
49156	SRR3361291	UK [England]	2012	7363	70970	196	3706	0_0_52_1_1_0_0_0_5_2_0	SRR3361291
49172	SRR3361310	UK [England]	2010	1901	3551	3	3718	0_2_0_1_0_0_17_0_0_0_0	SRR3361310
49180	SRR3361318	UK [England]	2010	11990	3890;18743;105093	414	3726	1_8_5_0_52_13_0_0_0_0_0	SRR3361318
49181	SRR3361319	UK [England]	2009	8784	3895;18744	416	3727	0_0_18_7_5_0_0_0_0_0_0	SRR3361319
49190	SRR3361328	UK [England]	2010	10932	3567;18749;48457;56622	304	3735	0_0_1_0_16_0_0_0_0_0_0	SRR3361328
49191	SRR3361329	UK [England]	2009	1901	3569	3	3736	0_2_0_1_0_4_2_0_0_1_0	SRR3361329
49204	SRR3361343	UK [England]	2010	1892	70984	425	3277	1_8_3_0_15_0_0_0_0_0_0	SRR3361343
49205	SRR3361344	UK [England]	2010	1901	3579	3	3746	0_2_0_1_0_0_0_0_0_8_0	SRR3361344
49213	SRR3361352	UK [England]	2007	1931	112246	155	3754	1_1_27_1_0_0_0_0_0_0_0	SRR3361352
49218	SRR3361357	UK [England]	2009	11191	3775	96	3249;3759	0_18_8_0_0_1_0_0_0_0_0	SRR3361357
50483	541004	Norway	2016	1588	3948;18772;48467;70997;79341;101502	21	3775	0_0_33_53_0_0_1_0_0_0_0	ERR3325295
50484	541220	Norway	2016	7359	3949;18773;25580;56631	223	3776	1_8_6_0_2_0_0_1_2_0_0	ERR3325297
50493	542910	Norway	2016	7363	3607;18780	8	3784	0_2_17_0_9_13_0_0_0_0_0	ERR3325306
50513	546852	Norway	2016	8156	3807;18785	17	3790	0_2_15_0_19_54_0_0_0_0_0	ERR3325318
51103	549760	Norway	2017	7360	3831;18803;48475	3	3809	0_2_0_1_48_0_0_0_0_0_0	ERR3325325
51107	551147	Norway	2016	8135	71012	425	3813	1_8_3_6_0_9_0_0_0_0_0	ERR3325329
51109	542478	Norway	2016	7359	3999;18807;56642;91810	223	3815	1_8_6_0_2_0_6_0_0_1_0	ERR3325301
51111	551979	Norway	2016	13143	3839;18809	219	3817	0_2_53_2_51_11_0_0_0_0_0	ERR3325334
51114	552468	Norway	2016	8122	71014	446	3820	19_0_1_0_0_14_0_0_2_25_0	ERR3325337
51545	LNP28909	France	2017	11993	4022;18815;25773;48479	450	3824	1_12_0_2_1_1_0_0_0_0_0
51661	552837	Norway	2017	11367	4024;18818;48480	502	3827	0_2_54_0_0_0_0_0_0_0_0	ERR3325360
51662	552840	Norway	2017	7359	4026;18819;80206	223	3828	1_8_6_0_2_0_6_0_0_0_0	ERR3325361
51665	552878	Norway	2017	1901	3647;48481	3	3831	0_2_0_1_0_129_0_0_0_0_0	ERR3325371
51669	552858	Norway	2017	7363	71019	196	3834	0_0_52_1_8_0_0_0_0_0_0	ERR3325365
51671	552885	Norway	2017	13252	6827;18827;48485	96	3836	0_18_8_1_2_0_0_0_0_0_0	ERR3325372
51675	552896	Norway	2017	13252	6828;18830;25776;48487	96	3840	0_18_8_1_2_0_0_0_0_1_0	ERR3325376
51678	553545	Norway	2017	1579	3865;18831;25777	24	3843	0_0_43_1_0_22_6_0_0_0_0	ERR3325378
51679	553566	Norway	2017	7363	3653;18832	8	3844	0_2_17_0_9_0_5_0_0_0_0	ERR3325379
51682	553585	Norway	2017	7359	4043;18834;25779;56646	223	3847;5711	1_8_6_0_2_0_0_1_0_0_0	ERR3325382
51683	553599	Norway	2017	1588	4044;18835;48489;56647;71024	21	3848	0_0_33_12_61_0_0_0_0_0_0	ERR3325384
51687	553617	Norway	2017	1584	112248	41	3852	1_1_2_0_53_1_0_0_0_0_0	ERR3325388
51699	553832	Norway	2017	11999	3886	16	3863	0_2_1_0_61_0_0_0_1_3_0	ERR3325417
51703	556826	Norway	2017	7363	71036	196	3867	0_0_52_1_1_0_0_0_18_1_0	ERR3325503
51704	556830	Norway	2017	9363	3696;48497	16	3868;3875	0_2_1_0_74_0_0_0_0_0_0	ERR3325504
51707	556837	Norway	2017	8135	71037	425	3871	1_8_3_6_5_0_0_0_0_0_0	ERR3325507
51713	556860	Norway	2017	8156	3899	17	3876	0_2_15_0_19_52_0_0_0_0_0	ERR3325514
51714	556862	Norway	2017	12462	3900;18856;25785;48501;56649	244	3877	1_1_5_0_0_2_0_0_0_0_0	ERR3325515
51715	556874	Norway	2017	7827	3901;18857	219	3878	0_2_53_2_13_0_0_1_0_0_0	ERR3325516
51719	556884	Norway	2017	7363	71042	196	3882	0_0_52_1_1_0_0_0_18_2_0	ERR3325520
51721	556891	Norway	2017	1901	3907;18861;48502	3	3884	0_2_0_1_207_0_0_0_0_0_0	ERR3325522
51724	555507	Norway	2017	7363	71044	196	3887	0_0_52_1_12_0_0_0_0_0_0	ERR3325468
51733	555607	Norway	2017	8122	71048	446	3895	19_0_1_0_0_14_0_0_2_13_0	ERR3325478
51738	555122	Norway	2017	1599	71049	243	3900	1_1_17_6_1_9_0_0_0_1_0	ERR3325462
51740	556902	Norway	2017	11516	71050	516	3902	0_18_13_0_12_1_0_0_0_2_0	ERR3325524
51742	557179	Norway	2017	11516	71051	516	3904	0_18_13_0_0_1_0_1_0_1_0	ERR3325528
51743	554791	Norway	2017	8122	71052	446	3808;3913;3982;17259;26254	19_0_1_0_0_14_0_0_2_12_0	ERR3325451
51744	554793	Norway	2017	8143	3929;18881;82030	62	3905;5689	0_0_26_3_7_0_0_4_0_0_0	ERR3325452
51745	553711	Norway	2017	11189	3930;18882;48508;52246;71053	280	3906	0_20_7_0_0_0_0_0_0_0_0	ERR3325398
51753	553744	Norway	2017	8122	71056	446	3913	19_0_1_0_0_14_0_0_2_12_0	ERR3325408
51756	553756	Norway	2017	8143	3941;18892;82032	62	3916	0_0_26_3_7_0_0_5_0_0_0	ERR3325411
51757	553760	Norway	2017	1901	3729;18893	3	3917	0_2_0_1_0_104_0_1_0_0_1	ERR3325412
51759	553887	Norway	2017	1596	4120;18895;25793;71057	450	3919	1_12_0_0_2_1_0_0_0_2_0	ERR3325418
51764	554561	Norway	2017	11516	71059	516	3923	0_18_13_0_13_0_0_1_0_0_0	ERR3325423
51765	554563	Norway	2017	1587	3735;18901	239	3924;15479	0_7_0_4_6_0_0_0_0_0_0	ERR3325424
51770	554586	Norway	2017	13309	10141;18906;25797;48513;71061	62	3928	0_0_26_14_0_0_0_0_0_0_0	ERR3325429
51773	554621	Norway	2017	1929	4144;18909;25798;38554;48515	543	3931	1_1_37_0_0_0_0_0_0_0_0	ERR3325433
51781	554470	Norway	2017	8145	112251	41	3937	1_1_2_15_0_0_0_0_0_0_0	ERR3325420
51782	554674	Norway	2017	1600	4156;18916	533	3938	0_0_46_1_0_0_0_0_0_0_0	ERR3325441
51790	554739	Norway	2017	7363	3745;18922	8	3945	0_2_17_0_9_0_5_0_1_0_0	ERR3325449
51796	555919	Norway	2017	11516	71072	516	3948	0_18_13_0_12_1_0_0_0_0_0	ERR3325500
51798	555897	Norway	2017	1584	112253	41	3949	1_1_2_0_53_1_0_0_1_0_0	ERR3325498
51799	555876	Norway	2017	1599	3983;71075	243	3950	1_1_17_6_1_26_0_0_0_0_0	ERR3325497
51800	555834	Norway	2017	10314	3984;18930	3	3951	0_2_0_4_12_0_0_0_0_1_0	ERR3325491
51801	555830	Norway	2017	11431	4172;48520;56657	544	3952	0_0_27_0_1_0_0_0_0_0_0	ERR3325489
51806	555816	Norway	2017	7363	71078	196	3955	0_0_52_1_1_7_2_0_0_0_0	ERR3325484
51812	554801	Norway	2017	1893	71082;80211	31	3959	0_2_29_9_11_0_0_0_1_0_0	ERR3325456
51813	558222	Norway	2017	12463	71083	1076	3960	0_0_29_3_0_0_0_0_0_0_0	ERR3325530
51817	555861	Norway	2017	1596	71085;80212	450	3963	1_12_0_0_12_2_0_0_0_0_0	ERR3325495
51823	558902	Norway	2017	8156	4005;18947;56662	17	3968	0_2_15_0_19_28_0_0_0_0_0	ERR3325533
51825	559226	Norway	2017	1587	3763;18948	239	3970	0_7_0_4_16_0_0_0_0_0_0	ERR3325535
51826	559699	Norway	2017	1587	3765;18949;25810;52247;71088	239	3971	0_7_0_4_18_0_0_0_0_0_0	ERR3325536
51835	560642	Norway	2017	9363	3773;48529	16	3978	0_2_1_0_74_0_0_0_0_0_2	ERR3325544
51892	555564	Norway	2017	7363	71073;71092	196	3887	0_0_52_1_12_0_0_0_0_0_0	ERR3325474
51895	554795	Norway	2017	7359	4123;4192;18898;18932;18958;56659;56665	223	3847;5711	1_8_6_0_2_0_0_1_0_0_0	ERR3325453
51898	554804	Norway	2017	8122	71095	446	3982	19_0_1_0_0_14_0_0_2_12_0	ERR3325457
51899	554806	Norway	2017	1893	71096	31	3983	0_2_29_2_3_3_0_0_1_0_1	ERR3325458
52151	552524	Norway	2017	8122	71098	446	3986	19_0_1_0_0_14_6_0_0_0_0	ERR3325342
52154	552560	Norway	2017	7360	3782;25815;56667	346	3989	0_0_14_0_5_0_0_0_0_0_0	ERR3325345
52156	552580	Norway	2017	11189	4031;18967;48531;52248;71101	280	3991	0_20_7_0_0_1_0_0_0_0_0	ERR3325347
52158	552591	Norway	2017	9363	3787	16	3993	0_2_1_0_73_7_0_2_0_0_0	ERR3325350
52160	552602	Norway	2017	11177	4244;18970;25817;48532;52249;56668;71102	430	3995	45_0_0_0_0_2_0_0_0_0_0	ERR3325352
52162	552610	Norway	2017	11191	6832;18972;48533	96	3997	0_18_8_1_1_0_0_0_0_0_0	ERR3325354
52164	552474	Norway	2017	8163	4254;18974;71105	439	3999	5_2_0_1_28_0_0_0_0_0_0	ERR3325339
52165	552659	Norway	2017	14333	71106	446	4000	19_0_1_0_0_14_7_0_0_0_0	ERR3325355
52166	552828	Norway	2017	8122	71107	446	4001	19_0_1_0_0_14_2_0_0_0_0	ERR3325357
52753	Ng01-34	Australia		8775	4273;18979;25818;80215;98380	528	4004	0_20_3_1_1_0_0_0_0_0_0
52754	Ng23-78	Australia		7363	4274;18980;56670;71109	521	4005	0_2_44_3_3_0_0_0_0_0_0
52755	Ng21-17	Australia		7363	4275;18981;56671;71110	521	4006	0_2_44_3_0_0_0_0_0_0_0
52756	Ng22-19	Australia		12040	71111;80216	523	4007	0_2_44_1_1_0_0_0_0_0_0
52757	Ng23-57	Australia		8141	4282;18983;25819;98381	528	4008	0_20_3_1_2_0_0_0_0_0_0
52758	Ng34-63	Australia		7363	4289;18984;25820;56672;71112	521	4009	0_2_44_3_1_0_0_0_0_0_0
52759	Ng38-58	Australia		8775	4291;18985;25821;71113;79342;98382	528	4010	0_20_3_1_0_1_0_0_0_0_0
52760	Ng39-60	Australia		12045	71114	1071	4011	0_2_45_2_0_2_0_0_0_0_0
52761	Ng41-41	Australia		12906	4299;18987;53915;53966;71115	521	4012	0_2_44_3_0_1_0_0_0_0_0
52762	Ng41-67	Australia		8775	4302;18988;25822;52250;53845;71116;79343;98383	528	4013	0_20_3_1_0_0_0_0_0_0_0
52763	Ng42-42	Australia		12040	71117	523	4014	0_2_44_1_5_0_0_0_0_0_0
52764	Ng47-54	Australia		12040	71118	523	4015	0_2_44_1_5_2_0_0_0_0_0
52765	Ng50-32	Australia		12040	71119	523	4016	0_2_44_1_5_1_0_0_0_0_0
52766	Ng51-55	Australia		12040	71120	523	4017	0_2_44_1_4_0_0_0_0_0_0
52767	Ng51-59	Australia		12040	71121	523	4018	0_2_44_1_5_3_0_0_0_0_0
53452	568626	Norway	2017	13347	71122;82034	243	4020	1_1_17_6_2_0_0_0_0_0_0	ERR3325667
53455	592364	Norway	2017	7359	4353;18996;56677;90825	223	4021;31812	1_8_6_0_7_0_0_0_0_0_0	ERR3325879
53463	577982	Norway	2017	1587	3800;19000;71125;79344;82035;85078	239	4028	0_7_0_4_9_3_0_0_0_0_0	ERR3325802
53471	573138	Norway	2017	1594	4355;19007;25832	414	4035	1_8_5_0_24_0_0_0_0_0_0	ERR3325725
53540	515386	Norway	2016	11431	4356;25834;48542;54085;56681	544	4040	0_0_27_3_0_0_0_0_0_0_0	ERR3325187
53541	515634	Norway	2016	8122	71132	446	4041	19_0_1_0_0_17_0_0_0_0_0	ERR3325188
53545	516303	Norway	2016	1599	71133	243	4044	1_1_17_6_13_3_0_0_0_0_0	ERR3325192
53560	561473	Norway	2017	8143	4430;19019;25838;38557;50396;71138;90827	62	4052;31814	0_0_26_8_0_0_0_0_0_0_0	ERR3325554
53561	561285	Norway	2017	11431	4367;25839;52252;71139	545	4053	0_0_40_0_0_0_0_0_0_0_0	ERR3325552
53563	561738	Norway	2017	8130	4368;19020;25841;48545;80221;85080;90828;91814;101668;105097	546	4055;26386;31815;41633	0_0_29_2_0_0_0_0_0_0_0	ERR3325556
53569	561776	Norway	2017	8156	4092;19023;25844;80222	17	4061	0_2_15_0_19_33_0_0_0_0_0	ERR3325562
53572	562099	Norway	2017	1596	4379;19026;25845;56687;71144;85082	450	4064;26388	1_12_0_0_2_1_1_0_0_0_0	ERR3325564
53583	562700	Norway	2017	1599	71146	243	4068	1_1_17_6_15_0_0_0_0_0_0	ERR3325573
53591	567315	Norway	2017	7359	4409;19033;25847;56691;85086	223	4074;26392	1_8_6_0_2_0_0_1_4_0_0	ERR3325647
53593	567334	Norway	2017	7359	4410;19035;80224;85087	223	4076;26393	1_8_6_0_2_7_0_0_0_0_0	ERR3325651
53596	567385	Norway	2017	1931	112261	1085	4079;25818;26394;32762;38635	1_1_2_24_0_0_0_0_0_0_0	ERR3325658
53600	568533	Norway	2017	7360	9016;25852;45203;54086;56696;91823;105098	346	32763	0_0_14_0_12_0_0_0_0_0_0	ERR3325664
53614	563253	Norway	2017	11249	6833;19040;48562;52254;56699	236	4086	0_18_1_2_1_0_0_0_0_0_0	ERR3325589
53621	567052	Norway	2017	7359	4414;19043;56701	223	4091	1_8_6_0_2_0_0_2_0_0_0	ERR3325639
53625	567117	Norway	2017	14342	4416;19046;48566;56702;71154	21	4095	0_0_33_12_66_7_0_0_0_0_0	ERR3325643
53627	565763	Norway	2017	7359	4417;19048;25856;56703;101669	223	4097;41634	1_8_6_0_2_0_0_1_3_0_0	ERR3325628
53628	565874	Norway	2017	7363	4419;19049;25857;80227	196	4098	0_0_52_1_16_0_0_0_0_0_0	ERR3325629
53629	566481	Norway	2017	1599	71155;85092	243	4099;26397	1_1_17_6_1_9_3_0_4_0_0	ERR3325631
53634	566769	Norway	2017	8156	4129;19052;25860;71158;85093;101218	17	4104;26398;41245	0_2_15_0_19_3_10_0_0_0_0	ERR3325636
53635	566806	Norway	2017	7359	4421;19053;25861;56705	223	4105	1_8_6_0_2_0_0_1_0_3_0	ERR3325637
53644	562564	Norway	2017	1588	4426;19056;25863;48569;56707;71159;101670	21	4108	0_0_33_53_0_1_0_0_0_0_0	ERR3325566
53645	562571	Norway	2017	8123	4433;19057;25864;38563;56708;71160;91825	62	4109;32765	0_0_26_2_0_0_0_0_0_0_0	ERR3325568
53647	564104	Norway	2017	11428	3858;19059	16	4111	0_2_1_0_135_8_0_0_0_0_0	ERR3325595
53654	564719	Norway	2017	1893	112264	498	4118	0_16_0_2_4_0_0_0_0_0_0	ERR3325603
53656	564725	Norway	2017	7359	4431;19066;48576;56711	223	4120	1_8_6_0_2_10_0_0_0_0_0	ERR3325606
53658	564736	Norway	2017	1582	4145;19067;25869;45206;82041	62	4122	0_0_26_3_22_0_0_0_0_0_0	ERR3325608
53659	564776	Norway	2017	7359	4437;19068;56713	223	4123	1_8_6_0_2_1_0_0_0_0_0	ERR3325609
53660	565100	Norway	2017	8156	4147;19069;25870	17	4124	0_2_15_0_19_3_6_0_0_0_0	ERR3325611
53668	565460	Norway	2017	1584	112265	41	4132	1_1_2_0_53_1_0_0_3_0_0	ERR3325620
53677	567623	Norway	2017	1599	71168;85096	243	4140;26401	1_1_17_6_1_9_3_1_0_0_0	ERR3325660
54271	LRRBGS_0039	Brazil	2006	1901	4204;19120	18	4185	0_0_12_2_3_0_0_0_0_18_0
54273	LRRBGS_0041	Brazil	2006	1901	4206;19121;25901;48589	3	4187	0_2_0_1_134_5_0_0_0_0_0
54274	LRRBGS_0042	Brazil	2007	1588	4488;19122;56724;71181	21	4188	0_0_33_2_0_1_0_0_0_0_0
54292	LRRBGS_0060	Brazil	2010	1588	4491;19128;25906;52257;56727	21	4206	0_0_33_12_39_0_0_0_0_0_0
54293	LRRBGS_0061	Brazil	2010	1596	71184;80231	450	4207	1_12_0_0_6_0_0_0_0_0_0
54295	LRRBGS_0063	Brazil	2010	7367	71185;109241	95	4209	0_2_4_1_0_1_0_0_0_0_0
54300	LRRBGS_0068	Brazil	2010	8145	112267	41	4213	1_1_2_14_2_0_1_0_0_0_0
54306	LRRBGS_0074	Brazil	2010	1596	71191;80233	450	4218	1_12_0_0_8_0_0_0_0_0_0
54314	LRRBGS_0082	Brazil	2011	12905	71194	516	4223	0_18_13_0_17_0_0_0_0_0_0
54316	LRRBGS_0084	Brazil	2011	1588	4515;19144;25916;48606;56732	21	4225	0_0_33_12_66_3_0_0_0_0_0
54328	LRRBGS_0096	Brazil	2013	8134	4063;25921;85100	16	4237;26405	0_2_1_0_102_1_0_0_0_0_0
54329	LRRBGS_0097	Brazil	2013	11602	4065;19155;25922;41027;48611;85101;91834	3	4238;26406	0_2_0_1_101_1_0_0_0_0_0
54330	LRRBGS_0098	Brazil	2013	1588	4537;19156;25923;48612;71202;79348	21	4239	0_0_33_2_5_0_1_0_0_0_0
54333	LRRBGS_0101	Brazil	2013	1901	4071;25926;48614;71204	3	4242	0_2_0_1_98_4_0_0_0_0_0
54337	LRRBGS_0105	Brazil	2013	8133	79917;91835	21	4245;32772	0_0_33_33_0_0_0_0_0_0_0
54342	LRRBGS_0110	Brazil	2013	1921	4544;19163;25932;48618;56737;71207	21	4250	0_0_33_2_4_0_0_0_0_0_0
54343	LRRBGS_0111	Brazil	2013	11602	4083;25933;41030;48619	3	4251	0_2_0_1_101_0_0_0_0_0_0
54353	LRRBGS_0121	Brazil	2013	8145	112270	41	4260	1_1_2_14_2_2_0_0_0_0_0
54359	LRRBGS_0127	Brazil	2014	8145	112271	41	4265	1_1_2_14_3_0_0_0_0_0_0
54364	LRRBGS_0132	Brazil	2014	1588	4560;19176;38581;48630;56744	21	4270	0_0_33_12_38_0_0_0_0_0_0
54367	LRRBGS_0135	Brazil	2014	9363	4108;80238	16	4273	0_2_1_0_73_6_5_0_0_0_0
54375	LRRBGS_0143	Brazil	2014	11864	71225	16	4281	0_2_1_1_0_6_0_0_0_0_0
54380	LRRBGS_0148	Brazil	2015	7822	4293;19187	133	4286	0_2_9_14_11_3_0_0_0_1_0
56126	564723	Norway	2017	7363	71232	196	4295	0_0_52_1_1_0_0_6_0_0_0	ERR3325605
56128	567322	Norway	2017	14343	4539;19195;25960;38584;56752	278	4297	0_18_15_0_0_0_0_0_0_0_0	ERR3325648
56131	567752	Norway	2017	7363	71234	196	4300	0_0_52_1_12_1_0_0_0_0_0	ERR3325661
56138	569370	Norway	2017	8156	4309;19203;25962	17	4307	0_2_15_0_19_3_9_0_0_0_0	ERR3325681
56140	569376	Norway	2017	8156	4310;19205;38586	17	4309	0_2_15_0_19_11_0_2_0_0_0	ERR3325683
56161	571509	Norway	2017	10931	4643;19217;25970;41034;85109;91845	422	4324;26413;32780	0_12_9_3_1_5_0_0_0_0_0	ERR3325695
56163	571521	Norway	2017	1599	71240	243	4326	1_1_17_6_1_9_5_0_0_0_0	ERR3325698
56164	571547	Norway	2017	1599	71241	243	4327	1_1_17_6_1_9_9_0_0_0_0	ERR3325704
56171	573398	Norway	2017	8156	4331;19224;38588;85111;98392	17	4332;26415;38645	0_2_15_0_10_0_0_0_0_0_0	ERR3325729
56172	573406	Norway	2017	8156	4332;19225;25974;85112	17	4333;26416	0_2_15_0_19_15_0_0_0_0_0	ERR3325730
56173	573414	Norway	2017	1599	71243	243	4334	1_1_17_6_1_9_6_0_0_0_0	ERR3325731
56177	573969	Norway	2017	14345	4652;19229;25977;48661;50406;56762;71245;79351;90841;91848;101674;105115	546	4338;31830;41638	0_0_29_2_0_1_0_0_0_0_0	ERR3325740
56179	573974	Norway	2017	8156	4336;19231	17	4340	0_2_15_0_19_21_0_0_0_0_0	ERR3325742
56180	573976	Norway	2017	8156	4337;19232;25979;56764	17	4341	0_2_15_0_19_16_0_0_0_0_0	ERR3325743
56183	573718	Norway	2017	12463	71248	1076	4344	0_0_29_3_2_0_0_0_0_0_0	ERR3325738
56189	573982	Norway	2017	1599	71252;85115;91849	243	4350;26418	1_1_17_6_1_21_0_0_0_0_0	ERR3325746
56190	574623	Norway	2017	1599	71253;82044	243	4351	1_1_17_6_1_10_0_0_0_0_0	ERR3325749
56195	574853	Norway	2017	1583	71256;85117;91851	133	4356;26420;32783	0_2_9_9_7_0_0_0_0_0_0	ERR3325754
56199	575409	Norway	2017	1901	4181;19248	3	4360	0_2_0_1_0_107_0_0_0_0_0	ERR3325757
56200	575440	Norway	2017	13923	71257	425	4361	1_8_3_8_1_0_0_0_0_0_0	ERR3325758
56205	575786	Norway	2017	13409	71260;91852	133	4366;32784	0_2_9_9_6_0_0_0_0_0_0	ERR3325763
56208	575794	Norway	2017	1893	71261;98393	31	4369;38646	0_2_29_2_3_5_0_0_0_0_0	ERR3325766
56219	568824	Norway	2017	7359	4730;19264;25997;45225;56780	223	4379	1_8_6_0_2_0_4_0_0_0_0	ERR3325672
56222	570384	Norway	2017	1588	4732;19266;48679;56781;71268;101676	21	4382	0_0_33_53_0_2_0_0_0_0_0	ERR3325690
56243	591982	Norway	2017	8156	4378;19281;26010;48689;85127;101228	17	4399;26427;41255	0_2_15_0_19_41_0_0_0_0_0	ERR3325868
56247	580683	Norway	2017	1918	71279	509	4400	0_0_43_12_5_0_0_0_0_0_0	ERR3325833
56248	591432	Norway	2017	8156	15565;26012	17	4401	0_2_15_0_21_0_0_0_0_0_0	ERR3325858
56252	591426	Norway	2017	7827	4896;19284;56790	219	4404	0_2_53_2_13_12_0_0_0_0_0	ERR3325857
56257	591244	Norway	2017	1588	71282;91857;101229	21	4408;32789;41256	0_0_33_36_0_0_0_0_0_0_0	ERR3325851
56263	590462	Norway	2017	9363	4200;48694	16	4412	0_2_1_0_74_27_0_0_0_0_0	ERR3325842
56268	590005	Norway	2017	8156	4561;19292;26018;52279	17	4413	0_2_15_0_19_20_0_0_0_0_0	ERR3325840
56283	580147	Norway	2017	1599	71287;80252;85138;91858	243	4421;26436;32790	1_1_17_6_1_9_8_0_0_0_0	ERR3325825
56290	579028	Norway	2017	11428	4218;19302;56801	16	4428	0_2_1_0_185_5_0_0_0_0_0	ERR3325814
56295	577537	Norway	2017	11208	4564;19307;26029;48703;80254;90849;109249	62	4433;31838	0_0_26_10_0_0_0_0_0_0_0	ERR3325789
56303	577912	Norway	2017	8156	15561;71290	17	4439	0_2_15_0_46_1_0_0_0_0_0	ERR3325799
56308	577230	Norway	2017	7363	71293;91864	196	4444	0_0_52_1_1_0_17_0_0_0_0	ERR3325786
56421	037F	China	2013	1902	4440;19316	264	4446	0_0_13_0_0_0_0_0_0_0_0
56778	NG8a	Spain	2016	7363	10233;19324;26035;56808;71297;105120	8	4453;44427	0_2_17_0_13_0_0_0_0_1_0
57095	NG15	Spain	2016	1901	4265	3	4466	0_2_0_1_27_6_1_0_0_0_0
57101	NG21	Spain	2016	8156	4472;19342;38616	17	4472	0_2_15_0_19_3_0_0_0_1_0
57108	NG28	Spain	2016	10317	112278	41	4478	1_1_2_9_0_0_1_2_1_0_0
57110	NG30	Spain	2016	7359	4788;19349;26045;56810	223	4479	1_8_6_0_2_0_17_0_0_0_0
57112	NG32	Spain	2016	8156	4482;19351	17	4481	0_2_15_0_19_3_0_0_0_0_0
57119	NG38	Spain	2016	7827	4487;19357	219	3936	0_2_53_2_51_2_3_2_0_0_0
57122	NG41	Spain	2016	7363	71312	196	4488	0_0_52_1_1_0_0_0_26_0_0
57132	NG49	Spain	2016	8143	4499;19369;71318;82053;98401	62	4497;38651	0_0_26_3_7_0_0_1_0_0_0
57142	NG59	Spain	2016	8135	71323	425	4506	1_8_3_6_0_5_0_1_0_0_0
57153	NG70	Spain	2016	7827	4514;19385;26063	219	4512	0_2_53_2_13_0_0_4_0_0_0
57162	NG75	Spain	2016	7363	71329	196	4513;4517	0_0_52_1_1_0_0_0_20_0_0
57163	NG76	Spain	2016	13149	14811;26068;38629;45232;48719;56815;71330;91869	535	4518;32799	1_11_0_1_1_0_0_0_0_0_0
57165	NG78	Spain	2016	8156	4520;19391;38630	17	4519	0_2_15_0_19_26_0_2_0_0_0
57171	NG85	Spain	2016	1584	112285	41	4523	1_1_2_0_51_0_0_0_0_1_0
57174	NG88	Spain	2016	7359	4874;19396;80258	223	4525	1_8_6_0_6_2_0_0_0_0_0
57177	NG91	Spain	2016	1579	4528;19399;26071;38634;48722;71336	24	4528	0_0_43_1_0_32_0_1_0_0_0
57178	NG92	Spain	2016	7827	4529;19400	219	4529	0_2_53_2_13_0_0_1_2_0_0
60436	KNY_NGAMR/1	Kenya	2014	13613	12405;26074;48724;52293;53847;54087;71339;79353;91870;101679	485	4535;41641	11_0_2_1_0_0_0_0_0_0_0
60437	KNY_NGAMR9p	Kenya	2016	14300	4877;19405;26075;48725;50411;54088;71340;84430;91871	502	4536;25820	0_2_55_2_0_0_0_0_0_0_0
60442	KNY_NGAMR33	Kenya	2016	13764	112288	213	4538;31841	1_1_34_0_2_0_0_0_0_0_0	SRR7534689
60481	Ngiss3819	Italy	2017	1901	4321;19410;26079;38640;48730	3	4543	0_2_0_1_27_23_0_0_0_0_0
60483	Ngiss3835	Italy	2017	1902	4647;19412;26081;52298;56832;80260;91874	263	4545;32801	0_2_23_0_4_0_0_0_0_1_0
60485	Ngiss3854	Italy	2017	1583	71343	133	4547	0_2_9_9_5_0_0_0_0_0_0
60488	Ngiss3898	Italy	2017	1901	4329;19417;26085;48732	3	4549;4560	0_2_0_1_29_0_0_0_0_0_0
60489	Ngiss3899	Italy	2017	7363	4334;19418;26086	8	4550	0_2_17_0_9_20_0_0_0_0_0
60493	Ngiss3919	Italy	2017	7363	71344	196	4554	0_0_52_1_1_8_0_0_0_0_0
60494	Ngiss3926	Italy	2017	7363	4347;26090	8	4555	0_2_17_0_9_9_0_0_0_0_0
60500	Ngiss3965R	Italy	2017	1901	4354;19427;26095;48734;52303	3	4561	0_2_0_1_29_0_0_0_0_1_0
60501	KNY_NGAMR2	Kenya	2014	1928	71345;91878;101680	1086	4562;32805;41642	4_0_1_0_0_0_0_0_0_0_0
60503	KNY_NGAMR4	Kenya	2016	1588	71347;80263;91879;105129	503	4564;32806	0_0_36_0_0_0_0_0_0_0_0
60504	KNY_NGAMR5	Kenya	2015	1599	71348;85148;91880;109250	37	4565;26443;32807	0_0_47_10_0_0_0_0_0_0_0	SRR7534671
60505	KNY_NGAMR6	Kenya	2015	11367	4915;19432;26099;54089;56836;91881	502	4566;32808	0_2_55_0_1_0_0_0_0_0_0	SRR7534672
60506	KNY_NGAMR7	Kenya	2015	11366	4917;19433;26100;48738;50417;52305;54090;71349	501	4567	0_16_4_0_0_0_0_0_0_0_0
60510	KNY_NGAMR23	Kenya	2014	13780	4922;19436;38649;45234;48742;50421;56839;71353;79358;91884;98403	21	4571;32811;38653	0_0_33_55_0_0_0_0_0_0_0
60513	KNY_NGAMR17	Kenya	2016	1921	4923;19438;38651;50423;52306;71355;79360	501	4573	0_16_4_0_11_0_0_0_0_0_0
60514	KNY_NGAMR18	Kenya	2014	8133	71356;80264;101681	503	4574;41643	0_0_36_2_0_0_0_0_0_0_0
60516	KNY_NGAMR15	Kenya	2016	13782	4926;19441;48746;50425;71357;79361	21	4576	0_0_33_46_5_0_0_0_0_0_0
60522	KNY_NGAMR29	Kenya	2017	11750	112291	213	4579;25938;26702;32813	1_1_34_1_1_0_0_0_0_0_0	SRR7534706
60524	KNY_NGAMR32	Kenya	2017	13782	4931;19445;26108;38654;48751;50430;71360	21	4581	0_0_33_50_0_0_0_0_0_0_0	SRR7534701
60530	KNY_NGAMR53	Kenya	2018	11750	112292	213	4582	1_1_34_1_0_0_0_0_0_0_0	SRR7534681
61043	592911	Norway	2017	8156	4595;26111	17	4586	0_2_15_0_19_6_0_1_0_1_0	ERR3325900
61046	593231	Norway	2017	8156	4598;19448;26114;71365	17	4589	0_2_15_0_19_3_0_4_0_0_0	ERR3325909
61050	593245	Norway	2017	1599	71368	243	4593	1_1_17_6_1_9_3_0_0_1_0	ERR3325916
61051	593252	Norway	2017	1599	71369	243	3866;4594;26252	1_1_17_6_1_9_3_0_0_0_0	ERR3325919
61052	594354	Norway	2017	8156	4604;19454;26118	17	4595;4609	0_2_15_0_19_6_0_0_0_3_0	ERR3325942
61053	594368	Norway	2017	13415	4384;19455;26119;38875;56848	3	4596	0_2_0_4_18_0_0_0_1_0_0	ERR3325944
61059	598028	Norway	2017	7827	4659;19459;91889;98405	219	4601;32816	0_2_53_2_19_1_0_0_0_0_0	ERR3326008
61061	598593	Norway	2017	1597	4935;19461;26122;48757;90854;105133	548	4603;31843	0_0_18_24_0_0_0_0_0_0_0	ERR3326015
61062	598596	Norway	2017	1597	4936;19462;26123;48758;90855;105134	548	4603;31843	0_0_18_24_0_0_0_0_0_0_0	ERR3326016
61063	599347	Norway	2017	7827	4610;19463	219	4604;26253	0_2_53_2_13_8_0_0_0_0_0	ERR3326029
61064	599991	Norway	2017	9363	4385;48759	16	4605	0_2_1_0_74_22_0_0_0_0_0	ERR3326035
61065	600020	Norway	2017	7827	4612;19464;26124	219	4606	0_2_53_2_13_1_0_0_0_0_0	ERR3326041
61066	600022	Norway	2017	7827	4613;19465;26125	219	4607	0_2_53_2_13_1_0_0_0_1_0	ERR3326042
61067	601476	Norway	2017	1588	4938;26126;48760;80270;98406;109253	21	4608;38655	0_0_33_12_42_0_0_0_0_0_0	ERR3326059
61069	601955	Norway	2017	8156	4614;19466;26127	17	4609	0_2_15_0_19_6_0_0_0_3_0	ERR3326072
61070	603813	Norway	2017	8143	4615;19467;82057	62	4610	0_0_26_3_7_0_3_0_0_0_0	ERR3326095
61071	603942	Norway	2017	8143	4616;19468;82058	62	4610	0_0_26_3_7_0_3_0_0_0_0	ERR3326098
61077	610104	Norway	2017	8143	10260;19473;48762;71371	62	4616	0_0_26_6_6_0_0_0_0_1_0	ERR3326132
61337	999000103	Lithuania	1999	1601	4940;19484;26136;38879;48766;52312;80271;90857	426	4628;31845	0_0_0_1_0_0_0_0_0_0_0	ERR349955
61341	999000097	Turkey	1999	8112	71384;85149	1087	4630;26444	1_1_16_0_0_0_0_0_0_0_0	ERR349960
61346	KN13_116	Japan	2001	7363	4423;19489;85151	8	4633;26446	0_2_17_0_2_0_0_0_0_0_0	ERR363591
61353	IN_09_3875	India	2009	11191	4796;19490;26140;48770;71387;90858	124	4635;31846	0_18_7_0_0_0_0_0_0_0_0	ERR363634
61354	IN_09_3830	India	2009	8775	4941;19491;26141;54094;71388;109254	459	4636	0_20_0_0_0_0_0_0_0_0_0	ERR363635
61380	BEL_10_3	Belarus	2010	11177	4942;19492;26143;48771;52314;56851;71389	430	4638	45_0_0_0_3_1_0_0_0_0_0	ERR350042
61381	989000041	Philippines	1998	1583	10262;19493;48772;80272	389	4639	0_2_20_0_0_0_0_0_1_0_0	ERR352799
61622	GU008	Japan	2015	7363	4799;19496	290	4641	0_2_28_0_0_1_0_0_0_0_0	DRR117952
61623	GU027	Japan	2015	7363	4800;19497	290	4642	0_2_28_0_0_0_0_0_0_0_0	DRR117953
61624	GU033	Japan	2015	7363	4801;19498	290	4643	0_2_28_0_0_2_0_0_0_0_0	DRR117954
61625	GU040	Japan	2015	7363	4434;80274	8	4644	0_2_17_0_14_0_0_0_0_0_0	DRR117955
61626	GU067	Japan	2015	7363	4435;71392	8	4645	0_2_17_0_9_6_0_0_0_0_0	DRR117956
61627	GU075	Japan	2015	7363	4438;71393	8	4646	0_2_17_0_9_6_0_1_0_0_0	DRR117957
61630	GU155	Japan	2015	7363	4802;19501	290	4649	0_2_28_0_0_0_0_0_0_0_0	DRR117960
61635	DRR117965	Unknown		7363	4898	8	4654	0_2_17_1_0_0_0_0_0_0_0	DRR117965
61636	GU309	Japan	2015	7363	4806;19502	8	4655	0_2_17_1_0_0_0_0_0_2_0	DRR117966
61638	GU345	Japan	2015	7363	4462;26149;50435	8	4657	0_2_17_0_9_17_0_0_0_0_0	DRR117968
61643	GU422	Japan	2015	7363	4479;38882;48776;50436;56857	8	4662	0_2_17_0_29_0_0_0_0_0_0	DRR117973
61648	GU448	Japan	2015	7363	4486	8	4667	0_2_17_0_20_5_0_0_0_1_0	DRR117978
61650	GU478	Japan	2015	7363	4496;19510;26154	8	4669	0_2_17_0_9_3_0_3_0_1_0	DRR117980
61651	GU483	Japan	2015	7363	4814;19511	290	4670	0_2_28_0_0_0_0_0_1_0_0	DRR117981
61652	GU511	Japan	2015	7363	4497	8	4671	0_2_17_0_20_3_0_1_0_0_0	DRR117982
61653	GU512	Japan	2015	7363	4504;80276	8	4672	0_2_17_0_25_0_0_0_1_0_0	DRR117983
61656	GU549	Japan	2015	7363	4510;19513;26155	8	4675	0_2_17_0_9_3_0_3_0_0_0	DRR117986
61658	GU571	Japan	2015	7363	4817;19514	290	4677	0_2_28_0_0_3_0_0_0_0_0	DRR117988
61659	GU574	Japan	2015	7363	4523;19515;26156	8	4678	0_2_17_0_9_3_0_3_0_2_0	DRR117989
61660	GU577	Japan	2015	7363	4526	8	4679	0_2_17_0_20_3_0_0_0_0_0	DRR117990
61661	GU598	Japan	2015	7363	4532;26157	8	4680	0_2_17_0_9_7_0_0_0_0_0	DRR117991
61668	DRR124689	Unknown		7363	4551	8	939;4686;4687	0_2_17_0_12_0_0_0_0_0_0	DRR124689
61674	FC430	Japan	2015	7359	4944;19522;38884;52317;56861	223	4693	1_8_6_0_9_2_0_0_0_0_0	DRR124695
61690	FC446	Japan	2015	7363	4575;19525;48778	8	4703	0_2_17_0_9_18_0_0_0_0_0	DRR124711
61697	FC453	Japan	2015	1579	4882;19530;48779	3	4708	0_2_0_1_222_2_1_0_0_0_0	DRR124718
61703	FC459	Japan	2015	7359	9850;24361;48782;52318;56866;84431	223	4712;25821	1_8_6_0_3_0_0_0_0_0_0	DRR124724
61714	FC470	Japan	2015	7819	4583;19541;26174;38888;56869	8	4709;4722	0_2_17_0_45_0_0_0_0_0_0	DRR124735
61718	FC474	Japan	2015	7363	4585	8	4726	0_2_17_0_20_3_0_2_0_1_0	DRR124739
61719	FC475	Japan	2015	7363	4586;52320	8	4727	0_2_17_0_20_3_0_2_0_1_0	DRR124740
61724	FC480	Japan	2015	1579	4703;19547;52324	3	4732	0_2_0_1_223_0_1_0_0_0_0	DRR124745
61731	FC487	Japan	2015	13839	4591;26177;38892;80280	8	4736	0_2_17_0_45_1_0_0_0_0_0	DRR124752
61734	FC490	Japan	2015	13842	71399	1066	4739	0_0_52_0_1_1_0_0_0_1_0	DRR124755
61736	FC492	Japan	2015	7363	4617	8	4740	0_2_17_0_20_4_0_0_1_0_0	DRR124757
61746	FC502	Japan	2015	1579	4883;19559;48792;71403;90866	3	4747;31854	0_2_0_1_229_0_1_0_0_0_0	DRR124767
61749	FC505	Japan	2015	1932	4626;19561;71404	8	4750	0_2_17_0_22_0_0_0_0_0_0	DRR124770
61756	FC512	Japan	2015	7363	4635	8	4757	0_2_17_0_20_4_0_0_0_0_0	DRR124777
61759	FC515	Japan	2015	13841	9851;26185;48795;52326;56875;71406;85167;101235	208			DRR124780
61761	FC517	Japan	2015	7827	4637;19568	290	4759	0_2_28_0_2_0_0_0_0_1_0	DRR124782
61762	FC518	Japan	2015	7827	4841;19569	290	4760	0_2_28_0_2_0_0_0_0_0_0	DRR124783
61771	FC527	Japan	2015	7827	4844;19575;52328;91897	290	4766;32823	0_2_28_0_1_0_0_0_0_0_0	DRR124792
61779	FC535	Japan	2015	13842	71409	1066	4772	0_0_52_0_1_1_0_0_0_0_0	DRR124800
61780	FC536	Japan	2015	13842	71410	1066	4773	0_0_52_0_1_1_0_0_0_0_0	DRR124801
61782	FC538	Japan	2015	13840	71412	3	4775	0_2_0_13_1_3_2_0_0_1_0	DRR124803
61784	FC540	Japan	2015	7363	4661;26192;52332;82060;90870;91899;101685	8	4777;31858;32825;41646	0_2_17_0_9_8_0_0_0_0_0	DRR124805
61789	HI55	Japan	2015	7358	9017;48805;52334;54095;56881;85169;90871;101238	208			DRR124810
61790	HI56	Japan	2015	7360	4848;19587;52335	3	4780	0_2_0_1_189_0_0_0_0_1_0	DRR124811
61805	IT77	Japan	2015	13840	71417	3	4794	0_2_0_13_1_3_1_0_0_0_0	DRR124826
61806	KM247	Japan	2015	1901	4672;19598	3	4795	0_2_0_1_0_18_2_0_0_0_0	DRR124827
61823	KM264	Japan	2015	7360	71421	3	4807	0_2_0_13_0_1_0_0_0_0_0	DRR124844
61824	KM265	Japan	2015	7363	4681;26205;71422	8	4808	0_2_17_0_9_3_0_1_0_0_0	DRR124845
61831	KM272	Japan	2015	7358	10819;52337;54096;56889;85170;90875;101240	208	26050;31861;41259	0_2_36_0_3_0_0_0_0_0_0	DRR124852
61844	KM285	Japan	2015	7819	4688;26211;71425;109267	8	4824	0_2_17_0_42_0_0_1_0_0_0	DRR124865
61846	KM287	Japan	2015	7359	4964;19616;56892	223	4826	1_8_6_0_2_23_0_0_0_0_0	DRR124867
61859	KM300	Japan	2015	7363	4696;19623;26216	8	4837	0_2_17_0_9_3_0_2_0_0_0	DRR124880
61861	KM303	Japan	2015	1901	4701;19625;48827;56895	3	4763;4839	0_2_0_1_0_31_0_0_0_0_0	DRR124882
61863	KM305	Japan	2015	13843	4706;19627;48829;101687	3	4841	0_2_0_1_0_18_7_0_0_0_0	DRR124884
61873	08-040	Japan	1996	7363	4742;19632	8	4847	0_2_17_0_0_24_0_0_0_0_0	DRR129083
61879	98-055	Japan	1997	1901	4747;19634;48835	3	4852	0_2_0_1_44_3_0_0_0_0_0	DRR129089
61888	12-015	Japan	2000	1901	4721;19641	3	4858;4859	0_2_0_1_59_0_0_0_0_0_0	DRR129098
62968	WHO F	Canada	1991	10934	1090;17134;19643;24305;26221;52135;52342;54043;54097;80145;80284;85175;88583	441	328;551;1053;3365;3471;4864;26287;26461;29650;29651;29655;32749;32750	34_0_0_0_0_0_0_0_0_0_0	ERR1447929
63673	M17 240486	UK		1594	5296;19694;26293;38903;48842;80294;91929	414	4960;32852	1_8_5_0_65_3_0_0_0_0_0	ERR3900348
70791	p1173	Spain		7823	71506	133	4966	0_2_9_3_1_0_0_1_0_0_0
70797	P1986	Spain		7823	71511	133	4972	0_2_9_3_3_0_0_0_0_3_0
70803	P2228	Spain		7823	71515	133	4976	0_2_9_3_3_0_0_0_0_2_0
74373	HUSE24	Spain	2018	9363	6494;19746;26941	16	5017	0_2_1_0_73_54_3_0_0_0_0	SRR15369149
74377	HUSE39	Spain	2018	9363	6499;19750;26944;41040;56979	16	5021	0_2_1_0_73_74_0_0_0_0_0	SRR15369105
74378	HUSE40	Spain	2018	7363	6502;19751;38922;52382	8	5022;5136;5153	0_2_17_0_9_0_3_3_1_0_0	SRR15369095
74381	HUSE66	Spain	2018	1901	9018;26945;38924;48860;80298	3	5025	0_2_0_1_182_0_0_0_0_3_0	SRR15369092
74386	HUSE116	Spain	2018	1901	6519;19758;26949;38929;48863;56983	3	5026;5030	0_2_0_1_182_0_0_0_0_0_0	SRR15369144
74387	HUSE118	Spain	2018	9363	6521;19759;26950;38930	16	5031	0_2_1_0_73_112_0_0_0_0_3	SRR15369143
74388	HUSE126	Spain	2018	9363	6524;19760;26349	16	5032	0_2_1_0_73_58_1_0_0_1_0	SRR15369142
74393	HUSE139	Spain	2018	9363	6531;19765;26955;38935	16	5036	0_2_1_0_73_112_0_0_0_1_0	SRR15369136
74398	HUSE146	Spain	2018	1901	6541;19770;26959;38940;48865;56985	3	5039;5040;5041	0_2_0_1_182_0_0_0_0_2_0	SRR15369131
74399	HUSE148	Spain	2018	1901	6542;19771;26960;38941;48866;80299	3	5041	0_2_0_1_182_0_0_0_0_2_0	SRR15369130
74406	HUSE213	Spain	2019	1901	6560;19778;26966;38947;48870;56988	3	5024;5025;5046	0_2_0_1_182_0_0_0_0_3_0	SRR15369122
74407	HUSE224	Spain	2019	9363	6561;19779;26967;38948;52384	16	5047	0_2_1_0_73_112_0_0_0_0_1	SRR15369121
74417	HUSE299	Spain	2019	9363	6608;19789;26976	16	5054;5055	0_2_1_0_73_58_0_0_0_6_0	SRR15369110
74418	HUSE302	Spain	2019	11428	6614;19790;26977;56993;105193	16	5056;44433	0_2_1_0_189_0_0_0_0_1_0	SRR15369109
74421	HUSE309	Spain	2019	7822	6636;19793;26979	3	5058	0_2_0_4_31_0_0_0_0_0_0	SRR15369106
74435	RYC7	Spain	2018	9363	6679;19807;26992;38966	16	5067	0_2_1_0_73_112_0_0_0_0_0	SRR15412791
74445	RYC25	Spain	2018	1583	71551	133	5077	0_2_9_9_10_0_0_0_0_0_0	SRR15412819
74448	RYC28	Spain	2018	9363	6699;19820;48883	16	5080	0_2_1_0_73_58_3_0_0_0_0	SRR15412816
74449	RYC29	Spain	2018	8135	71552;105196	425	5081;44435	1_8_3_6_6_0_0_0_0_0_0	SRR15412815
74457	RYC39	Spain	2019	1583	71554	133	5088	0_2_9_9_2_0_0_0_0_0_0	SRR15412806
74466	RYC49	Spain	2019	8143	5313;19838;27011;38978;48885	62	5097	0_0_26_3_33_0_0_0_0_0_0	SRR15412796
74469	RYC58	Spain	2019	1583	71560;105197	133	5100	0_2_9_9_0_2_0_0_0_0_0	SRR15412793
74472	RYC61	Spain	2019	9363	6867;19844;38983;48886;57004	16	5103	0_2_1_0_74_23_0_0_0_0_0	SRR15412789
74476	RYC66	Spain	2019	8156	6870;19847;71563;101243	17	5106;41261	0_2_15_0_19_3_2_0_0_0_0	SRR15412785
74478	RYC68	Spain	2019	11864	71565	16	5108	0_2_1_1_8_5_0_0_0_0_0	SRR15412783
74482	HVH31	Spain	2018	7363	6874;19852;27018;82067;100078	8	5111;40240	0_2_17_0_9_11_0_0_0_0_0	SRR15441640
74485	HVH66	Spain	2018	1599	71567	243	5113	1_1_17_6_1_9_2_0_1_0_0	SRR15441607
74488	HVH108	Spain	2018	1596	71569;85186;105200	450	5116;26469;44437	1_12_0_0_10_0_0_0_0_0_0	SRR15441591
74492	HVH178	Spain	2018	15242	6883;19862;26355;38987;98446	243	5120	1_1_17_6_23_0_0_0_0_0_0	SRR15441648
74502	HVH377	Spain	2018	7822	6892;19872;57010	3	5130	0_2_0_4_20_4_0_0_0_1_0	SRR15441637
74503	HVH388	Spain	2018	7359	5330;19873;27028;38993;57011	223	5131	1_8_6_0_2_0_18_0_1_1_0	SRR15441636
74519	HVH680	Spain	2019	7359	5334;27039;39000;80308	223	5146	1_8_6_0_2_0_18_0_1_0_0	SRR15441619
74520	HVH682	Spain	2019	7359	5335;19887;39001;48896;57016	223	5147	1_8_6_0_2_0_18_0_0_0_0	SRR15441617
74521	HVH683	Spain	2019	1901	6907;19888;90884	3	5112;5144;31869;31870	0_2_0_1_0_84_0_0_0_0_0	SRR15441616
74524	HVH723	Spain	2019	7363	6910;19891;27042;39004;71573	8	5150	0_2_17_0_9_12_1_0_0_0_0	SRR15441613
74526	HVH738	Spain	2019	7363	6912;19893;80309	8	5152	0_2_17_0_9_0_3_4_0_0_0	SRR15441611
74527	HVH752	Spain	2019	7363	6913;19894;39006;52390	8	5153	0_2_17_0_9_0_3_3_1_0_0	SRR15441610
74529	HVH832	Spain	2019	1583	71575;85192	133	5155;26474	0_2_9_9_8_0_0_0_0_1_0	SRR15441608
74531	HVH876	Spain	2019	7827	6915;19898;80310	219	5157	0_2_53_2_13_0_3_0_0_0_0	SRR15441605
74735	MCS-79985	Ireland	2017	1580	6926;19910;27053;39013;48898;82068	16	5169	0_2_1_0_25_0_0_0_0_0_0	ERR4198170
75579	NG290	Thailand	2011	1903	71579;85195	37	5171;26476	0_0_47_5_4_0_0_0_0_0_0	SRR10350531
75584	FQ35	USA	2014	13149	14815;27056;46337;48903;71583;79376;85197;90886;105205	535			SRR8457070
75587	FQ82	USA	2014	7363	5358;19916;80313;85198	196	5177;26477	0_0_52_1_1_19_0_2_0_4_0	SRR8457067
75588	FQ84	USA	2013	7363	5361;19917;80314	196	5178	0_0_52_1_1_19_0_2_0_3_0	SRR8457066
75910	NG_AMS0002	The Netherlands	2014	11990	5362;19918	414	5179	1_8_5_0_52_24_0_0_0_0_0
75913	NG_AMS0006	The Netherlands	2014	7363	71585	196	5182	0_0_52_1_1_0_0_0_10_0_0
75915	NG_AMS0008	The Netherlands	2014	11990	5366;19923;105206	414	5184	1_8_5_0_52_24_0_1_0_0_0
75928	NG_AMS0021	The Netherlands	2014	1600	7592;19934;57022	151	5188;5190	0_2_48_1_8_0_1_0_0_0_0
75929	NG_AMS0022	The Netherlands	2014	8163	5369;19935;71590	439	5197	5_2_0_1_19_0_0_0_0_0_0
75931	NG_AMS0024	The Netherlands	2014	1584	112313	41	5199	1_1_2_12_2_0_0_1_0_0_0
75939	NG_AMS0032	The Netherlands	2014	1901	6975;19945	3	5207	0_2_0_1_0_91_0_0_0_0_0
75946	NG_AMS0039	The Netherlands	2014	9363	6982;19952	16	5214	0_2_1_0_73_40_0_1_0_0_0
75952	NG_AMS0045	The Netherlands	2014	9362	10297;19958	16	5220	0_2_1_0_183_1_0_0_0_0_0
75955	NG_AMS0048	The Netherlands	2014	11990	5394;19961	414	5223	1_8_5_0_52_24_2_0_0_0_0
75957	NG_AMS0050	The Netherlands	2014	6720	7657;19963;54098;71597	359	5225	1_1_6_0_0_0_0_0_0_0_0
75961	NG_AMS0054	The Netherlands	2015	7822	6995;19967	133	5229	0_2_9_14_6_0_0_2_0_0_0
75966	NG_AMS0059	The Netherlands	2015	7363	71602	196	5234;5237	0_0_52_1_1_0_0_1_4_1_0
75967	NG_AMS0060	The Netherlands	2015	1584	112316	41	5235	1_1_2_0_15_2_0_0_0_0_0
75973	NG_AMS0066	The Netherlands	2015	7363	71605	196	5241	0_0_52_1_1_0_0_1_5_0_0
75974	NG_AMS0067	The Netherlands	2015	7827	7008;19980	219	5242	0_2_53_2_51_0_0_1_0_2_0
75982	NG_AMS0075	The Netherlands	2015	7363	71609	196	5250	0_0_52_1_1_0_6_1_0_0_0
75987	NG_AMS0080	The Netherlands	2015	11428	7021;19993	16	5236	0_2_1_0_185_0_0_0_1_1_0
75988	NG_AMS0081	The Netherlands	2015	11251	71610;105208	549	5255	0_0_42_0_1_0_0_0_0_0_0
75989	NG_AMS0082	The Netherlands	2015	1599	71611	243	5256	1_1_17_6_13_1_0_0_0_0_0
75993	NG_AMS0086	The Netherlands	2015	7827	7025;19999;52397	219	5260	0_2_53_2_13_5_0_1_0_0_0
75994	NG_AMS0087	The Netherlands	2016	13143	7026;20000	219	5261	0_2_53_2_51_3_0_0_0_0_0
75997	NG_AMS0090	The Netherlands	2016	7363	71613	196	5264	0_0_52_1_1_0_14_0_0_0_0
75998	NG_AMS0091	The Netherlands	2016	1579	7030;20004;27060	24	5265	0_0_43_1_0_22_2_0_0_0_0
76001	NG_AMS0094	The Netherlands	2016	8156	7033;20007	17	5268	0_2_15_0_22_0_0_0_0_0_0
76007	NG_AMS0100	The Netherlands	2016	1599	71616	243	5274	1_1_17_6_17_0_0_0_0_0_0
76009	NG_AMS0102	The Netherlands	2016	8156	7040;20015	17	5276	0_2_15_0_19_0_0_0_0_5_0
76011	NG_AMS0104	The Netherlands	2016	8156	7042;20017	17	5278	0_2_15_0_35_0_0_0_0_0_0
76013	NG_AMS0106	The Netherlands	2016	1599	71620	243	5280	1_1_17_6_13_2_0_0_0_0_0
76015	NG_AMS0108	The Netherlands	2016	9363	7046;20021	16	5282	0_2_1_0_73_64_0_1_0_0_0
76017	NG_AMS0110	The Netherlands	2016	8156	7048;20023;71622	17	5284	0_2_15_0_42_0_0_0_0_0_0
76019	NG_AMS0112	The Netherlands	2016	9363	7050;20025	16	5286	0_2_1_0_95_0_0_0_0_0_0
76021	NG_AMS0114	The Netherlands	2016	1901	7052;20027;27062	3	5288	0_2_0_1_225_1_0_0_0_0_0
76025	NG_AMS0118	The Netherlands	2016	11431	5433;20031;52398	545	5292	0_0_40_0_1_0_0_0_0_0_0
76033	NG_AMS0126	The Netherlands	2016	7827	7062;20039	219	5300	0_2_53_2_13_2_0_0_0_0_0
76035	NG_AMS0128	The Netherlands	2016	7827	7064;20041	219	5298;5301	0_2_53_2_51_14_0_0_0_0_0
76036	NG_AMS0129	The Netherlands	2017	1599	71628	243	5302	1_1_17_6_1_9_2_0_0_0_0
76038	NG_AMS0131	The Netherlands	2017	15572	7659;20044;57027;71630;85199;105210	360	5304	20_0_1_0_0_0_0_0_0_0_0
76046	NG_AMS0139	The Netherlands	2017	1599	71633	243	5312	1_1_17_6_13_0_0_0_0_2_0
76052	NG_AMS0145	The Netherlands	2017	7827	7078;20058	219	5318	0_2_53_2_13_0_0_1_0_1_0
76055	NG_AMS0148	The Netherlands	2017	7827	7080;20060	219	5318	0_2_53_2_13_0_0_1_0_1_0
76056	NG_AMS0149	The Netherlands	2017	8135	71635	425	5321	1_8_3_6_1_4_0_0_0_0_0
76063	NG_AMS0160	The Netherlands	2017	7359	5453;20068;80318	223	5328	1_8_6_0_2_0_20_0_0_0_0
76067	NG_AMS0164	The Netherlands	2018	7822	7088;20072;71638	133	5332	0_2_9_14_16_0_0_0_0_0_0
76070	NG_AMS0169	The Netherlands	2018	8156	7091;20075	17	5335	0_2_15_0_19_3_0_1_0_0_0
76072	NG_AMS0172	The Netherlands	2018	1585	112317	44	5337	1_1_22_0_2_0_0_0_0_0_0
76080	NG_AMS0182	The Netherlands	2018	8156	7097;20085	17	5345	0_2_15_0_34_0_0_0_0_0_0
76086	NG_AMS0192	The Netherlands	2018	7827	7101;20090	219	5351	0_2_53_2_18_0_0_0_0_0_0
76087	NG_AMS0193	The Netherlands	2018	8156	7102;20091	17	5352	0_2_15_0_19_6_2_0_0_0_0
76093	NG_AMS0200	The Netherlands	2018	8156	7107;20097	17	5358	0_2_15_0_32_0_0_0_0_0_0
76101	NG_AMS0209	The Netherlands	2018	1583	71655	133	5363	0_2_9_9_4_0_1_0_0_0_0
76110	NG_AMS0219	The Netherlands	2018	8156	7119;20114;105213	17	5373	0_2_15_0_23_0_0_0_0_0_0
76113	NG_AMS0223	The Netherlands	2018	7827	7122;20117	219	5376	0_2_53_2_13_6_0_0_0_2_0
76115	NG_AMS0225	The Netherlands	2018	7827	7124;20119	219	5378	0_2_53_2_13_0_0_2_0_0_0
76116	NG_AMS0226	The Netherlands	2018	7827	7125;20120	219	5379	0_2_53_2_13_0_0_2_1_0_0
76117	NG_AMS0227	The Netherlands	2018	1583	71657	133	5380	0_2_9_9_0_0_0_0_0_0_0
76119	NG_AMS0229	The Netherlands	2018	13292	71658	16	5382	0_2_1_1_11_0_0_0_0_0_0
76121	NG_AMS0231	The Netherlands	2018	1583	71659	133	5384;9194	0_2_9_9_0_0_0_0_0_1_0
76125	NG_AMS0236	The Netherlands	2018	8156	7131;20129	17	5388	0_2_15_0_25_0_0_0_0_0_0
76128	NG_AMS0240	The Netherlands	2018	11208	12436	368	5391	0_0_26_15_0_0_0_0_0_0_0
76133	NG_AMS0246	The Netherlands	2019	7822	7136;20136;27068	3	5396	0_2_0_4_9_0_0_0_0_0_0
76137	NG_AMS0252	The Netherlands	2019	11428	7140;20140	16	5400	0_2_1_0_185_2_0_0_0_0_0
76140	NG_AMS0257	The Netherlands	2019	7363	71670	196	5403	0_0_52_1_17_0_0_0_0_0_0
76141	NG_AMS0259	The Netherlands	2019	15574	112318	1092	5404	1_1_28_0_0_0_0_0_0_0_0
76146	NG_AMS0268	The Netherlands	2019	15575	7147;20149;105215	18	5409	0_0_12_2_3_32_0_0_0_0_0
76149	NG_AMS0273	The Netherlands	2019	1583	71673	133	5412	0_2_9_9_0_0_0_2_0_0_0
76157	NG_AMS0283	The Netherlands	2019	9903	112319	41	5420	1_1_2_21_0_0_0_0_0_0_0
76163	NG_AMS0292	The Netherlands	2019	7827	7158;20164	219	5426	0_2_53_2_18_0_0_1_0_0_0
76169	NG_AMS0298	The Netherlands	2019	10314	7162;20170	3	5432	0_2_0_4_14_8_0_0_0_0_0
76180	NG_AMS0309	The Netherlands	2019	11990	71685;101702	414	5443;41659	1_8_5_0_52_20_0_0_0_0_0
76194	NG_AMS0156	The Netherlands	2017	7827	7178;20191	219	5454	0_2_53_2_13_8_0_0_0_3_0
76196	NG_AMS0165	The Netherlands	2018	1901	7180;20193	3	5456	0_2_0_1_0_85_3_0_0_0_0
76208	NG_AMS0220	The Netherlands	2018	7827	7192;20205	219	5467	0_2_53_2_13_6_0_0_0_0_0
76210	NG_AMS0238	The Netherlands	2018	7827	7194;20206	219	5469	0_2_53_2_13_0_0_2_2_0_0
76211	NG_AMS0244	The Netherlands	2018	7827	7195;20207	219	5470	0_2_53_2_13_0_0_5_0_0_0
76213	NG_AMS0248	The Netherlands	2019	7827	7197;20209	219	5472	0_2_53_2_13_0_1_0_0_0_0
76216	NG_AMS0258	The Netherlands	2019	7827	5594	219	5475	0_2_53_2_13_16_0_0_0_2_0
76217	NG_AMS0260	The Netherlands	2019	7827	7201;20211	219	5476	0_2_53_2_13_0_0_2_2_1_0
76219	NG_AMS0264	The Netherlands	2019	7827	7203;20212	219	5478	0_2_53_2_13_6_0_0_1_0_0
76223	NG_AMS0277	The Netherlands	2019	7827	7205;20214	219	5480	0_2_53_2_13_0_0_2_1_1_0
76229	NG_AMS0320	The Netherlands	2010	1901	7210;20219	3	5486	0_2_0_1_0_0_0_17_2_0_0
76237	NG_AMS0330	The Netherlands	2010	1901	7218;20225	3	5494	0_2_0_1_27_18_0_0_0_0_0
76245	NG_AMS0340	The Netherlands	2012	7363	71690	196	5502	0_0_52_1_1_0_0_0_15_0_0
76249	NG_AMS0344	The Netherlands	2013	1579	7230;20236;27075	24	5506	0_0_43_1_0_22_7_0_0_0_0
76252	NG_AMS0347	The Netherlands	2013	1579	7233;20239;27076	24	5509	0_0_43_1_0_18_0_3_0_0_0
76254	NG_AMS0349	The Netherlands	2013	7363	71692	196	5511	0_0_52_1_1_0_0_1_1_0_0
76259	NG_AMS0354	The Netherlands	2013	7360	7240;20245;52403	3	5516	0_2_0_1_14_3_0_0_0_0_0
76262	NG_AMS0357	The Netherlands	2013	7363	71697	196	5518;8355	0_0_52_1_1_0_0_0_25_0_0
76278	NG_AMS0375	The Netherlands	2014	1579	7258;20263;27081	24	5534	0_0_43_1_0_22_1_0_1_1_0
76281	NG_AMS0378	The Netherlands	2015	7363	71708	196	5537	0_0_52_1_1_10_0_0_0_0_0
76290	NG_AMS0361	The Netherlands	2013	7363	71711	196	5545	0_0_52_1_1_0_9_0_0_3_0
76298	565172	Norway	2017	9363	7274;20279;48905	16	5549	0_2_1_0_74_0_0_0_2_0_0	ERR3325617
76302	577128	Norway	2017		7277;48908	16	5552	0_2_1_0_74_0_0_0_0_3_0	ERR3325783
76307	578299	Norway	2017	1599	71717	243	5555	1_1_17_6_1_9_2_0_3_0_0	ERR3325810
76311	579036	Norway	2017	8776	8947;20284;27087;39033;48912;57041;71719;79380;91934	236	5559;32857	0_18_1_12_0_0_0_0_0_0_0	ERR3325818
76317	591740	Norway	2017	8156	7285;20286;27089	17	5563	0_2_15_0_19_6_0_0_0_6_0	ERR3325864
76320	592485	Norway	2017	8156	7287;27090	17	5565	0_2_15_0_19_6_0_0_0_4_0	ERR3325882
76323	592584	Norway	2017	7363	10315;20289;27092;39034;48916;71721;85203	239	5568;26480	0_7_0_8_1_0_0_0_0_0_0	ERR3325885
76329	592624	Norway	2017	8156	7293;20291;27095;57045	17	5573	0_2_15_0_19_9_0_0_0_0_0	ERR3325891
76330	592626	Norway	2017	1596	5677;20292;27096;39036;71722	450	5574	1_12_0_0_2_1_0_0_0_5_0	ERR3325892
76333	592898	Norway	2017	10622	112320	41	5577	1_1_2_6_0_0_0_0_0_1_0	ERR3325896
76336	592913	Norway	2017	7827	7300;20298	219	5580	0_2_53_2_13_0_0_1_3_3_0	ERR3325901
76348	593686	Norway	2017	13415	7306;20303;27102;39038;80330	3	5589	0_2_0_4_18_0_0_0_1_2_0	ERR3325921
76350	593763	Norway	2017	8156	7307;20304	17	5590	0_2_15_0_19_11_0_0_1_0_0	ERR3325923
76364	594132	Norway	2017	10314	7316;20314;27108	3	5602	0_2_0_4_12_3_0_0_1_0_0	ERR3325937
76371	594498	Norway	2017	11428	7322;20319;46340;57055	16	5609	0_2_1_0_185_3_0_0_2_0_0	ERR3325947
76381	595329	Norway	2017	7827	7327;20323;27114	219	5616	0_2_53_2_13_0_4_0_0_0_0	ERR3325958
76386	595640	Norway	2017	1893	71738	31	5620	0_2_29_2_3_3_0_0_1_1_0	ERR3325963
76392	595720	Norway	2017	13415	8575;27120;39045;57059	3	5625	0_2_0_4_18_0_0_0_1_1_0	ERR3325971
76398	595947	Norway	2017	8156	8576;27123	17	5631	0_2_15_0_19_11_0_0_3_0_0	ERR3325977
76404	596222	Norway	2017	1599	71743	243	5636	1_1_17_6_1_9_2_0_2_0_0	ERR3325983
76407	596543	Norway	2017	13484	71745;105226	516	5638;44443	0_18_13_0_0_7_0_0_0_0_0	ERR3325986
76411	596551	Norway	2017	8776	71746;91939	1093	5640;32861	0_18_2_0_0_0_0_0_0_0_0	ERR3325990
76427	598207	Norway	2017	7359	5696;20345;27131;39054;57063	223	5646	1_8_6_0_2_0_15_0_0_1_0	ERR3326012
76428	598234	Norway	2017	1599	71747	243	5647	1_1_17_6_1_9_2_0_4_0_0	ERR3326013
76441	599349	Norway	2017	8156	7354;20351;27134	17	5655	0_2_15_0_19_6_0_0_1_0_0	ERR3326030
76446	600006	Norway	2017	11516	71751	516	5659	0_18_13_0_12_0_0_0_0_0_0	ERR3326037
76455	600507	Norway	2017	1600	5722;20361	533	5666	0_0_46_1_2_0_0_0_0_0_0	ERR3326048
76456	600737	Norway	2017	8143	7365;20362;52414;82081	62	5667	0_0_26_3_7_5_0_0_0_0_0	ERR3326049
76465	601489	Norway	2017	10314	8950;20367;27141;57070;85212	3	5673;26488	0_2_0_4_12_4_0_0_0_0_0	ERR3326062
76486	603446	Norway	2017	11516	71757	516	5677	0_18_13_0_12_0_0_0_0_1_0	ERR3326090
76490	603932	Norway	2017	7822	7374;20372;27145;39059;105232	133	5679;44447	0_2_9_14_11_5_0_0_0_0_0	ERR3326096
76491	603939	Norway	2017	7363	71758;80338;81853;105233	196	5680	0_0_52_1_1_0_0_8_0_0_0	ERR3326097
76493	604161	Norway	2017	8156	7377;20375	17	5682	0_2_15_0_19_11_1_0_0_0_0	ERR3326100
76496	605009	Norway	2017	1599	71759	243	5685	1_1_17_6_1_9_4_0_0_1_0	ERR3326105
76505	605764	Norway	2017	7827	7389;20387;27148;98456	219	5694;38691	0_2_53_2_51_5_0_0_0_0_0	ERR3326115
76511	609602	Norway	2017	8776	7683;20392;27150;39062;48958;52417;53849;100085	354	5700;40245	0_18_0_0_0_0_0_0_0_0_0	ERR3326123
76515	610100	Norway	2017	8156	7394;20394;27151	17	5703	0_2_15_0_19_6_0_0_0_8_0	ERR3326130
76519	610347	Norway	2017	8156	7398;20398;27155	17	5707	0_2_15_0_19_6_0_0_0_9_0	ERR3326137
77393	590792	Norway	2017	10314	7601;20405;27160	3	5715	0_2_0_4_12_3_0_0_0_0_0	ERR3325846
77399	601701	Norway	2017	1901	7605;27163	3	5719	0_2_0_1_0_59_0_0_0_0_0	ERR3326066
77404	605007	Norway	2017	9363	7606;20409;41044;98457	16	5720;38692	0_2_1_0_73_58_0_0_0_7_0	ERR3326104
77406	607589	Norway	2017	1892	71771;100086;105236	425	5722;7095;40246;40346	1_8_3_0_11_0_0_0_0_0_0	ERR3326119
78331	AU2012-161	Australia	2012	7359	5818;20461;57088	223	5776	1_8_6_0_2_0_0_0_0_1_0	SRR5801863
78337	AU2012-237	Australia	2012	7359	5855;20467;57093	223	5782	1_8_6_0_2_0_0_0_0_1_0	SRR5801879
78344	AU2012-319	Australia	2012	7359	5884;20474;57099	223	5789	1_8_6_0_2_0_0_0_0_10_0	SRR5801893
78347	AU2012-329	Australia	2012	7359	5902;20477;27200;57102	223	5792	1_8_6_0_2_0_0_0_0_1_0	SRR5801895
78349	AU2012-332	Australia	2012	7359	5906;20479;27201;57103	223	5794	1_8_6_0_2_0_0_0_0_10_0	SRR5801871
78351	AU2012-338	Australia	2012	7359	5920;20481;57105	223	5796	1_8_6_0_2_0_0_0_0_1_0	SRR5801882
78352	AU2012-340	Australia	2012	7359	5933;20482;57106	223	5797	1_8_6_0_2_0_0_0_0_10_0	SRR5801890
78353	AU2012-341	Australia	2012	7359	5940;20483;57107;91952	223	5798	1_8_6_0_2_0_0_0_0_8_0	SRR5801869
78355	AU2012-417	Australia	2012	7359	5943;20485;57108	223	5800	1_8_6_0_2_0_0_0_0_2_0	SRR5801891
78363	AU2012-510	Australia	2012	7359	5990;20493;27205;57115	223	5808	1_8_6_0_2_0_0_0_0_1_0	SRR5801809
78364	AU2012-511	Australia	2012	7359	5991;20494;48968;57116	223	5809	1_8_6_0_2_0_0_0_0_40_0	SRR5801813
78365	AU2012-57	Australia	2012	7359	5993;20495;57117	223	5810	1_8_6_0_2_0_0_0_0_8_0	SRR5801846
78368	AU2012-574	Australia	2012	7359	6000;20498;48970;57119	223	5813	1_8_6_0_2_0_0_0_0_39_0	SRR5801812
78369	AU2012-60	Australia	2012	7359	6003;20499;27207;57120	223	5814	1_8_6_0_2_0_0_0_0_1_0	SRR5801884
78370	AU2012-61	Australia	2012	7359	6004;20500;57121	223	5775;5780;5782;5784;5792;5799;5815;5821;5828;5832	1_8_6_0_2_0_0_0_0_1_0	SRR5801850
78378	AU2012-698	Australia	2012	7359	6017;20507;80346	223	5822	1_8_6_0_2_0_0_0_0_10_0	SRR5801894
78379	AU2012-70	Australia	2012	7359	9629;20508;57126	223	5823	1_8_6_0_2_0_0_0_0_22_0	SRR5801849
78384	AU2012-75	Australia	2012	7359	6025;20512;80347	223	5828	1_8_6_0_2_0_0_0_0_1_0	SRR5801844
78388	AU2012-807	Australia	2012	7359	6041;20516;27212;57133	223	5832	1_8_6_0_2_0_0_0_0_1_0	SRR5801804
78391	AU2014-580	Australia	2014	7359	6051;20519;57135	223	5835	1_8_6_0_2_0_0_0_0_15_0	SRR5801822
78399	AU2014-606	Australia	2014	7359	6088;20527;27216;57142;71801	223	5843	1_8_6_0_2_0_0_0_0_43_0	SRR5801830
78406	AU2014-635	Australia	2014	7359	6099;20534;57148;100105	223	5850;40260	1_8_6_0_2_0_0_0_0_29_0	SRR5801856
78408	AU2014-645	Australia	2014	7359	9630;20536;80351	223	5852	1_8_6_0_2_0_0_0_0_20_0	SRR5801860
78410	AU2014-651	Australia	2014	7359	6118;20538;27217;57151;91953	223	5854	1_8_6_0_2_0_0_0_0_20_0	SRR5801841
78413	AU2014-661	Australia	2014	7359	6121;20541;80352	223	5857	1_8_6_0_2_0_0_0_0_42_0	SRR5801838
78416	AU2014-680	Australia	2014	7359	6125;20544;57155	223	5860	1_8_6_0_2_0_0_0_0_32_0	SRR5801835
78420	AU2014-690	Australia	2014	7359	6131;20548;80354;100107	223	5864;40262	1_8_6_0_2_0_0_0_0_29_0	SRR5801872
78422	AU2014-694	Australia	2014	7359	6140;20550;39090;57160	223	5866	1_8_6_0_2_0_0_0_0_26_0	SRR5801874
78440	H162760219	UK [Scotland]	2014	1580	7820;20564;27236;39101	16	5882	0_2_1_0_1_23_1_0_0_0_0	ERR2172284
78448	H161640178	UK [Northern Ireland]	2016	1580	7826;20571;27243;39107	16	5889	0_2_1_0_1_23_0_0_0_1_0	ERR2172302
78454	H162760215	UK [Scotland]	2014	1580	7831;20576;27248;39111	16	5895	0_2_1_0_1_23_1_0_0_3_0	ERR2172311
78463	H161240198	UK [England]	2016	1580	7837;20583;27254;39116	16	5903	0_2_1_0_1_23_1_0_0_11_0	ERR2172332
78471	H162760212	UK [Scotland]	2014	1580	7842;20588;27259;39119	16	5910	0_2_1_0_1_23_1_0_0_2_0	ERR2172345
78472	H162760216	UK [Scotland]	2014	1580	7843;20589;27260;39120	16	5911	0_2_1_0_1_23_1_0_0_4_0	ERR2172346
78473	H161240200	UK [England]	2016	1580	7844;20590;27261;39121	16	5912	0_2_1_0_1_23_1_0_2_0_0	ERR2172347
78476	H164380378	UK [England]	2016	1580	7847;20593;27264;39124	16	5915	0_2_1_0_1_23_3_0_0_0_0	ERR2172351
78479	H162760213	UK [Scotland]	2014	1580	7850;20596;27267;39126	16	5918	0_2_1_0_1_23_1_0_0_0_0	ERR2172354
78480	15363	Canada	1994	11421	6143;20597;48979;52432;53850;54100;71807;101705	409	5919;41662	0_12_0_1_0_0_0_0_0_0_0	SRR1661153
78481	18438	Canada	1996	1600	6145;20598;27268;39127;46348;48980;71808;85224;100109	550	5920;26498;40264	0_0_10_0_0_0_0_0_0_0_0	SRR1661154
78483	19984	Canada	1997	1904	6151;20600;27270;48981;52433;85225	432	5922;25925;26499;26690	0_13_2_0_0_0_0_0_0_0_0	SRR1661156
78490	23712	Canada	2001	12524	79923;109276	1202	5926	0_2_1_10_0_0_0_0_0_0_0	SRR1661163
78491	23729	Canada	2001	7363	7854;20604;85229	8	5927;26503	0_2_17_0_0_37_0_0_0_0_0	SRR1661164
78492	23836	Canada	2001	1587	7855;20605;54101	208	5928	0_2_36_3_3_0_0_0_0_0_0	SRR1661165
78507	28071	Canada	2006	1590	6164;20615;27275;39128;48988;57164;71816;85234;100110	435	5939;5940;26507;26508;40265;40266	0_12_2_2_0_0_0_0_0_0_0	SRR1661181
78508	28072	Canada	2006	1590	6165;20616;27276;39129;48989;57165;71817;85235;100111	435	5940;26508;40266	0_12_2_2_0_0_0_0_0_0_0	SRR1661182
78511	28445	Canada	2006	1901	7868;20618	18	5943	0_0_12_2_3_0_0_0_9_22_0	SRR1661185
78516	29055	Canada	2006	1901	7873;20622;71819	18	5948	0_0_12_2_3_0_0_0_9_21_0	SRR1661191
78519	29954	Canada	2007	12532	71821;85239	31	5951;25906;26511;26676	0_2_29_0_1_0_0_0_0_0_0	SRR1661194
78520	30016	Canada	2007	7363	7877;20626;85240	8	5952;26512	0_2_17_0_27_0_0_0_0_0_0	SRR1661195
78523	30871	Canada	2007	1901	7879;20628;27278	3	5955	0_2_0_1_0_0_33_0_0_1_0	SRR1661198
78529	31352	Canada	2008	1901	7885;20633;85244;100113	18	5961;26514	0_0_12_2_3_0_0_6_0_0_0	SRR1661204
78531	31357	Canada	2008	1901	7887;20635	3	5963	0_2_0_1_0_4_0_0_1_0_0	SRR1661206
78536	31834	Canada	2009	9363	7891;57167	16	5968	0_2_1_0_73_0_0_0_0_0_0	SRR1661211
78537	31858	Canada	2009	1901	7892;20638	3	5969	0_2_0_1_0_55_0_3_0_0_1	SRR1661212
78539	32118	Canada	2009	1901	7894;20639	18	5971	0_0_12_2_3_0_18_0_0_0_0	SRR1661214
78541	32320	Canada	2009	1901	7896;20641;91959	3	5973;32874	0_2_0_1_35_0_0_0_0_1_0	SRR1661217
78542	32330	Canada	2010	9363	7897;20642	16	5974	0_2_1_0_73_95_0_0_0_0_0	SRR1661218
78562	33316	Canada	2011	12536	112331	44	5989;44451	1_1_22_0_7_0_2_0_0_0_0	SRR1661241
78584	33997	Canada	2010	1901	7929;91965	3	6008	0_2_0_1_139_0_0_0_0_0_0	SRR1661265
78585	34067	Canada	2011	8163	6174;20673;39131;52447;71836;91966;105265	439	6009;32879;44455	5_2_0_1_0_0_0_0_0_0_0	SRR1661266
78593	34421	Canada	2011	1901	7936;20681;41046	3	6017	0_2_0_1_27_34_0_0_0_0_0	SRR1661274
78594	34442	Canada	2011	10634	112333	532	6018;44457	2_0_1_0_1_0_0_0_0_0_0	SRR1661275
78601	34688	Canada	2012	1585	112334	44	6025;26518;32881	1_1_22_0_1_0_0_0_0_0_0	SRR1661285
78602	34718	Canada	2011	12536	112335	44	6026;44458	1_1_22_0_7_0_0_0_2_0_0	SRR1661286
78603	34740	Canada	2011	12536	112336	44	6027	1_1_22_0_7_0_0_0_0_0_0	SRR1661287
78607	34842	Canada	2012	1901	7946;20693	3	6030	0_2_0_1_0_0_0_0_0_7_0	SRR1661292
78608	35169	Canada	2011	7827	7947;20694	219	6031	0_2_53_2_0_0_0_0_0_1_0	SRR1661293
78611	35317	Canada	2012	1600	10445;20696;27304;39135;57176;85252;101707;105272	151	6033;26519;44461	0_2_48_5_5_0_0_0_0_0_0	SRR1661296
78615	35332	Canada	2012	7827	8593;52459	219	6037	0_2_53_2_0_0_0_3_1_0_0	SRR1661300
78618	35335	Canada	2012	7827	7955;20702;85254	219	6040;26520	0_2_53_2_0_2_0_0_0_0_0	SRR1661303
78620	35346	Canada	2012	7827	7957;20704	219	6042	0_2_53_2_0_0_0_3_0_0_0	SRR1661305
78621	35352	Canada	2012	7827	7958;20705	219	6043	0_2_53_2_0_2_0_0_1_0_0	SRR1661306
78627	35425	Canada	2010	1902	6187;20711;27308;39137;52462;71846	42	6049	0_0_8_2_0_0_0_0_0_0_0	SRR1661312
78637	883218	Canada	1989	1927	71852;84970;85257	409	6057;26289;26523	0_12_0_0_1_0_0_0_0_0_0	SRR1661322
78640	DO17630	Denmark	1940	11678	71853;85258;105275	1060	6058;26524	1_8_1_0_0_0_0_0_0_0_0	ERR439286
78645	DO23085	Denmark	1941	11677	112337	1096	6060	1_8_0_0_0_0_0_0_0_0_0	ERR439293
78652	DO48739	Denmark	1943	11678	71856	1060	6062	1_8_1_0_1_0_0_0_1_0_0	ERR439304
78653	DO51056	Denmark	1943	12246	24178;49015;54105;105276	587	6063;44464	49_0_0_0_0_0_0_0_0_0_0	ERR439305
78656	DO2179	Denmark	1946	11686	24179;49016;54106;57177;80361;105277	588	6064;44465	24_0_0_0_0_0_0_0_0_0_0	ERR439309
78671	DO23096	Denmark	1951	8135	71857	1098	6065	7_0_0_0_0_0_0_0_0_0_0	ERR439325
78672	DO26346	Denmark	1951	1889	112339	497	6066	1_7_0_0_2_0_0_0_0_0_0	ERR439326
78673	DO26370	Denmark	1951	6812	24182;24204;105278	590	6067	1_9_0_0_0_0_0_0_0_0_0	ERR439327
78674	DO26537	Denmark	1951	11686	24183;49019;54107;57178;80362;105279	588	6068;44466	24_0_0_0_1_0_0_0_0_0_0	ERR439328
78675	DO26580	Denmark	1951	11703	24184;24205;57179;105280;118980	591	6069;52005	50_0_0_0_0_0_0_0_0_0_0	ERR439329
78676	DO1424	Denmark	1953	11686	24185;52466;54108;57180;80363;105281	588	6070;44467	24_0_0_0_2_0_0_0_0_0_0	ERR439331
78677	DO66401	Denmark	1953	11711	24186;71859;79389;105282;118981	592	6071;52006	48_0_1_0_0_0_0_0_0_0_0	ERR439334
78678	DO67893	Denmark	1953	11718	24187;71860;105283	593	6072	27_0_1_0_0_0_0_0_0_0_0	ERR439335
78679	DO32051	Denmark	1954	11249	24188;24206;52467;54109;57181;71861;105284	594	6073	27_0_3_0_0_0_0_0_0_0_0	ERR439336
78680	DO21958	Denmark	1954	11712	24189;71862;79390;105285;118982	595	6074;52007	48_0_0_0_0_0_0_0_0_0_0	ERR439337
78681	DO22492	Denmark	1954	11652	24190;24207;49020;57182;71863;105286	596	6075;44468	30_0_0_0_0_0_0_0_0_0_0	ERR439338
78687	DO3783	Denmark	1955	11368	24191;24208;27317;52468;57183;71864;105287	597	6076;44469	43_0_0_0_0_0_0_0_0_0_0	ERR439348
78690	DO47438	Denmark	1955	11695	24192;27318;71865;79391;105288	598	6077;44470	42_0_1_0_1_0_0_0_0_0_0	ERR439351
78691	DO48480	Denmark	1955	11695	24193;27319;71866;79392;105289	598	6078;44471	42_0_1_0_0_0_0_0_0_0_0	ERR439352
78695	DO40555	Denmark	1969	11679	112340	551	6079	1_1_20_0_0_0_0_0_0_0_0	ERR439356
78696	DO16938	Denmark	1956	10931	6216;20723;71868;79393;105291	491	6080	0_12_7_0_2_0_0_0_0_0_0	ERR439357
78699	DO11271	Denmark	1956	1599	112341;112342	599	6081;44472	28_0_0_0_0_0_0_0_0_0_0	ERR439361
78700	DO2475	Denmark	1956	1599	112342	599	6081;44472	28_0_0_0_0_0_0_0_0_0_0	ERR439362
78701	DO4034	Denmark	1956	1599	112342	599	6081;44472	28_0_0_0_0_0_0_0_0_0_0	ERR439363
78704	DO1783	Denmark	1958	11714	24196;105294	600	6082	27_0_5_0_0_0_0_0_0_0_0	ERR439367
78705	DO100	Denmark	1961	1889	112343	497	6083	1_7_0_0_3_0_0_0_0_0_0	ERR439370
78706	DO156	Denmark	1961	10931	6222;20724;27321;39139;50472;52471;53851;71870;105296	491	6084	0_12_7_2_0_0_0_0_0_0_0	ERR439371
78707	DO1197	Denmark	1961	11676	6223;20725;27322;39140;50473;52472;71871;84437;85259;105297	552	6085;25827;26525;44473	1_8_8_1_0_0_0_0_0_0_0	ERR439373
78709	DO97-48	Denmark	1997	1903	7976;20726;27323;71873;105299	64	6087	0_2_37_0_1_0_0_0_0_0_0	ERR502177
78710	DO98-95	Denmark	1998	1931	112345	155	6088	1_1_27_0_0_0_0_0_0_0_0	ERR502178
78713	DO02-258	Denmark	2002	1901	7980;20730;27325;57188;71876;79394;91975;100116;105302	3	6091;32887;40269;44474	0_2_0_19_0_0_0_0_0_0_0	ERR502182
78714	DO02-270	Denmark	2002	1901	7981;20731;27326;71877;79395;91976;100117;105303	3	6091;32887;40269;44474	0_2_0_19_0_0_0_0_0_0_0	ERR502183
78716	DO04-238	Denmark	2004	6721	79924;90898;91977;98460;105305	1203	6093;31881;32888;38695;44475	0_0_51_0_0_0_0_0_0_0_0	ERR502185
78718	DO06-398	Denmark	2006	1893	71880	31	6095	0_2_29_2_0_0_0_0_0_0_0	ERR502187
78719	DO07-27	Denmark	2007	1893	71881	31	6096	0_2_29_2_0_1_0_0_0_0_0	ERR502188
78727	DO13-72	Denmark	2013	8130	7992;20742;27331;53919;71885;105310	32	6104	0_0_41_2_2_0_0_0_0_0_0	ERR502198
78730	DO13-142	Denmark	2013	1588	6246;20744;27332;57189;71886;105311	21	6107	0_0_33_12_8_0_0_0_0_0_0	ERR502201
78732	DO13-175	Denmark	2013	1594	6250;20746;27333;80367	414	6109	1_8_5_0_28_0_0_0_0_0_0	ERR502203
78738	DO13-440	Denmark	2013	1588	6264;20752;27336;39141;52478;71890;79396;105315	21	6115	0_0_33_12_43_0_0_0_0_0_0	ERR502210
78739	DO13-242	Denmark	2013	7365	15369;27337;50474;52479;71891;79397;85262;90900;105316	577	6116;26528;31883;44477	0_2_47_0_0_0_0_0_0_0_0	ERR502211
78741	DO80-1256	Denmark	1980	11696	6266;20753;54112;71893	407	6117	8_1_0_3_0_0_0_0_0_0_0	ERR502213
78744	DO81-2997	Denmark	1981	1594	6283;20755;27338;39142;71894;91979	414	6119	1_8_5_0_0_0_0_0_0_0_0	ERR502216
78745	DO82-343	Denmark	1982	8151	6285;20756;27339;57194;71895;85264;105319	553	6120;26529;44478	4_0_0_0_0_0_0_0_0_0_0	ERR502217
78755	DO87-1128	Denmark	1987	7371	10455;20759;27340;39143;52481;85265;100119;105322	373	6124;40270;44479	0_2_8_0_0_0_0_0_0_0_0	ERR502227
78758	DO91-314	Denmark	1991	11421	6291;20761;57195	409	6127	0_12_0_2_0_0_0_0_0_0_0	ERR502230
78760	DO92-294	Denmark	1992	1599	71899	1036	6129	1_1_4_0_0_0_0_0_0_0_0	ERR502232
78763	DO95-171	Denmark	1995	1600	71901;80369;85267	1100	6132;26533	0_0_44_0_0_0_0_0_0_0_0	ERR502235
78765	DO96-92	Denmark	1996	1580	8015;20768	16	6134	0_2_1_0_0_0_0_0_0_0_0	ERR502237
78766	DONV51-26544	Denmark	1951	11708	24198;24210;52482;54115;57198;80370;105325	601	6135;44480	44_0_0_0_0_0_0_0_0_0_0	ERR775141
78771	DONV62-4623	Denmark	1962	10931	6296;20769;24214;27347;53920;71902;91981;105326	491	6136;32891;44481	0_12_7_0_0_0_0_0_0_0_0	ERR775154
78773	DONV44-54211	Denmark	1944	1889	112346	497	6138	1_7_0_0_0_0_0_0_0_0_0	ERR779765
78775	DONV59-82	Denmark	1959	7365	6301;20771;27349;52483;71905;100121	490	6139;40273	35_0_0_0_0_0_0_0_0_0_0	ERR779771
78776	DONV59-646	Denmark	1959	7365	6314;20772;27350;71906;100122	490	6140;40274	35_0_0_0_1_0_0_0_0_0_0	ERR779772
78777	DONV58-1148	Denmark	1958	11201	24199;54116;71907;105328	602	6141;44482	11_1_0_0_0_0_0_0_0_0_0	ERR779774
78780	DONV44-7072	Denmark	1944	1889	112347	497	6142	1_7_0_0_1_1_0_0_0_0_0	ERR779794
78781	DONV44-8053	Denmark	1944	1889	6315;20773;27351;71909;85268	497	6143;26534	1_7_0_0_1_0_0_1_0_0_0	ERR779799
78782	DONV43-19018	Denmark	1943	11683	79925;118983	1204	6144;52008	47_0_0_0_0_0_0_0_0_0_0	ERR779802
78783	DONV56-7616	Denmark	1956	1889	112348	497	6145	1_7_0_0_1_0_0_0_0_0_0	ERR779803
78784	DONV45-41906	Denmark	1945	1889	112349	497	6146	1_7_0_0_1_2_0_0_0_0_0	ERR779811
78790	DONV43-54204	Denmark	1943	11253	6322;20775;27354;52485;53852;54117;71913	493	6147	49_1_0_0_0_1_0_0_0_0_0	ERR779833
78791	DONV43-64995	Denmark	1943	11716	24202;27355;105329	604	6148;44483	32_0_0_0_0_0_0_0_0_0_0	ERR779836
78802	VNM11-10	Vietnam	2011	10313	8019;20776;27356;57199;71914;79399;91982	263	6149;32892	0_2_23_1_1_0_0_0_0_0_0	ERR3623127
78804	VNM11-101	Vietnam	2011	1600	8020;20778;49022;54118	151	6151	0_2_48_3_1_0_0_0_0_1_0	ERR3623129
78805	VNM11-102	Vietnam	2011	1600	8021;20779;49023;57201	151	6152	0_2_48_3_1_0_0_0_0_0_0	ERR3623130
78808	VNM11-105	Vietnam	2011	11230	71917	133	6155	0_2_9_4_0_0_0_0_3_0_0	ERR3623133
78809	VNM11-106	Vietnam	2011	1588	71918;82087;90904;100124;105331	21	6156;31886;40276	0_0_33_0_0_0_0_0_0_0_0	ERR3623134
78811	VNM11-108	Vietnam	2011	1901	10460;20784;27360;39146;91983;100125;105332	18	6158;32893;40277;44485	0_0_12_2_39_0_0_0_0_0_0	ERR3623136
78812	VNM11-11	Vietnam	2011	7822	8026;20785;27361;71920;85271	133	6159;26537	0_2_9_14_31_0_0_0_0_0_0	ERR3623137
78814	VNM11-13	Vietnam	2011	9900	8028;20787;52488;71922;100126	133	6161;40278	0_2_9_14_47_0_0_0_0_0_0	ERR3623139
78816	VNM11-15	Vietnam	2011	1920	71923	1051	6163	0_0_50_0_0_0_0_0_0_1_0	ERR3623143
78818	VNM11-17	Vietnam	2011	7827	8031;20790;27363;57206;101709	219	6165	0_2_53_1_0_0_0_0_0_0_0	ERR3623145
78821	VNM11-20	Vietnam	2011	1920	71926	1051	6168	0_0_50_0_0_0_0_0_0_1_0	ERR3623150
78822	VNM11-21	Vietnam	2011	1600	9030;20793;27365;54119;85274;100128;105334	151	6169;26540;44487	0_2_48_5_3_0_0_0_0_0_0	ERR3623151
78823	VNM11-22	Vietnam	2011	1920	71927	1051	6170	0_0_50_0_0_0_0_0_0_0_0	ERR3623152
78824	VNM11-23	Vietnam	2011	7360	8603;20795;27366;52489;71928;84910;85275	374	6171;26541	0_0_16_0_0_0_0_0_0_0_0	ERR3623153
78828	VNM11-27	Vietnam	2011	10313	8036;20799;49029;57210	263	6175	0_2_23_1_0_0_0_0_0_0_0	ERR3623158
78829	VNM11-28	Vietnam	2011	1600	8037;20800;39149;49030;57211	148	6176	0_0_57_1_0_0_0_0_0_0_0	ERR3623159
78832	VNM11-30	Vietnam	2011	6714	71931;85277	555	6179;26237;26543	0_10_0_0_0_0_0_0_0_0_0	ERR3623162
78833	VNM11-31	Vietnam	2011	1920	71932	1051	6163	0_0_50_0_0_0_0_0_0_1_0	ERR3623163
78834	VNM11-32	Vietnam	2011	7371	8040;20805;27371;71933	34	6180	0_2_16_0_0_0_0_0_0_0_0	ERR3623164
78841	VNM11-39	Vietnam	2011	1600	9633;20809;27376;54121;71938;91992;105340	148	6186;32900	0_0_57_0_3_0_0_0_0_0_0	ERR3623171
78846	VNM11-43	Vietnam	2011	7371	8047;20814;71942	34	6189	0_2_16_0_0_6_0_0_0_0_0	ERR3623176
78848	VNM11-45	Vietnam	2011	1600	8048;20815;39153;49032;54122	148	6176	0_0_57_1_0_0_0_0_0_0_0	ERR3623178
78849	VNM11-46	Vietnam	2011	7371	8049;20816;71943;79400	34	6191	0_2_16_0_0_5_0_1_0_0_0	ERR3623179
78853	VNM11-5	Vietnam	2011	10313	8052;20818;27378;52495;71944;79401;91996	263	6149;32892	0_2_23_1_1_0_0_0_0_0_0	ERR3623183
78854	VNM11-50	Vietnam	2011	7360	9032;27379;39154;52496;57222;91997	151	6194;32903	0_2_48_9_0_0_0_0_0_0_0	ERR3623184
78856	VNM11-52	Vietnam	2011	1600	8606;20819;27380;57223;85282;100132;105343	151	6196;26549;44492	0_2_48_5_3_0_0_0_0_1_0	ERR3623186
78858	VNM11-54	Vietnam	2011	10313	8053;20820;27381;57225;71945;79403;91999	263	6197;32904	0_2_23_1_1_0_0_0_0_1_0	ERR3623188
78860	VNM11-56	Vietnam	2011	11230	71946;92001	133	6199	0_2_9_4_0_0_1_0_0_0_0	ERR3623190
78861	VNM11-57	Vietnam	2011	6714	71947;85283	555	6200;26239;26550	0_10_0_0_0_0_0_0_0_1_0	ERR3623191
78863	VNM11-59	Vietnam	2011	10313	8057;20824;27385;57229;71948;79404;92002	263	6197;32904	0_2_23_1_1_0_0_0_0_1_0	ERR3623193
78864	VNM11-6	Vietnam	2011	10313	8058;20825;27386;57230;71949;79405;92003	263	6149;32892	0_2_23_1_1_0_0_0_0_0_0	ERR3623194
78872	VNM11-67	Vietnam	2011	1920	71957	1051	6209	0_0_50_0_0_0_0_0_0_2_0	ERR3623202
78876	VNM11-70	Vietnam	2011	7827	10467;20836;27395;57235;101714	219	6213	0_2_53_1_0_0_1_0_0_0_0	ERR3623206
78879	VNM11-73	Vietnam	2011	11231	8070;20839;39157;49036	149	6216	0_2_64_0_4_0_0_0_0_0_0	ERR3623210
78880	VNM11-74	Vietnam	2011	12518	8071;20840;27397;49037;71961	34	6217	0_2_16_2_0_0_0_0_0_0_0	ERR3623211
78881	VNM11-75	Vietnam	2011	7371	8072;20841;27398;71962	34	6218	0_2_16_0_0_7_0_0_0_0_0	ERR3623212
78882	VNM11-76	Vietnam	2011	1920	71963	1051	932;6163;6168;6219	0_0_50_0_0_0_0_0_0_1_0	ERR3623213
78886	VNM11-8	Vietnam	2011	11230	71966	133	6222	0_2_9_4_0_0_0_0_3_0_0	ERR3623217
78889	VNM11-82	Vietnam	2011	10313	8079;20847;49041;57239	263	6225	0_2_23_1_0_0_0_0_0_0_0	ERR3623220
78891	VNM11-84	Vietnam	2011	1920	71970;80374	1051	932;6163;6168;6219	0_0_50_0_0_0_0_0_0_1_0	ERR3623222
78892	VNM11-85	Vietnam	2011	1600	9034;27401;57241;71971;85287;105349	151	6226;26554;44495	0_2_48_5_1_0_0_0_0_0_0	ERR3623223
78894	VNM11-87	Vietnam	2011	7822	8083;20851;27403;71972;92005	133	6164;32894	0_2_9_23_0_0_0_0_0_0_0	ERR3623225
78900	VNM11-92	Vietnam	2011	1600	8087;20855;27405;57243	151	6232	0_2_48_3_0_0_0_0_0_0_0	ERR3623231
78903	VNM11-95	Vietnam	2011	7371	8090;20857;71978	34	6235	0_2_16_0_0_3_0_0_0_0_0	ERR3623234
78907	VNM11-99	Vietnam	2011	7827	8093;20860;57246;92006	219	6239;32907	0_2_53_2_0_5_0_1_0_0_0	ERR3623350
78910	VNM16-100	Vietnam	2016	7360	8095;20862;27408;52506;54123;71983	346	6241	0_0_14_0_4_0_0_0_0_0_0	ERR3623353
78915	VNM16-105	Vietnam	2016	7371	8099;20866;39164;71986;105353	34	6245	0_2_16_0_3_0_0_0_0_0_0	ERR3623358
78918	VNM16-108	Vietnam	2016	1925	71988;80377	416	6248	0_0_18_19_2_0_0_0_0_0_0	ERR3623361
78920	VNM16-11	Vietnam	2016	1921	6377;20870;27411;52507;57248;71989;79410;92010	21	6249;32911	0_0_33_13_0_0_0_0_0_0_0	ERR3623363
78922	VNM16-111	Vietnam	2016	1588	6378;20872;27412;39166;57249;71991	21	6251	0_0_33_12_29_0_0_0_0_0_0	ERR3623365
78929	VNM16-118	Vietnam	2016	10241	9014;20879;27416;52508;90912	352	6258;31891	0_2_0_32_17_0_0_0_0_0_0	ERR3623372
78933	VNM16-122	Vietnam	2016	7371	8111;20881;52509;71994;79411	34	6261	0_2_16_0_3_2_0_0_0_0_0	ERR3623376
78934	VNM16-123	Vietnam	2016	10241	9035;27418;52510;90913	352	6258;31891	0_2_0_32_17_0_0_0_0_0_0	ERR3623377
78936	VNM16-125	Vietnam	2016	7363	8113;20883;27420;39168;80381	8	6263	0_2_17_0_16_0_0_0_0_0_0	ERR3623379
78937	VNM16-126	Vietnam	2016	7823	8114;20884;27421;57255	133	6264	0_2_9_11_0_0_0_0_0_0_0	ERR3623380
78943	VNM16-131	Vietnam	2016	7363	8118;20888;27423;39171;92020	8	6269;32921	0_2_17_0_9_2_0_0_0_0_0	ERR3623386
78945	VNM16-14	Vietnam	2016	8153	8120;20890;49047;72000;79412;105359	3	6240;44497	0_2_0_1_176_1_0_0_0_0_0	ERR3623388
78948	VNM16-17	Vietnam	2016	10314	8123;20893;27425;72002;92022	3	6267;32919	0_2_0_16_2_0_1_0_0_0_0	ERR3623391
78952	VNM16-21	Vietnam	2016	8123	15370;27428;39173;52511;92025	367	6275;32924	0_0_15_0_0_4_0_0_0_2_0	ERR3623412
78953	VNM16-22	Vietnam	2016	8123	12686;27429;39174;52512;92026	367	6275;6276;32924;32925	0_0_15_0_0_4_0_0_0_2_0	ERR3623413
78954	VNM16-23	Vietnam	2016	1600	9634;27430;39175;54124;72004;85294;90915;92027;100146;101717	353	31803;32926;40292;41668	0_2_48_14_0_0_0_0_0_0_0	ERR3623414
78955	VNM16-24	Vietnam	2016	7371	8125;20896;57260;72005;92028	34	6277	0_2_16_0_5_0_0_0_0_0_0	ERR3623415
78956	VNM16-25	Vietnam	2016	7371	8126;20897;27431;57261;72006;79413	34	6278	0_2_16_0_3_1_0_0_0_0_0	ERR3623416
78958	VNM16-29	Vietnam	2016	1600	8610;20899;27433;54125;72007;79414;92030;105362	148	6280;32928	0_0_57_0_4_0_0_0_0_0_0	ERR3623418
78969	VNM16-4	Vietnam	2016	8123	9636;27442;39177;52517;92035	367	6290;32933	0_0_15_0_0_4_0_0_0_0_0	ERR3623430
78976	VNM16-46	Vietnam	2016	7822	8137;20914;27449;39182;72015;92041	133	6292;6294;6295;32935;32936;32937	0_2_9_14_54_0_0_0_0_0_0	ERR3623437
78977	VNM16-47	Vietnam	2016	12514	9038;20915;27450;52519;57266;85297;92042	133	6287;32932	0_2_9_24_0_0_0_0_0_0_0	ERR3623438
78979	VNM16-49	Vietnam	2016	11173	9635;27451;100149;105365	401	6297	0_2_62_0_3_0_0_0_0_0_0	ERR3623440
78983	VNM16-52	Vietnam	2016	11173	10826;27452;100150;105366	401	6297	0_2_62_0_3_0_0_0_0_0_0	ERR3623444
78984	VNM16-53	Vietnam	2016	10314	8141;20919;52521	3	6300	0_2_0_16_13_0_0_0_0_0_0	ERR3623445
78987	VNM16-57	Vietnam	2016	7823	72016;85535	133	6303;26795	0_2_9_4_1_0_0_0_0_0_0	ERR3623448
78994	VNM16-65	Vietnam	2016	7363	8148;20927;39190	8	6307	0_2_17_0_9_0_0_3_0_1_0	ERR3623455
78996	VNM16-67	Vietnam	2016	16471	8150;20929;27458;52526;100151	352	6309;40294	0_2_0_32_3_2_0_0_0_0_0	ERR3623457
79003	VNM16-74	Vietnam	2016	1588	6476;20935;52528;92053	21	6315;32946	0_0_33_12_3_4_0_0_0_0_0	ERR3623465
79007	VNM16-78	Vietnam	2016	7371	8159;20939;57277;72023;92055	34	6277	0_2_16_0_5_0_0_0_0_0_0	ERR3623469
79008	VNM16-8	Vietnam	2016	8123	8613;20940;27465;39193;52529;92056	367	6290;32933	0_0_15_0_0_4_0_0_0_0_0	ERR3623470
79014	VNM16-85	Vietnam	2016	1901	9040;27467;50481;52530;80389;92059	3	6311;32943	0_2_0_0_0_0_0_0_0_0_0	ERR3623476
79023	VNM16-93	Vietnam	2016	7363	8168;20951;39199;85536	8	6325;26774	0_2_17_0_9_0_0_5_0_0_0	ERR3623485
79025	VNM16-96	Vietnam	2016	8123	8615;27473;39201;52533;92065	367	6327;32951	0_0_15_0_0_4_0_0_0_1_0	ERR3623487
79057	GCWGS_0163	USA	2016	1901	8175;20959;27478;46362;57284;82091;105376	3	6337;44507	0_2_0_4_16_0_0_0_0_2_0	SRR4048864
79064	GCWGS_0394	USA	2016	1893	72041;85304	31	6344;26565	0_2_29_9_1_0_0_0_0_0_0	SRR5198517
79072	GCWGS_0129	USA	2016	1584	112354	41	6352;32953;44509	1_1_2_0_13_0_0_0_0_0_0	SRR5198587
79075	GCWGS_0078	USA	2016	9363	8192;20977;27490	16	6355	0_2_1_0_181_2_0_0_0_0_0	SRR5198638
79079	GCWGS_0014	USA	2016	13539	6496;20981;27494;46365;54126;57291;85308	304	6359	0_0_1_0_13_0_0_0_0_0_0	SRR5198674
79088	GCWGS_0552	USA	2016	9363	8205;20990;27500	16	6368;6369	0_2_1_0_181_2_0_0_2_0_0	SRR5235209
79095	GCWGS_0414	USA	2016	10932	6535;20996;27506;46368;80398;85538;92074	304	6375;32958	0_0_1_0_12_0_0_1_0_0_0	SRR5235318
79096	GCWGS_0413	USA	2016	9363	8212;20997;27507	16	6376	0_2_1_0_181_2_0_0_1_0_0	SRR5235319
79098	GCWGS_0382	USA	2016	11181	6554;20999;27509;57296;92076;98463;100025;105384;118984	24	6378;32960;38697;40183;40185;52009	0_0_43_8_2_2_0_0_0_0_0	SRR5235322
79099	GCWGS_0311	USA	2016	1580	72049	16	6379	0_2_1_0_20_3_0_0_0_0_0	SRR5235365
79101	GCWGS_0307	USA	2016	9363	8216;21002;27511	16	6381	0_2_1_0_73_72_0_0_0_1_0	SRR5235369
79102	GCWGS_0306	USA	2016	9363	8217;21003;27512	16	6365	0_2_1_0_181_2_0_0_0_1_0	SRR5235370
79104	GCWGS_0294	USA	2016	11864	72050	16	6383	0_2_1_1_8_0_0_0_1_0_0	SRR5235382
79107	GCWGS_0287	USA	2016	9363	8222;21007;27515	16	6382;6386	0_2_1_0_73_72_0_0_0_0_0	SRR5235388
79112	GCWGS_0269	USA	2016	1893	72051;85312	31	6391;26568	0_2_29_9_6_0_0_0_0_0_0	SRR5235401
79120	GCWGS_0773	USA	2016	9363	8235;21020;27524	16	6399	0_2_1_0_73_124_0_0_0_1_0	SRR5990374
79124	GCWGS_0640	USA	2016	1600	8238;21023;27527;39211;46371;49059;54127;57301;85314;92078	16	6403;26570;32961	0_2_2_0_0_1_2_0_0_0_0	SRR5990426
79130	GCWGS_0824	USA	2016	9363	8243;21028;57305;92080	16	6409;32963	0_2_1_0_73_77_0_0_0_0_0	SRR7401668
79131	GCWGS_0838	USA	2016	1584	112356	41	6410	1_1_2_0_49_0_0_0_1_0_0	SRR7401669
79145	GCWGS_1620	USA	2016	1584	112360	41	6423	1_1_2_0_49_0_0_0_1_1_0	SRR7401683
79159	LRRBGS_0336	USA	2016	8134	8270;21054;27549;72065	16	6437	0_2_1_0_150_0_0_0_0_0_0	SRR8079713
79170	LRRBGS_0312	USA	2016	9363	8280;21063	16	6447	0_2_1_0_105_2_0_0_3_0_0	SRR8079724
79176	LRRBGS_0631	USA	2016	9363	8285;21069;27561;39221;57312	16	6452	0_2_1_0_105_5_0_0_0_0_0	SRR8079730
79180	LRRBGS_0360	USA	2016	9363	8288;21071;27564	16	6455	0_2_1_0_105_3_0_0_1_0_0	SRR8079735
79183	LRRBGS_0632	USA	2016	9363	8291;21074;27567;101721	16	6457	0_2_1_0_105_5_0_0_0_0_0	SRR8079739
79184	LRRBGS_0633	USA	2016	9363	8292;21075;27568	16	6452;6457;6458	0_2_1_0_105_5_0_0_0_0_0	SRR8079740
79190	LRRBGS_0353	USA	2016	7371	9042;27574;41057;72075	34	6464	0_2_16_5_0_0_0_0_0_0_0	SRR8079746
79196	LRRBGS_0326	USA	2016	1580	8302;21085;27579;85317	16	6469;26573	0_2_1_0_20_2_0_0_0_0_0	SRR8079752
79199	LRRBGS_0325	USA	2016	9363	8305;21088;49064;57315	16	6471	0_2_1_0_73_91_0_0_1_0_0	SRR8079755
79213	LRRBGS_0252	USA	2016	8156	8318;21101;27592;41058;80404	17	6485	0_2_15_0_9_1_0_0_0_0_0	SRR8079769
79222	LRRBGS_0242	USA	2016	11181	6589;21109;27598;57322;72084;85541;105397	24	6494;26799;44513	0_0_43_8_1_3_0_0_0_0_0	SRR8079800
79223	LRRBGS_0241	USA	2016	13413	72085;100171	509	6495;40310	0_0_43_12_3_0_0_0_0_0_0	SRR8079801
79225	LRRBGS_0248	USA	2016	11986	8329;21112;27600;46374;57323	17	6497	0_2_15_0_49_0_0_0_0_0_0	SRR8079804
79227	LRRBGS_0634	USA	2016	1579	8331;21114;27602;80406	24	6499	0_0_43_1_0_23_0_1_0_0_0	SRR8079806
79235	LRRBGS_0231	USA	2016	9363	8336;21120;27604;105398	16	6504	0_2_1_0_94_3_0_0_0_0_0	SRR8079818
79240	LRRBGS_0236	USA	2016	10931	6616;21125;27609;57324;88494;92089	422	6509;29570	0_12_9_3_1_0_0_0_0_0_0	SRR8079823
79246	LRRBGS_0265	USA	2016	1600	8344;21129;39233;46375;54128;57328;92090	16	6514;32969	0_2_2_0_0_1_0_0_0_0_0	SRR8079829
79248	LRRBGS_0267	USA	2016	1599	72093	243	6516	1_1_17_6_21_0_0_0_0_0_0	SRR8079831
79249	LRRBGS_0262	USA	2016	11181	6622;21132;27614;57329;72094;105402;118985	24	6517;52010	0_0_43_8_2_0_0_0_0_0_0	SRR8079832
79254	LRRBGS_0257	USA	2016	6962	72097	1026	6522	2_0_2_0_2_0_0_0_0_0_0	SRR8079838
79255	LRRBGS_0258	USA	2016	8149	6634;21137;27619;52542;57331;72098;109283	506	6523	5_2_0_4_1_0_0_0_0_0_0	SRR8079839
79261	LRRBGS_0251	USA	2016	6962	72103	1026	6529	2_0_2_0_1_0_0_0_0_0_0	SRR8079845
79271	LRRBGS_0206	USA	2016	12905	72104	516	6539	0_18_13_0_18_0_0_0_0_0_0	SRR8079856
79277	LRRBGS_0204	USA	2016	9363	8369;21158;52546;57340	16	6545	0_2_1_0_198_0_0_1_0_1_0	SRR8079862
79279	LRRBGS_0202	USA	2016	1584	112369	41	6546;32971	1_1_2_0_10_0_0_0_1_0_0	SRR8079864
79280	LRRBGS_0201	USA	2016	6962	72110;105407;109284	1104	6547	2_0_0_1_0_0_0_0_0_0_0	SRR8079865
79281	LRRBGS_0286	USA	2016	8143	8371;21160	62	6548	0_0_26_6_0_3_0_0_0_0_0	SRR8079866
79284	LRRBGS_0309	USA	2016	9363	8374;21163;27636	16	6551	0_2_1_0_73_73_0_0_1_0_0	SRR8079869
79285	LRRBGS_0291	USA	2016	1918	72112	415	6552	26_0_0_0_7_0_0_0_0_0_0	SRR8079871
79286	LRRBGS_0290	USA	2016	8156	8375;21164;27638;52550;72113;85327;100176	17	6553;26582;40315	0_2_15_0_15_0_0_0_0_0_0	SRR8079872
79287	LRRBGS_0283	USA	2016	9363	8376;21165	16	6554	0_2_1_0_178_0_0_0_0_0_0	SRR8079873
79290	LRRBGS_0297	USA	2016	9363	8379;21168;41063;57344;85329	16	6557;26584	0_2_1_0_218_0_0_0_0_0_0	SRR8079876
79295	LRRBGS_0298	USA	2016	8156	8384;21173;27642;52551;72118;85331;100178	17	6562;26586;40317	0_2_15_0_17_0_0_0_0_0_0	SRR8079881
79301	LRRBGS_0191	USA	2016	1579	8388;21177;27646;52553;57348;105412	24	6566	0_0_43_1_0_22_3_2_0_0_0	SRR8079887
79304	LRRBGS_0192	USA	2016	1584	112370	41	6569;31899	1_1_2_0_10_0_0_1_0_0_0	SRR8079890
79305	LRRBGS_0196	USA	2016	13526	8391;21181;105415	62	6570	0_0_26_6_1_1_0_0_0_0_0	SRR8079891
79307	LRRBGS_0289	USA	2016	1588	72124	21	6572	0_0_33_12_54_0_0_0_0_0_0	SRR8079893
79313	LRRBGS_0276	USA	2016	10931	6680;21188;27655;57353;92098;105417	422	6578;32974	0_12_9_3_0_0_0_0_0_0_0	SRR8079899
79315	LRRBGS_0279	USA	2016	13489	8399;27657;52557	219	6580	0_2_53_2_13_13_0_0_0_0_0	SRR8079901
79318	LRRBGS_0273	USA	2016	12974	8402;21192;27660;100181	219	6583;40320	0_2_53_2_53_0_0_0_0_0_0	SRR8079904
79319	LRRBGS_0274	USA	2016	8156	8403;21193;52558;90927;92099	17	6584;31900;32975	0_2_15_0_5_2_0_0_0_0_0	SRR8079905
79320	LRRBGS_0366	USA	2016	9363	8404;21194;85335	16	6532	0_2_1_0_105_2_0_0_4_0_0	SRR8079907
79321	LRRBGS_0349	USA	2016	7371	11371;21195;27661;30692;41065;41165;72128;73963;85336;85970	34	6585;26589	0_2_16_5_0_0_0_1_0_0_0	SRR8079908
79328	LRRBGS_0364	USA	2016	9363	8410;21202	16	6532	0_2_1_0_105_2_0_0_4_0_0	SRR8079915
79333	LRRBGS_0223	USA	2016	1588	6694;21207;27666;41068;50491;72131	21	6593	0_0_33_12_84_0_0_0_0_0_0	SRR8079920
79337	LRRBGS_0226	USA	2016	1901	8417;21210;27669;100182	3	6597;40321	0_2_0_1_163_0_0_0_0_0_0	SRR8079925
79349	LRRBGS_0210	USA	2016	16474	6711;21222;52560;57361;72136;79420;92104;100184;109285	506	6607;32980;40323	5_2_0_4_0_0_0_0_0_0_0	SRR8079937
79352	LRRBGS_0213	USA	2016	11181	6714;21225;27676;39244;57363	24	6610	0_0_43_8_3_0_0_0_0_0_0	SRR8079940
79355	LRRBGS_0212	USA	2016	10931	6717;21228;27678;54129;57365	422	6613	0_12_9_3_9_0_0_0_0_0_0	SRR8079943
79357	LRRBGS_0216	USA	2016	7822	8434;21230;27679	133	6615	0_2_9_14_6_8_0_0_0_2_0	SRR8079945
79360	GCWGS_0606	USA	2016	12462	8437;21233;27681;57366	244	6618	1_1_5_0_4_0_0_0_0_0_0	SRR8088113
79362	GCWGS_0244	USA	2016	9363	8439;21235;27683	16	6620	0_2_1_0_89_0_0_0_0_0_0	SRR8088126
79363	GCWGS_0637	USA	2016	11181	6721;21236;27684;54130;80416	24	6621	0_0_43_8_7_0_0_0_0_0_0	SRR8088130
79366	GCWGS_0320	USA	2016	1584	112375	41	6624;9383	1_1_2_0_49_0_0_0_1_7_0	SRR8088161
79369	GCWGS_0597	USA	2016	11986	112378	41	6627	1_1_2_0_22_0_1_0_0_0_0	SRR8088181
81920	09-037	Japan	1997	7363	8462;21253	8	6640	0_2_17_0_0_8_0_0_2_0_0	DRR237458
81921	09-020	Japan	1997	7363	8463;21254	8	6641	0_2_17_0_0_9_0_0_0_0_0	DRR237459
81923	11-001	Japan	1999	7363	8465;21255;52562;92107	8	6643;32982	0_2_17_0_0_8_0_0_5_0_0	DRR237461
81924	98-093	Japan	1998	7363	8466;21256	8	6644	0_2_17_0_0_8_0_0_0_5_0	DRR237462
81925	09-013	Japan	1997	7363	8467;21257	8	6645	0_2_17_0_0_8_0_0_0_2_1	DRR237463
81927	98-095	Japan	1998	7363	8469;21259	8	6647	0_2_17_0_0_8_0_0_1_0_0	DRR237465
81928	98-025	Japan	1996	7363	8470;21260	8	6648	0_2_17_0_0_8_0_0_0_8_0	DRR237466
81930	98-118	Japan	1998	7363	8472;21262	8	6650	0_2_17_0_0_8_0_1_0_0_0	DRR237468
81932	98-135	Japan	1998	7363	8474	8	6652	0_2_17_0_0_8_0_0_4_0_0	DRR237470
81933	12-029	Japan	2000	7363	8475;21264	8	6653	0_2_17_0_41_0_0_0_0_0_0	DRR237471
81937	08-054	Japan	1996	7363	8479;21267	8	6657	0_2_17_0_0_8_0_4_0_0_0	DRR237475
81940	98-094	Japan	1998	7363	8482;21270	8	6660	0_2_17_0_0_8_0_0_0_6_0	DRR237478
81945	98-109	Japan	1998	7363	8487;21275;27702;84443	8	6665;25833	0_2_17_0_3_0_0_0_0_0_0	DRR237483
81950	09-024	Japan	1997	7363	8492;21280	8	6670	0_2_17_0_0_1_0_0_2_0_0	DRR237488
81952	12-026	Japan	2000	7363	8494;21282	8	6672	0_2_17_0_0_11_0_0_0_0_0	DRR237490
81954	98-021	Japan	1996	7363	8496;21284;39250	8	6674	0_2_17_0_0_1_0_0_0_0_0	DRR237492
81955	09-036	Japan	1997	7363	8497;21285;39251;52563	8	6675	0_2_17_0_0_1_0_0_1_0_0	DRR237493
81959	98-133	Japan	1998	7363	8501;21289	8	657;911	0_2_17_0_0_3_0_0_0_0_0	DRR237497
81968	16-39	Japan	2003	7363	8510;21295	8	6685	0_2_17_0_1_0_0_0_0_0_0	DRR237506
81971	13-12	Japan	2001	7363	8513;21298	8	6688	0_2_17_0_0_29_0_0_0_1_0	DRR237509
81975	13-108	Japan	2001	7363	8517;21302;27708;80417	8	6692;6694	0_2_17_0_0_15_0_0_0_0_0	DRR237513
81978	16-68	Japan	2004	7363	8520;21305	8	6695	0_2_17_0_37_0_0_0_0_0_0	DRR237516
81979	13-118	Japan	2001	7363	8521;21306;85549	8	6696;26806	0_2_17_0_0_30_0_0_0_0_0	DRR237517
81988	14-26	Japan	2002	7363	8530;21315;50507	8	6705	0_2_17_0_0_21_0_0_0_0_0	DRR237526
81992	17-19	Japan	2004	7363	8534;21319;27710;50497;85551	8	6709;26808	0_2_17_0_0_27_0_1_0_0_0	DRR237530
81997	16-79	Japan	2004	7363	8539;21323	8	6714	0_2_17_0_0_26_1_1_0_0_0	DRR237535
81998	16-16	Japan	2003	7363	8540;21324	8	6715	0_2_17_0_0_26_1_0_0_0_0	DRR237536
82001	12-036	Japan	2000	7363	8543;21327	8	6718	0_2_17_0_0_5_0_0_0_0_0	DRR237539
82002	98-076	Japan	1997	7363	8544;21328	8	6719	0_2_17_0_0_4_0_0_0_0_1	DRR237540
82010	17-13	Japan	2004	7363	8551;21335	8	6726;6727	0_2_17_0_31_0_1_0_0_0_0	DRR237548
82012	17-27	Japan	2004	7363	8553;21337	8	6729	0_2_17_0_35_0_0_0_0_0_0	DRR237550
82018	17-16	Japan	2004	7363	8559;21343;27717	8	6735	0_2_17_0_31_2_0_0_0_0_0	DRR237556
82020	17-64	Japan	2005	7363	8561;21345;27719;46381;85553	8	6737	0_2_17_0_31_2_1_1_1_0_0	DRR237558
82233	38130	Canada	2014	1901	8638;21351	3	6743	0_2_0_1_27_30_0_0_1_4_0	SRR2736279
82240	GCGS0413	USA	2004	8153	8644;50498;85555	3	6748	0_2_0_1_150_0_0_0_0_0_0	ERR1082158
82242	GCGS0415	USA	2004	8153	8646;50499;85556	3	6748	0_2_0_1_150_0_0_0_0_0_0	ERR1082161
82244	GCGS0475	USA	2013	1579	8648;21358;39257	3	6751	0_2_0_1_167_0_0_0_0_0_0	ERR1067820
82246	GCGS0490	USA	2004	1901	8650;21360;39258	3	6753	0_2_0_1_133_0_0_0_0_0_0	ERR1082168
82247	GCGS0491	USA	2004	1901	8651;21361	3	6754	0_2_0_1_134_0_0_0_0_0_0	ERR1067766
82248	GCGS0499	USA	2004	1901	8652;21362	3	6755	0_2_0_1_129_0_0_0_0_2_0	ERR1067770
82256	GCGS0625	USA	2002	1901	8660;21369	3	6763	0_2_0_1_129_0_0_3_0_0_0	ERR1067716
82258	GCGS0627	USA	2003	1901	8662;21371	3	6765	0_2_0_1_129_0_0_0_0_3_0	ERR1067734
[truncated: 1,936 more rows]
