# Supplementary material for: Neisseria gonorrhoeae LIN codes provide a robust, multi-resolution lineage nomenclature
Source: eLife. 2025 Dec 31;14:RP107758. doi: 10.7554/eLife.107758 (PMC12755878; doi:10.7554/eLife.107758)
Supplement: Supplementary file 4. — This table describes the loci excluded from v2 present in v1, and the loci added to v2 that were not included in v1. [file elife-107758-supp4.xlsx]

## Sheet: Sheet1
Loci present in Ng cgMLST v1 but excluded from Ng cgMLST v2				Additions to Ng cgMLST v2 not present in Ng cgMLST v1
Locus	Product			Locus	Product
NEIS0016	hypothetical protein/hydrolase			NEIS0101	hypothetical protein
NEIS0021	probable signal recognition particle protein cell division protein			NEIS0138	30S ribosomal protein S3
NEIS0035	PilT-like protein			NEIS0161	septum site-determining protein
NEIS0037	hypothetical protein			NEIS1028	hypothetical protein
NEIS0041	DNA transport competence protein			NEIS1549	nitrite reductase, major outer membrane copper-containing protein
NEIS0047	rfbB dTDP-glucose 4,6-dehydratase			NEIS1553	Lipid A phosphoethanolamine transferase
NEIS0093	periplasmic peptodase (bacteriocin resistance)			NEIS1630	hypothetical protein
NEIS0103	methionyl-tRNA formyltransferase			NEIS1684	aspartyl-tRNA synthetase
NEIS0108	SMF-family protein			NEIS1819	hypothetical protein
NEIS0110	DNA topoisomerase I			NEIS2131	hypothetical protein
NEIS0116	tuf			NEIS2142	putative periplasmic protein
NEIS0128	tuf			NEIS2545	hypothetical protein
NEIS0187	ribonuclease E
NEIS0202	pseudo
NEIS0205	putative inner membrane protein
NEIS0207	conserved hypothetical protein
NEIS0222	hypothetical protein
NEIS0224	bifunctional glutamine-synthetase adenylyltransferase/deadenyltransferase
NEIS0235	hypothetical protein
NEIS0236	hypothetical protein
NEIS0244	NADH dehydrogenase subunit G
NEIS0290	adenylosuccinate lyase
NEIS0291	LOS O-acetyltransferase
NEIS0292	conserved hypothetical protein
NEIS0308	hypothetical protein
NEIS0314	Maf-like protein
NEIS0338	ferric siderophore receptor protein
NEIS0340	ferric enterobactin transporter binding protein
NEIS0343	N-acetylglutamate synthase
NEIS0349	factor H binding protein lipoprotein
NEIS0352	1-deoxy-D-xylulose-5-phosphate synthase
NEIS0358	acetyl-CoA carboxylase biotin carboxyl carrier protein subunit
NEIS0361	hypothetical protein
NEIS0373	putative periplasmic thioredoxin
NEIS0380	O-acetyltransferase
NEIS0381	tyrosyl-tRNA synthetase
NEIS0383	isoleucyl-tRNA synthetase
NEIS0388	esterase
NEIS0394	hypothetical protein
NEIS0407	shikimate kinase
NEIS0408	type IV secretin protein
NEIS0415	ribosome biogenesis GTP-binding protein YsxC
NEIS0429	two-component system sensor kinase
NEIS0437	lipoprotein
NEIS0438	hypothetical protein
NEIS0466	hypothetical protein
NEIS0469	beta-hexosaminidase
NEIS0479	aromatic amino acid aminotransferase
NEIS0521	ABC transporter ATP-binding protein
NEIS0539	integral membrane protein
NEIS0541	Maf-like protein
NEIS0568	glycosyltransferase
NEIS0592	putative immunity protein
NEIS0596	MafA2 adhesin
NEIS0607	hypothetical protein
NEIS0608	hypothetical protein
NEIS0637	ribonuclease III
NEIS0648	dimethyladenosine transferase
NEIS0651	IgA1 protease
NEIS0652	competence protein
NEIS0667	hypothetical protein;
NEIS0668	cytochrome C
NEIS0715	cysteine synthase
NEIS0721	pilT_like protein
NEIS0728	hypothetical protein
NEIS0742	putative amino acid permease ATP-binding protein
NEIS0745	putative transmembrane transport protein
NEIS0752	hypothetical protein
NEIS0756	putative NAD(P)H-flavin oxidoreductase
NEIS0792	GTP-binding protein EngA
NEIS0795	putative periplasmic protein
NEIS0796	hypothetical protein
NEIS0807	putative periplasmic protein
NEIS0827	type IV biogenesis protein
NEIS0836	Phage integrase
NEIS0837	hypothetical protein
NEIS0921	5,10-methylenetetrahydrofolate reductase
NEIS0932	dihydrolipoamide succinyltransferase E2 component (EC 2.3.1.61)
NEIS0962	putative integral membrane protein
NEIS0982	Hypothetical protein
NEIS0986	hypothetical protein
NEIS1007	hypothetical protein
NEIS1032	gamma-glutamyl phosphate reductase
NEIS1068	putative oxidoreductase
NEIS1071	hypothetical protein
NEIS1088	hypothetical protein
NEIS1102	putative ribonuclease
NEIS1126	ABC transporter ATP-binding protein
NEIS1146	hypothetical protein
NEIS1170	putative P-type cation-transporting ATPase
NEIS1176	isopropylmalate isomerase large subunit
NEIS1178	putative lipoprotein
NEIS1201	hypothetical protein
NEIS1203	putative polysaccharide modification protein
NEIS1236	pseudo
NEIS1262	putative cation-transporting ATPase
NEIS1273	lipoprotein
NEIS1297	putative integral membrane transporter
NEIS1302	hypothetical protein
NEIS1305	hypothetical protein
NEIS1310	NgoAXII type III RMS; methylase modA
NEIS1320	DNA gyrase subunit A
NEIS1334	L-threonine 3-dehydrogenase (pseudogene)
NEIS1354	hypothetical protein
NEIS1363	putative aminopeptidase
NEIS1378	DNA mismatch repair protein
NEIS1401	putative transglycosylase
NEIS1404	hypothetical protein
NEIS1418	putative membrane peptidase
NEIS1426	putative integral membrane protein (CstA-like)
NEIS1447	acetate kinase
NEIS1452	hypothetical protein
NEIS1458	hypothetical protein
NEIS1516	putative polyamine permease substrate-binding protein
NEIS1548	nitric oxide reductase
NEIS1552	hypothetical protein
NEIS1577	guanosine-3',5'-bis(diphosphate) 3'-pyrophophohydrolase
NEIS1583	hypothetical protein
NEIS1594	glycine dehydrogenase
NEIS1633	drug efflux protein
NEIS1635	transcriptional regulator
NEIS1640	Cbb3-type cytochrome c oxidase subunit
NEIS1669	hypothetical protein
NEIS1689	putative polyamine permease substrate-binding protein
NEIS1690	Transferrin Binding Protein A
NEIS1691	Transferrin Binding Protein B
NEIS1695	hypothetical protein
NEIS1697	hypothetical protein
NEIS1727	acetate kinase
NEIS1733	2-methylisocitrate lyase
NEIS1735	putative permease
NEIS1750	hypothetical protein
NEIS1764	hypothetical protein
NEIS1766	bifunctional proline dehydrogenase/pyrroline-5-carboxylate dehydrogenase
NEIS1789	MafA adhesin
NEIS1795	MafI immunity protein
NEIS1796	hypothetical protein
NEIS1801	hypothetical protein
NEIS1853	multidrug resistance translocase; fatty acid efflux system protein
NEIS1903	glycyl-tRNA synthetase subunit beta
NEIS1922	hypothetical protein
NEIS1926	putative inner membrane protein
NEIS1927	cadmium resistance protein
NEIS1945	hypothetical protein
NEIS1946	haemoglobin-haptoglobin utilisation protein
NEIS1958	hypothetical protein
NEIS1959	IgA-specific serine endopeptidase
NEIS1966	putative inner membrane transport protein
NEIS1983	hypothetical protein
NEIS1987	putative DNA helicase
NEIS1990	NgoAXIV type II RMS; very short patch repair protein
NEIS1995	minor pilin
NEIS2006	gluconate permease
NEIS2009	3-demethylubiquinone-9 3-methyltransferase
NEIS2012	O-6 PEA LOS transferase
NEIS2016	hypothetical protein
NEIS2103	putative protease
NEIS2109	putative periplasmic protein
NEIS2118	lipoprotein
NEIS2135	putative nicotinamidase
NEIS2139	acetyltransferase
NEIS2140	putative periplasmic protein
NEIS2361	NgoAV type I RMS; hsdM; DNA methyltransferase subunit M
NEIS2362	NgoAV type I RMS; hsdS; specificity subunit S
NEIS2393	hypothetical protein
NEIS2462	hypothetical protein
NEIS2534	NgoAXVII type I RMS; hsdR; restriction-modifcation system R protein
NEIS2535	NgoAXVII type I RMS; hsdS; specificity subunit S protein
NEIS2573	hypothetical protein
NEIS2578	putative immunity protein
NEIS2598	hypothetical protein
NEIS2600	hypothetical protein
NEIS2604	hypothetical protein, putative phage associated protein
NEIS2605	hypothetical protein, putative phage associated protein
NEIS2606	hypothetical protein, putative phage associated protein
NEIS2607	hypothetical protein, putative phage associated protein
NEIS2608	hypothetical protein, putative phage associated protein
NEIS2609	hypothetical protein, putative phage associated protein
NEIS2610	hypothetical protein, putative phage associated protein
NEIS2611	hypothetical protein, putative phage associated protein
NEIS2612	hypothetical protein, putative phage associated protein
NEIS2613	phage-related repressor protein
NEIS2614	hypothetical protein, putative phage associated protein
NEIS2617	hypothetical protein, putative phage associated protein
NEIS2620	hypothetical protein, putative phage associated protein
NEIS2624	hypothetical protein, putative phage associated protein
NEIS2625	hypothetical protein, putative phage associated protein
NEIS2631	hypothetical protein, putative phage associated protein
NEIS2636	hypothetical protein, putative phage associated protein
NEIS2637	hypothetical protein, putative phage associated protein
NEIS2651	hypothetical protein
NEIS2653	hypothetical protein
NEIS2654	hypothetical protein
NEIS2655	hypothetical protein
NEIS2656	hypothetical protein
NEIS2657	conserved hypothetical protein
NEIS2659	hypothetical protein
NEIS2661	hypothetical protein
NEIS2667	putative oxidoreductase
NEIS2671	putative phage associated protein
NEIS2676	putative phage associated protein
NEIS2677	putative phage associated protein
NEIS2678	putative phage associated protein
NEIS2679	putative phage associated protein
NEIS2680	putative phage associated protein
NEIS2682	putative phage associated protein
NEIS2683	putative phage associated protein
NEIS2684	putative phage associated protein
NEIS2685	putative phage associated protein
NEIS2689	hypothetical protein
NEIS2694	hypothetical protein
NEIS2699	hypothetical protein
NEIS2701	putative ABC transporter, ATP-binding protein
NEIS2709	putative phage associated protein
NEIS2710	putative phage associated protein
NEIS2711	putative phage associated protein
NEIS2712	phage associated protein
NEIS2715	hypothetical protein
NEIS2716	phage associated protein
NEIS2719	phage associated protein
NEIS2723	hypothetical protein
NEIS2731	amino acid ABC transporter substrate-binding protein
NEIS2732	hypothetical protein
NEIS2733	hypothetical protein
NEIS2735	polyphosphate kinase
NEIS2770	hypothetical protein
NEIS2773	Adenosine monophosphate-protein transferase and cysteine protease IbpA precursor
NEIS2775	AP2 domain protein
NEIS2846	glycosyltransferase
NEIS2883	hypothetical protein
NEIS2934	hypothetical protein
