# Supplementary material for: Neisseria gonorrhoeae LIN codes provide a robust, multi-resolution lineage nomenclature
Source: eLife. 2025 Dec 31;14:RP107758. doi: 10.7554/eLife.107758 (PMC12755878; doi:10.7554/eLife.107758)
Supplement: Supplementary file 5. [file elife-107758-supp5.xlsx]

## Sheet: Sheet1
MLST-ST	Count of lineage		NG-STAR CC	Count of sublineage		NG-MAST-ST	Count of group
Lineage			Sublineage			Group
1901	2376		63	1437		1407	767
0_0_12	443		0_0_1_0	14		0_0_26_3_52	2
0_0_8	1		0_2_1_0	1369		0_18_13_0_16	2
0_2_0	1932		0_2_1_1	7		0_2_0_1_0	498
7363	1322		0_2_1_17	1		0_2_0_1_10	1
0_0_18	3		0_2_1_26	1		0_2_0_1_11	1
0_0_23	1		0_2_1_3	5		0_2_0_1_12	2
0_0_46	2		0_2_1_4	2		0_2_0_1_14	29
0_0_52	796		0_2_1_9	7		0_2_0_1_19	2
0_0_78	1		0_2_11_0	1		0_2_0_1_197	1
0_12_4	1		0_2_2_0	8		0_2_0_1_2	1
0_18_22	3		0_2_45_3	1		0_2_0_1_224	1
0_18_23	3		1_1_22_9	21		0_2_0_1_23	1
0_2_17	355		90	1562		0_2_0_1_232	2
0_2_21	1		0_0_12_2	25		0_2_0_1_244	1
0_2_28	6		0_0_47_0	2		0_2_0_1_254	3
0_2_34	1		0_0_47_2	1		0_2_0_1_257	1
0_2_44	60		0_2_0_0	7		0_2_0_1_260	1
0_2_53	1		0_2_0_1	1499		0_2_0_1_27	77
0_2_7	1		0_2_0_16	1		0_2_0_1_28	1
0_2_9	1		0_2_0_3	1		0_2_0_1_3	1
0_28_0	1		0_2_0_30	1		0_2_0_1_31	1
0_7_0	46		0_2_15_0	1		0_2_0_1_32	3
0_7_1	1		0_2_17_0	11		0_2_0_1_33	1
1_1_17	4		0_2_43_1	9		0_2_0_1_35	50
1_1_2	4		1_1_17_6	4		0_2_0_1_40	1
1_1_3	3		Grand Total	2999		0_2_0_1_41	1
1_12_0	1					0_2_0_1_42	1
15_0_0	1					0_2_0_1_5	1
16_1_0	24					0_2_0_1_51	5
5_1_0	1					0_2_0_1_52	2
Grand Total	3698					0_2_0_1_55	32
						0_2_0_1_58	2
						0_2_0_1_66	5
						0_2_0_1_68	2
						0_2_0_1_69	31
						0_2_0_1_71	1
						2992	653
						0_2_1_0_102	3
						0_2_1_0_103	1
						0_2_1_0_111	3
						0_2_1_0_116	1
						0_2_1_0_118	3
						0_2_1_0_119	3
						0_2_1_0_120	1
						0_2_1_0_122	2
						0_2_1_0_124	4
						0_2_1_0_127	2
						0_2_1_0_137	1
						0_2_1_0_143	1
						0_2_1_0_148	1
						0_2_1_0_149	1
						0_2_1_0_159	1
						0_2_1_0_161	2
						0_2_1_0_183	32
						0_2_1_0_185	27
						0_2_1_0_186	11
						0_2_1_0_187	1
						0_2_1_0_189	2
						0_2_1_0_205	6
						0_2_1_0_206	11
						0_2_1_0_208	1
						0_2_1_0_227	1
						0_2_1_0_249	1
						0_2_1_0_253	1
						0_2_1_0_270	1
						0_2_1_0_276	1
						0_2_1_0_280	4
						0_2_1_0_309	1
						0_2_1_0_337	4
						0_2_1_0_383	2
						0_2_1_0_69	1
						0_2_1_0_73	409
						0_2_1_0_79	6
						0_2_1_0_81	9
						0_2_1_0_84	1
						0_2_1_0_85	2
						0_2_1_0_94	2
						0_2_1_1_0	7
						0_2_1_1_14	1
						0_2_1_1_4	72
						0_2_1_1_5	4
						0_2_1_1_6	1
						0_2_1_1_7	1
						Grand Total	1420
