# Supplementary material for: Neisseria gonorrhoeae LIN codes provide a robust, multi-resolution lineage nomenclature
Source: eLife. 2025 Dec 31;14:RP107758. doi: 10.7554/eLife.107758 (PMC12755878; doi:10.7554/eLife.107758)
Supplement: Supplementary file 6. — This table demonstrates that type 34 penA variants are associated with LIN lineage 266. [file elife-107758-supp6.xlsx]

## Sheet: Sheet1
id	Lineage	NEIS1753 (penA)	Mosaic type
27282	0_2_0	266	Type 34
27284	0_2_0	266	Type 34
27287	0_2_0	266	Type 34
27288	0_2_0	266	Type 34
27289	0_2_0	266	Type 34
27290	0_2_1	266	Type 34
27291	0_2_0	266	Type 34
27294	0_2_1	266	Type 34
27296	0_2_0	266	Type 34
27298	0_2_0	266	Type 34
27299	0_2_0	266	Type 34
27301	0_2_0	266	Type 34
27304	0_2_1	266	Type 34
27305	0_2_1	266	Type 34
27306	0_2_0	266	Type 34
27308	0_2_0	266	Type 34
27309	0_2_0	266	Type 34
27310	0_2_0	266	Type 34
27311	0_2_1	266	Type 34
27312	0_2_0	266	Type 34
27313	0_2_0	266	Type 34
27314	0_2_0	266	Type 34
27315	0_2_0	266	Type 34
27316	0_2_0	266	Type 34
27317	0_2_0	266	Type 34
27318	0_2_0	266	Type 34
27321	0_2_1	266	Type 34
27323	0_2_0	266	Type 34
27324	0_2_0	266	Type 34
27326	0_2_0	266	Type 34
27328	0_2_0	266	Type 34
27329	0_2_0	266	Type 34
27330	0_2_0	266	Type 34
27331	0_2_0	266	Type 34
27332	0_2_1	266	Type 34
27335	0_2_0	266	Type 34
27336	0_2_0	266	Type 34
27337	0_2_0	266	Type 34
27338	0_2_1	266	Type 34
27339	0_2_1	266	Type 34
27341	0_2_0	266	Type 34
27344	0_2_1	266	Type 34
27345	0_2_0	266	Type 34
27346	0_2_0	266	Type 34
27348	0_2_1	266	Type 34
27350	0_2_0	266	Type 34
27351	0_2_1	266	Type 34
27352	0_2_0	266	Type 34
27354	0_2_1	266	Type 34
27355	0_2_0	266	Type 34
27356	0_2_0	266	Type 34
27357	0_2_0	266	Type 34
27358	0_2_0	266	Type 34
27359	0_2_0	266	Type 34
27360	0_2_0	266	Type 34
27362	0_2_0	266	Type 34
27363	0_2_0	266	Type 34
27367	0_2_0	266	Type 34
27368	0_2_0	266	Type 34
27369	0_2_0	266	Type 34
27370	0_2_0	266	Type 34
27371	0_2_1	266	Type 34
27373	0_2_0	266	Type 34
27374	0_2_0	266	Type 34
27375	0_2_0	266	Type 34
27376	0_2_1	266	Type 34
27377	0_2_1	266	Type 34
27378	0_2_1	266	Type 34
27379	0_2_0	266	Type 34
27381	0_2_0	266	Type 34
27382	0_2_0	266	Type 34
27385	0_2_0	266	Type 34
27386	0_2_0	266	Type 34
27387	0_2_0	266	Type 34
27388	0_2_0	266	Type 34
27389	0_2_0	266	Type 34
27390	0_2_0	266	Type 34
27391	0_2_0	266	Type 34
27392	0_2_0	266	Type 34
27393	0_2_0	266	Type 34
27394	0_2_0	266	Type 34
27396	0_2_1	266	Type 34
27397	0_2_0	266	Type 34
27398	0_2_0	266	Type 34
27399	0_2_0	266	Type 34
27400	0_2_0	266	Type 34
27401	0_2_0	266	Type 34
27402	0_2_1	266	Type 34
27403	0_2_1	266	Type 34
27406	0_2_0	266	Type 34
27407	0_2_1	266	Type 34
27408	0_2_1	266	Type 34
27409	0_2_1	266	Type 34
27412	0_2_1	266	Type 34
27413	0_2_0	266	Type 34
27414	0_2_0	266	Type 34
27416	0_2_0	266	Type 34
27417	0_2_0	266	Type 34
27418	0_2_0	266	Type 34
27419	0_2_1	266	Type 34
27421	0_2_0	266	Type 34
27423	0_2_0	266	Type 34
27427	0_2_0	266	Type 34
27429	0_2_0	266	Type 34
27430	0_2_0	266	Type 34
27433	0_2_0	266	Type 34
27436	0_2_1	266	Type 34
27440	0_2_0	266	Type 34
27443	0_2_0	266	Type 34
27444	0_2_0	266	Type 34
27446	0_2_0	266	Type 34
27447	0_2_0	266	Type 34
27448	0_2_0	266	Type 34
27449	0_2_0	266	Type 34
27452	0_2_0	266	Type 34
27453	0_2_0	266	Type 34
27454	0_2_0	266	Type 34
27462	0_2_0	266	Type 34
27469	0_2_0	266	Type 34
27470	0_2_0	266	Type 34
27473	0_2_0	266	Type 34
31178	0_2_0	266	Type 34
31458	0_2_0	266	Type 34
31459	0_2_0	266	Type 34
31462	0_2_0	266	Type 34
31494	0_2_0	266	Type 34
31495	0_2_0	266	Type 34
31503	0_2_0	266	Type 34
31504	0_2_0	498	Type 34
31508	0_2_0	266	Type 34
31513	0_2_0	266	Type 34
31514	0_2_0	266	Type 34
31515	0_2_0	266	Type 34
31516	0_2_0	266	Type 34
31599	0_2_0	266	Type 34
31601	0_2_0	266	Type 34
31605	0_2_0	266	Type 34
31618	0_2_0	266	Type 34
31619	0_2_0	266	Type 34
31623	0_2_0	266	Type 34
31634	0_2_0	266	Type 34
31645	0_2_0	266	Type 34
31647	0_2_0	266	Type 34
31648	0_2_0	266	Type 34
31649	0_2_0	266	Type 34
31652	0_2_0	266	Type 34
31656	0_2_0	266	Type 34
31658	0_2_0	266	Type 34
31659	0_2_0	266	Type 34
31660	0_2_0	266	Type 34
31704	0_2_0	266	Type 34
31734	0_2_0	266	Type 34
31776	0_2_0	266	Type 34
31784	0_2_0	266	Type 34
31865	0_2_0	266	Type 34
31917	0_2_0	266	Type 34
34769	0_2_0	266	Type 34
34775	0_2_0	498	Type 34
34793	0_2_0	266	Type 34
34795	0_2_0	498	Type 34
36684	0_2_0	266	Type 34
37023	0_2_0	266	Type 34
37024	0_2_0	266	Type 34
37027	0_2_0	266	Type 34
37028	0_2_0	266	Type 34
37034	0_2_0	660	Type 34
37035	0_2_0	266	Type 34
37037	0_2_0	266	Type 34
37038	0_2_0	266	Type 34
37039	0_2_0	266	Type 34
37040	0_2_0	266	Type 34
37041	0_2_0	266	Type 34
37042	0_2_0	266	Type 34
37043	0_2_0	266	Type 34
37044	0_2_0	266	Type 34
37046	0_2_0	266	Type 34
37047	0_2_0	266	Type 34
37048	0_2_0	266	Type 34
37050	0_2_0	266	Type 34
37051	0_2_0	266	Type 34
37052	0_2_0	266	Type 34
37053	0_2_0	266	Type 34
37054	0_2_0	266	Type 34
37055	0_2_0	266	Type 34
37056	0_2_0	266	Type 34
37057	0_2_0	266	Type 34
37058	0_2_0	266	Type 34
37059	0_2_0	266	Type 34
37060	0_2_0	266	Type 34
37061	0_2_0	266	Type 34
37062	0_2_0	266	Type 34
37063	0_2_0	266	Type 34
37064	0_2_0	266	Type 34
37065	0_2_0	266	Type 34
37067	0_2_0	266	Type 34
37068	0_2_0	266	Type 34
37070	0_2_0	266	Type 34
37071	0_2_0	266	Type 34
37072	0_2_0	266	Type 34
37073	0_2_0	266	Type 34
37074	0_2_0	266	Type 34
37075	0_2_0	266	Type 34
37076	0_2_0	266	Type 34
37077	0_2_0	266	Type 34
37078	0_2_0	266	Type 34
37079	0_2_0	266	Type 34
37080	0_2_0	266	Type 34
37081	0_2_0	266	Type 34
37082	0_2_0	266	Type 34
37083	0_2_0	266	Type 34
37084	0_2_0	266	Type 34
37085	0_2_0	266	Type 34
37086	0_2_0	266	Type 34
37087	0_2_0	266	Type 34
37088	0_2_0	266	Type 34
37089	0_2_0	266	Type 34
37090	0_2_0	266	Type 34
37091	0_2_0	266	Type 34
37092	0_2_0	266	Type 34
37106	0_2_0	266	Type 34
37151	0_2_0	266	Type 34
37166	0_2_0	266	Type 34
37211	0_2_0	266	Type 34
37266	0_2_0	266	Type 34
37267	0_2_0	266	Type 34
37268	0_2_0	266	Type 34
37269	0_2_0	266	Type 34
37272	0_2_0	266	Type 34
37273	0_2_0	266	Type 34
37283	0_2_0	266	Type 34
37294	0_2_0	266	Type 34
37300	0_2_0	266	Type 34
37377	0_2_0	266	Type 34
37380	0_2_0	266	Type 34
37381	0_2_0	266	Type 34
37382	0_2_0	266	Type 34
37387	0_2_0	266	Type 34
37388	0_2_0	266	Type 34
37389	0_2_0	266	Type 34
37392	0_2_1	266	Type 34
37400	0_2_0	266	Type 34
37421	0_2_0	266	Type 34
37422	0_2_1	266	Type 34
37424	0_2_0	266	Type 34
37425	0_2_0	266	Type 34
37426	0_2_0	266	Type 34
37427	0_2_0	266	Type 34
37428	0_2_0	266	Type 34
37429	0_2_0	266	Type 34
37430	0_2_0	266	Type 34
37431	0_2_0	266	Type 34
37432	0_2_0	266	Type 34
37433	0_2_0	266	Type 34
37434	0_2_0	266	Type 34
37435	0_2_0	266	Type 34
37436	0_2_0	266	Type 34
37437	0_2_0	266	Type 34
37438	0_2_0	266	Type 34
37439	0_2_0	266	Type 34
37440	0_2_0	266	Type 34
37441	0_2_0	266	Type 34
37443	0_2_0	266	Type 34
37444	0_2_0	266	Type 34
37446	0_2_0	266	Type 34
37450	0_2_0	266	Type 34
37464	0_2_1	266	Type 34
37465	0_2_1	266	Type 34
37468	0_2_0	266	Type 34
37474	0_2_0	266	Type 34
37475	0_2_0	266	Type 34
37477	0_2_0	266	Type 34
37479	0_2_0	266	Type 34
37480	0_2_0	266	Type 34
37484	0_2_0	266	Type 34
37488	0_2_0	266	Type 34
37489	0_2_0	266	Type 34
37498	0_2_0	266	Type 34
37500	0_2_0	266	Type 34
37508	0_2_0	266	Type 34
37515	0_2_0	266	Type 34
37541	0_2_0	266	Type 34
37542	0_2_0	266	Type 34
37550	0_2_0	266	Type 34
37554	0_2_0	266	Type 34
37555	0_2_0	266	Type 34
37556	0_2_0	266	Type 34
37557	0_2_0	266	Type 34
37558	0_2_0	266	Type 34
37559	0_2_0	266	Type 34
37560	0_2_0	266	Type 34
37561	0_2_0	266	Type 34
37562	0_2_0	266	Type 34
37563	0_2_0	266	Type 34
37564	0_2_0	266	Type 34
37565	0_2_0	266	Type 34
37566	0_2_1	266	Type 34
37567	0_2_1	266	Type 34
37568	0_2_0	266	Type 34
37569	0_2_0	266	Type 34
37570	0_2_0	266	Type 34
37571	0_2_0	266	Type 34
37572	0_2_0	266	Type 34
37573	0_2_0	266	Type 34
37574	0_2_0	266	Type 34
37576	0_2_0	266	Type 34
37577	0_2_0	266	Type 34
37578	0_2_0	266	Type 34
37579	0_2_0	266	Type 34
37581	0_2_0	266	Type 34
37583	0_2_0	266	Type 34
37584	0_2_0	266	Type 34
37586	0_2_0	266	Type 34
37587	0_2_0	266	Type 34
37588	0_2_0	266	Type 34
37589	0_2_0	266	Type 34
37590	0_2_0	266	Type 34
41203	0_2_0	266	Type 34
41204	0_2_0	266	Type 34
41206	0_2_0	266	Type 34
41906	0_2_0	266	Type 34
41914	0_2_0	266	Type 34
45037	0_2_0	266	Type 34
45041	0_2_0	266	Type 34
45044	0_2_0	266	Type 34
46273	0_2_0	266	Type 34
46285	0_2_0	266	Type 34
46844	0_2_0	266	Type 34
46845	0_2_0	266	Type 34
46869	0_2_0	266	Type 34
46895	0_2_0	266	Type 34
46927	0_2_0	266	Type 34
46937	0_2_0	266	Type 34
46945	0_2_0	266	Type 34
47352	0_2_0	266	Type 34
47366	0_2_0	266	Type 34
47412	0_2_0	266	Type 34
47472	0_2_0	266	Type 34
47486	0_2_0	266	Type 34
47510	0_2_0	266	Type 34
47515	0_2_0	266	Type 34
47517	0_2_0	266	Type 34
47519	0_2_0	266	Type 34
47527	0_2_0	266	Type 34
47540	0_2_0	266	Type 34
47545	0_2_0	266	Type 34
47552	0_2_0	266	Type 34
47554	0_2_0	266	Type 34
47558	0_2_0	266	Type 34
47579	0_2_0	266	Type 34
47602	0_2_0	266	Type 34
47607	0_2_0	266	Type 34
47634	0_2_0	266	Type 34
47639	0_2_0	266	Type 34
47646	0_2_0	266	Type 34
47658	0_2_0	266	Type 34
47660	0_2_0	266	Type 34
47665	0_2_0	266	Type 34
47671	0_2_0	266	Type 34
47692	0_2_0	266	Type 34
47696	0_2_0	266	Type 34
47702	0_2_0	266	Type 34
47706	0_2_0	266	Type 34
47714	0_2_0	266	Type 34
47721	0_2_0	266	Type 34
47725	0_2_0	266	Type 34
47762	0_2_0	1240	Type 34
47767	0_2_0	266	Type 34
47769	0_2_0	266	Type 34
47772	0_2_0	266	Type 34
47799	0_2_0	266	Type 34
47815	0_2_0	266	Type 34
47831	0_2_0	266	Type 34
47832	0_2_0	266	Type 34
47841	0_2_0	266	Type 34
47855	0_2_0	266	Type 34
47875	0_2_0	1240	Type 34
47883	0_2_0	266	Type 34
47886	0_2_0	266	Type 34
47903	0_2_0	266	Type 34
47906	0_2_0	266	Type 34
47912	0_2_0	266	Type 34
47960	0_2_0	266	Type 34
47962	0_2_0	266	Type 34
47969	0_2_0	266	Type 34
47972	0_2_0	266	Type 34
48000	0_2_0	266	Type 34
48012	0_2_0	266	Type 34
48026	0_2_0	266	Type 34
48037	0_2_0	266	Type 34
48043	0_2_0	266	Type 34
48046	0_2_0	266	Type 34
48061	0_2_0	266	Type 34
48062	0_2_0	266	Type 34
48064	0_2_0	266	Type 34
48068	0_2_0	266	Type 34
48076	0_2_0	266	Type 34
48079	0_2_0	266	Type 34
48087	0_2_0	266	Type 34
48100	0_2_0	266	Type 34
48101	0_2_0	266	Type 34
48104	0_2_0	266	Type 34
48106	0_2_0	266	Type 34
48111	0_2_0	266	Type 34
48116	0_2_0	266	Type 34
48118	0_2_0	266	Type 34
48127	0_2_0	266	Type 34
48131	0_2_0	266	Type 34
48191	0_2_0	266	Type 34
48221	0_2_0	266	Type 34
48231	0_2_1	266	Type 34
48320	0_2_0	266	Type 34
48331	0_2_0	266	Type 34
48336	0_2_0	266	Type 34
48348	0_2_0	266	Type 34
48354	0_2_0	266	Type 34
48355	0_2_0	266	Type 34
48358	0_2_0	266	Type 34
48363	0_2_0	266	Type 34
48365	0_2_0	266	Type 34
48372	0_2_0	266	Type 34
48375	0_2_0	266	Type 34
48385	0_2_0	266	Type 34
48386	0_2_0	266	Type 34
48391	0_2_0	266	Type 34
48398	0_2_0	266	Type 34
48411	0_2_0	266	Type 34
48419	0_2_0	266	Type 34
48421	0_2_0	266	Type 34
48428	0_2_0	266	Type 34
48434	0_2_0	266	Type 34
48438	0_2_0	266	Type 34
48443	0_2_0	266	Type 34
48453	0_2_0	266	Type 34
48454	0_2_0	266	Type 34
48456	0_2_0	266	Type 34
48464	0_2_0	266	Type 34
48465	0_2_0	266	Type 34
48476	0_2_0	266	Type 34
48480	0_2_0	266	Type 34
48491	0_2_0	266	Type 34
48493	0_2_0	1240	Type 34
48494	0_2_1	266	Type 34
48495	0_2_0	266	Type 34
48497	0_2_0	266	Type 34
48498	0_2_0	266	Type 34
48502	0_2_0	266	Type 34
48505	0_2_0	266	Type 34
48509	0_2_0	266	Type 34
48514	0_2_0	266	Type 34
48515	0_2_0	266	Type 34
48524	0_2_0	266	Type 34
48527	0_2_0	266	Type 34
48530	0_2_0	266	Type 34
48626	0_2_0	266	Type 34
48630	0_2_0	266	Type 34
48642	0_2_0	266	Type 34
48647	0_2_0	266	Type 34
48659	0_2_0	266	Type 34
48672	0_2_0	266	Type 34
48673	0_2_0	266	Type 34
48700	0_2_0	266	Type 34
48716	0_2_0	266	Type 34
48723	0_2_0	266	Type 34
48726	0_2_0	266	Type 34
48732	0_2_0	266	Type 34
48733	0_2_0	266	Type 34
48737	0_2_0	266	Type 34
48742	0_2_0	266	Type 34
48745	0_2_0	266	Type 34
48756	0_2_0	266	Type 34
48761	0_2_0	266	Type 34
48771	0_2_0	266	Type 34
48838	0_2_0	266	Type 34
48839	0_2_0	266	Type 34
48859	0_2_0	266	Type 34
48869	0_2_0	266	Type 34
48874	0_2_0	266	Type 34
48894	0_2_0	266	Type 34
48901	0_2_0	266	Type 34
48961	0_2_0	266	Type 34
48963	0_2_0	266	Type 34
48966	0_2_0	266	Type 34
48981	0_2_0	266	Type 34
49002	0_2_0	266	Type 34
49026	0_2_0	266	Type 34
49029	0_2_0	266	Type 34
49033	0_2_0	266	Type 34
49043	0_2_0	266	Type 34
49046	0_2_0	266	Type 34
49058	0_2_0	266	Type 34
49059	0_2_0	266	Type 34
49083	0_2_0	266	Type 34
49087	0_2_0	266	Type 34
49132	0_2_0	266	Type 34
49145	0_2_0	266	Type 34
49166	0_2_0	266	Type 34
49172	0_2_0	266	Type 34
49173	0_2_0	266	Type 34
49183	0_2_0	266	Type 34
49187	0_2_0	266	Type 34
49198	0_2_0	266	Type 34
49205	0_2_0	266	Type 34
49208	0_2_0	266	Type 34
49215	0_2_0	266	Type 34
50472	0_2_0	266	Type 34
50474	0_2_0	266	Type 34
50492	0_2_0	266	Type 34
50512	0_2_0	266	Type 34
51101	0_2_0	266	Type 34
51103	0_2_0	266	Type 34
51106	0_2_0	266	Type 34
51116	0_2_0	266	Type 34
51665	0_2_0	266	Type 34
51680	0_2_0	266	Type 34
51681	0_2_0	266	Type 34
51697	0_2_0	266	Type 34
51722	0_2_0	266	Type 34
51737	1_8_6	1503	Type 34
51741	0_2_0	266	Type 34
51757	0_2_0	266	Type 34
51761	0_2_0	266	Type 34
51768	1_8_6	1503	Type 34
51787	0_2_0	266	Type 34
51893	0_2_0	266	Type 34
52155	0_2_0	266	Type 34
53473	0_2_0	266	Type 34
53548	0_2_0	266	Type 34
53555	0_2_0	266	Type 34
53559	0_2_0	266	Type 34
53567	0_2_0	266	Type 34
53592	0_2_0	266	Type 34
53632	0_2_0	266	Type 34
54297	0_2_0	266	Type 34
54309	0_2_0	266	Type 34
54341	0_2_0	266	Type 34
54351	0_2_0	266	Type 34
54363	0_2_0	266	Type 34
54382	0_2_0	266	Type 34
56160	0_2_0	266	Type 34
56175	0_2_0	266	Type 34
56199	0_2_0	266	Type 34
57095	0_2_0	266	Type 34
57099	0_2_0	266	Type 34
57110	1_8_6	1503	Type 34
58866	0_2_0	266	Type 34
58867	0_2_0	266	Type 34
60478	0_2_0	266	Type 34
60479	0_2_0	266	Type 34
60480	0_2_0	266	Type 34
60481	0_2_0	266	Type 34
60487	0_2_0	266	Type 34
60488	0_2_0	266	Type 34
60495	0_2_0	266	Type 34
60498	0_2_0	266	Type 34
60499	0_2_0	266	Type 34
60500	0_2_0	266	Type 34
61345	0_2_17	266	Type 34
61811	0_2_0	266	Type 34
71995	0_0_30	266	Type 34
72018	0_7_0	1526	Type 34
74374	0_2_0	266	Type 34
74379	0_2_0	266	Type 34
74434	0_2_0	266	Type 34
74484	0_2_0	266	Type 34
74492	1_1_17	266	Type 34
74503	1_8_6	1503	Type 34
74517	0_2_0	266	Type 34
74519	1_8_6	1503	Type 34
74520	1_8_6	1503	Type 34
74521	0_2_0	266	Type 34
74535	1_8_6	1503	Type 34
74539	0_2_1	266	Type 34
75586	0_2_0	266	Type 34
75912	0_2_0	266	Type 34
75916	0_2_0	266	Type 34
75932	0_2_0	266	Type 34
75939	0_2_0	266	Type 34
75942	0_2_0	266	Type 34
75943	0_2_0	266	Type 34
75944	0_2_0	266	Type 34
75948	0_2_0	266	Type 34
75951	0_2_0	266	Type 34
75962	0_2_0	266	Type 34
75986	0_2_0	266	Type 34
76196	0_2_0	266	Type 34
76197	0_2_0	266	Type 34
76198	0_2_0	266	Type 34
76228	0_2_0	266	Type 34
76229	0_2_0	266	Type 34
76231	0_2_0	266	Type 34
76232	0_2_0	266	Type 34
76233	0_2_0	266	Type 34
76234	0_2_0	266	Type 34
76235	0_2_0	266	Type 34
76236	0_2_0	266	Type 34
76237	0_2_0	266	Type 34
76240	0_2_0	266	Type 34
76242	0_2_0	266	Type 34
76243	0_2_0	266	Type 34
76244	0_2_0	266	Type 34
76246	0_2_0	266	Type 34
76247	0_2_0	266	Type 34
76248	0_2_0	266	Type 34
76256	0_2_0	266	Type 34
76259	0_2_0	266	Type 34
76263	0_2_0	266	Type 34
76279	0_2_0	266	Type 34
76280	0_2_0	266	Type 34
76284	0_2_0	266	Type 34
76287	0_2_0	266	Type 34
76288	0_2_0	266	Type 34
76289	0_2_0	266	Type 34
76356	0_2_0	266	Type 34
76469	0_2_0	266	Type 34
76513	0_2_0	266	Type 34
77399	0_2_0	266	Type 34
77444	0_7_0	1526	Type 34
77450	0_2_0	266	Type 34
77943	0_2_0	266	Type 34
78499	0_2_0	266	Type 34
78501	0_2_0	266	Type 34
78502	0_2_0	266	Type 34
78513	0_2_0	266	Type 34
78521	0_2_0	266	Type 34
78522	0_2_0	266	Type 34
78523	0_2_0	266	Type 34
78526	0_2_0	266	Type 34
78528	0_2_0	1240	Type 34
78531	0_2_0	266	Type 34
78533	0_2_0	266	Type 34
78534	0_2_0	266	Type 34
78535	0_2_0	266	Type 34
78537	0_2_0	266	Type 34
78538	0_2_0	266	Type 34
78540	0_2_0	266	Type 34
78541	0_2_0	266	Type 34
78544	0_2_0	266	Type 34
78551	0_2_0	266	Type 34
78552	0_2_0	266	Type 34
78554	0_2_0	266	Type 34
78563	0_2_0	266	Type 34
78565	0_2_0	266	Type 34
78566	0_2_0	266	Type 34
78567	0_2_0	266	Type 34
78568	0_2_0	266	Type 34
78569	0_2_0	266	Type 34
78570	0_2_0	266	Type 34
78571	0_2_0	266	Type 34
78573	0_2_0	266	Type 34
78574	0_2_0	266	Type 34
78579	0_2_0	266	Type 34
78587	0_2_0	266	Type 34
78588	0_2_0	266	Type 34
78589	0_2_0	266	Type 34
78590	0_2_0	266	Type 34
78591	0_2_0	266	Type 34
78592	0_2_0	266	Type 34
78593	0_2_0	266	Type 34
78595	0_2_0	266	Type 34
78599	0_2_0	266	Type 34
78600	0_2_0	266	Type 34
78609	0_2_0	266	Type 34
78613	0_2_0	266	Type 34
78614	0_2_0	266	Type 34
78616	0_2_0	1240	Type 34
78617	0_2_0	266	Type 34
78619	0_2_0	266	Type 34
78622	0_2_0	1240	Type 34
78623	0_2_0	266	Type 34
78625	0_2_0	266	Type 34
78626	0_2_0	266	Type 34
78630	0_2_0	1240	Type 34
78722	0_2_0	266	Type 34
78725	0_2_0	266	Type 34
78726	0_2_0	266	Type 34
78729	0_2_0	266	Type 34
78737	0_2_0	266	Type 34
78924	0_2_0	266	Type 34
78925	0_0_33	266	Type 34
78944	0_0_33	266	Type 34
78951	0_0_33	266	Type 34
78957	0_2_0	266	Type 34
78961	0_2_0	266	Type 34
78970	0_2_0	266	Type 34
78999	0_2_0	266	Type 34
79014	0_2_0	266	Type 34
79015	0_2_0	266	Type 34
79017	0_2_0	266	Type 34
79069	0_2_0	266	Type 34
82230	0_2_0	266	Type 34
82231	0_2_0	266	Type 34
82233	0_2_0	266	Type 34
82274	0_2_0	266	Type 34
82284	0_2_0	266	Type 34
82285	0_2_0	266	Type 34
82286	0_2_0	266	Type 34
82287	0_2_0	266	Type 34
82288	0_2_0	266	Type 34
82289	0_2_0	266	Type 34
82290	0_2_0	266	Type 34
82291	0_2_0	2546	Type 34
82292	0_2_0	266	Type 34
82293	0_2_0	266	Type 34
82294	0_2_0	266	Type 34
82295	0_2_0	266	Type 34
82296	0_2_0	266	Type 34
82297	0_2_0	266	Type 34
82298	0_2_0	266	Type 34
82299	0_2_0	266	Type 34
82300	0_2_0	266	Type 34
82301	0_2_0	266	Type 34
82302	0_2_0	266	Type 34
82303	0_2_0	266	Type 34
82304	0_2_0	266	Type 34
82305	0_2_0	266	Type 34
82306	0_2_0	266	Type 34
82307	0_2_0	266	Type 34
82308	0_2_0	266	Type 34
82309	0_2_0	266	Type 34
82315	0_2_0	266	Type 34
82364	0_2_0	266	Type 34
82365	0_2_0	266	Type 34
82382	0_2_0	266	Type 34
82383	0_2_0	266	Type 34
82384	0_2_0	266	Type 34
82385	0_2_0	266	Type 34
82386	0_2_0	266	Type 34
82387	0_2_0	266	Type 34
82408	0_2_0	266	Type 34
82409	0_2_0	266	Type 34
82558	0_2_0	266	Type 34
82559	0_2_0	266	Type 34
82560	0_2_0	266	Type 34
82566	0_2_0	266	Type 34
82567	0_2_0	266	Type 34
82568	0_2_0	266	Type 34
82571	0_2_1	266	Type 34
82572	0_2_0	266	Type 34
82573	0_2_0	266	Type 34
82575	0_2_0	266	Type 34
82576	0_2_0	266	Type 34
82577	0_2_0	266	Type 34
82578	0_2_0	266	Type 34
82579	0_2_0	266	Type 34
82581	0_2_0	266	Type 34
82582	0_2_0	266	Type 34
82584	1_8_6	1503	Type 34
82585	0_0_26	1525	Type 34
82590	0_2_0	266	Type 34
82610	0_2_0	266	Type 34
82611	0_2_0	266	Type 34
84053	0_2_0	266	Type 34
84934	0_2_0	266	Type 34
85815	0_2_0	266	Type 34
85816	0_2_0	266	Type 34
85829	0_2_0	266	Type 34
85831	0_7_0	1526	Type 34
86423	0_2_0	266	Type 34
86541	0_2_0	266	Type 34
86575	0_2_0	266	Type 34
86590	1_8_6	266	Type 34
86594	0_0_26	1525	Type 34
86726	0_2_0	266	Type 34
86782	0_2_0	266	Type 34
86817	0_2_0	266	Type 34
86831	0_0_26	1525	Type 34
86870	0_2_0	266	Type 34
87086	0_2_0	266	Type 34
87093	0_2_0	266	Type 34
87099	0_2_0	266	Type 34
87104	0_2_0	266	Type 34
87106	0_2_0	266	Type 34
87107	0_2_0	266	Type 34
87124	0_2_0	266	Type 34
87127	0_2_0	266	Type 34
87128	0_2_0	266	Type 34
87142	0_2_0	266	Type 34
87150	0_2_0	266	Type 34
87159	0_2_0	266	Type 34
87160	0_2_0	266	Type 34
87166	0_2_0	266	Type 34
87167	0_2_0	266	Type 34
87180	0_2_0	266	Type 34
87182	0_2_0	266	Type 34
87183	0_2_0	266	Type 34
87184	0_2_0	266	Type 34
87187	0_2_0	266	Type 34
87188	0_2_0	266	Type 34
87189	0_2_0	266	Type 34
87193	0_2_0	266	Type 34
87202	0_2_0	266	Type 34
87206	0_2_0	266	Type 34
87211	0_2_0	266	Type 34
87213	0_2_0	266	Type 34
87214	0_2_0	266	Type 34
87216	0_2_0	266	Type 34
87228	0_2_0	266	Type 34
87229	0_2_0	266	Type 34
87232	0_2_0	266	Type 34
87236	0_2_0	266	Type 34
87242	0_2_0	266	Type 34
87249	0_2_0	266	Type 34
87253	0_2_0	266	Type 34
87260	0_2_0	266	Type 34
87262	0_2_0	266	Type 34
87268	0_2_0	266	Type 34
87285	0_2_0	1608	Type 34
87286	0_2_0	266	Type 34
87290	0_2_0	266	Type 34
87294	0_2_0	266	Type 34
87297	0_2_0	266	Type 34
87298	0_2_0	266	Type 34
87300	0_2_0	266	Type 34
87301	0_2_0	266	Type 34
87318	0_2_0	266	Type 34
87329	0_2_0	266	Type 34
87347	0_2_0	266	Type 34
87354	0_2_0	266	Type 34
87359	0_2_0	266	Type 34
87360	0_2_0	266	Type 34
87363	0_2_0	266	Type 34
87364	0_2_0	266	Type 34
87365	0_2_0	266	Type 34
87386	0_2_0	266	Type 34
87390	0_2_0	266	Type 34
87397	0_2_0	266	Type 34
87401	0_2_0	266	Type 34
87412	0_2_0	266	Type 34
87413	0_2_0	266	Type 34
87415	0_2_0	266	Type 34
87416	0_2_0	266	Type 34
87417	0_2_0	266	Type 34
87418	0_2_0	266	Type 34
87420	0_2_0	266	Type 34
87422	0_2_0	266	Type 34
87423	0_2_0	266	Type 34
87427	0_2_0	1932	Type 34
87429	0_2_0	266	Type 34
87439	0_2_0	266	Type 34
87462	0_2_0	266	Type 34
87463	0_2_0	266	Type 34
87467	0_2_0	266	Type 34
87468	0_2_0	266	Type 34
87470	0_2_0	266	Type 34
87476	0_2_0	266	Type 34
87477	0_2_0	266	Type 34
87478	0_2_0	266	Type 34
87479	0_2_0	266	Type 34
87480	0_2_0	266	Type 34
87482	0_2_0	266	Type 34
87485	0_2_0	266	Type 34
87487	0_2_0	266	Type 34
87505	0_2_0	266	Type 34
87509	0_2_0	266	Type 34
87512	0_2_0	266	Type 34
87516	0_2_0	266	Type 34
87517	0_2_0	266	Type 34
87519	0_2_0	266	Type 34
87520	0_2_0	266	Type 34
87522	0_2_0	266	Type 34
87525	0_2_0	266	Type 34
87527	0_2_0	266	Type 34
87529	0_2_0	266	Type 34
87531	0_2_0	266	Type 34
87535	0_2_0	266	Type 34
87542	0_2_0	266	Type 34
87543	0_2_0	266	Type 34
87544	0_2_0	266	Type 34
87547	0_2_0	266	Type 34
87548	0_2_0	266	Type 34
87549	0_2_0	266	Type 34
87550	0_2_0	266	Type 34
87554	0_2_0	266	Type 34
87556	0_2_0	266	Type 34
87569	0_2_0	266	Type 34
87574	0_2_0	266	Type 34
87577	0_2_0	266	Type 34
87594	0_2_0	266	Type 34
87595	0_2_0	266	Type 34
87598	0_2_0	266	Type 34
87600	0_2_0	266	Type 34
87611	0_2_0	266	Type 34
87631	0_2_0	266	Type 34
87632	0_2_0	266	Type 34
87633	0_2_0	266	Type 34
87647	0_2_0	266	Type 34
87650	0_2_0	266	Type 34
87685	0_2_0	266	Type 34
87686	0_2_0	266	Type 34
87712	0_2_0	266	Type 34
87716	0_2_0	266	Type 34
87728	0_2_0	266	Type 34
87748	0_2_0	266	Type 34
87750	0_2_0	266	Type 34
87753	0_2_0	266	Type 34
87756	0_2_0	266	Type 34
87757	0_2_0	266	Type 34
87758	0_2_0	266	Type 34
87764	0_2_0	266	Type 34
87769	0_2_0	266	Type 34
87773	0_2_0	266	Type 34
87783	0_2_0	266	Type 34
87784	0_2_0	266	Type 34
87785	0_2_0	266	Type 34
87787	0_2_0	266	Type 34
87790	0_2_0	266	Type 34
87792	0_2_0	266	Type 34
87793	0_2_0	266	Type 34
87845	0_2_0	266	Type 34
87846	0_2_0	266	Type 34
87901	0_2_0	266	Type 34
87902	0_2_0	266	Type 34
87920	0_2_0	266	Type 34
87921	0_2_0	266	Type 34
87923	0_2_0	266	Type 34
87924	0_2_0	266	Type 34
87933	0_2_0	266	Type 34
87939	0_2_0	266	Type 34
87943	0_2_0	266	Type 34
87945	0_2_0	266	Type 34
87954	0_2_0	266	Type 34
87955	0_2_0	266	Type 34
87958	0_2_0	266	Type 34
87977	0_2_0	266	Type 34
87998	0_2_0	266	Type 34
88007	0_2_0	266	Type 34
88008	0_2_0	266	Type 34
88012	0_2_0	266	Type 34
88018	0_2_0	266	Type 34
88030	0_2_0	266	Type 34
88031	0_2_0	266	Type 34
88033	0_2_0	266	Type 34
88035	0_2_0	266	Type 34
88036	0_2_0	266	Type 34
88037	0_2_0	266	Type 34
88043	0_2_0	266	Type 34
88049	0_2_0	266	Type 34
88050	0_2_0	266	Type 34
88053	0_2_0	266	Type 34
88062	0_2_0	266	Type 34
88064	0_2_0	266	Type 34
88073	0_2_0	266	Type 34
88077	0_2_0	266	Type 34
88081	0_2_0	266	Type 34
88082	0_2_0	266	Type 34
88083	0_2_0	266	Type 34
88093	0_2_0	266	Type 34
88098	0_2_0	266	Type 34
88117	0_2_0	266	Type 34
88255	0_2_0	266	Type 34
88262	0_2_0	266	Type 34
88263	0_2_0	266	Type 34
88265	0_2_0	266	Type 34
88307	0_2_0	266	Type 34
88318	0_2_0	266	Type 34
88320	0_2_0	266	Type 34
88321	0_2_0	266	Type 34
88322	0_2_0	266	Type 34
88326	0_2_0	266	Type 34
88328	0_2_0	266	Type 34
88330	0_2_0	266	Type 34
88339	0_2_0	266	Type 34
88342	0_2_0	266	Type 34
88343	0_2_0	266	Type 34
88344	0_2_0	266	Type 34
88345	0_2_0	266	Type 34
88351	0_2_0	266	Type 34
88355	0_2_0	266	Type 34
88356	0_2_0	266	Type 34
88357	0_2_0	266	Type 34
88360	0_2_0	266	Type 34
88361	0_2_0	266	Type 34
88362	0_2_0	266	Type 34
91535	0_2_0	266	Type 34
91537	0_2_0	266	Type 34
91647	0_2_0	266	Type 34
91656	0_2_0	266	Type 34
94013	0_7_0	1526	Type 34
95779	0_2_0	266	Type 34
99906	0_2_9	1526	Type 34
99907	0_2_9	1526	Type 34
100037	0_2_0	266	Type 34
100038	0_2_0	266	Type 34
100039	0_2_0	266	Type 34
101918	0_2_9	1526	Type 34
101927	0_2_1	266	Type 34
101934	0_2_0	266	Type 34
101962	1_1_2	266	Type 34
101985	0_0_26	4322	Type 34
101987	0_0_26	1525	Type 34
102038	0_2_0	266	Type 34
102042	0_2_0	266	Type 34
102044	0_2_0	266	Type 34
102075	0_2_0	266	Type 34
102090	0_0_26	1525	Type 34
102092	0_0_26	1525	Type 34
102108	0_2_0	266	Type 34
102129	0_2_0	266	Type 34
102130	0_2_0	266	Type 34
102141	0_2_0	266	Type 34
102146	0_2_0	266	Type 34
102151	0_2_0	266	Type 34
102163	0_2_0	266	Type 34
102170	0_0_26	1525	Type 34
102233	0_2_0	266	Type 34
102244	0_2_0	266	Type 34
102252	0_2_0	266	Type 34
102254	0_2_0	266	Type 34
102258	0_2_0	266	Type 34
102259	0_2_0	266	Type 34
102260	0_2_0	266	Type 34
102262	0_2_0	266	Type 34
102263	0_2_0	266	Type 34
102264	0_2_0	266	Type 34
102265	0_2_0	266	Type 34
102266	0_2_0	266	Type 34
102267	0_2_0	266	Type 34
102268	0_2_0	266	Type 34
102269	0_2_0	266	Type 34
102270	0_2_0	266	Type 34
102271	0_2_0	266	Type 34
102272	0_2_0	266	Type 34
102274	0_2_0	266	Type 34
102276	0_0_33	4326	Type 34
102278	0_2_0	266	Type 34
102279	0_2_0	266	Type 34
102280	0_2_0	266	Type 34
102281	0_2_0	266	Type 34
102283	0_2_0	266	Type 34
102284	0_2_0	266	Type 34
102285	0_2_0	266	Type 34
102286	0_2_0	266	Type 34
102287	0_2_0	266	Type 34
102289	0_0_26	1525	Type 34
102290	0_2_0	266	Type 34
102291	0_2_0	266	Type 34
102293	0_2_0	266	Type 34
102294	0_2_0	266	Type 34
102296	0_2_0	266	Type 34
102327	0_2_0	266	Type 34
102329	0_2_0	266	Type 34
106023	0_2_0	266	Type 34
106024	0_2_0	266	Type 34
106328	0_2_0	266	Type 34
106330	0_2_0	266	Type 34
106331	0_2_0	266	Type 34
106335	0_2_0	266	Type 34
106645	0_2_1	266	Type 34
106656	0_2_1	266	Type 34
106681	0_2_1	266	Type 34
106682	0_2_0	266	Type 34
106684	0_2_0	266	Type 34
106718	0_2_0	266	Type 34
106726	0_2_1	266	Type 34
106729	0_2_1	266	Type 34
106731	0_2_1	266	Type 34
106752	0_2_1	266	Type 34
106755	0_2_0	266	Type 34
106767	0_2_1	266	Type 34
106771	0_2_1	266	Type 34
106776	0_2_1	266	Type 34
106779	0_2_1	266	Type 34
106782	0_2_1	266	Type 34
106783	0_2_0	266	Type 34
106798	0_2_0	266	Type 34
106802	0_2_1	266	Type 34
106807	0_2_0	266	Type 34
106843	0_2_0	266	Type 34
106851	0_2_1	266	Type 34
106853	0_2_0	266	Type 34
106855	0_2_0	266	Type 34
106898	0_2_0	266	Type 34
106906	0_2_0	266	Type 34
106974	0_2_1	266	Type 34
107000	0_2_1	266	Type 34
107031	0_2_0	266	Type 34
107043	0_2_1	266	Type 34
107064	0_2_1	266	Type 34
107079	0_2_0	266	Type 34
107118	0_2_0	266	Type 34
107129	0_2_0	266	Type 34
107137	0_2_0	266	Type 34
107139	0_2_0	266	Type 34
107157	0_2_0	266	Type 34
107173	0_2_0	266	Type 34
107196	0_2_0	266	Type 34
107197	0_2_0	266	Type 34
107207	0_2_0	266	Type 34
107214	0_2_0	266	Type 34
107215	0_2_0	266	Type 34
107216	0_2_0	266	Type 34
107218	0_2_0	266	Type 34
107221	0_2_0	266	Type 34
107223	0_2_0	266	Type 34
107226	0_2_0	266	Type 34
107227	0_2_0	266	Type 34
107245	0_2_0	266	Type 34
107257	0_2_0	266	Type 34
107266	0_2_0	266	Type 34
107286	0_2_0	266	Type 34
107288	0_2_0	266	Type 34
107289	0_2_0	266	Type 34
107296	0_2_0	266	Type 34
107436	0_2_1	266	Type 34
107438	0_2_0	266	Type 34
107487	0_2_1	266	Type 34
107559	0_2_1	266	Type 34
107565	0_2_0	266	Type 34
107593	0_2_0	266	Type 34
107602	0_2_0	266	Type 34
107628	0_2_0	266	Type 34
107662	0_2_0	266	Type 34
107667	0_2_0	266	Type 34
107679	0_2_1	266	Type 34
107705	0_2_1	266	Type 34
107714	0_2_1	266	Type 34
107727	0_2_1	266	Type 34
107735	0_2_0	266	Type 34
107736	0_2_0	266	Type 34
107742	0_2_0	266	Type 34
107750	0_2_0	266	Type 34
107752	0_2_0	266	Type 34
107755	0_2_0	266	Type 34
107760	0_2_0	266	Type 34
107772	0_2_0	266	Type 34
107785	0_2_0	266	Type 34
107790	0_2_1	266	Type 34
107826	0_2_0	266	Type 34
107831	0_2_0	266	Type 34
107838	0_2_0	266	Type 34
107839	0_2_0	266	Type 34
107840	0_2_0	2608	Type 34
107841	0_2_0	266	Type 34
107853	0_2_0	266	Type 34
107857	0_2_0	266	Type 34
107858	0_2_0	266	Type 34
107859	0_2_0	266	Type 34
107860	0_2_0	266	Type 34
107861	0_2_0	266	Type 34
107863	0_2_0	266	Type 34
107864	0_2_0	266	Type 34
107865	0_2_0	266	Type 34
107866	0_2_0	266	Type 34
107867	0_2_0	266	Type 34
107868	0_2_0	266	Type 34
107869	0_2_0	266	Type 34
107870	0_2_0	266	Type 34
107871	0_2_0	266	Type 34
107872	0_2_0	266	Type 34
107873	0_2_0	266	Type 34
107874	0_2_0	266	Type 34
107875	0_2_0	266	Type 34
107876	0_2_0	266	Type 34
107877	0_2_0	266	Type 34
107878	0_2_0	266	Type 34
107879	0_2_0	266	Type 34
107880	0_2_0	266	Type 34
107881	0_2_0	266	Type 34
107882	0_2_0	266	Type 34
107883	0_2_0	266	Type 34
107884	0_2_0	266	Type 34
107887	0_2_0	266	Type 34
107888	0_2_0	266	Type 34
107889	0_2_0	266	Type 34
107890	0_2_0	266	Type 34
107891	0_2_0	266	Type 34
107892	0_2_0	266	Type 34
107893	0_2_0	266	Type 34
107894	0_2_0	266	Type 34
107898	0_0_26	1525	Type 34
107908	0_2_0	266	Type 34
107909	0_0_26	1525	Type 34
107910	0_0_26	1525	Type 34
107914	0_0_26	4322	Type 34
107918	0_2_0	266	Type 34
107921	0_2_0	266	Type 34
107922	0_2_0	266	Type 34
107928	0_2_0	266	Type 34
107930	0_2_0	266	Type 34
107932	0_2_0	266	Type 34
107933	0_2_0	266	Type 34
107937	0_0_26	1525	Type 34
107951	0_2_0	266	Type 34
107952	0_2_0	266	Type 34
107958	0_2_0	266	Type 34
107960	0_2_0	266	Type 34
107962	0_0_26	1525	Type 34
107973	0_2_0	266	Type 34
107974	0_2_0	266	Type 34
107987	0_2_0	266	Type 34
107992	0_2_1	266	Type 34
108008	0_2_0	266	Type 34
108012	0_0_26	1525	Type 34
108018	0_2_0	266	Type 34
108298	0_2_0	266	Type 34
108391	0_2_0	266	Type 34
108395	0_2_0	266	Type 34
108414	0_2_0	266	Type 34
108440	0_2_0	266	Type 34
108442	0_2_0	266	Type 34
108449	0_2_0	266	Type 34
108465	0_2_0	266	Type 34
108471	0_2_0	266	Type 34
108473	0_2_0	266	Type 34
108476	0_2_0	266	Type 34
108482	0_2_0	266	Type 34
108485	0_2_0	266	Type 34
108490	0_2_0	266	Type 34
108491	0_2_0	266	Type 34
108493	0_2_0	266	Type 34
108494	0_2_0	266	Type 34
108495	0_2_0	266	Type 34
108496	0_2_0	266	Type 34
108497	0_2_0	266	Type 34
108498	0_2_0	266	Type 34
108499	0_2_0	266	Type 34
108500	0_2_0	266	Type 34
108501	0_2_0	266	Type 34
108502	0_2_0	266	Type 34
108503	0_2_0	266	Type 34
108504	0_2_0	266	Type 34
108505	0_2_0	266	Type 34
108507	0_2_0	266	Type 34
108508	0_2_0	266	Type 34
108509	0_2_0	266	Type 34
108510	0_2_0	266	Type 34
108512	0_2_0	266	Type 34
108513	0_2_0	266	Type 34
108514	0_2_0	266	Type 34
108516	0_2_0	266	Type 34
108517	0_2_0	266	Type 34
108518	0_2_0	266	Type 34
108519	0_2_0	266	Type 34
108522	0_2_0	266	Type 34
108523	0_2_0	266	Type 34
108524	0_2_0	266	Type 34
108525	0_2_0	266	Type 34
108526	0_2_0	266	Type 34
108528	0_2_0	266	Type 34
108529	0_2_0	266	Type 34
108531	0_2_0	266	Type 34
108532	0_2_0	266	Type 34
108533	0_2_0	266	Type 34
108535	0_2_0	3146	Type 34
108536	0_2_0	266	Type 34
108540	0_2_0	266	Type 34
108541	0_2_0	266	Type 34
108542	0_2_0	266	Type 34
108543	0_2_0	266	Type 34
108544	0_2_0	266	Type 34
108546	0_2_0	266	Type 34
108547	0_2_0	266	Type 34
108548	0_2_0	266	Type 34
108549	0_2_0	266	Type 34
108553	0_2_0	266	Type 34
108554	0_2_0	266	Type 34
108556	0_2_0	266	Type 34
108557	0_2_0	266	Type 34
108558	0_2_0	266	Type 34
108563	0_2_0	266	Type 34
108564	0_2_0	266	Type 34
108565	0_2_0	266	Type 34
108566	0_2_0	266	Type 34
108567	0_2_0	266	Type 34
108568	0_2_0	266	Type 34
108569	0_2_0	266	Type 34
108571	0_2_0	266	Type 34
108572	0_2_0	266	Type 34
108573	0_2_0	266	Type 34
108574	0_2_0	266	Type 34
108575	0_2_0	266	Type 34
108576	0_2_0	266	Type 34
108577	0_2_0	266	Type 34
108579	0_2_0	266	Type 34
108580	0_2_0	266	Type 34
108581	0_2_0	266	Type 34
108582	0_2_0	266	Type 34
108584	0_2_0	266	Type 34
108585	0_2_0	266	Type 34
108586	0_2_0	266	Type 34
108587	0_2_0	266	Type 34
108588	0_2_0	266	Type 34
108593	0_2_0	266	Type 34
108594	0_2_0	266	Type 34
108595	0_2_0	266	Type 34
108596	0_2_0	266	Type 34
108597	0_2_0	266	Type 34
108598	0_2_0	266	Type 34
108599	0_2_0	266	Type 34
108600	0_2_0	266	Type 34
108601	0_2_0	266	Type 34
108602	0_2_0	266	Type 34
108603	0_2_0	266	Type 34
108604	0_0_33	266	Type 34
108606	0_2_0	266	Type 34
108701	0_2_0	266	Type 34
108718	0_2_0	266	Type 34
108747	0_2_0	266	Type 34
108749	0_2_0	266	Type 34
108771	0_2_0	266	Type 34
108773	0_2_0	266	Type 34
108781	0_2_0	266	Type 34
108790	0_2_0	266	Type 34
108796	0_2_0	266	Type 34
108802	0_2_0	266	Type 34
108804	0_2_0	266	Type 34
108805	0_2_0	266	Type 34
108809	0_2_0	266	Type 34
108810	0_2_0	266	Type 34
108812	0_2_0	266	Type 34
108813	0_2_0	266	Type 34
108814	0_2_0	266	Type 34
108818	0_2_0	266	Type 34
108819	0_2_0	266	Type 34
108821	0_2_0	266	Type 34
108822	0_2_0	266	Type 34
108823	0_2_0	266	Type 34
108828	0_2_0	266	Type 34
108832	0_2_0	266	Type 34
108833	0_2_0	266	Type 34
108834	0_2_0	266	Type 34
108835	0_2_0	266	Type 34
108836	0_2_0	266	Type 34
108837	0_2_0	266	Type 34
108842	0_2_0	266	Type 34
108851	0_2_0	266	Type 34
108853	0_2_0	266	Type 34
108854	0_2_0	266	Type 34
108855	0_2_0	266	Type 34
108857	0_2_0	266	Type 34
108860	0_2_0	266	Type 34
108861	0_2_0	266	Type 34
108866	0_2_0	266	Type 34
108869	0_2_0	266	Type 34
108871	0_2_0	266	Type 34
108873	0_2_0	266	Type 34
108882	0_2_0	266	Type 34
108893	0_2_0	266	Type 34
108897	0_2_0	266	Type 34
108917	0_2_0	266	Type 34
108923	0_2_0	266	Type 34
108924	0_2_0	266	Type 34
108942	0_2_0	266	Type 34
108966	0_2_0	266	Type 34
108988	0_2_0	266	Type 34
109014	0_2_0	266	Type 34
109015	0_2_0	266	Type 34
109263	0_2_0	266	Type 34
109264	0_2_0	266	Type 34
109265	0_2_0	266	Type 34
109266	0_2_0	266	Type 34
109267	0_2_0	266	Type 34
109268	0_2_0	266	Type 34
109269	0_2_0	266	Type 34
109270	0_2_0	266	Type 34
109271	0_2_0	266	Type 34
109272	0_2_0	266	Type 34
109273	0_2_0	266	Type 34
109274	0_2_0	266	Type 34
109275	0_2_0	266	Type 34
109276	0_2_0	266	Type 34
109323	0_2_0	266	Type 34
109324	0_2_0	266	Type 34
109325	0_2_0	266	Type 34
109326	0_2_0	266	Type 34
109473	0_2_0	266	Type 34
109474	0_2_0	266	Type 34
109475	0_2_0	266	Type 34
109476	0_2_0	266	Type 34
109477	0_2_0	266	Type 34
109478	0_2_0	266	Type 34
109584	0_2_0	266	Type 34
109585	0_2_0	266	Type 34
109586	0_2_0	266	Type 34
109587	0_2_0	266	Type 34
109590	0_2_0	266	Type 34
109591	0_2_0	266	Type 34
109594	0_2_0	266	Type 34
109595	0_2_0	266	Type 34
109596	0_2_0	266	Type 34
109597	0_2_0	266	Type 34
109598	0_2_0	266	Type 34
109599	0_2_0	266	Type 34
109835	0_2_0	266	Type 34
109836	0_2_0	266	Type 34
109837	0_2_0	266	Type 34
109839	0_2_0	266	Type 34
109843	0_2_0	266	Type 34
109844	0_2_0	266	Type 34
109849	0_2_0	266	Type 34
109852	0_2_0	266	Type 34
109853	0_2_0	266	Type 34
109854	0_2_0	266	Type 34
109855	0_2_0	266	Type 34
111454	0_2_53	266	Type 34
111481	0_2_1	266	Type 34
111488	0_7_0	1526	Type 34
111610	0_2_0	266	Type 34
111683	0_0_26	1525	Type 34
111687	0_0_26	1525	Type 34
115158	0_7_0	1526	Type 34
115790	0_7_0	1526	Type 34
115856	0_2_0	266	Type 34
115864	0_2_0	266	Type 34
115869	0_2_0	266	Type 34
116086	0_2_0	266	Type 34
116259	0_2_0	266	Type 34
116265	0_2_0	266	Type 34
116269	0_2_0	266	Type 34
116274	0_2_0	266	Type 34
116275	0_2_0	266	Type 34
116284	0_2_0	266	Type 34
116286	0_2_0	266	Type 34
116289	0_2_0	266	Type 34
116295	0_2_0	266	Type 34
116296	0_2_0	266	Type 34
116305	0_2_0	266	Type 34
116312	0_2_0	266	Type 34
116317	0_2_0	266	Type 34
116321	0_2_0	266	Type 34
116323	0_2_0	266	Type 34
116326	0_2_0	266	Type 34
116331	0_2_0	266	Type 34
116336	0_2_0	266	Type 34
116339	0_2_0	266	Type 34
116341	0_2_0	266	Type 34
116349	0_2_0	266	Type 34
116356	0_2_0	2608	Type 34
116366	0_2_0	266	Type 34
116377	0_2_0	266	Type 34
116383	0_2_0	266	Type 34
116384	0_2_0	266	Type 34
116400	0_2_0	266	Type 34
116515	0_2_0	266	Type 34
117780	0_2_0	266	Type 34
117792	0_2_0	266	Type 34
117810	0_2_0	266	Type 34
117818	0_2_0	266	Type 34
117827	0_2_0	266	Type 34
117939	1_8_6	1503	Type 34
117942	1_8_6	1503	Type 34
117972	0_2_0	266	Type 34
117975	0_2_0	266	Type 34
117986	0_2_0	266	Type 34
117999	0_2_0	266	Type 34
118011	0_2_0	266	Type 34
118032	0_2_0	266	Type 34
118047	0_2_0	266	Type 34
118048	0_2_0	266	Type 34
118061	0_2_0	266	Type 34
118068	0_2_0	266	Type 34
118079	0_2_0	266	Type 34
118097	0_2_0	266	Type 34
118108	0_2_0	266	Type 34
118110	0_2_0	266	Type 34
118128	0_2_0	266	Type 34
118141	0_2_0	266	Type 34
118192	0_2_0	266	Type 34
118204	0_2_0	266	Type 34
118358	1_8_6	1503	Type 34
118370	1_8_6	1503	Type 34
118521	0_2_0	266	Type 34
118522	0_2_0	266	Type 34
118561	0_2_0	266	Type 34
118562	0_2_0	266	Type 34
118659	0_2_0	266	Type 34
118660	0_2_0	266	Type 34
118662	0_2_0	266	Type 34
118665	0_2_0	266	Type 34
118669	0_2_0	266	Type 34
118670	0_2_0	266	Type 34
118675	0_2_0	266	Type 34
118681	0_2_0	266	Type 34
118685	0_2_0	266	Type 34
118690	0_2_0	266	Type 34
118699	0_2_0	266	Type 34
118700	0_2_0	266	Type 34
118713	0_2_0	266	Type 34
118727	0_2_0	266	Type 34
118728	0_2_0	266	Type 34
118733	0_2_0	266	Type 34
118737	0_2_0	266	Type 34
118741	0_2_0	266	Type 34
118743	0_2_0	266	Type 34
118751	0_2_0	266	Type 34
118821	0_2_0	266	Type 34
118826	0_2_0	266	Type 34
119080	0_2_0	266	Type 34
119146	0_2_0	266	Type 34
119162	0_2_0	266	Type 34
119168	0_2_0	266	Type 34
119209	0_2_0	266	Type 34
119284	0_2_0	266	Type 34
119358	1_8_6	1503	Type 34
119364	1_8_6	1503	Type 34
119398	0_2_0	266	Type 34
119399	0_2_0	266	Type 34
119401	0_2_0	266	Type 34
119419	0_2_0	266	Type 34
119435	0_0_26	266	Type 34
119447	0_2_0	266	Type 34
119625	0_2_0	266	Type 34
119628	0_2_0	266	Type 34
119762	0_2_0	266	Type 34
119775	0_2_0	266	Type 34
119778	0_2_0	266	Type 34
119793	0_2_0	266	Type 34
119918	0_2_0	266	Type 34
125560	0_0_26	1525	Type 34
125569	0_2_1	1526	Type 34
125571	0_2_0	266	Type 34
125624	0_2_1	266	Type 34
125629	0_2_1	1526	Type 34
125635	0_2_1	1526	Type 34
125636	0_2_1	1526	Type 34
125655	0_7_0	1526	Type 34
125672	0_2_1	1526	Type 34
125673	0_2_1	266	Type 34
125703	0_2_1	1526	Type 34
125704	0_2_1	266	Type 34
125709	0_2_1	266	Type 34
125717	0_2_1	1526	Type 34
125759	0_2_1	1526	Type 34
125766	0_2_9	1526	Type 34
125771	0_7_0	1526	Type 34
125775	0_2_1	1526	Type 34
125788	1_8_6	1503	Type 34
125793	0_2_1	266	Type 34
125796	0_2_1	266	Type 34
125819	0_7_0	1526	Type 34
125825	0_7_0	1526	Type 34
125834	0_7_0	1526	Type 34
125838	1_8_6	1503	Type 34
125860	0_7_0	1526	Type 34
125872	0_2_1	266	Type 34
125879	0_2_1	266	Type 34
127210	0_2_1	266	Type 34
128736	0_2_0	266	Type 34
128748	0_2_0	266	Type 34
128754	1_8_6	1503	Type 34
128755	1_8_6	1503	Type 34
128760	0_2_0	266	Type 34
128761	0_2_0	266	Type 34
128765	0_2_0	266	Type 34
128790	0_2_0	266	Type 34
128803	1_8_6	1503	Type 34
128804	1_8_6	1503	Type 34
128955	0_2_0	266	Type 34
128967	0_2_0	266	Type 34
128974	0_2_0	266	Type 34
128982	0_2_0	266	Type 34
128997	0_2_0	266	Type 34
129000	0_2_0	266	Type 34
129117	0_2_1	266	Type 34
129185	0_2_0	266	Type 34
129240	0_2_0	266	Type 34
129243	0_2_0	266	Type 34
129274	0_2_0	266	Type 34
129369	1_8_6	1503	Type 34
129535	1_1_17	266	Type 34
129542	0_2_1	266	Type 34
129547	0_2_1	266	Type 34
129558	0_2_0	266	Type 34
129605	0_2_0	266	Type 34
129638	0_2_0	266	Type 34
129682	0_2_0	266	Type 34
129704	0_2_1	266	Type 34
129713	0_2_0	266	Type 34
129714	0_2_0	266	Type 34
129721	0_2_0	266	Type 34
129746	0_2_0	266	Type 34
129747	0_2_0	266	Type 34
129748	0_2_0	266	Type 34
129755	0_2_0	266	Type 34
129757	0_2_0	266	Type 34
129830	0_2_0	266	Type 34
129832	0_2_0	266	Type 34
129835	0_2_0	266	Type 34
129844	0_2_0	266	Type 34
129881	0_2_0	266	Type 34
129885	0_2_0	266	Type 34
129890	0_2_0	266	Type 34
129894	0_2_0	266	Type 34
129948	0_2_0	266	Type 34
129960	1_8_6	1503	Type 34
129962	0_2_0	266	Type 34
129974	0_2_0	266	Type 34
129978	0_2_0	266	Type 34
129984	0_7_0	3077	Type 34
130011	1_1_17	266	Type 34
130012	1_1_17	266	Type 34
130066	0_2_0	266	Type 34
130070	0_2_0	266	Type 34
130095	0_7_0	1836	Type 34
130098	0_7_0	1836	Type 34
130103	0_7_0	1836	Type 34
130237	0_7_0	1526	Type 34
130247	0_2_0	266	Type 34
130261	0_2_0	266	Type 34
130281	0_2_0	266	Type 34
130376	1_8_6	1503	Type 34
130416	0_2_0	266	Type 34
130421	0_2_0	266	Type 34
130430	0_2_0	266	Type 34
130462	0_2_0	266	Type 34
130480	0_7_0	1836	Type 34
130560	0_0_26	1525	Type 34
130576	0_7_0	1836	Type 34
130631	0_2_0	266	Type 34
130637	0_2_0	266	Type 34
130686	0_7_0	1836	Type 34
130708	0_2_0	266	Type 34
130715	0_2_0	266	Type 34
130719	0_2_0	266	Type 34
130721	0_2_0	266	Type 34
130732	0_2_0	266	Type 34
130752	0_2_0	266	Type 34
130758	0_2_0	266	Type 34
130788	0_7_0	1836	Type 34
130793	0_2_0	266	Type 34
130799	0_2_0	266	Type 34
130802	0_2_0	266	Type 34
130803	0_2_0	266	Type 34
130844	0_2_0	266	Type 34
130858	0_2_0	266	Type 34
130871	0_2_0	266	Type 34
130878	0_2_0	266	Type 34
130945	0_2_0	266	Type 34
130995	0_2_0	266	Type 34
131005	0_2_0	266	Type 34
131060	0_2_0	266	Type 34
131237	0_2_0	266	Type 34
131602	0_2_0	266	Type 34
131603	0_2_0	266	Type 34
131606	0_2_0	266	Type 34
131608	0_2_0	266	Type 34
134973	0_2_0	266	Type 34
143795	0_2_1	1526	Type 34
143801	0_2_0	266	Type 34
143803	0_2_0	1526	Type 34
143812	0_2_0	266	Type 34
143813	0_2_0	266	Type 34
143852	0_2_0	266	Type 34
143853	0_2_1	1526	Type 34
143860	0_2_1	1526	Type 34
143873	0_2_0	266	Type 34
