# Supplementary material for: Neisseria gonorrhoeae LIN codes provide a robust, multi-resolution lineage nomenclature
Source: eLife. 2025 Dec 31;14:RP107758. doi: 10.7554/eLife.107758 (PMC12755878; doi:10.7554/eLife.107758)
Supplement: Supplementary file 7. — Eight principal LIN code lineages were identified in this re-analysis. [file elife-107758-supp7.xlsx]

## Sheet: Sheet1
id	isolate	aliases	country	year	LINcode (N. gonorrhoeae cgMLST v2)	ST (MLST)
32075	12_308	12045_8_77; ERR485167	Spain	2012	0_2_0_1_27_29_0_0_0_0_0	1901
46287	H15_353		UK	2015	0_2_0_1_228_1_0_1_0_0_0	1901
61379	WHO_Z	A8806	Australia	2013	0_2_17_0_12_1_0_0_0_0_0	7363
63365	SS3160		Japan	2017	0_14_0_0_15_0_0_0_0_0_0	13429
63678	GC250		China	2018	0_14_0_0_13_0_0_0_0_0_0	7365
63679	GC249		China	2018	0_14_0_0_13_0_0_0_0_0_0	7365
63682	GC195		China	2017	0_14_0_0_14_0_0_0_0_0_0	1903
88865	WHO X	H041; NCTC_13820	Japan	2009	0_2_17_0_9_14_0_0_0_0_0	7363
107854	ERR2865779	A2543	Australia	2018	0_2_9_14_40_10_0_0_0_0_0	12039
107855	ERR2865780	A2735	Australia	2018	0_2_9_14_40_10_0_0_0_0_0	12039
108019	CA_51742		Canada	2018	0_14_0_0_11_1_0_0_0_0_0	1903
108258	KU16054		Japan	2016	0_14_0_0_12_0_0_0_1_0_0	1903
108259	KM383		Japan	2017	0_14_0_0_21_0_0_0_0_0_0	1903
108260	KU17039		Japan	2017	0_14_0_0_21_0_0_0_0_0_0	1903
108261	FC428	AP018377	Japan	2015	0_14_0_0_12_0_0_0_0_0_0	1903
108262	FC460	AP018381	Japan	2015	0_14_0_0_12_0_0_0_0_0_0	1903
108263	FC498	AP018385	Japan	2015	0_14_0_0_12_0_0_1_0_0_0	1903
115835	IR72	UYWZ01000000	Ireland	2018	0_14_0_0_20_0_0_0_0_0_0	1903
117206	AT159		Austria	2022	0_2_9_31_0_1_0_0_0_1_0	16406
140991	SRR22570615	22R655478U	Cambodia	2022	0_0_26_42_0_0_0_0_0_1_0	17961
143896	H23-281		UK [England]	2023	0_14_0_1_1_4_0_0_0_0_0	13871
143897	H22-408	Case 7; ERR10659313	UK [England]	2022	0_0_15_0_17_1_0_0_0_1_0	8123
143898	H21-741	Case 1; ERR10659307	UK [England]	2021	0_0_15_0_16_0_0_0_0_0_0	8123
143899	H19-271		UK [England]	2019	0_14_0_0_27_0_0_0_0_0_0	13943
143900	H23-343		UK [England]	2023	0_2_0_66_0_0_0_0_0_0_0	1579
143901	H23-313		UK [England]	2023	0_2_0_16_24_0_0_0_0_0_0	10314
143902	H23-303		UK [England]	2023	0_7_0_43_0_0_0_0_0_0_0	18066
143903	H23-664		UK [England]	2023	0_0_30_9_7_0_0_0_0_0_0	8130
143904	H21-696		UK [England]	2021	0_0_33_194_0_0_0_0_0_0_0	6712
143905	H23-612		UK [England]	2023	0_0_15_0_13_0_0_0_0_0_0	8123
143906	H22-722	Case 9; ERR10659315	UK [England]	2022	0_2_0_4_257_0_0_0_0_0_0	1901
143907	H22-742	Case 2; ERR10659308	UK [England]	2022	0_0_15_0_15_1_0_0_0_0_0	8123
147433	H24-441		UK [England]	2024	0_0_30_9_6_0_0_0_0_0_0	8130
164889	H17-486		UK [England]	2017	0_2_0_1_381_0_0_0_0_0_0	1901
164890	H19-473		UK [England]	2019	0_14_0_0_11_2_0_0_0_0_0	1903
164891	H22-324		UK [England]	2022	0_0_15_0_14_0_0_0_0_0_0	8123
164892	H23-403		UK [England]	2023	0_14_0_1_1_4_0_0_0_0_0	13871
164893	H23-672		UK [England]	2023	0_2_9_31_0_1_1_0_0_0_0	16406
164894	H24-403		UK [England]	2024	0_2_9_31_0_1_0_1_0_0_0	16406
164895	H24-496		UK [England]	2024	0_2_9_31_5_0_0_0_0_0_0	18091
164896	H24-541		UK [England]	2024	0_2_9_31_4_0_0_0_0_0_0	16406
164935	SRR22570588	22R655490O	Cambodia	2022	0_0_30_9_2_1_0_0_0_0_0	8130
164936	SRR22570589	22R655489W	Cambodia	2022	0_14_0_1_6_0_0_0_0_2_0	13871
164937	SRR22570590	22R655488V	Cambodia	2022	0_14_0_1_6_0_0_0_1_0_0	13871
164938	SRR22570591	22R655486T	Cambodia	2022	0_0_30_9_1_0_0_0_1_0_0	8130
164939	SRR22570592	22R655485S	Cambodia	2022	0_0_30_9_3_0_0_0_0_1_0	8130
164940	SRR22570593	22R655484R	Cambodia	2022	0_14_0_1_4_0_1_0_1_0_0	13871
164941	SRR22570594	22R655483Q	Cambodia	2022	0_7_0_33_0_0_0_0_0_1_0	1587
164942	SRR22570595	22R655567T	Cambodia	2022	0_2_9_31_1_0_0_0_1_0_0	16406
164943	SRR22570596	22R655558T	Cambodia	2022	0_2_9_30_1_0_0_0_0_0_0	16406
164944	SRR22570597	22R655555Q	Cambodia	2022	0_0_30_9_0_0_0_0_0_1_0	8130
164945	SRR22570598	22R655554P	Cambodia	2022	0_7_0_1_2_1_0_0_0_0_0	7363
164946	SRR22570599	22R655550L	Cambodia	2022	0_18_1_25_0_0_0_0_0_1_0	11368
164947	SRR22570600	22R655548S	Cambodia	2022	0_14_0_2_1_0_0_0_0_1_0	13871
164948	SRR22570601	22R655538R	Cambodia	2022	0_0_26_31_1_0_0_0_0_1_0	8143
164949	SRR22570602	22R655524M	Cambodia	2022	0_7_0_30_2_0_0_0_0_1_0	7363
164950	SRR22570603	22R655481O	Cambodia	2022	0_14_0_1_5_0_0_0_0_1_0	13871
164951	SRR22570604	22R655523L	Cambodia	2022	0_7_0_32_0_0_0_0_0_1_0	7363
164952	SRR22570605	22R655515M	Cambodia	2022	0_14_0_1_1_3_0_0_0_1_0	13871
164953	SRR22570606	22R655514L	Cambodia	2022	0_0_30_9_2_2_0_0_0_0_0	8130
164954	SRR22570607	22R655512J	Cambodia	2022	0_0_30_9_5_0_0_0_0_1_0	8130
164955	SRR22570608	22R655511I	Cambodia	2022	0_0_30_9_4_0_0_0_0_0_0	8130
164956	SRR22570609	22R655509P	Cambodia	2022	0_0_30_9_2_0_0_0_0_0_0	8130
164957	SRR22570610	22R655501H	Cambodia	2022	0_7_0_1_2_0_0_0_0_0_0	7363
164958	SRR22570611	22R655500G	Cambodia	2022	0_7_0_30_1_0_0_0_0_0_0	7363
164959	SRR22570612	22R655494S	Cambodia	2022	0_2_9_31_2_0_0_0_0_0_0	16406
164960	SRR22570613	22R655491P	Cambodia	2022	0_0_30_9_2_1_0_0_0_0_0	8130
164961	SRR22570614	22R655480N	Cambodia	2022	0_7_0_33_0_1_0_0_0_0_0	1587
164962	SRR24964567	22R655487U	Cambodia	2022	0_14_0_1_4_0_1_0_0_1_0	13871
164966	CP048893	SRRSH240	China	2019	0_14_0_0_11_3_0_0_0_0_0	1903
164967	CP048908	SRRSH203	China	2019	0_14_0_0_30_0_0_1_0_0_0	1600
164968	CP048911	SRRSH204	China	2019	0_14_0_0_30_0_0_0_0_0_0	1600
164969	CP048902	SRRSH207	China	2019	0_14_0_0_11_3_0_0_0_0_0	1903
164970	CP048905	SRRSH205	China	2019	0_14_0_0_30_0_0_1_0_0_0	1600
164971	CP048896	SRRSH229	China	2019	0_14_0_0_30_0_0_1_0_0_0	1600
164972	CP048899	SRRSH214	China	2019	0_14_0_0_30_0_1_0_0_0_0	1600
165250	H22-743	Case 3; ERR10659309	UK [England]	2022	0_0_15_0_15_0_0_0_0_0_0	8123
165251	H22-631	Case 4; ERR10659310	UK [Wales]	2022	0_0_15_0_14_0_0_0_1_0_0	8123
165252	H22-303	Case 5; ERR10659311	UK [Wales]	2022	0_0_15_0_14_0_0_0_1_0_0	8123
165253	H22-807	CAse 6; ERR10659312	UK [England]	2022	0_0_15_0_17_0_0_0_0_0_0	8123
165254	H22-788	Case 8; ERR10659314	UK [England]	2022	0_0_15_0_17_1_0_0_0_0_0	8123
165255	H22-494	Case 10; ERR10659316	UK [England]	2022	0_2_9_31_0_1_0_0_1_0_0	16406
165256	H18-209	Case 1; SRR8695247	UK [England]	2018	0_14_0_0_32_0_0_0_0_0_0	1903
165257	H18-502	Case 2; SRR8695248	UK [England]	2018	0_14_0_0_32_0_0_0_1_0_0	1903
165258	GD2021272	SRR24303588	China	2021	0_14_0_0_35_1_0_0_0_0_0	1903
165259	GD2021271	SRR24303589	China	2021	0_14_0_0_35_0_0_0_0_0_0	1903
165260	GD2021270	SRR24303590	China	2021	0_14_0_0_35_1_0_0_0_0_0	1903
165261	GD2021269	SRR24303591	China	2021	0_14_0_0_34_0_0_0_0_0_0	1903
165262	GD2021268	SRR24303592	China	2021	0_14_0_0_33_0_0_0_0_0_0	1903
165263	GD2021267	SRR24303593	China	2021	0_14_0_0_31_0_0_0_0_0_0	1903
165264	GD2021266	SRR24303594	China	2021	0_14_0_0_27_1_0_0_0_0_0	13943
165265	GD2021265	SRR24303595	China	2021	0_14_0_0_29_0_0_0_0_0_0	7365
165266	GD2021291	SRR24303596	China	2021	0_14_0_0_28_0_0_0_0_0_0	7365
165267	GD2021273	SRR24303597	China	2021	0_14_0_0_35_1_0_0_0_1_0	1903
165268	GD2021236	SRR24303598	China	2021	0_0_33_38_2_0_0_0_0_0_0	1588
165269	GD2021027	SRR24303599	China	2021	0_2_0_16_24_0_0_0_1_0_0	10314
165270	VN256T		Vietnam	2019	0_14_0_1_1_2_0_0_0_1_0	13871
165272	VN20T		Vietnam	2020	0_14_0_1_1_5_0_0_0_0_0	13871
165273	VN37T		Vietnam	2020	0_14_0_1_1_2_0_0_0_2_0	13871
165274	VN43T		Vietnam	2020	0_14_0_1_7_0_0_0_0_0_0	13871
165275	VN44T		Vietnam	2020	0_14_0_1_1_8_0_1_0_1_0	13871
165276	VN75T		Vietnam	2020	0_14_0_1_1_2_0_0_1_0_0	13871
165277	VN76T		Vietnam	2020	0_14_0_1_1_8_0_1_0_0_0	13871
165278	VN98T		Vietnam	2020	0_14_0_1_1_8_0_0_0_0_0	13871
165279	VN128T		Vietnam	2020	0_14_0_1_1_8_0_0_0_0_0	13871
165280	VN03D		Vietnam	2020	0_14_0_1_1_2_1_0_0_0_0	13871
165281	VN34D		Vietnam	2020	0_14_0_1_1_7_0_0_0_0_0	13871
165282	VN233T		Vietnam	2019	0_14_0_1_1_2_0_0_0_3_0	13871
165283	VN226T		Vietnam	2019	0_14_0_1_8_0_0_0_0_0_0	13871
165298	GK124		Denmark	2017
165299	F91	VNGI00000000; VNGI01; VNGI01000000	France	2019
165300	SC18-68		China	2018	0_14_0_0_39_0_0_0_0_0_0	7363
165301	SC18-33		China	2018	0_14_0_0_11_4_0_0_0_0_0	1903
165302	SC18-26		China	2018	0_14_0_0_11_4_0_0_0_0_0	1903
165303	SC18-25		China	2018	0_14_0_0_11_4_0_0_0_0_0	1903
165304	GC196		China	2017	0_14_0_0_11_5_0_0_0_0_0	1903
165305	GC185		China	2017	0_14_0_0_14_0_0_0_0_0_0	1903
165306	YL201		China	2020	0_14_0_0_23_0_0_0_1_0_0	1600
165307	DG18193		China	2018	0_14_0_1_9_1_0_0_0_0_0	1903
165308	DG19112		China	2019	0_14_0_0_27_2_0_0_0_0_0	13943
165309	MM08		China	2017	0_14_0_1_9_0_0_0_0_0_0	1903
165310	DG17067		China	2017	0_14_0_0_13_1_0_0_0_0_0	7365
165311	GD69		China	2018	0_14_0_0_37_0_0_0_0_0_0	1903
165312	CD20-63		China	2020	0_2_17_0_65_0_0_0_0_1_0	7363
165313	CD20-60		China	2020	0_14_0_0_34_1_0_1_0_0_0	1903
165314	CD20-6		China	2020	0_14_0_0_34_1_0_0_0_1_0	1903
165315	CD20-48		China	2020	0_14_0_0_33_0_0_1_0_0_0	1903
165316	CD20-37		China	2020	0_0_15_0_18_0_0_0_0_0_0	8123
165317	CD20-24		China	2020	0_2_17_0_65_0_0_0_0_0_0	7363
165318	CD19-97		China	2019	0_14_0_0_34_1_0_0_0_1_0	1903
165319	CD19-81		China	2019	0_0_15_0_14_1_0_0_0_0_0	8123
165320	CD20-7		China	2020	0_14_0_0_40_0_0_0_0_0_0	7356
165321	CD20-64		China	2020	0_0_15_0_19_0_0_0_0_0_0	8123
165322	CD19-46		China	2019	0_14_0_0_34_1_0_0_0_0_0	1903
165323	CD19-21		China	2019	0_14_0_0_11_8_0_0_0_0_0	1903
165324	ZJ20_230		China	2020	0_14_0_0_23_0_0_0_0_0_0	1600
165325	ZJ20_215		China	2020	0_14_0_0_11_3_1_0_0_0_0	1903
165326	ZJ20_23		China	2020	0_14_0_0_41_0_0_0_0_1_0	1903
165327	ZJ19_F9		China	2019	0_14_0_0_11_6_0_0_0_0_0	1903
165328	GC063564		Canada	2017	0_14_0_0_38_0_0_0_0_0_0	1903
165329	A7536		Australia	2017	0_14_0_0_11_7_0_0_0_0_0	1903
165330	SZ2017191		China	2017	0_14_0_0_11_1_2_0_0_1_0	1903
165331	A7846		Australia	2017	0_14_0_0_38_1_0_0_0_0_0	1903
165332	668039		Norway	2019	0_14_0_0_32_0_0_0_2_0_0	1903
165333	668041		Norway	2019	0_14_0_0_32_0_0_0_2_0_0	1903
165334	668043		Norway	2019	0_14_0_0_32_0_0_0_2_0_0	1903
165335	TH2288		Thailand	2023	0_0_26_31_0_0_0_0_1_1_0	8143
165336	TH1713		Thailand	2023	0_0_26_31_0_0_0_0_1_0_0	8143
165337	18DG342		Singapore	2018	0_14_0_1_1_2_0_1_0_0_0	13871
165338	LRRBGS-1327		USA	2022	0_0_15_0_14_0_0_0_2_0_0	8123
165339	LRRBGS-1328		USA	2022	0_0_15_0_14_0_0_0_2_0_0	8123
165340	SE690		Sweden	2022	0_0_30_9_7_0_0_0_1_0_0	8130
165341	F93		France	2022	0_2_9_31_0_1_0_0_1_1_0	16406
165342	F94		France	2023	0_2_9_43_0_0_0_0_0_0_0	16406
165343	NJ189125	CP041586	China	2018		1903
165344	NJ1911400	CP130896	China	2019	0_14_0_0_36_0_0_0_0_0_0	1903
165345	NJ1913940	CP130895	China	2019	0_14_0_0_34_1_0_0_0_2_0	1903
165346	NJ1914215	CP130894	China	2019	0_14_0_0_43_0_0_0_0_0_0	7363
165347	NJ1914646	CP130893	China	2019	0_14_0_0_41_0_0_0_0_0_0	1903
165348	NJ195417	CP130899	China	2019	0_14_0_0_11_1_3_0_0_0_0	1903
165349	NJ196610	CP130898	China	2019	0_14_0_0_36_2_0_0_0_0_0	1903
165350	NJ197542	CP130897	China	2019	0_14_0_0_36_1_0_0_0_0_0	1903
165351	NJ204705	CP130892	China	2020	0_2_0_67_0_0_0_0_0_0_0	11710
165352	NJ208430	CP130891	China	2020	0_14_0_0_42_0_0_0_0_0_0	1903
165353	NJ208756	CP130890	China	2020	0_14_0_0_35_1_0_0_1_0_0	1903
165354	NJ209649	CP130889	China	2020	0_14_0_0_43_0_0_0_1_0_0	7363
165355	BJ16148	CP050505	China	2016	0_14_0_0_11_1_1_0_1_0_0	1903
165356	F92	JAPIVM01	France	2022	0_2_0_4_343_0_0_0_0_0_0	1901
165357	TUM15748	AP023071	Japan	2013	1_8_6_0_9_5_0_0_0_0_0	7359
165516	F89		France	2011	0_2_0_1_0_0_0_0_0_5_0	1901
